# Supplementary material for: Neural basis for regulation of vasopressin secretion by anticipated disturbances in osmolality
Source: eLife. 2021 Sep 29;10:e66609. doi: 10.7554/eLife.66609 (PMC8601670; doi:10.7554/eLife.66609)
Supplement: Figure 2—figure supplement 1—source data 1. [file elife-66609-fig2-figsupp1-data1.xlsx]

## Sheet: Figure 2-supplement 1b
Mouse#	latency to drinking onset (s)	dF/F
		time (s), water bowl presented at 30s
		1	2	3	4	5	6	7	8	9	10	11	12	13	14	15	16	17	18	19	20	21	22	23	24	25	26	27	28	29	30	31	32	33	34	35	36	37	38	39	40	41	42	43	44	45	46	47	48
Day1	85.658	0.0025599	0.00290876	0.00888324	0.00685016	0.00174898	0.00358799	0.00776736	0.00560952	0.00657292	0.00657292	0.00878158	0.00501115	-0.00248351	-0.00265679	-0.00333602	-0.00490935	-0.00915571	-0.0110617	-0.0098257	-0.0129123	-0.0115307	-0.005011	-0.000656055	-0.00136763	-0.002435	-0.00138149	-0.00282775	-0.00414925	0.00115754	0.00286949	0.0148184	0.0137811	0.0226527	0.0405946	0.0588531	0.0820348	0.10563	0.123179	0.143796	0.154135	0.161126	0.166033	0.160766	0.150945	0.143094	0.142267	0.132908	0.128112
Day2	53.132	0.0296718	0.0203	0.0168049	0.00824241	0.00233854	0.00357146	0.0137199	0.0174485	0.0156779	0.0206666	0.0178396	0.0125332	0.00375884	0.000160575	-0.00151499	-0.00346484	-0.00265286	-0.00201196	-0.00893149	-0.0132413	-0.0139636	-0.0161307	-0.0153432	-0.019414	-0.0116444	-0.00851056	-0.0108352	-0.0106478	-0.0156636	-0.0132494	-0.0155143	-0.0132684	-0.0189605	-0.0195959	-0.00537939	-0.00741886	-0.0165435	-0.0194058	-0.00342954	0.011561	0.023996	0.0234583	0.0135407	-0.00022505	-0.0166983	-0.031773	-0.0440451	-0.0444063
Day3	45.371	0.0224659	0.033434	0.0384977	0.0179182	-0.00404229	-0.00712413	0.00304448	-0.00234631	-0.0182691	-0.018887	-0.0017721	-0.00402049	-0.00443237	0.00114983	0.00686043	0.0081833	0.00802581	0.0191224	0.00247027	-0.0059321	3.04808e-05	0.000665262	-0.00106706	-0.00259829	-0.00832343	-0.0116427	-0.0123938	-0.0121418	-0.0188724	-0.0230542	-0.0128154	0.000224307	-0.00594421	-0.0200184	-0.00839127	-0.0155217	-0.0115337	0.00958854	0.00472592	-0.00084416	-0.0151122	-0.0259931	-0.0292785	-0.0517308	-0.0655094	-0.0637917	-0.0857909	-0.105498
Day4	48.036	-0.00698463	-0.00107757	-0.00903518	-0.0215961	-0.0227567	-0.027792	-0.0339983	-0.0392418	-0.0201831	-0.0207998	-0.0325671	-0.0297905	-0.0231991	-0.0273783	-0.0224809	-0.00486641	0.0192276	0.0210231	0.0245335	0.0216789	0.0213588	0.0159358	0.0185536	0.0210544	0.0257071	0.0207863	0.0184938	0.0289963	0.033316	0.0329023	0.02018	0.0271149	0.0378075	0.00904769	-0.00677385	-0.0104248	-0.0108802	-0.015343	-0.0244143	-0.0438764	-0.0536113	-0.068038	-0.0710748	-0.0661905	-0.0745774	-0.0645615	-0.0558518	-0.0777131
[truncated: 313 more columns]

## Sheet: Figure 2-supplement 1a
latency					pre-ingestive					post-ingestive
day1	day2	day3	day4		day1	day2	day3	day4		day1	day2	day3	day4
55.658	23.132	15.371	18.036		0.0689	-0.0163	-0.0123	-0.0237		-0.1024	-0.1734	-0.2378	-0.1938
23.578	14.379	11.111	7.961		-0.0157	0.1176	0.0381	-0.0173		-0.1698	-0.1901	-0.1557	-0.1464
62.696	23.389	12.953	7.233		0.011	-0.0182	-0.0192	-0.0072897		-0.0843	-0.1639	-0.165	-0.0921
8.961	15.254	15.378	11.363		0.0297	0.00010618	-0.0061446	-0.0298		-0.0373	-0.1374	-0.0761	-0.1838
