# Supplementary material for: Neural basis for regulation of vasopressin secretion by anticipated disturbances in osmolality
Source: eLife. 2021 Sep 29;10:e66609. doi: 10.7554/eLife.66609 (PMC8601670; doi:10.7554/eLife.66609)
Supplement: Figure 2—figure supplement 2—source data 1. [file elife-66609-fig2-figsupp2-data1.xlsx]

## Sheet: Sheet1
Condition	Mouse#	latency to drinking/feeding onset (s)	dF/F
			time (s), water bowl/food presented at 30s
			1	2	3	4	5	6	7	8	9	10	11	12	13	14	15	16	17	18	19	20	21	22	23	24	25	26	27	28	29	30	31	32	33	34	35	36	37	38	39	40	41	42	43	44	45	46	47
food	1	42.825	-0.0010391	-0.00313113	-0.00311581	-0.00629981	0.00149497	-0.00450539	-0.000706473	5.72492e-05	0.000818784	0.00107919	0.00144683	-0.000846526	-0.0049343	-0.0050656	-0.00181595	0.00240531	0.00107482	0.00378395	0.00378395	0.00581471	0.00203549	5.50609e-05	-0.00307204	-0.000343213	0.00117767	0.00247096	0.00269855	0.00188887	0.00227839	0.00160439	-0.00109381	0.00419973	0.000801277	0.00233966	-0.00116383	0.00700953	0.00410782	0.00827219	0.0234635	0.0308403	0.0285535	0.0235598	0.0357596	0.0295973	0.0309191	0.0283981	0.0305055
		35.521	-0.00217898	-0.00275476	0.0102674	-0.000975463	-0.00703632	0.000736729	-0.00483276	-0.00783072	0.00982801	0.000883921	0.00546636	0.00319787	0.0129234	0.00564169	0.00532133	0.00776083	-0.0088654	0.00672615	0.00609409	-0.00496264	0.00444467	-0.0114737	-0.00692159	-0.00064428	-0.0108157	-0.0135214	-0.00967928	-0.000873727	0.0034468	-0.00473969	0.0153672	0.00746428	0.000838465	0.00885611	0.0104969	0.00498149	-0.00153609	-0.0086576	-0.0182879	-0.0293143	-0.0277904	-0.030494	-0.0347236	-0.0365397	-0.0376848	-0.0367172	-0.0373081
		34.731	0.00787184	0.00114472	0.00359593	0.00540634	-2.25149e-05	0.00139723	0.00113281	-0.00123025	0.000330039	0.00111376	0.0264119	0.0198229	0.0177862	-0.000317898	0.00462739	-0.000446533	-0.00446517	0.00485845	0.0053849	-0.00814793	-0.00851954	-0.013522	-0.0207946	-0.0161114	-0.00946286	0.00574937	-0.00533941	-0.00730466	-0.00371957	-0.0137817	-0.0262711	-0.0243702	-0.0350492	-0.0243988	-0.0134887	-0.0230576	-0.0242606	-0.0318667	-0.0280196	-0.0291797	-0.0394943	-0.0458212	-0.0446968	-0.0471052	-0.0493968	-0.0408116	-0.0390846
		39.05	0.000320028	-0.00349495	-0.00205529	-0.00766441	-0.00845538	-0.008166	-0.00832275	-0.00527704	-0.00450536	-0.00398207	-0.00387596	-0.00548443	0.0100287	0.0135495	0.00527564	-0.000495055	-0.00199982	-0.00495631	-0.00768129	-3.20495e-05	-0.0072834	-0.00613553	-0.00499248	0.00414706	-0.00322968	0.00573623	0.00992499	0.00377328	0.0162479	0.0149192	0.0141668	0.0121194	0.00681417	0.0150108	0.0253416	0.0212662	0.0196795	0.0309676	0.0358967	0.0268223	0.00525876	0.00173075	-0.0101314	-0.0236236	-0.0238407	-0.0185258	-0.0311354
		36.765	0.0152391	0.00579488	-0.0133756	-0.00321018	-0.00694535	-0.00404228	0.00577639	-0.00136109	-0.00011527	0.00232553	-0.00214465	-0.00684134	0.00717477	-0.00326797	0.0107458	0.00350432	0.00644207	-0.000193856	-0.000649195	-0.000332538	0.00877885	0.015008	-0.00447681	0.000913286	-0.00424336	-0.00435431	-0.00575962	0.00437571	-0.00624963	-0.00525343	-0.0132623	0.00553139	0.0389814	0.00268841	0.00647211	0.000524978	0.00207821	0.0137853	0.00106584	-0.0134495	-0.0273015	-0.0301977	-0.0406057	-0.0441745	-0.0394385	-0.0423577	-0.0444703
		34.644	0.00615351	0.00825715	0.00347294	-0.000851611	0.0039842	-0.00969771	-0.00964143	-0.0123712	0.00343776	0.0259376	0.00873089	-0.00815926	-0.0122985	0.0174339	0.00368401	-0.0268435	-0.00997679	0.000562546	0.0147252	0.0065733	0.00580173	0.000790031	0.0083791	0.00272248	0.0165803	0.000494535	-0.00431313	-0.0169913	-0.0180748	-0.0237056	0.0152036	0.0205226	-0.00994161	-0.0195405	0.00436881	0.00398654	-0.00587269	-0.00269025	-0.0245827	-0.0108891	0.00834627	0.0091624	-0.00753778	-0.0188276	-0.0217943	-0.0242989	-0.0294654
		36.91	-0.0087638	-0.00223003	0.0144641	0.0311262	0.00402512	0.00232602	0.00800568	-0.00173446	-0.000373354	-0.0019263	-0.000592593	-0.00660567	0.009449	0.0133496	0.00170713	-0.00238076	-0.010568	-0.00298823	0.004829	-0.00516692	-0.022585	-0.0032029	0.00384242	-0.0120981	-0.0113102	-0.00680436	0.0193558	-0.0018418	0.0171566	0.00436083	0.0100245	0.00638194	-0.0161654	-0.0130961	-0.0174146	-0.0111023	-0.0109128	-0.0302561	-0.0428805	-0.0538539	-0.0579144	-0.0624887	-0.0711555	-0.0628838	-0.0637402	-0.0557768	-0.0527006
		34.308	-0.00385422	-0.00510049	-0.013167	-0.00793135	-0.00248804	-0.00551805	0.000743255	0.0127605	-0.00655232	-0.00451162	-0.0103639	-0.00668294	-0.00351589	0.00699385	0.0018589	-0.0195803	-0.011501	0.0258827	0.0259726	0.0154672	0.0176257	-0.00500198	-0.000130415	-0.00539813	-0.00435316	-0.0035009	-0.000507293	0.00444351	0.00301309	0.00782898	0.00011584	-0.0113083	0.0154051	0.0163002	0.019358	0.00960844	-0.00378998	-0.00855877	-0.00764869	-0.0284712	-0.0278052	-0.0335804	-0.0391501	-0.0353492	-0.0375741	-0.0388246	-0.0359552
		35.47	-0.0119771	0.00289046	-0.0056207	0.00527309	0.00540942	0.0125939	0.0159451	0.00410517	0.00874429	0.00613987	0.00937708	-0.00725253	0.00606459	-0.011265	-0.0105223	0.00280703	0.00297998	0.00171643	0.00158621	-0.0129945	0.000943248	0.00639218	-0.0051812	-0.00223699	-0.00212915	0.00394443	0.0130192	0.00231871	-0.0143374	-0.0200081	-0.00872565	0.00276634	-0.00605409	0.00898845	0.00816237	0.000699084	-0.00881721	-0.0181829	-0.0266351	-0.0394517	-0.0530658	-0.0542256	-0.0546895	-0.0560894	-0.0603928	-0.0592513	-0.0608669
		48.534	0.00419269	-0.0143026	-0.0107435	-0.00530315	-0.00206301	0.00137567	0.00299655	0.00189318	-0.00188562	0.00472647	-0.00315011	-0.00184494	-0.00282137	-0.00643581	-0.00476773	0.00141798	0.00367843	-0.000103628	-0.0045757	-0.00481981	-0.00455617	7.37576e-05	0.00793569	0.00824001	0.00948985	0.00583961	0.00449213	0.00685998	0.0118203	0.00365565	0.0218483	0.025466	0.0228003	-0.00689799	-0.00675152	-0.0120715	-0.016371	-0.0106687	-0.0196193	-0.00883459	-0.00177659	-0.00929677	0.0329813	0.0235961	0.0453136	0.079912	0.0605542
	2	35.279	0.0495053	0.00158237	-0.0205249	-0.021267	0.0101373	0.000674431	0.00156753	-0.00373662	-0.00804377	-0.00310577	-0.0254406	-0.0229889	-0.027682	-0.011537	-0.0197431	-0.0214204	-0.0194363	-0.021888	-0.0329936	-0.0393219	0.0048851	0.0213641	0.011399	0.00621361	0.0133188	0.00805917	0.00320034	0.0136651	0.0131135	0.0186106	0.121834	0.0454529	-0.02146	0.0170396	0.0189248	-0.00289301	0.062689	0.0397455	0.00626556	0.0162455	0.0155058	0.0272273	0.0259681	0.0193132	0.0273585	0.00907597	0.0242462
		34.995	0.0100036	0.00824033	-0.000300447	0.00957802	0.017248	0.0125075	0.0175585	0.0409007	0.017235	0.0137496	-0.0182267	4.26608e-05	0.00509807	0.00277015	0.00270718	0.00933263	-0.00031782	-0.0292561	-0.0151084	-0.00665446	0.00489177	-0.0246177	-0.0435494	-0.0323941	-0.00221794	-0.00688464	-0.00351437	-0.00478691	0.00810352	0.00315017	0.00471153	0.00412955	-0.00375541	0.00158882	-0.000593609	-0.0227914	-0.0448979	-0.000589266	0.0171872	0.0400907	0.0277171	-0.00174237	-0.000250501	0.0021404	0.0188115	0.00434888	0.0124966
		33.71	-0.00175347	0.00878172	0.0126403	0.000252836	-0.0105841	-0.00904194	0.0159786	0.0182867	0.0217915	0.0187675	0.02744	0.0151753	-0.00698152	0.0107131	0.0311196	0.0291591	-3.1554e-06	-0.00737696	-0.00882757	0.0258083	-0.0136664	-0.0287366	-0.0239956	-0.00681502	-0.0311509	-0.0237521	-0.0175792	-0.0214482	0.00821771	-0.0227323	0.0268676	0.0218081	0.0542774	0.0284056	0.0128193	-0.0327326	-0.0536302	-0.0320562	-0.0310676	-0.0321977	-0.0350053	-0.0359647	-0.0388993	-0.0529226	-0.0317711	-0.0358877	-0.0362228
		35.364	-0.051939	-0.0166111	0.00655677	0.0013893	-0.00360446	0.0324139	-0.021849	0.0013717	0.0210983	0.00510328	0.0289176	0.0114714	-0.00774724	-0.00249841	-0.0215389	-0.00363965	0.00597625	-0.00707437	0.00292854	-0.00749876	0.00213693	-0.0227153	-0.00640809	0.0151985	0.0180352	0.0247221	0.0144553	-0.00040063	-0.0342135	0.000839564	0.0151238	0.00437544	-0.0348182	-0.0384618	-0.0355043	-0.0402364	-0.0282148	0.000742811	-0.0242414	-0.0244723	-0.018379	-0.0111798	-0.0131082	-0.0108741	-0.0264755	-0.0481415	-0.0393128
		34.268	-0.0242383	-0.0366393	0.0010173	0.0102713	0.00218589	0.00679935	-0.0348797	8.10694e-05	-0.0341465	-0.0260972	-0.0120064	0.00838304	-0.0106461	0.000272827	-0.00790506	0.0153765	0.0228054	0.024335	0.0203555	0.0252509	0.0192703	0.0348884	0.0123152	0.0251945	0.00858156	0.00449149	-0.0206829	0.00889965	0.0142937	-0.0207167	-0.0371108	-0.0408309	-0.00150488	0.011864	-0.00111008	-0.0129855	-0.0119229	0.00400646	-0.00689439	0.0010376	0.033298	0.0252035	0.0122024	0.0133078	0.00392975	0.0123332	0.0119069
		37.378	0.0131172	0.0224273	-0.028171	-0.0234007	0.0217737	0.0283694	0.01012	0.037922	0.00295618	-0.00753046	0.0290135	-0.00469013	0.00913361	0.0199483	-0.0102757	-0.0192673	-0.0412555	-0.0181764	0.00722262	0.0157626	0.0245284	0.0511444	-0.017266	-0.0442171	-0.0367062	-0.0136841	-0.00954365	-0.038862	0.00404003	0.0148024	0.000764731	0.0227054	0.0539585	0.0810546	0.034062	0.0339859	0.0235872	-0.01912	0.0191473	-0.00685544	0.0042991	0.0295269	0.0157222	0.0136045	0.0237797	0.0220327	0.0190902
		35.127	-0.01372	0.000637736	-0.0220687	-0.0248331	-0.00677382	-0.012239	-0.00760465	-0.0111574	0.031442	-0.00146164	0.0288646	0.0638442	0.010121	0.00870801	-0.0108515	0.0046835	0.00866126	0.0225197	-0.0120711	-0.00579001	-0.0130549	-0.0220198	0.00112858	0.0190753	0.0182423	0.00447951	0.0123012	0.00729284	-0.0302622	-0.0158109	-0.0322829	-0.0042856	0.00450713	0.0327573	-0.00644022	0.0208453	0.0501792	0.0433116	0.00184466	0.0107245	0.037585	0.027613	0.0473425	0.0402751	0.0336349	0.0415161	0.0131809
		35.369	-0.012527	0.0246459	0.0161458	0.0411141	0.0174078	0.0224422	0.0382561	-0.0150879	-0.0301349	-0.00871573	0.0226208	0.0118317	0.0160545	0.0189474	-0.0111718	-0.0391048	-0.0179497	-0.030894	-0.0334646	-0.0163907	-0.0272808	-0.012261	-0.0172294	-0.0208368	-0.000617537	0.0134373	0.0202677	0.0136528	0.00680111	0.00168708	0.00835435	0.00947462	-0.000714614	-0.00812744	0.0227101	0.00754278	0.0260612	0.083599	0.0242478	0.00120169	0.00759326	0.01348	0.0140431	0.0276436	0.0303191	0.0173107	0.0194852
water	1	52.07	-0.0246657	-0.0103654	-0.00527615	0.0048459	-0.000698787	-0.00699435	0.00522021	0.0118788	0.00798917	0.0113309	0.035875	0.0321049	0.0165193	0.014314	0.000455699	0.00402739	-0.00153985	0.000940493	-0.00576094	-0.00740473	-0.00646896	-0.00511605	-0.000775452	-0.00726493	-0.00825481	-0.00404048	-0.00968664	-0.00627505	-0.00575643	-0.0106562	0.0020093	0.00943905	0.0168079	-0.00261091	-0.00370226	0.00186047	0.00608608	0.0131122	0.0114707	0.0197099	0.0102147	0.000318153	0.00413788	0.010465	0.00736458	0.00457081	0.00187175
		39.566	0.00710726	0.00216746	-0.0131769	-0.00284968	-0.00135696	-0.00166862	-0.0133222	-0.0154757	-0.00793009	-0.00550002	-0.00755749	-0.0127129	-0.0107538	-0.0133831	-0.0131206	-0.00201544	0.0108941	0.0055044	0.00157693	0.00222136	-0.000218084	0.0141795	0.0123119	0.0117846	0.00998491	0.00271346	0.010552	0.00690574	0.00693854	0.00732285	0.0088765	0.0107887	0.0297488	0.0189084	0.0230796	0.0284904	0.0350425	0.035087	0.0373226	0.0400315	0.0355932	0.0333998	0.0335732	0.0303956	0.0446034	0.0338989	0.0279983
		36.758	0.0096095	-0.00395641	-0.000133226	0.00556683	0.0121404	0.0164787	0.0112154	-0.00132475	-0.00319939	0.00704504	0.000547645	0.0138985	0.0248149	0.0182301	-0.00637305	-0.00687923	-0.00722414	-0.0189356	-0.00921972	-0.0159478	-0.0218315	-0.00152185	-0.0141157	-0.0090383	-0.00917941	-0.00667989	-0.000905926	0.00123747	0.000711143	0.00485684	0.0101134	0.00294861	0.0171058	0.0105367	0.0198517	0.0216591	0.0283491	0.0332967	0.0278519	0.020705	0.0115737	0.00318378	0.00810666	0.00476277	-0.000731228	0.010586	0.00217815
	2	36.537	-0.0253479	-0.0197307	-0.00883203	-0.0125337	-0.0145853	-0.00848753	0.0254154	0.0232738	0.00853963	0.0167702	-0.0134772	-0.0116121	-0.0173237	-0.00257191	0.00276663	-0.0185722	-0.017734	0.000754529	0.000348598	-0.0100586	0.00623569	0.0212442	0.0158003	0.0137685	0.0267407	0.0199847	0.016893	0.00327788	0.00936904	-0.00116103	0.00606235	0.00622911	-0.00421538	-0.00746941	-0.0145173	-0.00432729	0.00662846	-0.00487146	-0.0119676	-0.0111316	-0.010956	-0.0280205	-0.0268927	-0.013091	-0.0219864	-0.0219118	-0.0176374
		39.637	0.00129802	-0.00839837	-0.00956887	-0.00873551	-0.00625918	-0.00643962	-0.00916525	-0.00498896	-0.0126364	-0.00447376	-0.00300173	-0.000366322	0.00122679	0.0015117	0.00180848	0.00220023	0.00264896	0.00426819	0.00443914	0.00118406	0.00377198	0.00739744	0.0104745	0.0114052	0.0117732	-0.00456635	-0.00292338	-0.000962256	0.00653559	0.00802186	0.00360815	0.00667092	-0.00442627	0.00926596	-0.00372824	0.0018156	-0.00742968	-0.0124583	0.0225498	0.00227146	-0.0101648	-0.0151008	-0.0165349	-0.0163687	-0.0160363	-0.0167699	-0.0161336
		36.641	0.0082221	0.0100138	0.0094433	0.0101141	0.00950793	0.00937199	0.00999151	0.0104929	0.0103481	-0.0041861	-0.0128504	-0.0124582	-0.00720123	-0.00593323	-0.00555884	-0.00362229	-0.000736406	0.00249712	-0.00276655	-0.0023788	-0.00275764	-0.00273981	-0.00369137	-0.0029426	-0.00329248	-0.00145621	-0.00299163	-0.00434209	-0.00921578	-0.00457831	0.00569722	0.00712791	-0.00193087	-0.00622293	-0.000725263	-0.00723466	0.00219628	-0.00343956	-0.0140248	-0.0190278	-0.0209086	-0.0284454	-0.0371543	-0.00188853	-0.00241668	0.00765383	0.0040994
[truncated: 314 more columns]
