# Supplementary material for: Neural basis for regulation of vasopressin secretion by anticipated disturbances in osmolality
Source: eLife. 2021 Sep 29;10:e66609. doi: 10.7554/eLife.66609 (PMC8601670; doi:10.7554/eLife.66609)
Supplement: Figure 2—figure supplement 3—source data 1. [file elife-66609-fig2-figsupp3-data1.xlsx]

## Sheet: Sheet1
Group	Cell #	Baseline	CNO
SFO cre-indep. hM4Di	1	0.833985	0.0931242
	2	0.437931	0.307899
	3	0.404106	0
	4	0.710126	0
MnPO cre-indep. hM4Di	1	0.086889	0
	2	0.321368	0.0374772
	3	1.03292	0
	4	1.27181	0.492566
	5	0.612198	0
	6	1.93174	0.0832649
	7	1.4236	0
	8	0.915303	0
	9	1.2422	0.0698356
	10	0.376411	0
	11	1.5304	0
	12	1.57138	0
MnPO Vgat-flp	1	0.160096	0
	2	0.47007	0
	3	1.65881	0
MnPO Vglut2-flp	1	1.1064	0
	2	0.826332	0.0702529
	3	1.30623	0.2407
	4	0.517141	0
