# Supplementary material for: Neural basis for regulation of vasopressin secretion by anticipated disturbances in osmolality
Source: eLife. 2021 Sep 29;10:e66609. doi: 10.7554/eLife.66609 (PMC8601670; doi:10.7554/eLife.66609)
Supplement: Figure 2—source data 1. [file elife-66609-fig2-data1.xlsx]

## Sheet: Figure 1b-f
Treatment	Mouse#	latency to drinking onset (s)	dF/F
			time (s), water bowl presented at 30s
			1	2	3	4	5	6	7	8	9	10	11	12	13	14	15	16	17	18	19	20	21	22	23	24	25	26	27	28	29	30	31	32	33	34	35	36	37	38	39	40	41	42	43	44	45	46	47
Saline	1	48.036	-0.00698463	-0.00107757	-0.00903518	-0.0215961	-0.0227567	-0.027792	-0.0339983	-0.0392418	-0.0201831	-0.0207998	-0.0325671	-0.0297905	-0.0231991	-0.0273783	-0.0224809	-0.00486641	0.0192276	0.0210231	0.0245335	0.0216789	0.0213588	0.0159358	0.0185536	0.0210544	0.0257071	0.0207863	0.0184938	0.0289963	0.033316	0.0329023	0.02018	0.0271149	0.0378075	0.00904769	-0.00677385	-0.0104248	-0.0108802	-0.015343	-0.0244143	-0.0438764	-0.0536113	-0.068038	-0.0710748	-0.0661905	-0.0745774	-0.0645615	-0.0558518
		46.549	0.0106779	-0.0117411	-0.0310031	-0.0448223	-0.0365065	-0.0249755	-0.0294501	-0.026594	-0.0219423	-0.0139687	-0.00332094	-0.00209795	0.0118256	0.0194668	0.0236454	0.0261641	0.015776	-0.00222656	-0.00455363	-0.011263	-0.0244878	-0.0200811	-0.0107656	0.00327929	0.00870507	0.0253779	0.0357272	0.0356301	0.036591	0.037154	0.0297797	0.0196124	0.0138348	0.0296972	0.0303087	0.0386803	0.0350041	0.0300248	0.0272537	0.0282388	0.0214226	0.0176494	0.0113719	0.00640227	-0.000273183	-0.00754314	-0.0110811
		36.651	0.00077914	-0.00741153	-0.0109531	-0.00621153	0.00453979	0.0105836	0.0133925	0.0138745	0.00738523	-0.00191295	-0.000583943	0.00580794	-0.000211529	0.000241209	-0.00491417	-0.016033	-0.0184963	-0.0128006	-0.00528415	-0.00465615	0.00894547	0.0264489	0.0214883	0.0128084	0.0125601	0.00366352	0.00171626	-0.0027454	-0.0099308	-0.0201734	-0.0219162	-0.00417421	0.0104643	-0.00475595	0.00619253	0.0116668	0.0165836	0.0138039	-0.0206919	-0.043913	-0.0598829	-0.073212	-0.0880623	-0.101401	-0.114046	-0.124357	-0.135522
		46.746	-0.00767825	-0.0139052	-0.0149584	-0.00761991	0.000154615	0.00172364	0.00504593	0.00870905	0.000268224	0.00977145	0.00626493	0.00487399	0.00558327	0.0150497	0.0251578	0.0157896	0.0108461	0.000888466	-0.00183507	-0.00763834	-0.00426692	-0.0100702	-0.0115133	-0.0141969	-0.0134262	-0.00439895	0.00364578	0.000995934	-0.00466915	-0.00264262	0.00405109	0.0187711	0.0385667	0.0510421	0.0482142	0.0426627	0.0393619	0.0361962	0.0298802	0.0301627	0.0110181	0.00249127	0.00327732	-0.00178288	-0.00216976	-0.00669876	-0.0184312
		37.361	0.0343878	0.0361515	0.0232022	0.0107744	0.00359685	0.00674227	0.00467816	0.00133331	0.00853003	0.0130067	0.00143904	0.002232	-0.0014757	-0.0127261	-0.0144034	-0.00520021	0.00376025	0.00486559	0.00299853	-0.00445531	0.00515875	-0.00803806	-0.0122239	-0.0136416	-0.0113829	-0.010501	-0.00901604	-0.00970568	-0.0144514	-0.0188776	-0.0167582	-0.0130481	-0.00853065	-0.0291669	-0.0370845	-0.0325117	-0.0361545	-0.051401	-0.0631297	-0.0830907	-0.0957925	-0.107603	-0.118726	-0.128107	-0.137791	-0.145206	-0.151093
	2	40.083	0.0535677	0.0541638	0.0604551	0.0521929	0.037152	0.0381507	0.034805	0.0522274	0.0402619	0.00421983	0.00478936	0.000799993	-0.00951515	-0.0179204	-0.0168926	-0.0102489	-0.0182647	-0.0114145	0.001698	0.000466221	-0.00579333	-0.00874429	-0.0159522	-0.0136131	-0.0196766	-0.0233216	-0.0339573	-0.0409321	-0.0597372	-0.0646723	-0.0642935	-0.0728417	-0.0838165	-0.0795543	-0.0635729	-0.0570591	-0.0391202	-0.000953634	-0.00158144	0.0190727	-0.00246355	-0.0243812	-0.0446433	-0.055626	-0.0708365	-0.0870535	-0.0959965
		37.692	-0.0521972	-0.0377456	-0.0351996	-0.0216548	-0.00998791	0.00998725	0.00531084	0.00228277	-0.00447586	-0.00227196	0.0109239	-0.000924365	0.0242988	0.0165462	0.000627549	-0.00647085	-0.00131005	0.00128183	-0.0159752	-0.00839008	-0.00392948	-0.00720319	0.00841467	0.0359359	0.0425201	0.0333257	0.0370241	0.010412	0.00353395	-0.000802691	-0.0338865	-0.0727532	-0.0723744	-0.0676246	-0.0711324	-0.048508	-0.0355784	-0.0257183	-0.0265011	-0.029008	-0.0335352	-0.0335743	-0.0311798	-0.0356886	-0.0473119	-0.0563066	-0.06096
		37.017	0.00705742	0.00340537	0.00242918	0.00232544	-0.00675016	-0.0160093	-0.0143522	-0.0271224	-0.016762	-0.0231671	-0.020454	-0.0156981	-0.0126046	-0.0124025	-0.00554256	-0.00517549	-0.00596016	-0.0016325	-0.00336941	-0.00717574	-0.000236045	0.0155718	0.0129066	0.0086906	0.0300789	0.0387608	0.0307332	0.0178646	0.00733139	0.0128081	0.011042	-0.00702147	-0.0191028	-0.0273006	-0.0294099	-0.0143921	-0.0120115	-0.00737523	-0.00702147	-0.0166423	-0.0237869	-0.0328571	-0.03906	-0.0408821	-0.0378445	-0.011272	-0.0114396
	3	37.959	-0.0244186	-0.0242876	-0.0139635	-0.00623411	-0.0107359	-0.00451798	0.00464384	-0.0127412	-0.0111124	-0.000550952	0.0117485	0.00499034	-0.00251537	0.0132736	0.00830256	0.00112153	-0.00158227	-0.00792842	-0.00554384	0.00337515	-0.00467077	-0.00394502	0.00317871	0.00367254	-0.0040678	0.00511857	0.0107144	0.0125452	0.014234	0.0219252	0.0199717	-0.00641419	-0.0281919	-0.0526571	-0.051814	-0.0598517	-0.0660315	-0.0717228	-0.0623291	-0.0747731	-0.0892934	-0.101937	-0.119442	-0.12805	-0.132969	-0.141915	-0.147227
		39.376	0.0588076	0.0588381	0.0717384	0.0564654	0.044262	0.0267693	0.0237371	0.0105343	0.0141103	0.00561211	-0.00235582	-0.0177716	-0.0144097	-0.018856	-0.0275955	-0.0297473	-0.0469137	-0.0462066	-0.0341222	-0.0210655	-0.0187472	-0.00139042	0.00714179	0.00607442	-0.000754751	-0.0100314	-0.0220921	-0.0241826	-0.022364	-0.0186282	-0.00685647	-0.0307399	-0.0417502	-0.039782	-0.0365968	-0.0428651	-0.0317359	-0.0179619	-0.0132573	-0.0125707	-0.0132539	-0.0312464	-0.0476887	-0.0640597	-0.0752059	-0.0881198	-0.0942521
		35.101	0.00387414	0.00431485	-0.0136816	-0.00313187	-0.0191905	-0.00858636	0.00474348	-0.00695333	-0.0130568	-0.00946475	-0.0025342	-0.00208142	-0.00272739	-0.00848071	-0.00318922	-0.00473471	0.0184929	0.00886075	-0.00417327	-0.00192446	-0.00277569	-0.0126523	-0.0121845	-0.0057097	0.00344551	0.0151725	0.025185	0.0102855	0.000734866	0.0210435	0.0210798	-0.0129632	-0.0291335	-0.0314155	-0.0292875	-0.0115023	-0.0193263	-0.032152	-0.0411805	-0.0566625	-0.0654857	-0.0708979	-0.0793619	-0.0906693	-0.0940893	-0.103214	-0.100105
		34.615	0.0180893	0.0262509	0.0265133	0.0222096	0.019253	0.00802724	0.00423895	0.00210132	0.00372351	0.00380573	0.0020191	0.00380257	0.0111926	0.00626907	0.0117713	0.0126914	-0.00259452	-0.0086406	-0.008005	-0.00604445	-0.0101553	-0.00803346	-0.00896946	-0.00512742	-0.013172	-0.017131	-0.0232657	-0.0261306	-0.030681	-0.034855	-0.0338084	-0.061917	-0.0769436	-0.0671599	-0.0484113	-0.0588686	-0.0762606	-0.100344	-0.121666	-0.139716	-0.15029	-0.154281	-0.165017	-0.174421	-0.179901	-0.192588	-0.195731
		34.608	-0.0277046	-0.0382599	-0.0409267	-0.0638444	-0.0413525	0.00161125	-0.0125253	-0.00369508	0.000481201	0.0119782	0.010335	0.00309069	0.00471207	0.0284977	0.0405543	0.0400767	0.0498322	0.0259292	0.00617786	0.0123003	-0.00180074	0.00620516	0.00250929	-0.00500801	-0.00228388	0.0135014	0.0117681	0.00637985	-0.00434745	-0.00650383	-0.0486979	-0.0698986	-0.0801073	-0.0959253	-0.100623	-0.0960508	-0.122299	-0.140601	-0.153651	-0.156921	-0.174445	-0.17492	-0.18212	-0.188475	-0.189165	-0.185079	-0.182169
	4	46.808	0.0236024	0.0162678	0.00680939	-0.00184133	0.0153993	-0.0035053	0.00291949	-0.00392129	-0.011487	-0.0070303	0.00361524	-0.00132559	-0.00888159	-0.0064951	-0.0100298	-0.0064878	0.00202182	0.00434506	-0.00257357	0.00422342	-0.0076628	-0.00288739	0.00244268	0.00128714	0.00186612	-0.0136765	-0.0211473	-0.00741466	0.0163237	0.00434506	-0.0374927	-0.0456982	-0.052033	-0.0603845	-0.0656148	-0.0772042	-0.0826073	-0.103315	-0.10176	-0.103302	-0.107713	-0.119181	-0.114198	-0.116103	-0.119477	-0.125725	-0.116312
		38.804	0.0177581	-0.0069774	-0.0169434	0.00321542	0.0125615	0.0174046	0.0241075	0.026268	0.0273653	0.0239018	0.024862	0.0291881	0.0336119	0.0256903	0.0178716	0.0226303	0.0208418	-0.00637332	3.93983e-05	0.000659303	-0.00599346	-0.0072702	-0.0193966	-0.0587118	-0.0412938	-0.0326177	-0.015416	-0.0120237	-0.014841	-0.0271283	-0.0629904	-0.0914902	-0.098784	-0.0964864	-0.104458	-0.120201	-0.136493	-0.120343	-0.13902	-0.107755	-0.100718	-0.0999262	-0.102324	-0.102672	-0.109225	-0.112121	-0.112559
		37.297	0.00146095	-0.00334145	-0.00148067	0.00046436	-0.00194526	-0.00303333	-0.000907754	-0.00337997	-0.00170936	0.00182925	0.0127604	0.0145394	0.0129434	0.014951	0.0145971	0.00379836	-0.00151678	0.00315804	0.0023444	-0.00193082	-0.00274687	-0.00701486	-0.0102044	-0.00874806	-0.00545499	-0.00528648	-0.00468949	8.16124e-05	-0.0041599	-0.0128355	-0.0140656	-0.0109001	-0.00386382	-0.000385388	-0.0103874	-0.00642028	-0.0116776	0.0134128	0.000707489	-0.0105101	-0.0225751	-0.0342116	-0.0408339	-0.0488234	-0.06344	-0.0841662	-0.08984
		40.533	-0.00568149	-0.00456668	-0.00320852	-0.0103487	-0.0115509	-0.0106358	-0.0119544	-0.0131857	-0.00769066	-0.00249304	-0.00123471	0.00220333	0.00213677	0.00161057	0.000460391	-0.00413198	-0.000916489	-0.00213114	9.22527e-05	0.00344502	0.00494253	0.0155125	0.0127941	0.00913973	0.00737599	0.00772541	0.00844713	0.00922709	0.00446416	0.00471583	-0.0049369	-0.0135393	-0.00539863	-0.00746811	-0.0044814	-0.00360161	-0.00021141	-0.000708501	-0.00294021	-0.00439405	0.00454944	0.000974122	-0.00863076	-0.0175514	-0.0248351	-0.0443111	-0.0417009
		36.956	0.0314389	0.0307854	0.027908	0.0190693	0.0131231	-0.000282712	-0.00660667	-0.006962	0.00673452	0.00562627	0.00997477	0.0083621	0.00655561	0.00808628	-0.000951138	-0.00430321	-0.00360993	-0.0106992	-0.00637557	-0.00132884	-0.00823673	-0.0151844	-0.0213568	-0.0152067	-0.0156664	-0.015162	-0.00849764	-0.00537169	-0.012128	-0.0295742	-0.0348868	-0.0400677	-0.0536698	-0.0698437	-0.0780885	-0.0747861	-0.0522236	-0.0607417	-0.0698735	-0.0762745	-0.0826681	-0.088259	-0.093005	-0.0975648	-0.101573	-0.106326	-0.112747
		38.451	-0.0156743	-0.00705548	-0.00878208	-0.00445376	-0.00247408	0.00105244	0.00562675	0.00401604	0.0161519	0.00631029	0.00019387	-0.0219823	-0.0168593	5.90538e-05	0.00443468	0.0104423	0.0165847	0.00826158	0.00355246	0.00701276	0.00813859	0.0040326	-0.00314816	-0.0120768	-0.00954368	-0.00184967	0.00570007	0.013465	0.017027	0.000759154	-0.0289218	-0.0284606	-0.030866	-0.0487067	-0.0622286	-0.0653767	-0.0680707	-0.0594022	-0.0559182	-0.055878	-0.0653625	-0.0729525	-0.0806678	-0.0844639	-0.0932956	-0.100647	-0.106451
		41.445	-0.0147243	-0.00802245	-0.0286201	-0.0180493	-0.0177832	-0.0179504	-0.0140296	-0.00467153	0.00434276	0.00524937	0.00698488	0.00991193	0.000546776	0.00926671	0.0129402	0.0302011	0.0348802	0.0241257	0.0110305	0.00703433	-0.00242502	-0.0137518	0.00450995	0.0153116	0.013861	0.00413554	-0.00294779	-0.0104903	-0.00595726	-0.0133467	-0.0254647	-0.0448567	-0.0543019	-0.0585171	-0.0598216	-0.0551732	-0.0509274	-0.0387436	-0.0536379	-0.0525005	-0.0581285	-0.0547069	-0.0491943	-0.0542572	-0.0614512	-0.072712	-0.076256
	5	35.888	0.000963675	0.000471914	0.00487446	0.00153701	0.00222221	-0.00421264	-0.00517519	-0.00196126	-0.00474635	-0.00861285	-0.00237611	0.00322671	0.00651755	0.00160926	-0.00714689	-0.0115704	-0.0131902	-0.00545486	0.00451554	0.00389793	-0.000905485	-0.00591399	0.00223853	0.00723771	0.00885516	0.00706058	0.0166208	0.00341316	0.00327798	8.50301e-05	-0.00735898	-0.00331768	-0.0014392	-0.00442006	-0.0124561	-0.0198068	-0.0249552	-0.0328094	-0.0376314	-0.0476438	-0.0525964	-0.0589846	-0.0661979	-0.0717704	-0.0767696	-0.0817921	-0.085894
		37.416	-0.0206046	-0.022149	-0.016945	-0.0109554	-0.0112777	-0.00520533	-0.00475097	-0.00759804	-0.0025888	0.0058405	0.011519	0.00428714	0.00655226	0.0181039	0.0126112	0.0120517	0.00366267	0.000401516	-0.00392729	0.00390216	0.00102823	0.00624114	-0.00130628	-0.00116527	-0.00328714	-0.00486288	-0.00483602	-0.000708663	0.00539956	0.0142206	0.0163469	0.00730432	0.00798475	0.00220332	-0.00296036	-0.00892309	-0.0174173	-0.0188655	-0.0195929	-0.0292085	-0.0363038	-0.0390568	-0.0443548	-0.0490663	-0.0533481	-0.0583238	-0.0637404
		35.395	-0.0011446	-0.00126321	-0.00459294	-0.00605573	-0.00721982	-0.00664876	-0.00335198	0.000228141	-0.00257445	-0.00362213	-0.004068	0.00153719	0.0011682	0.00573888	-0.000248476	0.00532157	0.00950789	0.0145618	0.0152031	0.0105446	0.0141159	0.0100724	0.00758385	0.000779435	-0.00445237	-0.00344642	-0.00307303	-0.00431399	-0.00973688	-0.0179031	-0.0235434	-0.0243604	-0.0261395	-0.0261966	-0.0251753	-0.0241628	-0.0308398	-0.0351272	-0.0325552	-0.0356784	-0.0381757	-0.0433087	-0.0463551	-0.0495047	-0.0521492	-0.0544883	-0.0572843
	6	40.253	0.00123536	0.00536884	0.00851647	0.00935533	0.00993315	0.00477581	0.0113802	0.0118339	0.01413	0.0106402	0.0108252	0.0127817	0.00932998	0.00585289	0.000366087	0.00207675	-0.00186665	-0.00656021	-0.00576951	-0.00444152	-0.00320224	-0.0128707	-0.0104935	-0.0105568	-0.0107317	-0.0118722	-0.0138058	-0.0141606	-0.0135499	-0.00942907	-0.00550847	-0.00347341	-0.0137526	-0.0288369	-0.0394405	-0.0346177	-0.023824	-0.0299875	-0.0349167	-0.0290878	-0.0356846	-0.0523022	-0.0625991	-0.0665755	-0.0721789	-0.0803343	-0.0849138
		36.092	0.0563273	0.0520168	0.0489912	0.046488	0.0387674	0.0198073	0.0119148	0.00373829	-0.00815816	-0.0123811	-0.0109486	-0.0088444	-0.0101893	-0.00868542	-0.00961987	-0.0125725	-0.0128256	-0.023283	-0.0239823	-0.0240212	-0.0210994	-0.0254196	-0.0234112	-0.0164336	-0.0123583	-0.00747517	-0.0136497	-0.0164239	-0.0146134	-0.0152655	-0.0191056	-0.033038	-0.0483706	-0.0514351	-0.0265309	0.00731712	0.0088129	-0.029185	-0.0541233	-0.0758364	-0.0882828	-0.106536	-0.120445	-0.132661	-0.14332	-0.154507	-0.164274
		33.907	-0.019636	-0.0146641	-0.0194588	-0.00909002	-0.00492251	-0.00609959	-0.00495887	-0.00539971	0.00313527	0.00916838	0.00886161	0.00972283	0.0206688	0.0179101	0.0113248	0.0110363	0.00543035	0.00210134	-0.00782659	-0.0085492	-0.00469755	0.0049736	0.00845258	0.0111362	0.012511	-5.13112e-06	0.000265279	-0.00391813	-0.0038386	-0.00836513	-0.0152686	-0.0183271	-0.00711761	0.0187305	0.00575757	-0.0169137	-0.0362947	-0.0505378	-0.0613315	-0.0735523	-0.0848345	-0.0953214	-0.101377	-0.107826	-0.112289	-0.119727	-0.127391
		33.597	0.00977204	0.0145137	0.0146352	0.0184025	0.00906242	0.00217891	0.00104395	0.00152788	0.00348096	0.0102755	0.00787538	0.00763233	0.00594835	0.00492189	0.00167545	0.00464195	0.00421879	0.0090928	0.00780377	-0.000284141	-0.00361305	-0.00486519	-0.00395593	-0.00637774	-0.010234	-0.0131441	-0.0110456	-0.0114709	-0.0193809	-0.0246954	-0.0296367	-0.0353245	-0.0352312	-0.023771	-0.0260018	-0.0416764	-0.0544951	-0.0646185	-0.0723874	-0.0796637	-0.0861241	-0.0952362	-0.105308	-0.112794	-0.123853	-0.132086	-0.138625
		35.914	-0.00902836	-0.0192832	-0.0158329	-0.0125977	-0.0120121	-0.00717746	-0.00339502	0.00711899	0.0145821	0.0223716	0.0215364	0.0211524	0.0183261	0.0169072	0.00880093	0.00325784	-0.00136557	-0.00221613	-0.000939322	-0.00537072	-0.0104261	-0.00615217	-0.00638257	-0.00215277	3.98868e-05	0.00501657	-0.00148077	-0.00574513	-0.00657265	-0.00497712	-0.0183904	-0.0273511	-0.0383067	-0.0491049	-0.0570442	-0.0543792	-0.0518371	-0.0561686	-0.0634282	-0.0657226	-0.0723198	-0.0759698	-0.082302	-0.0883078	-0.0946035	-0.101316	-0.107327
CNO	1	52.076	0.00755647	0.0149107	0.0145292	0.0244505	0.0322235	0.0270979	0.019672	0.0166517	0.0155302	0.0153667	0.0126362	0.00782609	-0.00846848	-0.00645497	-0.00325112	0.00439565	0.00518729	-0.000414417	9.32646e-05	0.0025571	0.000162103	-0.0118387	-0.0132613	-0.0197924	-0.0254658	-0.0289392	-0.0248548	-0.0187454	-0.0170847	-0.0191413	-0.0231339	-0.0268655	-0.0282078	-0.0294211	-0.0212953	-0.0127135	-2.43339e-05	0.0106771	0.014446	0.00406293	-0.00423493	-0.00231033	-0.0142107	-0.0305282	-0.046579	-0.0279956	-0.0298456
		52.489	0.0051856	0.00506488	0.00471093	0.011916	0.0109502	0.00199462	0.00393994	0.000943762	-0.00574002	-0.00633816	-0.012314	-0.0181994	-0.0226525	-0.0247378	-0.0198649	-0.0120561	-0.00984193	-0.0121933	-0.0113894	0.00504293	0.0118941	0.016232	0.0137928	0.011724	0.0144074	0.0123084	0.0136885	0.00938354	0.00553955	0.000304468	-0.00369592	-0.00764693	0.0131343	0.0488387	0.075936	0.0957596	0.097587	0.113912	0.104545	0.106897	0.108395	0.112793	0.114373	0.132164	0.133599	0.118752	0.090884
		45.521	-0.0208224	-0.014329	-0.00868339	-0.00541756	-0.00478941	0.00345051	0.00387438	-0.00401572	-0.00331608	-0.00296626	-0.00462344	0.00117029	0.00750025	0.00796753	0.0167718	0.0168713	0.0159317	0.00690275	0.00267427	0.00316197	0.00362925	0.00639461	0.00910636	0.00801604	-0.000254519	-0.00200362	-0.00158996	-0.00220534	-0.00454173	-0.00863998	-0.0154628	-0.00895916	0.0070151	0.0193482	0.0302462	0.0372554	0.0465626	0.048327	0.0410651	0.0406233	0.0483756	0.0443054	0.0375694	0.0251189	0.0103448	0.00505151	-0.0066815
		60.167	0.00972428	0.00637369	0.0106047	0.00699326	0.00466442	0.00613999	0.00420246	0.00127579	0.00106383	-0.00336286	-0.0105776	-0.00991187	-0.00284383	0.00191439	0.00250135	0.00338723	0.00949058	0.00629216	0.00230841	-0.00258296	-0.00669171	-0.00515637	-0.000993264	-0.0045232	-0.00248513	-0.00449331	-0.00716455	-0.00440364	-0.00264818	-0.00477049	-0.00432755	0.00501497	0.0179581	0.0295751	0.0450889	0.0552303	0.0585157	0.0522575	0.0423633	0.0354774	0.0232815	0.0175613	0.0137515	0.0130966	0.0170613	0.0190369	0.00993624
		76.733	-0.00783183	-0.00135352	0.00216308	0.00592411	0.00663756	0.00429463	0.00323326	-0.00356214	-0.00501326	-0.00230259	-0.00272317	0.00183939	0.00506753	0.00329712	0.00707796	0.0152584	0.0208273	0.0198254	0.00938787	-0.00126324	-0.00400694	-0.00646659	-0.00970134	-0.0120949	-0.0116347	-0.0074685	-0.00166621	-0.00246994	-0.00568928	-0.00627061	-0.00838013	-0.0137993	-0.0162941	-0.0153429	-0.00852987	-0.00162878	0.00387184	0.0125257	0.0176498	0.021543	0.0362898	0.0435917	0.0470906	0.0514704	0.0528885	0.0495855	0.0558767
	2	39.358	-0.0029242	-0.00369073	0.000329404	-0.0110796	-0.0107802	0.0167455	0.011666	0.0272103	0.0228185	0.028365	0.0308324	0.0037804	-0.01256	-0.00751018	-0.00449344	-0.010823	0.0113404	-0.000798996	-0.0169354	-0.014126	-0.0210674	0.00310599	0.00425413	0.0102185	-0.0109217	-0.00924061	-0.00359203	-0.00953012	-0.0099545	-0.000960196	-0.00129576	-0.0113198	-0.00789509	0.00124726	0.0179035	0.0363296	0.0480018	0.0540189	0.0661484	0.0659345	0.0812979	0.0906409	0.0920983	0.0916311	0.0925523	0.0929964	0.12446
		39.309	0.0316768	0.017366	0.000780587	0.00214352	-0.00750138	-0.00225839	0.00354943	0.0168012	0.0216635	0.014941	0.00529914	-0.00481849	2.54486e-05	-0.00181021	0.00149582	0.00299382	-0.0213118	-0.0227423	-0.0247437	-0.0293758	-0.0114858	-0.00914672	-0.0102457	-0.0128426	-1.44571e-05	0.0186768	0.0132496	0.00336832	0.0081171	0.00971946	-0.0135701	-0.0197033	-0.0341062	-0.0298424	-0.0254528	-0.00790965	0.0279656	0.0545827	0.0672972	0.0705603	0.0662443	0.0756007	0.0901878	0.0786857	0.0762453	0.0925821	0.0777372
		38.626	0.0519168	0.0469303	0.04076	0.0389468	0.0278537	0.0218295	0.0119802	0.00700877	-0.00702146	-0.00970763	-0.0158255	-0.018418	-0.0178148	-0.0222805	-0.0228912	-0.0310396	-0.036292	-0.0357675	-0.0342877	-0.028271	-0.0261955	-0.0203436	-0.0113111	-0.00782319	-0.00765835	0.00249812	0.0135312	0.0215335	0.0214436	-0.00176153	-0.00800302	-0.0107192	-0.00929552	-0.0116295	0.000212819	0.0222453	0.0622119	0.0837012	0.0854282	0.109821	0.11211	0.1044	0.0938726	0.0904409	0.108742	0.112114	0.117516
		38.138	0.00609123	-0.00395965	0.0040643	0.00702373	0.00753186	-0.00150835	0.00346963	0.00474553	0.00424578	0.00571711	-0.00292385	0.00407268	0.00572549	-0.000751745	-0.0062881	-0.0118021	-0.019907	-0.0197591	-0.0219424	-0.0183994	-0.0158616	-0.0067739	-0.0107691	-0.00921961	0.00211276	0.0213155	0.0115466	0.00731688	0.0151286	0.0200257	0.0197325	-0.000383212	0.00860674	0.0256849	0.0485227	0.0700372	0.0887318	0.105095	0.112064	0.1159	0.131088	0.13022	0.125761	0.149883	0.163572	0.152133	0.1418
	3	46.295	-0.00583907	-0.00975378	-0.00854056	-0.00801307	-0.0121388	-0.0104772	-0.00354827	-0.00590689	-0.00983667	0.000234574	-0.00271936	0.00939779	0.0150984	0.0149552	0.00757419	0.0083089	0.00917172	0.00388177	-0.0018264	-0.00130644	-0.00508928	0.0070354	0.000769597	-0.00282862	0.00874973	0.0108333	-0.00437341	-0.00109168	0.00371976	0.00130462	-0.00687144	-0.0275942	-0.034719	-0.0402878	-0.0398733	-0.0287509	-0.018804	0.00589753	0.0171066	0.0208292	0.00144026	0.00274391	0.0072803	0.010709	0.0172008	-0.000515212	-0.0143241
		37.369	-0.00388046	0.00744165	0.00798809	-0.00823881	0.000464786	-0.00195701	0.00901538	0.00852578	0.0331809	0.0337535	0.0192577	0.0125519	0.00751597	0.0127311	0.00192486	-0.00228924	-0.00307173	-0.0176287	-0.0200156	-0.00715906	0.00367782	-0.00675688	-0.00530555	-0.00774921	0.00495866	-0.0112988	-0.0118322	-0.0183675	-0.0204002	-0.00947594	-0.00756123	-0.0205401	-0.0377856	-0.0398577	-0.0361987	-0.0166801	-0.00032645	0.0279395	0.0343787	0.0328399	0.0230216	0.0144841	0.000788275	0.00895855	0.0284116	0.0333645	0.0208927
		36.089	-0.0140321	-0.0171559	-0.0206241	-0.0187752	-0.0140723	-0.0144111	-0.0001505	-0.0023641	-0.00948723	0.0128669	0.0249858	0.0250231	0.0247302	0.0167974	0.00914604	-0.000348604	0.0144747	0.00990113	0.000776857	-0.00343788	-0.00144248	0.00115584	-0.00558257	0.00342973	-0.00405803	0.00679176	-0.0034752	0.00995281	-0.00496529	-0.00943842	-0.0192029	-0.0371816	-0.0283703	-0.023699	-0.00544189	0.00245644	0.0149112	0.0186235	0.0148882	-0.00852829	-0.00778756	-0.0170812	0.00385752	0.0211672	0.0272797	0.0259705	0.0377793
		37.641	0.0356203	0.0239288	0.0439417	0.00918469	0.00971051	0.0311703	0.0225384	0.0222843	0.0192811	0.020968	0.0178272	-0.0059123	-0.00380903	0.00474523	0.0268508	0.0259121	0.013123	-0.0149289	-0.0331913	0.00136094	-0.00268328	-0.00952598	-0.0676413	-0.0501587	-0.0348853	-0.0242101	-0.0246794	-0.0308058	-0.0233384	-0.0325879	-0.0470779	-0.054764	-0.0365721	-0.0406799	-0.0444876	-0.0165804	-0.00486419	0.0281953	0.0449827	0.043864	0.0343111	0.0141006	0.000422226	0.00906471	0.0343358	0.0597233	0.071556
	4	42.056	0.0166461	0.014956	0.0148227	0.0134801	0.00939278	0.00889764	0.00858817	0.0041938	0.000961101	-0.00344994	-0.000709999	-0.00328092	-0.0057114	-0.00468541	-0.00399983	-0.00343803	-0.00201212	-0.00100042	-0.00162887	-0.00665883	-0.0115936	-0.0128743	-0.0109223	-0.0113865	-0.00933687	-0.00489727	-0.0071992	-0.00348564	-0.00338566	-0.00620654	-0.0210322	-0.0242673	-0.0229937	-0.0270048	-0.0244482	-0.00954874	-0.0128981	-0.0194682	-0.0199467	-0.0192087	-0.0221558	-0.0336678	-0.0141264	-0.0258408	-0.0410783	-0.0466105	-0.0475508
		54.287	0.00532927	0.00204876	0.00408932	0.00578594	0.0106706	0.0136071	0.00735538	0.0081849	0.00908667	0.0059767	0.00447374	0.00318177	0.00334651	0.00126838	-0.0016595	-0.000725934	0.00100536	-0.000812644	-0.00262198	-0.00401222	-0.00256706	0.000464874	-0.00126642	-0.00581288	-0.00752106	-0.00538801	-0.00543425	-0.0057175	-0.00954716	-0.0126311	-0.0201575	-0.0221865	-0.0175707	-0.0133537	-0.0142468	-0.007865	-0.000919585	-0.000986062	-0.00418853	-0.0040469	-0.00532153	-0.0122265	-0.0107033	-0.00879568	-0.00984776	-0.0150474	-0.0136572
		53.597	0.00185243	0.00271496	0.00401914	0.00670284	0.00565066	0.00155367	0.00347876	0.00401914	0.0036918	0.00286045	0.00434389	0.00352553	0.00251751	0.00179268	0.000623596	-0.000878029	-0.000249321	1.04757e-05	-0.00234328	-0.00505816	0.000997703	0.00387885	0.000696339	0.000142972	-0.00417745	-0.0043619	-0.00661954	-0.00621945	-0.00695987	-0.00844071	-0.00976568	-0.0115531	-0.00485032	-0.00266023	0.000971724	0.00348656	0.00387106	0.00714709	0.00565066	0.00386586	0.0107167	0.0196017	0.0227115	0.0105946	0.0113714	0.0208384	0.0266059
		44.2	0.0010581	-0.000538618	-0.000532667	-0.00187153	-0.000590189	-0.000431508	0.000465036	0.000849836	0.00178407	0.00142704	-0.000572337	-0.00114359	0.00203201	0.0025259	-0.0026689	-0.00217699	-0.000752836	-0.00124078	-0.00132012	-0.000600106	-0.0014669	-0.000911517	0.00131199	0.00124654	0.00206374	0.000653469	-0.000139933	0.00264491	0.00181779	-0.000617958	-0.00230394	-0.00709014	-0.0118307	-0.00336511	0.00496164	0.00286508	-0.000270844	-0.00219881	-0.00160178	0.00587009	-0.0026689	-0.00779428	0.00719309	0.00521752	0.0105611	0.0166009	0.013459
		43.858	0.00106609	0.00418756	0.00335804	0.00500631	0.00619133	0.00276553	0.00264972	0.00216493	0.00287056	0.00236962	5.34305e-05	0.000271583	0.00181481	0.000791379	-0.0012905	-0.000870352	1.30318e-05	0.00175017	0.000285049	-0.0011316	-0.00306804	-0.00268829	-0.00290644	-0.000991548	-0.00150326	-0.000913444	-0.00343971	-0.00302764	-0.0034424	-0.00642651	-0.00590941	-0.00356898	-0.000175495	-0.00393526	-0.00724257	-0.00916285	-0.0163511	-0.0145924	-0.0179347	-0.00735568	0.00134349	0.00561767	0.00989454	0.010075	0.0210042	0.0181278	0.0118471
		38.963	0.00239597	0.00222035	0.000869611	0.00511036	0.00578444	0.00713518	0.0081011	0.0100639	0.0124968	0.00696214	0.0055959	0.0043743	0.00208605	0.000451218	0.000724982	-0.00268157	-0.00594606	-0.00495174	-0.0064781	-0.00437322	-0.0028107	-0.00213146	-0.000788465	-0.00180604	-0.00410204	-0.00606487	-0.0068345	-0.00890064	-0.00864754	-0.0101584	-0.0159565	-0.009474	-0.0106259	-0.00701013	-0.00698172	-0.00690165	-0.00642386	-0.0138516	-0.0119534	-0.00172081	-0.00460566	-0.00794247	-0.0113387	-0.0146807	-0.0200991	-0.0209178	-0.0227748
		50.424	-0.00693801	-0.00263826	-0.00235077	-0.000151718	-0.000852792	-0.00300141	0.000105511	0.000751104	0.00420604	0.0044784	0.00481632	0.00738861	0.00258449	0.00297285	0.00234996	0.00441787	0.00632439	0.00527782	0.000493876	-0.000174414	0.00137904	0.00224656	0.00045857	0.00351001	0.00258197	-0.00185649	-0.00400006	-0.00357891	-0.00704645	-0.00978266	-0.0139714	-0.0135654	-0.0138353	-0.0154291	-0.0142362	-0.0152147	-0.0153383	-0.0115656	-0.000885576	-0.000368597	0.00166149	0.000405611	-0.00177074	0.000332477	-0.00919255	-0.0128265	-0.0101635
	5	44.405	0.00261009	-0.00358182	-0.00443321	-0.00389915	-0.002426	-0.00239246	-0.00315613	0.000424861	-0.0036618	-0.00454672	0.000620939	0.00738818	0.00500171	0.00159616	0.00496817	0.00878394	0.0116632	0.0145321	-0.00111796	-0.00205964	-0.000635503	0.00161164	0.000293283	-0.0086308	-0.00847859	-0.00808901	-0.00861532	-0.00290587	0.00427416	0.000285544	0.00543773	0.0124191	0.00645165	0.0086601	0.0075662	0.00737528	-0.00712669	-0.00360504	-0.00538263	0.000824755	0.0073856	0.00627621	0.00666321	0.00500171	0.00503783	-0.00813545	-0.00485374
		36.735	-1.38934e-05	-0.000421557	0.00369193	0.00035001	0.0017895	-0.00159618	0.0103712	0.010484	0.0114122	0.0157076	0.0165276	0.0125316	0.00328657	0.00301019	0.000677062	-0.00290209	-0.00939016	-0.0111475	-0.00436922	-0.00834451	-0.00831688	-0.00234472	-0.00145569	0.000267095	-0.000619631	-0.00378421	-0.00396616	-0.00618873	-0.0104796	-0.0175849	-0.0162629	-0.0159036	-0.018315	-0.0274725	-0.0302063	-0.0229951	-0.0164725	-0.0219725	-0.0238196	-0.0258579	-0.0299576	-0.0305587	-0.0342346	-0.0365309	-0.0415841	-0.0452208	-0.0463793
		36.743	0.00282903	0.00270659	0.00172283	0.00226115	0.0020986	0.00243215	0.00306124	0.00892577	0.00491476	0.00514064	0.00194238	0.00277414	0.00458121	-0.000641559	-0.00472646	-0.00182798	-0.00364771	-0.00733362	-0.0121257	-0.0108507	-0.0105551	-0.00590444	-0.00408259	-0.00361393	0.000975515	0.00472898	0.00383389	0.0020226	0.00453899	0.00549952	-0.0016802	-0.00218686	0.000470971	-0.00138887	0.00300847	0.00241104	0.00429833	0.00694349	0.00517019	0.00436799	0.00257148	0.00211971	0.000861518	-0.00336694	-0.00701063	-0.0109077	-0.012968
	6	39.911	0.00926777	0.0134976	0.0154785	0.0197774	0.0189278	0.0201321	0.020213	0.0205382	0.0160836	0.012522	0.0126008	0.00380404	-0.00244612	-0.00528048	-0.00585405	-0.00514842	-0.0043265	-0.00356173	-0.0106023	-0.0110162	-0.00921665	-0.0114025	-0.0134623	-0.0134406	-0.014777	-0.0165982	-0.0169825	-0.0171245	-0.014978	-0.0171915	-0.0127428	-0.014635	-0.0213405	-0.0264593	-0.0286412	-0.0202683	-0.0068238	0.0238732	0.0284007	0.0381001	0.0249691	0.00140529	-0.00643157	-0.00856817	-0.00904517	-0.0126502	-0.0201559
		73.422	0.00174508	-0.0006409	-0.00507097	-0.00659982	-0.00749306	-0.0085452	-0.0115138	-0.0117955	-0.013765	-0.00996571	-0.0108132	-0.0100668	-0.000513294	0.0059079	0.0104102	0.0160489	0.0192968	0.0154566	0.00956029	0.00853705	0.00675539	0.00424421	0.00309577	0.000206592	-0.000176224	-0.00277407	0.000372719	-0.0011128	-0.000677014	-0.000973155	-0.00220587	-0.00484224	-0.00527562	-0.00984774	-0.00282463	0.0167736	0.0190585	0.0160658	0.0137014	0.0107665	0.0114214	0.00951936	0.00767752	0.00490632	0.00245774	0.00431163	0.00280444
		36.564	-0.0176449	-0.0211616	-0.0212071	-0.023431	-0.00742281	0.0171605	0.0163681	0.00852795	0.00550442	0.00462824	0.00449897	0.00637581	0.00799411	0.00116422	0.00638778	0.00904265	0.00603108	0.00855907	0.00833883	0.0104048	0.00864526	0.00245934	-0.00159598	-0.00199337	-0.000185954	0.00189437	-0.0014284	0.00100862	-0.0075449	-0.0111645	-0.0202136	-0.0102979	-0.017597	-0.0204554	-0.0092781	0.0107232	0.0215102	0.0109003	-0.0121412	-0.0227799	-0.0244054	-0.0287815	-0.02921	-0.0251211	-0.0272541	-0.0292387	-0.0315536
		38.648	0.0219368	0.0228028	0.0252499	0.0257322	0.0249354	0.0229202	0.021899	0.0160885	0.0131088	0.0105505	0.0091456	0.00741354	0.00693545	0.00150024	-0.00301232	-0.00706146	-0.0108149	-0.0149543	-0.0130565	-0.0158664	-0.0159713	-0.0158538	-0.0177243	-0.0163403	-0.0163529	-0.0196451	-0.0209389	-0.0199177	-0.0204356	-0.0209451	-0.0207124	-0.0198443	-0.0209955	-0.0167241	-0.0108695	0.00247531	0.0124839	0.0313247	0.0352124	0.0217061	0.0182504	0.0208778	0.0174158	0.011903	0.00560181	0.000638409	-0.00422643
		38.741	-0.00939087	-0.0129882	-0.0160817	-0.0161	-0.0153021	-0.0148028	-0.00936579	0.00461546	0.00547946	0.00599239	0.00350298	0.00668313	0.0149812	0.0198528	0.0211408	0.017523	0.0167091	0.0147167	0.0141719	0.0093116	0.0034893	0.000598672	-0.00418865	-0.00382618	-0.00620844	-0.00965303	-0.00868417	-0.0114289	-0.00695618	-0.00479048	-0.00348879	0.0065737	0.00918621	0.0178877	0.0227093	0.0303712	0.0375135	0.0444665	0.0499514	0.0375568	0.0276242	0.0217244	0.0156651	0.0102235	0.00843392	0.00628647	4.01517e-05
[truncated: 314 more columns]

## Sheet: Figure 1j-n
Treatment	Mouse#	latency to drinking onset (s)	dF/F
			time (s), water bowl presented at 30s
			1	2	3	4	5	6	7	8	9	10	11	12	13	14	15	16	17	18	19	20	21	22	23	24	25	26	27	28	29	30	31	32	33	34	35	36	37	38	39	40	41	42	43	44	45	46	47
Saline	1	46.891	-0.0114129	-0.00941333	-0.00301513	0.00232152	0.00570061	0.00323593	0.000684531	0.00120742	-0.00387961	-0.00240552	-0.00200087	0.0023951	0.00552457	0.0108875	0.0112921	0.010856	0.00735337	0.00658349	-0.000174693	-0.00593964	-0.00588709	-0.00438936	-0.00507253	-0.00347758	0.000771242	-0.000639778	0.000639862	0.00898774	0.00232152	-0.00353802	-0.0133258	-0.0200025	-0.0222018	-0.0242251	-0.030505	-0.0359232	-0.0377966	-0.0439978	-0.0478051	-0.0473453	-0.0504748	-0.0528633	-0.0582893	-0.0592326	-0.0573407	-0.0492661	-0.0560059
		39.177	0.00255361	0.00500278	0.00361029	0.00134905	0.00342237	0.00427573	0.00338232	0.00106871	0.000434082	-0.000336096	-0.000169737	0.00029545	-0.00212599	-0.00366018	-0.00334903	-0.00240941	-0.00351847	-0.00300091	-0.000946076	-0.00369407	-0.000915269	0.00429729	0.00227019	0.00842545	0.0061334	-0.00204897	-0.00339832	-0.00316727	-0.00651292	-0.0102837	-0.00729234	2.43476e-05	0.00260598	0.00323445	0.00270765	0.00324369	0.00572982	0.00792945	0.0113891	0.00411553	-0.00231699	-0.00346302	-0.000105042	-0.000453163	-0.00335211	-0.00619561	-0.00728926
		39.597	0.009734	0.00672989	0.00849973	0.00660019	0.00691399	0.00273836	0.00385549	0.00580523	0.00178022	-0.00183475	-0.00279289	-0.004751	-0.00483886	-0.00347069	-0.0017176	-0.00301464	-0.00137451	-0.000914271	0.000512472	0.00351658	0.00110242	0.00029072	0.000127544	-0.000110943	0.00196014	-0.00401461	-0.00495601	-0.0079936	-0.0113115	-0.0148261	-0.0122571	-0.00850823	-0.00873416	-0.00957515	-0.00604385	-0.0100145	-0.00967975	-0.00746641	-0.012801	-0.00985966	-0.0123408	-0.0171314	-0.0191314	-0.0232275	-0.0269555	-0.0285454	-0.0309177
	2	41.087	-0.0188166	-0.0173645	-0.0160887	-0.0207133	-0.019569	-0.017646	-0.0209159	-0.0178959	-0.0135869	-0.0107853	-0.00804154	-0.00438757	-0.00573183	0.00419358	0.00777126	0.00712938	0.0123933	0.0101204	0.00758974	0.01268	0.0199301	0.0219767	0.0125406	0.0111753	0.0108728	0.0144136	0.0137007	0.0111885	0.00772391	0.00535107	0.000792163	-0.0058923	-0.012098	-0.0150127	-0.0103854	-0.00968043	-0.00937264	-0.00163329	-0.0105143	-0.0253643	-0.031428	-0.0287684	-0.0328485	-0.0208843	-0.0180617	-0.0272294	-0.0376784
		40.886	0.00325716	0.00280275	0.00159419	0.00310247	0.00193501	0.000653943	0.000460575	-0.000670629	-0.00178249	-0.00302005	-0.00331494	-0.00263573	-0.00165197	-0.00143685	-0.00255113	-0.0020097	-0.00289678	-0.00276384	-0.00225866	-0.00331252	-0.00227558	-0.00179941	-0.00129666	-0.000786649	0.00195434	0.00175372	0.00391461	0.00408381	0.0034892	0.00419258	0.00667011	0.00583621	0.0072913	0.00644048	0.00712452	0.00924674	0.0120602	0.0120119	0.0102982	0.00784482	0.00555341	0.00226131	0.00213804	-0.00126524	-0.00255113	-0.00383703	-0.00542023
		33.533	0.00470828	0.00171708	0.000753495	0.00081627	0.000998315	-0.00152522	-0.00188303	-0.000583599	-0.000787616	-0.00110149	9.75028e-05	-0.00170098	-0.00344297	-0.00236639	-0.00107638	-0.00102616	-0.00102302	-0.00144989	-0.000388999	-0.00177004	-0.00041097	-0.00162879	-0.00048316	0.000263855	0.00225694	0.00074094	-1.86298e-05	0.000599698	0.00102656	0.00334608	0.00630275	0.00767123	0.00646596	0.00715648	0.00747663	0.00334294	0.0019776	-0.000523964	-0.000922581	0.000797437	-0.0019458	-0.00249508	-0.00343356	-0.0033394	-0.00360932	-0.00492131	-0.00444736
	3	36.872	-0.00886306	-0.00956276	-0.0115231	-0.0133615	-0.0130273	-0.0140612	-0.0122992	-0.0121689	-0.00864494	-0.00602461	-0.00239581	-0.0012372	0.0022443	0.00855858	0.0123375	0.0119041	0.0083008	0.00603174	0.00787588	0.00524422	0.00404595	0.00850759	0.00727533	0.00847927	0.00785605	0.00803735	0.00477398	0.00021319	0.000275512	0.00217915	-0.000970915	-0.00237315	-0.00418046	-0.00756565	-0.0159025	-0.0197523	-0.0238428	-0.0291685	-0.0170583	-0.00905286	-0.0151604	-0.0201234	-0.0258966	-0.0279532	-0.0323129	-0.0349389	-0.0389643
		34.146	-0.00423944	0.000979355	0.00121969	-0.000863246	0.00309377	0.00671316	0.0140807	0.0104728	0.00630973	0.00406371	0.000650319	-0.00019373	-0.000127922	-0.00154993	-0.00334961	-0.0050234	-0.00237109	-0.000806022	0.00184057	0.00638985	0.00484481	0.00104802	-0.0010807	-0.00208211	-0.00207639	-0.00211358	-0.00523227	-0.00643969	-0.00720362	-0.0103366	-0.0118187	-0.0122193	-0.0110634	-0.00853121	-0.0134725	-0.00940959	-0.00929228	-0.0135583	-0.0132693	-0.0150232	-0.02185	-0.0223421	-0.023026	-0.0241733	-0.0259043	-0.0296095	-0.0299271
		33.711	0.00134808	-0.00102507	0.00667501	0.00999281	0.00437558	0.00228352	-4.81617e-05	0.000408037	0.000569319	-0.0010988	-0.00598796	-0.0117711	-0.0129093	-0.0174114	-0.0189643	-0.013218	-0.00596031	-0.00209875	0.000928748	0.00326965	0.00790536	0.0108407	0.0146055	0.0196605	0.0175593	0.0148267	0.00543083	-0.000518184	-0.00681741	-0.0105269	-0.0123241	-0.0172869	-0.0211393	-0.0256736	-0.0289039	-0.0368758	-0.040636	-0.0465021	-0.0472624	-0.0546077	-0.0562896	-0.0574923	-0.05893	-0.0597457	-0.0618055	-0.0627409	-0.0647132
	4	43.465	0.00604624	0.00120849	-0.00143186	-0.00369847	-0.00432482	-0.00504114	-0.00498231	-0.0044494	0.000914349	-0.0013315	-0.00173638	0.00244042	0.00707401	0.0120087	0.01513	0.0185074	0.0118772	0.00310483	0.00463437	0.000948953	-0.00350123	-0.00462934	-0.00567787	-0.00922486	-0.00959513	-0.00861236	-0.00977162	-0.0104187	-0.00630422	0.000426421	0.0031775	0.00643382	0.00923681	0.00711553	0.00768305	0.00557216	0.013071	0.0241757	0.0254872	0.0153515	0.00888384	0.00216704	-0.00162218	-0.00606544	-0.00497885	-0.00388188	-0.00160142
		40.098	-0.00382954	-0.00202998	0.000452062	-0.00174536	0.0010917	-0.000585439	0.00102437	0.00303204	0.00556918	0.00496014	0.00199148	-0.00198714	-0.00265126	-0.00359389	-0.00322357	-0.00256557	0.000406155	0.00113149	0.000908073	0.00197618	0.000880528	0.00208023	0.00469388	0.00434193	0.00184458	-0.00170251	-0.0041662	0.000302099	0.00176501	-0.00206059	-0.00831008	-0.0117439	-0.0103881	-0.0130661	-0.0117715	-0.00973932	-0.00957712	-0.0112634	-0.011294	-0.00539039	-0.010431	-0.0134547	-0.0161633	-0.0202153	-0.0240838	-0.0267954	-0.0288734
	5	50.307	0.00350154	0.000944601	0.00409376	0.0030779	0.00603686	0.00978472	0.0138244	0.0142178	0.0138525	0.0108265	0.00763197	0.005637	0.00451091	-0.00459506	-0.00372834	-0.00248338	-0.00935879	-0.00743298	-0.00397907	-0.0028854	0.000484223	-0.00335658	-0.00437028	-0.00287459	-0.00418224	-0.00395745	-0.0035684	-0.00502302	-0.00997479	-0.0102428	-0.0164114	-0.0250808	-0.0219641	-0.0135087	-0.0104633	-0.00848774	-0.00276004	6.49117e-05	0.00573858	0.00503397	0.00717591	0.010699	0.0127804	0.00791944	-0.000155551	-0.00963329	-0.0157652
		40.112	0.0164904	0.0136883	0.0142767	0.0169181	0.0183672	0.0117675	0.00668433	0.0109406	0.00324195	-0.000866615	0.000577214	-0.00204605	-0.00628681	-0.00399794	0.00174887	-0.00248412	-0.00326436	-0.00607425	-0.00699706	-0.0051333	-0.00484039	-0.00594205	-0.00755696	-0.00839164	-0.00574764	-0.00366614	-0.0068856	-0.0074455	-0.0091641	-0.00828795	-0.00962291	-0.0120414	-0.00765546	-0.00671192	-0.00348987	-0.00410162	-0.00671192	-0.00668859	-0.00244524	-0.00514108	-0.00760103	-0.00966438	-0.0142784	-0.018654	-0.0208703	-0.0243956	-0.0265004
		50.354	0.00332981	0.00402106	-0.00141932	-0.00421631	-0.00359547	-0.00318797	0.000850708	0.0103852	0.00778665	0.00484458	0.00572571	0.00544623	0.00375651	0.00568731	0.00652577	0.0026343	0.00178517	-0.0011633	-0.00221937	-0.000484851	-0.00135744	-0.00182041	-0.00371707	-0.0016732	-0.00349519	-0.00333518	-0.00255219	-0.00489476	-0.00673382	-0.00658234	-0.0103309	-0.0114424	-0.0109688	-0.00684476	-0.00567561	-0.00428458	-0.00276127	-0.00139585	0.00128807	0.00276871	0.000929647	0.00207106	0.00681592	0.0107159	0.011021	0.012028	0.00766718
CNO	1	38.604	0.0125443	0.0104803	0.0106682	0.0128634	0.0126397	0.00793904	0.00759006	0.00814484	0.0111514	0.00829696	0.00199157	-0.00431084	0.000589705	-0.000603368	0.000971489	0.00171716	-0.00329077	-0.00356219	-0.00855222	-0.0114663	-0.015472	-0.013071	-0.00852239	-0.00518179	-0.00675664	-0.0080392	-0.00674471	-0.00552778	-0.002906	-0.00620783	-0.0139151	-0.00301636	-9.33291e-05	-0.00209173	-0.00582903	-0.00560831	-0.0048179	-0.00110744	0.0021407	0.0116167	0.00397207	0.00378416	-0.000877775	-0.00485667	-0.0102911	-0.0130799	-0.0138912
		37.773	-0.00298284	-0.0015714	-0.000755898	-0.00467373	-0.00632184	-0.00688642	-0.00682369	-0.00893943	-0.00761923	-0.00901356	-0.00816955	-0.00873413	-0.00517272	-0.00250381	-0.0029971	0.00128571	0.00852827	0.0105271	0.0157594	0.0129708	0.00514366	0.00220386	0.00450779	0.00516362	0.0080692	0.00398599	0.00120587	0.00473305	0.00317334	-0.000938388	-0.00232702	0.00234643	0.00423691	0.00180751	-0.00190216	0.000532937	0.00175904	0.00265153	0.00659502	0.00414281	-0.00125489	-0.00403216	-0.00528678	-0.00849461	-0.0131167	-0.0134846	-0.0147648
	2	39.471	-0.00589184	-0.00418928	-0.00307	-0.00497488	-0.00351666	-0.00591023	-0.0049959	0.00103927	0.00487529	0.00405554	0.00342233	-2.22059e-05	-0.00245519	-0.00229754	-0.00316984	-0.00532169	0.000886878	0.00165671	-0.000602864	-0.0012965	-0.0023028	-0.00238688	-0.00493021	-0.000952309	0.00170663	0.00462831	0.00754474	0.00522999	0.0106766	0.0145836	0.0157055	0.0161889	0.00967294	0.0034197	0.0026236	0.00216643	0.00390315	0.00373499	1.72053e-05	0.0038033	0.00622315	0.0151406	0.0123293	0.00227415	-0.00397383	-0.00819608	-0.0137189
		36.407	-4.26013e-05	-0.00151948	-0.000528997	-0.0010036	-0.000537841	-0.000720608	1.61657e-06	-0.00143104	-0.00217685	-0.000649859	-0.00160791	-0.00108025	-0.00249522	-0.00303467	-0.0032764	-0.00329998	-0.00190859	-0.0034061	-0.00239499	-0.00253059	-0.00296982	7.82608e-05	-0.00136029	-0.000862105	0.00191772	0.00280208	0.00394879	0.00706762	0.00798735	0.00721796	0.00781638	0.00796377	0.00726513	0.00890119	0.011401	0.0124534	0.012418	0.00859166	0.00537556	0.00246602	0.000965565	-0.00182311	-0.00135145	-0.00277821	-0.00451744	-0.00514534	-0.00518956
		33.936	-0.00245202	-0.00082156	-0.00147985	-0.00313211	-0.00345907	-0.000586145	-0.000568707	-0.000437921	0.00037731	-0.000124036	0.000202929	-0.00224276	-0.00110929	-0.000782324	-0.000856436	-0.00312775	-0.00186785	-0.00261332	-0.00165859	0.0019293	0.00212112	-0.000224305	0.000983284	0.000961486	-0.000119676	0.00111407	0.00249168	0.00397392	0.00329383	0.00414394	0.00607085	0.00897429	0.00987672	0.0083596	0.00572645	0.00342898	-0.000603583	-0.000350731	-0.00175886	-0.00275719	-0.0031757	-0.00448356	-0.0050285	-0.00366397	-0.00421327	-0.0054383	-0.00748727
	3	36.962	0.00733091	0.00680338	0.00796615	0.00796615	0.00636147	0.00365476	0.00264113	0.000506148	0.00155569	-0.00156807	-0.000894156	-0.00210113	-0.00403725	-0.00527183	-0.00468354	-0.00639318	-0.00646776	-0.00683786	-0.0038301	-0.00253199	-0.00210389	0.00540307	0.00215227	-0.00133883	-0.00198236	-0.000910728	-0.00385496	-0.0016316	-0.00126426	-0.000861013	-0.000990824	-0.000405293	0.000749199	-0.00561708	-0.00932913	-0.00440735	0.00759882	0.015962	0.0396373	0.0957931	0.1043	0.0902803	0.0924457	0.091142	0.0807903	0.0736921	0.0605673
		35.575	0.000309322	0.000130557	-0.00132102	-0.00236144	-0.00185017	-0.00189665	-3.74831e-05	-0.00153911	-0.000630985	-0.000702491	-0.000201948	-0.00186447	1.84532e-06	-0.00063456	-0.00256523	-0.00408474	-0.000319933	0.000899249	0.00106014	-0.00148906	0.00168224	0.000977906	0.00330901	0.00440663	0.00305874	-0.000924161	-0.00101354	0.00114595	0.00184313	0.00324108	0.0043387	0.00911532	0.00584748	0.00864695	0.0128086	0.0142566	0.0122759	0.0319937	0.0380539	0.0262268	0.0220436	0.0153435	0.00725258	0.0017323	0.000734784	-0.000641711	-0.00389525
		34.274	0.000216023	0.00169565	0.00150527	0.00257073	0.00181589	0.00373305	0.00278783	0.00242711	0.000175943	-0.00216206	-0.00259626	-0.00177796	-0.00128698	-0.000795999	-0.00287014	-0.0032676	-0.00287682	-0.00114336	-0.00316406	-0.0028835	-0.00102312	-0.00154082	0.00103432	0.00181589	0.00264421	0.00428081	0.00320867	0.00136499	8.57627e-05	-0.00142058	-0.00255284	-0.00439319	-0.00524155	-0.00610661	-0.00770981	-0.0103551	-0.0149877	-0.0144032	-0.0142796	-0.0170618	-0.0182242	-0.017506	-0.0198808	-0.0204453	-0.0227499	-0.0232542	-0.0256991
		36.926	0.00816526	0.0107302	0.0105802	0.00977886	0.00602843	0.00235118	-0.00158586	-0.00333485	-0.00301286	-0.000674783	0.000781483	-0.00291041	0.000324113	-0.00151634	0.00557106	0.00702733	0.00448435	0.000796119	-0.000608922	-0.00153098	-0.00599125	-0.00622542	-0.00598759	-0.0063169	-0.0056034	-0.00586685	-0.00415811	-0.00228838	0.000902229	-0.00458987	-0.005318	-0.00350316	-0.00643399	-0.00546436	-0.00301286	0.000408269	-0.00359463	-0.00612297	-0.00966119	-0.0116992	-0.0124932	-0.0165364	-0.0173889	-0.0194123	-0.0209308	-0.0235579	-0.0243958
	4	42.661	0.000120379	-0.000731701	-0.00442173	-0.00434522	-0.00144467	0.00127851	0.00203669	0.00154283	0.00101072	-0.000773435	-0.00316969	-0.00323229	-0.00555899	-0.00231761	-0.00370529	-0.00113513	0.00038122	0.000419477	0.000231672	0.000826389	0.00432861	0.00369216	0.00307658	0.00373389	0.00117418	-0.000498683	0.00072553	0.00330959	0.00196365	0.00274965	0.00352174	0.00716656	0.00423123	0.00185932	0.00363304	0.00408168	0.00520504	0.00830035	0.0064362	0.00748652	0.0105053	0.014331	0.0131624	0.00542414	0.00380345	0.00689181	0.0072709
		37.4	-0.00519999	-0.00277003	0.000791664	0.00182713	0.000851502	-0.000725111	-0.00171895	0.00112208	0.00108045	0.00393188	0.00531858	0.00253999	0.00495434	0.00673909	0.00169705	0.00449905	0.00433774	0.00443401	0.000942561	-0.00118821	-0.000371284	-0.0019505	-0.00355833	0.000260923	-0.00254888	-0.00470567	-0.0011752	-0.00377948	-0.00275442	-0.00585041	-0.00703157	-0.012966	-0.0109757	-0.0134135	-0.0139598	-0.011738	-0.0122843	-0.00869664	-0.00885794	-0.0105568	-0.0126746	-0.0144932	-0.0157186	-0.0165147	-0.0170558	-0.0173134	-0.0183124
	5	49.893	0.0118058	0.0144813	0.0107794	0.00720192	0.0124254	0.0123343	0.0127716	0.00911516	0.0111286	0.00850778	0.00499714	-0.00241285	-0.0056441	-0.00681634	-0.00654605	-0.00596905	-0.00165667	-0.000900485	-0.00227619	-0.00155645	0.00233076	0.00145917	-0.000344735	-0.00220331	-0.00406492	-0.00626666	-0.00943413	-0.0114263	-0.0166558	-0.017412	-0.0177522	-0.0164797	-0.0153014	-0.0122311	-0.0132029	-0.0119487	-0.0150372	-0.0153044	-0.0101751	-0.00186318	0.000207978	-0.000706125	0.00241883	0.0105273	0.0211078	0.0140106	0.00694075
		40.893	-0.000583409	-0.00419434	-0.00474891	-0.0122894	-0.016666	-0.0153665	-0.00890199	-0.00982697	-0.00823568	-0.00488134	0.00182733	0.00326549	0.00530375	0.0104232	0.00705231	0.00479056	-0.00139044	0.000182232	-0.00354458	-0.0020133	0.00613975	0.00688676	0.0131091	0.0149322	0.0106736	0.00129758	0.00218738	0.00575693	0.00524374	-0.00172359	-0.00470545	-0.0100567	-0.00905926	-0.0043723	-0.00564078	-0.00105728	0.00474711	0.0118138	0.0214919	0.0284137	0.0258705	0.0171257	0.0051113	0.00601352	-0.00121455	-0.0113086	-0.0210281
		43.191	0.0047635	0.00553423	0.00481546	0.00722725	0.00636126	0.00777715	0.00882933	0.00869077	0.00624002	0.0046834	0.00282152	0.00481546	0.00685703	0.00423525	0.00143161	-0.000239754	-0.00261906	-0.00342443	-0.00382495	-0.00545951	-0.00807263	-0.00649004	-0.00642942	-0.00709839	-0.00952533	-0.0102289	-0.00467362	-0.00416702	-0.00750541	-0.00938244	-0.0110343	-0.0137102	-0.015702	-0.0105255	-0.00953399	-0.00623024	-0.00307154	-0.000131505	0.00468556	0.00753684	0.00475917	0.00752818	0.0168419	0.011988	0.00637208	0.00956325	0.00719261
[truncated: 314 more columns]

## Sheet: Figure 1f
pre-ingestive			post-ingestive
Saline	CNO		Saline	CNO
-0.0011294	0.022		-0.18	-0.1221
-0.0249	0.0028535		-0.3121	-0.1617
-0.0239	-0.0089529		-0.2874	-0.1175
-0.0368	-0.0046558		-0.1839	-0.0601
-0.0050869	-0.0060255		-0.1101	-0.0712
-0.0197	-0.00081018		-0.1946	-0.103

## Sheet: Figure 1g
Latency			drinking bout
Saline	CNO		Saline	CNO
13.0686	27.3972		7.5714	4.7143
8.264	8.8578		16.2857	17.5714
6.3318	9.3485		17.2857	15.1429
10.042	16.7693		12.7143	7.4286
6.233	9.2943		2.8571	3.2857
5.9526	15.4572		5.2857	5

## Sheet: Figure 1h
Saline	CNO
-0.0784	-0.122
-0.0535	-0.2545
0.0208	-0.2303
-0.0361	-0.1692
-0.0662	-0.1057
-0.0575	-0.1497

## Sheet: Figure 1n
pre-ingestive			post-ingestive
Saline	CNO		Saline	CNO
-0.0153	-0.00056789		-0.1039	-0.0562
0.00091517	0.0074888		-0.0669	-0.0521
-0.0097848	-0.00089673		-0.0869	-0.0697
-0.00046331	-0.0027762		-0.0319	-0.0389
-0.0044675	-0.0018608		-0.063	-0.0787

## Sheet: Figure 1o
Latency			drinking bout
Saline	CNO		Saline	CNO
11.8883	8.1885		13	10.5
8.502	6.6047		12.3333	6.6667
4.9097	5.9343		8.6667	9.75
11.7815	10.0305		9.5	8.5
16.9243	14.659		11.3333	9.3333

## Sheet: Figure 1p
Saline	CNO
-0.0921	-0.0494
-0.1022	-0.1022
-0.1031	-0.121
