# Supplementary material for: Neural basis for regulation of vasopressin secretion by anticipated disturbances in osmolality
Source: eLife. 2021 Sep 29;10:e66609. doi: 10.7554/eLife.66609 (PMC8601670; doi:10.7554/eLife.66609)
Supplement: Figure 5—source data 1. [file elife-66609-fig5-data1.xlsx]

## Sheet: Figure 5b-g
Treatment	Mouse#	latency to drinking onset (s)	dF/F
			time (s), water bowl presented at 30s
			1	2	3	4	5	6	7	8	9	10	11	12	13	14	15	16	17	18	19	20	21	22	23	24	25	26	27	28	29	30	31	32	33	34	35	36	37	38	39	40	41	42	43	44	45	46	47
Saline	1	42.33	0.0378938	0.0692556	0.0389602	0.0481921	-0.0281535	0.00727931	-0.0158703	-0.0509918	-0.0319521	-0.01408	-0.0165787	-0.0353304	0.0366017	0.0372478	-0.0012364	0.0189398	0.0199205	-0.0328628	0.00145687	0.0169081	0.0101205	0.0124401	0.0191888	0.0109845	-0.01826	-0.0419701	0.000577272	-0.00897371	-0.0385607	-0.059056	-0.0812872	-0.0780802	-0.0889622	-0.117693	-0.0826883	-0.016929	-0.0168511	-0.0243316	-0.0657736	-0.0287762	-0.0213269	-0.0274841	-0.0309558	-0.0209689	-0.0280134	-0.0296013	-0.0134339
		41.828	0.0124541	0.00287118	0.0250032	0.0085017	-0.0205783	-0.00183197	0.0157294	0.033806	0.00972349	0.041328	0.0473119	0.0434698	0.00663222	-0.00299487	7.43139e-05	-0.0159561	-0.0438732	-0.0484071	-0.0214689	-0.0405244	-0.0308531	-0.0293737	-0.00617447	0.000699928	0.0128368	0.00786137	0.0130871	-0.00192029	0.0168334	-0.000367296	-0.0339002	-0.0386328	-0.0614861	-0.0429385	-0.0419081	-0.0388462	-0.0147932	-0.0163757	-0.0271877	-0.0574233	-0.0353943	-0.0200263	-0.0193344	0.0114016	0.010695	0.0129325	0.0113574
		35.998	0.00417636	0.0273588	0.0385518	-0.0248933	0.0260077	0.0279224	-0.00639932	-0.0215471	-0.00206884	-0.00861825	-0.00832299	-0.00409093	0.0142868	-0.0116603	-0.0297965	-0.0099156	-0.0255197	-0.0243118	-0.0162234	-0.0168229	-0.00174674	0.048018	0.0104395	0.0209704	0.0133294	0.028164	0.00372899	-0.016984	-0.0309059	-0.0172076	0.014081	0.000677973	-0.0147919	-0.0278012	-0.034798	-0.0436826	-0.0479236	-0.0521915	-0.0346638	-0.0586783	-0.0707303	-0.0547594	-0.0501873	-0.0577388	-0.0888664	-0.0973842	-0.110071
		37.565	-0.00141547	-0.00630038	-0.0273031	-0.0324177	-0.0124549	0.0515689	0.0751349	0.0227914	-0.0033259	0.0293812	0.0637207	0.0146177	0.0025505	-0.0043174	-0.0383062	-0.0253685	-0.0118987	-0.0262995	-0.0565037	-0.0575436	-0.037484	-0.0480035	-0.065282	-0.0115238	0.00835435	-0.00551444	0.0362854	0.0334923	0.0508918	0.0310257	0.051448	-0.0347272	-0.0168924	-0.0147885	-0.0472175	-0.0427196	-0.0461777	-0.0195646	-0.0737944	-0.0769744	-0.0936846	-0.0571566	-0.0384876	-0.0521871	-0.0794289	-0.089235	-0.0347755
		37.52	0.0588874	0.0845792	0.0582397	0.0700426	0.0772331	0.0793709	0.0131399	-0.00341787	-0.0018502	-0.00506328	-0.0336312	-0.0431927	-0.00573699	0.0182316	-0.00411749	-0.0458098	-0.0337478	-0.0278269	-0.0121891	0.00386339	-0.00393611	-0.0119818	-0.0183561	-0.00700668	-0.00898894	-0.0212842	-0.02017	-0.0317267	-0.0633263	-0.0227223	-0.0375051	-0.0553066	-0.0653993	-0.0696618	-0.0648681	-0.0423636	-0.0272828	-0.0484917	-0.0588047	-0.0594784	-0.0169828	-0.045175	-0.0670188	-0.0590897	-0.070206	-0.0644017	-0.0569261
		37.491	-0.0446412	-0.0108416	-0.0213844	-0.00709013	-0.0312878	-0.017259	0.00575662	0.0136335	-0.0307691	-0.0382963	-0.027283	-0.0202264	0.0131028	-0.0266678	0.001788	0.0341039	-0.0162095	-0.0148947	-0.012265	-0.0352926	-0.0401177	-0.00220474	0.00130549	0.0309193	0.0501231	0.0526804	0.0265768	0.039713	0.0531267	0.0342125	0.0396889	0.0243211	-0.00692125	-0.0236522	-0.000805475	-0.0120479	-0.0206003	0.040087	0.0309797	-0.0019273	-0.0434711	-0.0519391	-0.0766676	-0.0858352	-0.0768365	-0.0764505	-0.0685132
	2	45.631	-0.00932798	-0.00757644	-0.0106991	-0.00673611	0.00110604	-0.0010606	-0.00379277	-0.00993834	-0.00585383	-0.0039186	-0.00128045	-0.000782899	-0.0021121	-0.00456512	-0.00513354	0.00370515	0.00783016	0.00914201	0.00043638	0.0090075	0.0114316	0.0074382	0.00452089	0.00768119	0.0033479	0.00275345	0.00351857	0.00637512	0.00682928	-0.00116185	-0.0111837	-0.0265758	-0.033945	-0.0236484	-0.0170993	-0.00894036	-0.00874944	-0.0137857	-0.0144597	-0.0110969	-0.00705865	-0.00882754	-0.00172737	-0.00966932	-0.0148719	-0.021852	-0.00344998
		39.653	0.0150608	0.0157648	0.00837765	0.0201752	0.0110211	-0.000550879	0.00646466	0.00178033	-0.002946	-0.0035578	-0.00501788	-0.00840192	-0.0045248	-0.00981179	0.000552175	-0.00336878	0.00427864	-0.0035925	-0.00149048	-0.00603054	-0.00390479	-0.00948306	-0.00707881	-0.0093954	0.00215106	-0.00662042	-0.00131425	0.00287699	-0.00179912	-0.00991406	-0.00243466	-0.00516124	-0.0144979	-0.0142286	-0.00725595	-0.0154111	-0.0175304	-0.0110892	-0.0120115	-0.0180701	-0.0266032	-0.0246848	-0.014119	-0.00857907	-0.00785496	-0.00757829	-0.0134734
		46.152	0.00460023	0.000916818	0.00178422	-0.00313348	-0.00314928	0.00332464	0.00153032	-0.000774249	0.00106381	0.00211952	0.00395394	0.00191542	0.00278161	-0.0013428	-0.00194779	-0.00187004	-0.00175099	0.000330046	-0.0007293	0.000788044	0.00563771	0.0019713	-0.00424385	0.000428449	-0.00234019	-0.00386725	-0.00480997	0.0034109	-0.0029221	0.00133958	0.00503879	0.00137967	-0.0063346	0.00227137	-0.000220279	-0.000407366	-0.00208871	-0.000963766	-0.000752382	-0.000120662	-0.00472736	-0.00846545	-0.0173861	-0.0152917	-0.019099	-0.0198546	-0.0164166
		39.696	-0.00532444	-0.00542404	-0.00245963	-0.00464368	-0.00396527	2.32073e-05	0.00626252	0.0066902	0.0017503	0.0082509	0.00967804	0.00566378	0.00714013	0.00348207	-0.000242769	-0.00219365	0.000886752	0.000209508	0.0026279	0.00783026	0.00736861	0.00340005	0.001721	-0.000409151	-0.00453823	-0.00683477	-0.00812013	-0.00919106	-0.0105268	-0.00103484	-0.00434373	-0.0145082	-0.0276477	-0.0201769	-0.0114243	-0.00266116	-0.001575	-0.00666019	-0.00193939	-0.0105842	-0.0121953	-0.0100652	-0.000493514	-0.0029951	-0.00288496	-0.00522016	-0.0114817
		36.439	0.00122931	-0.0078259	-0.00987614	-0.00875254	-0.00836813	-0.00180096	0.00672627	0.000174527	-0.00440766	-0.000622787	-0.00283557	0.0035382	-2.48013e-05	0.000738105	-0.00120772	-0.00172384	0.00322378	-0.00043295	-0.00316067	-0.000957374	0.00624812	0.0073112	-0.00422731	-0.000642957	0.00123049	0.000655052	9.97791e-05	0.00274919	0.00307903	0.00121626	0.00222951	-0.0032366	-0.0091429	-0.007203	-0.00685418	-0.00824117	-0.0165442	-0.0161158	-0.0183607	-0.0124081	-0.010804	-0.0105963	-0.0071591	-0.00448478	0.00668355	-0.00831473	-0.000794826
	3	41.371	0.0028091	0.00677313	-0.00424616	-0.00345997	0.000350242	-0.00541862	-0.00790369	-0.0106394	-0.00286291	-0.00489107	-0.00307257	0.00414108	0.00719244	0.0120179	0.0101492	0.00715256	-0.00223395	0.00124696	-0.000306062	-0.00519416	-0.00765758	-0.0121047	-0.0161018	-0.00541976	-0.00436011	0.00513123	0.00677997	0.00735651	0.0112123	0.00640054	0.00715939	0.00479169	0.00300964	-0.00543913	0.00142471	0.00388585	0.00587185	-0.0031979	-0.00247551	-0.0078376	-0.0130801	-0.0139061	0.00271909	-0.0032355	0.0034768	0.00666033	0.00260059
		36.028	0.00391357	0.000130867	0.000828119	-0.00140559	-0.00974618	-0.0040095	-0.00564617	-0.0102959	-0.012101	-0.000779319	-0.00195811	-0.00589946	0.0032024	-0.00273886	0.000736266	0.00278627	0.00346404	0.00180093	-0.00213625	-0.00741226	0.00657175	0.00854382	0.00527467	0.00590234	0.0127927	0.0107274	-0.00222671	0.0073873	-0.00218217	-0.00227681	-0.00324823	0.00518142	0.00385372	0.00484602	0.0085313	0.00366445	-0.000333968	0.0034376	0.00263179	0.00063467	0.000978425	-0.00345838	0.00136393	0.0032358	0.00187609	-0.00248139	-0.00843657
		36.906	-0.010471	-0.00959028	-0.00574858	0.000839358	-0.00143923	-0.00288796	-0.0069673	-0.000373007	-0.00288288	-0.0134434	-0.00523899	0.00672708	0.00937547	0.00844904	0.00459718	0.00657585	0.00512076	0.0022398	7.81351e-05	0.00228937	0.00849225	0.00658093	0.0027062	0.00252701	0.000824108	-0.0030735	-0.00438499	-0.0014011	0.00373683	0.00240882	-0.00566598	-0.00250036	-0.00117744	-0.00526821	-0.00121429	-0.00752265	-0.0068021	-0.00708041	-0.0100567	-0.0142428	-0.0159025	-0.00698001	-0.0120341	-0.00632427	-0.00344458	-0.00734728	-0.0108433
		37.098	0.00593922	0.00280267	0.0032161	0.00282206	0.00939828	0.00286086	0.00218069	0.00636114	-0.00349226	-0.00120077	-0.00479562	-0.0057595	-0.00334677	0.00208248	-0.00497143	0.00228738	0.00377382	-0.000806734	-0.00499689	-0.00428519	-0.00224831	-0.00517148	-0.00116319	-0.000783698	-0.000617595	0.00332158	0.0034016	0.00127743	-0.000949801	-0.00771394	-0.0143859	-0.012908	-0.0133093	-0.00805948	-0.0101558	-0.0126085	-0.0167089	-0.0120896	-0.00991813	-0.010197	-0.00450585	-0.00163482	0.00272022	-0.00475683	-0.00920038	0.00233952	-0.000516964
		35.681	-0.00401231	-0.00399758	-0.00134914	0.00801144	0.00711702	0.0054969	0.00502291	0.00401334	0.00208392	0.00469487	0.00186969	0.00431862	0.00583833	-0.0025167	-0.00210966	-0.00732352	-0.000966202	-0.0042252	-0.00720971	0.00109444	0.000370068	0.0108781	0.00250033	-0.00302283	0.000694093	-0.00697406	-0.00302952	-0.0020387	-0.00564315	-0.00596717	-0.00361866	-0.011647	-0.0178436	-0.0127168	-0.0216181	-0.0302892	-0.0347345	-0.0301566	-0.0232771	-0.0194932	-0.0300655	-0.0341654	-0.0331197	-0.0323565	-0.0291765	-0.0291952	-0.0297255
	4	43.794	-0.00389701	-0.00579258	-0.000190744	-0.00249891	0.00186279	0.000948014	0.00522955	0.00553841	-0.00628534	-0.00415635	-0.000497241	0.00488062	-0.0012517	-0.00387108	-0.00179868	0.000738181	0.00255595	-0.00389937	-0.00614152	-0.0100906	-0.00343726	0.00190287	0.00912915	0.0069035	0.00516825	0.00766739	0.00516354	0.00608539	0.00332691	-0.00275118	-0.0105409	-0.0304232	-0.0329695	-0.029789	-0.0250996	-0.0277425	-0.0297725	-0.0275209	-0.0194317	-0.0129576	-0.00422944	-0.00327694	-0.00758206	-0.00811018	-0.00881748	0.0116825	0.0273304
		38.211	0.00601331	0.00227808	0.00315371	-0.00609456	-0.00846429	-0.00233483	0.00317208	-0.00277775	0.00112893	-0.00688651	-0.00592719	-0.00309004	-0.00380239	-0.00386771	-0.0068314	-0.00771928	-0.000414148	0.0114692	0.0190172	0.00566836	0.00762783	0.0077707	-0.00103465	-0.00556795	-0.00849898	-0.00883781	-0.00241035	-0.00262875	0.00439675	0.00789521	0.00759721	-4.87891e-05	-0.00952158	-0.00610884	-0.014357	-0.0092195	-0.0106442	-0.00733147	-0.0111606	-0.011726	0.00188414	0.020346	0.0213216	0.0177579	0.0180028	0.00782785	0.0106711
		39.679	-0.000247285	-0.00171456	-0.00359079	-0.00400163	-0.00284484	-0.000150728	3.48116e-05	-0.00229201	-0.000870169	2.53453e-05	0.000661482	0.00181827	-0.00494826	-0.00128858	-0.000762253	0.00302617	-6.93179e-05	0.00469035	0.0072065	0.00240707	0.00152292	-0.00292436	0.00248659	0.000557353	-0.00478355	-0.000411999	-0.00218599	-0.00230526	0.00282927	0.00234838	-0.00708386	-0.0115482	-0.0117508	-0.00926869	-0.00474757	-0.0145376	-0.00883135	-0.00531177	-0.00539507	-0.00345258	-0.00176	0.00331395	0.00449156	0.00544576	0.00549877	0.00221775	0.00111019
		37.397	-0.00253496	-0.00468942	-0.00371426	-0.00953394	-0.00125237	0.0011807	-0.00310179	-0.000675927	-0.00247971	-0.00569819	0.0019637	-0.00238604	0.00538874	-0.000416527	-0.000577451	0.000945321	0.00582588	0.00706523	0.00584749	0.00870809	-8.26701e-05	0.000529801	-0.00110346	0.00107022	-0.00191048	-0.00271029	-0.00109385	0.00197812	-0.00101939	0.00642874	-0.00195131	-0.00280396	-0.0128677	-0.0125843	-0.00786706	-0.00579667	-0.00568858	-0.00516018	-0.000411723	0.00640712	0.011672	0.0146142	0.0128249	0.0163292	0.0116696	0.00864805	0.00560971
		38.017	0.00966276	0.00445396	0.00275604	0.00886853	0.001698	0.0047767	0.010283	0.00310966	0.00418173	0.0068591	0.00684507	0.00197865	0.0015661	0.0038197	0.00153523	-0.00341258	-0.00387284	-0.00131895	-0.00543043	-0.0143775	-0.00593279	-0.0084979	-0.00823409	-0.000462977	-0.0102576	0.00104971	0.00106094	-0.00518065	-0.0175544	-0.00582614	-0.00795906	-0.021882	-0.0280365	-0.0287887	-0.0238577	-0.02571	-0.0236669	-0.0216687	-0.0208408	-0.00653898	-0.00728831	-0.0153569	-0.012963	-0.0157218	-0.0138162	-0.017894	-0.0200269
	5	43.816	-0.00214238	-0.0034073	0.0185161	0.0188268	0.0114278	0.0169128	0.0138966	0.00074807	-0.0256377	-0.0298633	-0.00455201	-0.0089256	-0.01324	-0.0186917	-0.00630885	-0.000768353	0.0130829	-0.0013139	-0.0148637	-0.0186548	0.00815081	0.0164431	0.0489481	0.0403896	0.0161878	0.0205762	0.00945826	0.00504584	-0.0106843	-0.0316997	-0.0678571	-0.0928023	-0.0934385	-0.102899	-0.0642547	-0.041194	-0.0198143	-0.0277348	-0.0169996	-0.0015543	-0.0414251	-0.044323	-0.0195406	-0.0284283	-0.0106011	-0.0476591	-0.028922
		38.433	0.0375054	0.0286139	0.00710797	0.0122886	0.0301452	0.00983648	0.0175149	0.0145716	0.00402348	0.0069628	0.00686336	-0.00928497	-0.0170787	-0.0176097	-0.0131053	-0.0189899	-0.0123635	-0.00368874	0.00207852	-0.0010358	0.000221068	-0.00403676	0.00714178	-0.00411432	0.0116522	-0.00897473	-0.017029	-0.017564	-0.029532	-0.00680107	-0.0153187	-0.0497493	-0.0496001	-0.0523565	-0.0686619	-0.0752485	-0.082567	-0.0726333	-0.0609795	-0.0567356	-0.0426595	-0.00785111	0.0305588	0.0584028	0.0660752	0.0749787	0.071751
		39.453	0.0130593	0.0065339	0.0116152	-0.0005566	0.00421824	0.0027816	-1.99165e-05	0.00253045	0.00448583	0.00240189	-0.0012353	-0.00328188	-0.00361525	-0.00265849	-0.00816435	-0.00251049	0.00521836	-0.0017376	-0.0138421	-0.016548	-0.0129512	-0.00491884	-0.00276014	-0.00163445	-0.000507267	-0.00384696	-0.00329982	0.00519593	0.0126826	0.00572365	-0.00791769	-0.00785191	-0.015225	-0.00268839	-0.00742884	-0.00475738	-0.0019753	-0.00446288	-0.0103126	-0.00102751	-0.00561996	-0.00536134	-0.00263756	-0.00787433	-0.00166435	-0.00245667	0.0179194
		38.745	0.00319469	0.000577007	-0.00453335	0.00141367	-0.00526422	-0.0105611	-0.00807809	-0.00980527	-0.00511228	-0.00253883	-0.000407751	-0.000192336	-0.00469876	-0.00371592	0.00131558	0.00336203	0.00549887	0.00210223	0.00367746	0.000159639	-5.77007e-06	-0.000632784	0.0140713	0.00579892	0.000805886	0.00326201	0.00140982	0.00259076	0.000575083	-0.00123864	0.00697024	0.00749532	-0.0020426	-0.00392749	-0.00106362	0.000998222	-0.00487763	-0.000973218	-0.00193297	0.00207915	-0.00028658	0.00638939	0.00363899	0.0172525	0.027404	0.00949945	0.000217339
		35.214	0.00021286	0.0021476	-0.0086119	-0.015198	0.00349751	0.00392093	0.00982367	0.00868337	0.00363376	-0.0066017	-0.000560616	0.00788054	-0.000954691	-0.00307179	0.00592694	0.00552029	0.012033	0.0164663	0.0186296	0.0147999	0.000912971	0.00610511	-0.00865801	-0.0129299	-0.0179649	-0.0105886	-0.000556424	-0.00621181	-0.00766025	-0.00789711	-0.0127287	-0.0089368	-0.0151875	-0.0190863	-0.015374	-0.0127161	-0.0163425	-0.0100519	-0.014282	-0.0112782	-0.00776505	-0.0116408	-0.00579887	-0.0017093	-0.00766444	-0.000237811	0.00126093
	6	35.731	-0.011888	0.00735895	0.0396824	0.0257345	0.0140742	0.00877351	0.0220752	0.0201691	0.0259029	0.0217314	0.00614893	0.00479452	-0.00358284	-0.0175273	-0.0285293	-0.0173177	-0.014846	-0.00829231	-0.0223657	-0.00654774	-0.00299501	-0.0135019	0.000488967	0.00735208	-0.0091878	-0.00166639	-0.0105697	-0.0166628	-0.00428582	-0.0198838	-0.0617379	-0.0927964	-0.10505	-0.117941	-0.125273	-0.133831	-0.150011	-0.132487	-0.115924	-0.112043	-0.120567	-0.114756	-0.111401	-0.14465	-0.138403	-0.121156	-0.124482
		39.521	-0.018164	-0.014353	-0.00281114	0.0199963	0.0414228	0.0331786	0.0534026	0.0434845	0.0424857	0.0653797	0.0682951	0.0527554	0.0299144	0.00962346	-0.0104834	-0.0272591	-0.0290586	-0.0448215	-0.0347974	-0.0507668	-0.0455469	-0.0416606	-0.0596415	-0.0522315	-0.0433624	-0.0431811	-0.00179562	-0.00148036	0.0107422	0.0248814	0.0258523	-0.000311389	-0.0230686	-0.0258111	-0.0328584	-0.022706	-0.023861	-0.042492	-0.0471288	-0.0472292	-0.071599	-0.0864608	-0.0771063	-0.0669259	-0.0638403	-0.0565308	-0.0540282
		38.827	0.00476759	0.0038657	0.00188647	-0.00246126	-0.00678157	-0.0237119	-0.0135444	0.00238539	-0.00473929	0.000326659	0.0101515	0.00707303	0.00329824	-0.00382369	-0.00534786	0.00193307	0.00197419	-0.00404848	0.0115057	-0.000172261	-0.000251759	0.00127515	0.00812022	0.0142251	0.0105189	0.0058696	-0.00699539	0.00277465	0.00696886	-0.0162994	-0.0419965	-0.0224564	-0.0396746	-0.0341043	-0.0268973	-0.0280158	-0.0247454	-0.0370704	-0.0382272	-0.051084	-0.0509908	-0.0403462	-0.0411741	-0.0538171	-0.0439922	-0.0372485	-0.050278
		39.866	0.00349757	0.00161613	-0.00509206	-0.0126999	-0.00502393	-0.00452606	-0.00311978	0.0011532	0.00193058	-0.000738724	0.00272368	-0.00965677	-0.00915715	-0.0102001	-0.00335038	0.00361811	0.00117765	0.00848679	0.00437103	0.0046418	0.0114024	0.00657216	0.00287392	-0.00546066	-0.00231969	0.000171424	0.00229394	0.0102669	0.0106145	0.00367226	-0.00973888	-0.014922	-0.0109897	-0.00605462	-0.00537681	-0.0108307	-0.00922179	-0.0136328	-0.0107364	-0.00311279	-0.00878157	-0.00759191	-0.00649135	-0.00612799	-0.0111976	-0.0107626	-0.00450859
		35.817	0.00722609	0.00735369	0.00199649	0.00284996	-0.00250305	-0.00629765	-0.000559736	-0.00714903	-0.00304693	0.000210061	0.000929654	-0.00621189	-0.00160984	0.00320348	-0.00733939	-0.0132321	-0.00359709	0.00749385	-0.0101027	-0.00508438	-0.00804643	0.00137103	0.00314282	0.00583083	-0.0012856	0.00213874	0.00126226	0.00811303	0.00785992	0.00844982	-0.00399035	0.00395445	-0.00653821	-0.00396734	-0.00276453	-0.00544	-0.00386693	-0.00393387	-0.000174837	0.00133547	-0.000668511	-0.002798	0.0178819	0.035422	0.0176686	0.0044816	0.0036595
		34.424	-0.000343079	0.00606303	0.00709635	-0.00456774	0.00168138	-0.00166226	-0.000671117	0.00823277	0.00398468	-0.00237926	-0.00887909	-0.00640475	-0.00540658	0.00197427	-0.00517695	0.000741789	0.0075064	0.00325831	-0.00283617	0.00287638	-0.00287366	0.00378785	0.00702137	0.0022906	0.00178917	0.00513047	-0.000514128	-0.00607437	-0.00619621	-0.00554717	-0.00390229	0.00141895	0.00186649	-0.0120329	-0.008537	-0.00487234	-0.0124453	-0.00752242	-0.0207916	-0.0214804	-0.0205455	-0.0201847	-0.0196833	-0.0149314	-0.0174948	-0.0204213	-0.019463
CNO	1	40.179	0.00782914	-0.023394	-0.0419025	-0.0376351	-0.0356062	-0.0324068	-0.0278663	0.0184661	0.0258549	0.0222702	0.0589069	0.028586	0.034419	0.00923862	0.0175053	0.00389821	-0.00331988	-0.00701672	0.000435477	0.00233266	0.0060929	-0.0140056	-0.033275	-0.000686254	-0.0120109	0.0153252	-0.00869931	0.00751213	0.00672205	0.0102872	0.00214246	-0.0100308	-0.0368596	-0.0345576	-0.0346601	-0.0391762	-0.0428097	-0.0635812	-0.0484476	-0.040732	0.00378116	-0.015776	-0.055334	-0.0403565	-0.0366694	-0.013474	-0.00629003
		39.194	0.0372945	0.0598037	0.00385263	0.0426563	0.048671	0.0233763	0.00252087	0.00100633	-0.015349	0.00967579	-0.0436118	-0.0704558	-0.0521768	-0.056912	-0.0380324	-0.0575648	-0.0508712	-0.0174119	-0.00276263	0.00468824	0.0194942	-0.00204017	-0.0148442	0.00697746	-0.018265	0.00556737	0.0120172	0.0248386	0.0407414	0.0512387	0.0458769	0.0274238	0.0058372	-0.00295412	-0.0521333	-0.0315912	-0.0337238	-0.0444039	-0.0316608	-0.0443256	-0.0268909	-0.0379627	-0.0383544	-0.0486864	-0.0670699	-0.0664693	-0.0631094
		46.044	0.000260428	-0.00979636	0.0056542	0.00422746	-0.0088394	-0.0373568	-0.0363477	-0.0476746	-0.0277524	-0.0177826	-0.0397579	0.0113612	0.0260114	-0.0249337	0.0105608	0.00154797	-0.0183916	0.0230361	-0.0196443	0.0171899	0.0637156	0.0305352	0.0105956	0.014841	-0.00615991	0.0402266	0.0219921	0.00621098	0.0398264	0.00116519	0.0122659	0.0158676	-0.0295097	0.00645457	0.0183557	-0.034051	0.00231354	0.0237843	0.0220269	0.0314225	0.0321185	0.00490604	0.0215919	-0.0172606	0.00948205	-0.00776064	-0.00187968
		36.794	-0.0187217	-0.00288664	-0.00269812	-0.0271613	-0.0168801	-0.0149515	-0.0180112	0.0110923	-0.0066569	0.00611849	0.0154136	0.0224176	0.0189229	-0.0209404	0.0114404	-0.0223905	0.0244913	-0.0133709	0.00733658	0.0395433	0.028015	0.0164432	0.0116289	0.0186619	-0.00464126	-0.0299165	-0.0218685	0.0179368	-0.00688892	0.0197495	-0.0412273	-0.0756092	-0.0474193	-0.0385736	-0.0205779	-0.0129793	-0.00210358	0.0325829	0.0178353	-0.0141539	0.0124844	0.0169653	0.0244043	0.00574147	-0.0128343	-0.0356154	-0.0219265
		37.866	0.00932316	0.0123472	0.00721397	0.0130502	0.0096874	-0.0269989	-0.0228059	-0.0260587	0.00330054	-0.0126327	-0.0467694	-0.0477096	-0.0276342	-0.00198513	-0.00110419	0.00656173	-0.00367926	0.00896739	0.0226305	0.0298644	0.0163114	0.01931	0.0301524	0.0321684	0.0227068	-0.0143438	0.0113053	-0.0124464	0.00746809	-0.0164784	-0.00172254	-0.029142	-0.0368248	-0.0582471	-0.0609577	-0.0738838	-0.0384343	-0.0662857	-0.0706904	-0.0687845	-0.0748664	-0.0714951	-0.0809992	-0.072249	-0.0723507	-0.0650236	-0.0670904
	2	44.958	0.0001739	-0.00312692	-0.00023213	-0.00551663	-0.00210574	-0.00434868	0.0030479	0.00131983	-0.00372252	-0.00905594	-0.00381791	-0.00265852	0.0117372	0.00447512	0.000737694	0.00609802	0.00407276	0.0125774	0.00506827	0.00198269	-0.00659041	-0.00290067	0.00408377	0.000633741	0.00448124	0.000877114	1.73584e-05	-0.00428631	-0.0074416	-0.0130221	-0.005047	-0.00625164	-0.0012044	0.0010361	-0.00961851	-0.0130771	-0.00556799	-0.00437437	-0.00455047	-0.000295725	0.000996966	-0.00316973	-0.00033486	0.00839233	0.0094869	-0.00348404	0.00413269
		44.459	0.00288481	-0.00389403	-0.00306366	0.00302611	0.00616609	-0.00220829	0.00105669	0.006165	0.0061161	0.00635303	0.00205661	0.00647259	0.00162078	0.000531728	0.0059748	-0.00770353	-0.00597431	-0.00877084	-0.00405163	0.00177837	0.00386735	-0.00414292	0.000200231	0.00491618	0.000859964	-0.00179201	0.00660519	-0.00528523	-0.0088078	-0.00778613	-0.00317126	-0.00664709	-0.00428965	-0.00982185	-0.00575802	-0.00684816	-0.00507329	-0.00914799	-0.0106935	-0.0081198	-0.0128531	-0.0116152	-0.00756876	-0.00402989	-0.00578737	-0.00196809	0.00517703
		39.698	0.00703046	0.00445166	0.00421565	0.0123992	0.0114253	-0.00621133	-0.00174937	-0.0049356	0.00620937	-0.00134069	-0.00737279	-0.0056834	-0.00291455	-0.00536416	0.000626948	-0.00297666	-0.00865473	-0.00679144	-0.00603991	0.000390931	-0.00313566	-0.000792881	-0.00542751	0.00366784	-0.00249593	0.0061485	0.00625657	0.00421689	0.00128283	0.000803339	0.00276104	0.00242813	0.000778495	-0.00884727	-0.010764	-0.00813177	-0.007856	-0.0124186	-0.0139316	-0.0163104	-0.0204717	-0.0183935	-0.0145812	-0.00249345	-0.0121602	-0.0161539	-0.0136248
		38.177	-0.0134346	-0.00858038	-0.00343458	0.000570535	0.000110495	-0.00177733	0.00452023	-0.00354876	0.00570303	0.0101926	-0.00284817	0.00822604	0.00562765	-4.46988e-05	-0.0065174	0.00315673	0.0045424	0.00784249	0.00412891	0.00279425	0.0028275	0.00218345	0.00298713	0.00443819	-0.00630235	-0.000740855	-0.00597866	-0.00385693	-0.00674798	-0.00509516	-0.000943716	-0.0110413	-0.00928984	-0.0122219	-0.0125722	-0.0120523	-0.022897	-0.0199628	-0.0186026	-0.022692	-0.0154134	-0.0159809	-0.0154898	-0.0112408	-0.0136641	-0.0152936	-0.0153879
		39.903	-0.00177401	-0.000391875	-0.00721618	-0.0123672	-0.0129009	-0.0042673	9.21094e-05	-0.00126991	-0.00142848	0.00566089	0.000144176	-0.0117211	-0.009416	-0.00470987	-0.00841253	0.00586798	0.00361372	0.00901565	0.00610938	0.00356165	0.00356402	-0.00228995	0.00386695	0.000599761	0.00651526	0.00931622	0.0104546	0.00595436	0.00133225	0.00308004	0.0023866	-0.00457616	0.00287887	0.00321612	0.00465269	0.00911742	0.011006	0.00430361	0.00986766	0.00820388	0.00905589	0.00640403	-0.00248283	0.00417699	-0.00431937	-0.000376492	-0.0107603
	3	42.16	0.0034653	0.00269402	0.00395961	0.00431875	-0.00331059	-0.00118758	-0.00432837	-0.00728628	-0.0130205	-0.00810659	-0.0114488	-0.0151608	-0.00820864	-0.000644232	-0.00174417	-0.00497375	-0.0052282	0.00084665	-0.00184754	-0.000381837	0.00785181	0.01207	0.00368396	0.00425249	0.00515232	0.00928438	0.00677042	0.0139797	0.00247271	0.00730979	-0.00123396	0.00109844	0.0127538	0.00903524	0.00857141	0.00307436	0.0121416	0.0158535	0.0159145	0.00896368	0.00266221	-0.00331589	-0.0112527	-0.0174534	-0.0182525	-0.0203716	-0.0190185
		40.285	0.0135926	0.00838175	-0.00298456	-0.000145793	-0.00546147	-0.00109039	-0.00209113	-0.00167561	-0.00039785	-0.00469905	-0.0063549	-0.00462543	-0.00359349	-0.00525184	-0.00766136	-0.00236939	0.000258498	0.0016835	0.00119935	-0.00210361	0.00372866	0.00533459	0.00460837	0.0108424	-6.59327e-05	0.00499768	0.00506756	0.00125924	-0.00210111	-0.00553134	-0.00274997	-0.00404395	0.000771348	0.000687745	-0.000634935	-0.00326158	-0.00277867	-0.00195637	-0.00747419	-0.00491867	-0.00107167	-0.00197758	-0.0127112	-0.00565238	-0.00731322	-0.0107497	-0.00673423
		35.924	-0.000543604	-0.001378	-0.00315676	-0.00442118	-0.00375537	-0.00680588	-0.00506989	-0.00140977	-0.00638074	0.00325946	0.00124859	0.011645	0.00469614	0.00520558	0.00695134	0.00396314	0.00403766	0.00120216	0.00104945	-0.000311486	0.00368582	0.00671678	0.00165052	0.000489929	-0.00175184	0.00374568	-0.00178116	-0.0028831	-0.00420739	-0.00731043	-0.00838062	-0.000743958	-0.00195463	-0.00261067	-0.00567095	-0.00373949	-0.0185901	0.00425878	0.0196091	0.010449	0.00806062	0.00394848	0.0049478	0.000390974	-0.00161257	0.00531675	0.014676
		35.811	0.00797623	0.00371459	0.0132048	0.0142346	0.00912183	0.00867963	0.00747904	0.00557734	0.00372834	0.00437446	-0.00232387	-0.00138333	-0.00491637	-0.00478462	-0.00221275	-0.00139593	0.0018129	-0.00776777	-0.00699563	-0.00380399	0.00143714	-0.0072637	-0.0160069	-0.0154055	-0.0127339	-0.00727401	-0.00140281	0.00552464	-0.000824279	0.00428625	0.00837032	0.00387956	0.00190225	0.00256899	0.00391049	0.00225166	0.0104702	0.00270646	0.00534708	0.00519013	0.00686958	0.0104966	0.00717087	0.0166209	0.0113386	0.00936928	0.0138131
		35.521	0.00998017	0.00737769	0.00135243	0.0034829	0.00738407	0.00522426	0.0117713	0.00843909	0.00840975	0.00651912	0.00900551	0.00718633	-0.000804818	-0.00680711	-0.00372623	-0.010906	-0.00941342	-0.0130684	-0.0130212	-0.0048948	-0.00114161	-0.00598682	-0.00615394	-0.0108703	-0.00338051	-0.00133424	-0.00289446	-0.00140441	0.003451	0.00515027	0.00315248	-0.00104593	2.31277e-05	0.00238577	-0.00209968	-0.00620624	0.00270088	0.000298684	-0.00307944	0.0049015	0.00887411	0.00598715	-0.00179606	0.000350989	-0.00150774	-0.00761082	-0.00559644
	4	37.112	-0.00716753	-0.00187798	-0.00506341	-0.00298097	-0.00196683	-0.0032345	-0.000579976	0.000273806	0.000249969	-0.00274043	-0.00787829	-0.00362239	-0.0037199	-0.00265809	-0.00182814	-0.00191266	-0.000226762	0.00455788	0.0145107	0.0117132	0.0123048	0.00783649	0.00289366	0.00062702	-0.00286395	0.00130745	-0.00108921	-0.00273827	0.00101057	-0.000889851	-0.00258441	-0.00167862	-0.00691616	-0.00305031	-0.00345336	-0.00617073	-0.0037459	-0.0113953	-0.00446967	-0.00294846	0.000815545	0.0009759	0.00114926	0.00310602	0.00280481	0.00366293	0.00169966
		39.282	0.000227639	0.00869154	0.00591682	0.00146049	0.00751294	0.00397056	0.0011909	0.00512944	0.00416289	-0.00233011	0.00532505	0.00367632	0.00351687	0.00283963	0.000161887	-0.0035909	-0.00289722	0.000260515	-0.00188628	-0.00410047	-0.00670425	-0.00850749	-0.00619303	-0.00584947	-0.00389171	-0.00427636	-0.0028101	-0.00234983	0.00158213	-0.000950962	0.000712559	-0.00847461	-0.00772011	-0.00818366	-0.00595139	-0.00175971	-0.00557332	-0.0033509	0.00150158	-0.00101343	0.00283634	0.000101067	-0.000443029	-0.00619303	-0.00245997	-0.00557496	-0.0030994
		35.741	0.004264	-0.00038025	0.00544037	-0.00168344	-0.00422203	-0.00174248	0.00425088	-0.00160472	-0.00188898	0.00125748	-0.00311564	-0.00265646	-0.00396621	-0.00194364	-0.00283576	0.000483441	0.00480627	0.00347684	0.00113722	0.0023289	0.00547317	0.0036299	0.00113285	0.00719399	-0.00287511	-0.00147353	0.00532448	-0.00264553	-0.00111712	-0.00618119	-0.00986773	-0.0073357	-0.0136658	-0.0153757	-0.00934514	-0.0152182	-0.0132963	-0.0115886	-0.0144923	-0.00988304	-0.0116476	-0.0106221	-0.0111556	-0.0146563	-0.0143939	-0.0067169	-0.00785828
		49.841	0.00718845	0.000509007	0.00418663	0.005533	-0.00144244	-2.53489e-05	0.00481266	0.00167987	0.00119791	-0.00288048	-0.00498647	-0.00523008	0.000687125	0.00141793	0.00899583	0.0067091	0.00492268	0.00202825	-0.00113859	0.00174536	-9.08337e-05	0.00463978	0.000474955	-0.000164177	-0.000153699	-0.00352485	8.99042e-05	-0.00910415	-0.0096778	-0.00949182	-0.0089077	-0.0146232	-0.0129599	-0.0146651	-0.0117314	-0.0102567	-0.00443378	-0.00140053	0.00306029	-0.00152888	-0.00390728	0.00487553	0.00978427	0.0126263	0.0117462	0.0144573	0.00812357
		39.138	0.00974124	0.00120217	-0.00232826	0.0103153	0.0084058	0.00788233	0.000895824	0.00057758	-0.00136758	0.0100238	0.00339122	0.00410206	0.0021807	0.00417345	0.00215393	-0.00454705	-0.00304208	-0.00398194	-0.00356257	2.13954e-05	-0.0065398	-0.00175126	-0.00554342	-0.00732797	0.00157395	-0.00699486	-0.00208437	-0.00549286	-0.00477309	-0.00809533	-0.0126281	-0.0129552	-0.0184963	-0.0148142	-0.0127917	-0.018413	-0.0145346	-0.0153733	-0.0135382	-0.00496939	-0.00779493	-0.00916606	-0.0061115	-0.0103498	-0.00446377	-0.0154715	-0.0141212
	5	43.78	-0.0190082	-0.0113624	0.00853127	0.0308868	0.0372145	0.0198833	0.0132022	0.00468017	-0.0115809	0.000470709	0.0168815	0.0123112	0.0213045	0.0113024	0.0287269	0.0246573	0.0157647	-0.00456101	-0.010118	-0.00536117	-0.00192979	-0.00320367	-0.00873119	-0.00374857	-0.00587661	-0.0171501	-0.0194917	-0.0281045	-0.0292851	-0.0268846	-0.0394197	-0.0581549	-0.0673494	-0.0596546	-0.058474	-0.029587	-0.0441618	-0.0313027	-0.0257777	-0.0122436	-0.0118165	-0.00523845	-0.00386638	-0.00620797	-0.000979898	0.0166802	0.111694
		50.417	0.0241768	0.012458	0.00651556	0.00733708	0.00895436	-0.00157083	-0.0156454	-0.0197416	-0.0183218	-0.0196443	-0.0251316	-0.025956	-0.025893	-0.0196843	-0.0199649	-0.00277592	0.00829886	0.0209222	0.0228973	0.0211827	0.0365969	0.0216092	0.014725	0.00255967	0.0174529	0.0168633	0.00980736	0.00789525	-0.0159174	-0.0230449	-0.0269607	-0.031698	-0.0214018	-0.022979	-0.0146894	0.0023822	0.0360359	0.0527926	0.0488224	0.0635182	0.0665924	0.0626194	0.0650324	0.0553631	0.05676	0.0422417	0.0524835
		38.754	-0.00707662	0.00471395	0.00541006	0.00378437	-0.000163113	-0.00284377	0.00195115	0.00369358	-0.000645199	0.01118	0.0114891	-0.00229251	-0.00122024	0.00725193	0.00154473	0.00216949	0.0102482	-0.00017176	-0.00491696	-0.00524772	0.0015404	-0.00120511	-0.00471591	-0.00461214	-0.00354852	-0.00582276	-0.00224062	0.00514848	0.000148189	-0.0120704	-0.0114802	-0.0234848	-0.0134929	-0.00906549	-0.0180133	-0.00919952	-0.00942219	-0.0150494	-0.00366959	-0.00460998	-0.00202444	-0.000301469	0.00209599	0.0119733	0.0142714	0.00272508	0.00765187
		42.615	0.000750784	-0.00533453	-0.00667457	-0.000158849	-0.00123305	0.00113959	0.00489386	0.00204742	-0.0021047	-0.00389503	-0.00377568	-0.00508678	-0.0116712	-0.0145213	-0.00994418	-0.00220597	0.00542373	0.00559734	0.00905322	0.00803689	0.003977	0.00133309	-0.00364186	0.00259537	0.00672398	0.00693737	0.00409093	0.00479621	0.00723395	-0.00213906	-0.00224395	0.00055005	-0.00609045	-0.00513742	-0.0024266	-0.00321688	-0.00398003	-0.0019112	-0.00367622	-0.0109497	-0.00908338	-0.0129932	0.000295063	-0.00316624	-0.00290945	-0.00739793	-0.00518082
		35.82	-0.0039067	0.00529906	0.00326435	0.00740931	0.00820714	-0.00532297	-0.0046172	0.00570034	0.00293153	-0.00107888	0.0071591	0.00892236	-0.00139046	0.00752969	0.00118243	0.00338946	0.00645568	-0.00572897	-0.0149749	-0.00932866	-0.0120479	-0.00733644	-0.00395627	-0.00927437	0.00649817	0.00781766	5.8859e-05	-0.000160663	-0.00709095	-0.00577146	-0.00551181	-0.00670384	-0.00435755	-0.00613969	0.00223047	-0.00516482	-0.00362345	-0.00516246	-0.00405541	-0.00144239	-0.00147543	-0.00773063	-0.00429145	-0.00672272	-0.000134698	-0.00831839	0.00136183
	6	39.923	-0.00506702	-0.00321962	-0.00852553	-0.003566	0.00819776	0.0174589	0.0109581	0.014226	0.00526018	0.0182967	0.0181625	0.00410287	0.00442777	0.0101472	-0.00329212	-0.0106576	-0.00628341	-0.0119572	-0.00353647	0.00277102	-0.00949219	0.000177135	-0.0103944	-0.0149055	-0.00153332	-0.00832146	-0.00219925	-0.00170249	-0.00111444	-0.0122177	-0.0105394	-0.0172604	-0.0242285	-0.0210143	-0.0114309	-0.020249	0.00243537	0.0142126	0.0122255	0.013893	0.0105366	0.0164332	0.0193896	0.0244995	0.0369131	0.0284923	0.0431991
		39.432	0.00420483	0.00276005	0.0150452	0.0233298	0.0135501	0.00679895	0.0145783	0.00834419	0.0122088	0.00260936	0.00299937	-0.00273841	0.00542803	0.00323278	-0.0164535	-0.00830778	-0.0125565	-0.013109	-0.00975848	-0.00130544	-0.0154106	-0.0163324	0.000529345	-8.38717e-06	0.00141867	-0.00223613	-0.00253159	-0.00260841	-0.00466184	-0.002375	-0.00664436	-0.00400001	-0.0198483	-0.0280296	-0.0244368	-0.0136349	-0.0152451	-0.00444911	-0.00128772	0.00274232	0.00313823	-0.00322592	-0.00412706	0.0160202	0.00718895	0.00388869	0.00920692
		35.234	-0.00882615	-0.008448	-0.00334805	0.00734379	0.00499125	0.00310052	0.00186903	-0.003676	0.00174856	0.0120187	-0.000992162	0.00508495	0.00230742	-0.000550433	0.00386685	5.527e-05	0.00492432	0.0116841	0.00688868	-0.00174845	0.0054129	0.00193596	0.00181214	0.00275584	0.000209206	-0.00540945	-0.0153584	-0.00352206	-0.0173027	-0.00491083	-0.000212444	0.00336823	-0.00767163	-0.0089232	-0.0173528	-0.00462304	-0.0167639	-0.0100476	-0.0109143	-0.00940174	-0.00476024	-0.00467323	-0.012099	-0.00800627	-0.00794269	-0.0154052	-0.0128552
		35.839	0.00834745	-0.000927199	0.00178248	-0.000490449	-0.00417424	-0.00323443	-0.00285942	0.000856387	-0.00897392	1.71868e-05	0.00191053	0.0052216	-0.00136395	0.00198371	-0.00416052	-0.00180756	-0.00669413	-0.00042185	-0.00269249	0.00483516	0.00298297	0.00406913	0.000726048	0.00623001	0.00183279	4.00532e-05	0.00783753	0.00118109	-0.00170237	-0.00508661	-0.00526497	-0.00438919	0.00286864	5.83464e-05	-0.000161172	-0.000691675	0.00144863	0.013792	0.0101242	0.00121082	0.0024639	0.00153095	0.0128293	0.00630776	0.00898314	0.00986579	0.000517963
		36.134	-0.00412622	-0.00627034	-0.00411175	-0.00456869	-0.011458	-0.00685547	0.00264108	0.0029719	0.00468595	0.00410908	0.00147908	-0.00133081	-0.00540194	0.000918754	0.00710712	-0.00418412	-0.002774	0.00666259	0.00346605	0.00595546	0.00256251	-0.0032723	0.00093116	-0.00288566	0.00308768	-7.99033e-05	0.00630075	-0.00402284	0.00453915	-0.000230839	0.00415457	0.0031952	0.00818642	0.0114719	0.00990874	0.0091706	0.00781011	0.0132066	-0.00143833	0.00626767	0.00811819	0.0243593	0.0156422	0.0111783	0.00141705	0.00622839	0.00306701
[truncated: 314 more columns]

## Sheet: Figure 5k-p
Treatment	Mouse#	latency to drinking onset (s)	dF/F
			time (s), water bowl presented at 30s
			1	2	3	4	5	6	7	8	9	10	11	12	13	14	15	16	17	18	19	20	21	22	23	24	25	26	27	28	29	30	31	32	33	34	35	36	37	38	39	40	41	42	43	44	45	46	47
Saline	1	38.782	-0.0177493	-0.00748335	-0.0168427	0.00114918	0.000618321	0.0233471	0.00252123	0.00434248	-0.022527	-0.00810404	0.00783795	-0.0329236	-0.0259898	-0.0342548	0.0158253	0.00261107	-0.00200329	-0.000508725	-0.0120079	-0.0189335	0.0298317	0.0105821	0.0560723	0.0357201	0.0152454	0.016299	0.00320726	0.0317673	0.00720909	-0.0214163	-0.0434427	-0.0471832	-0.05495	-0.0691034	-0.0655998	-0.0190397	-0.0456968	-0.0592703	-0.0612222	-0.058274	-0.0566324	-0.0480407	-0.00593162	-0.0172184	0.00609838	0.0139714	0.00653123
		44.298	-0.0488952	-0.0525628	-0.0315516	-0.0328322	-0.0857704	-0.0616262	-0.0282819	-0.0538931	-0.0465081	-0.00848909	-0.0275483	0.00409275	-0.00314305	-0.0110253	0.017607	0.0245942	-0.00499552	0.0128205	0.0242212	0.028871	-0.00259602	0.0203919	0.0259991	0.0202179	0.0394388	0.0549547	0.029331	0.0290824	0.0539228	0.0672133	0.0469605	0.0237488	0.0440015	0.0124723	0.0180173	0.0365419	-0.0143449	-0.0321857	-0.0196909	-0.0148422	-0.0379793	0.00374463	-0.0402794	-0.0187833	-0.00679825	-0.03139	0.00711388
		40.57	0.0414107	0.0115252	0.0335683	-0.0102571	-0.0174777	-0.0351483	-0.000308625	-0.00179287	0.00699226	0.0137716	-0.0272657	0.0099808	0.026147	-0.00111092	0.0210525	0.027872	0.0219751	0.0135711	0.00623008	0.0370783	-0.00636595	0.00584899	-0.00815105	0.00476589	-0.03924	0.0515397	0.0071126	-0.0463403	-0.0422887	-0.0435122	-0.0611827	-0.071071	-0.0405437	-0.0826642	-0.0450365	-0.0417471	-0.0294119	-0.0211282	-0.037856	-0.0159133	-0.014088	-0.0478446	-0.0439735	-0.0242571	0.00306101	-0.0148903	0.0325052
		38.385	-0.0471142	-0.037994	0.00396393	0.0149179	0.0110333	0.00625605	0.0122397	0.0221803	-0.00250226	-0.0238552	0.00509793	-0.0480069	0.0161725	0.0577926	0.0536426	0.0715936	0.0363914	-0.0130943	0.0210945	0.0103095	-0.00329848	0.0171135	0.0138804	0.00635256	0.0103819	-0.00341911	-0.0190538	-0.0590091	-0.0481034	-0.0543766	-0.00573536	-0.0192709	0.058251	0.0734514	0.0488654	0.0380803	0.0231936	0.0389489	0.0584923	-0.0189573	-0.016641	-0.0127082	-0.0587919	-0.00518043	0.0823545	0.0176684	0.0195262
		36.869	-0.0301448	0.00389989	-0.0213073	0.0435734	-0.0413208	-0.0524968	0.0200793	0.026551	-0.0326193	0.0388419	-0.0442304	-0.021117	-0.00268063	-0.0183162	-0.0695735	-0.00958746	-0.0504302	0.00846819	0.0298413	0.0367753	0.0612211	0.0115681	0.0966798	0.0123023	-0.0201924	-0.0244072	-0.00550862	0.00542266	0.0813978	-0.00822785	-0.0126602	-0.059023	-0.0605457	-0.0746041	-0.106664	-0.0512732	-0.0640535	0.0134716	-0.00757523	0.0607861	0.0149399	0.0406366	0.0401472	0.0188284	0.0307658	0.0292974	0.0921659
		37.681	-0.0369003	0.00662779	-0.0194439	0.0518248	0.023182	0.0239338	0.0137246	0.0199493	-0.0269467	-0.0427491	-0.0129937	0.0137396	0.0304442	0.0167618	-0.00684411	0.0490132	0.0051543	0.0318124	0.0466526	0.0287903	0.012221	0.0583954	0.0230166	-0.00637801	-0.00779135	-0.0654228	-0.0560256	-0.078594	-0.060852	-0.0272174	-0.0528531	-0.0924719	-0.0828942	-0.109898	-0.0813155	-0.0829393	-0.0577096	-0.0841572	-0.0544619	-0.0594386	-0.0297584	0.00246293	-0.0200003	-0.0586718	-0.0497256	-0.027894	-0.0467185
	2	42.071	0.0155738	0.0344428	0.0215734	0.0111308	-0.0159379	0.00203638	0.00175447	0.00673678	0.0268376	0.0170139	0.00123357	-0.0183709	-0.0446306	-0.0256268	-0.0292915	-0.0317428	0.00675517	0.00611783	0.0369493	0.0293747	0.0171365	0.0218247	0.000136602	-0.0050602	-0.00337492	-0.0136398	0.00266146	-0.0156744	-0.0340961	-0.0265828	-0.0219559	-0.00801404	-0.0444958	-0.0253633	-0.018855	-0.0169001	-0.0416952	-0.0354198	-0.0303333	-0.0285377	-0.0149574	-0.0534248	-0.038821	-0.0230713	-0.0266992	-0.00756667	0.00909005
		43.961	-0.0244811	-0.00805459	-0.0314818	-0.0539801	-0.0639651	-0.0355583	-0.0197252	-0.0054057	-0.0238791	-0.0179793	-0.0054057	-0.0115205	0.0149082	-0.00187958	-0.0508066	-0.0365731	-0.0470569	-0.0139114	-0.0344231	0.0159574	-0.00575831	0.00598108	0.0397888	0.0255037	0.0656241	0.0446824	0.0835299	0.0878558	0.0727795	0.0697092	0.0314723	0.0197071	0.0367013	0.00108752	-0.0171623	-0.00611952	-0.0187275	0.0258908	0.009404	-0.0216344	-0.00794278	-0.00456287	0.00469104	0.00602409	0.0332784	0.0203264	-0.00303202
		45.921	0.022284	0.0335441	0.0201888	0.00775218	0.0338466	-0.00620818	0.012794	-0.0043595	-0.035451	-0.00332871	-0.0328292	-0.0441678	-0.0277874	-0.0115862	-0.0104097	0.012682	0.00985856	0.00907427	0.0162449	0.029365	0.00430131	-0.00347437	-0.0113173	-0.00885236	-0.012785	0.0174886	0.0122002	0.0296899	-0.0282803	-0.0172667	-0.0132108	-0.0206167	-0.0126282	-0.0129083	-0.0235074	-0.0789231	-0.0117654	-0.0394173	-0.0241908	-0.0535681	-0.0568621	-0.045882	-0.000101922	-0.00688043	-0.0102641	-0.0229696	-0.0638759
		40.879	-0.00998652	0.0160284	0.0150199	-0.0356008	-0.0553296	-0.0466534	-0.0763295	-0.0818281	-0.110482	-0.0512816	-0.0635914	-0.00383853	0.0105022	0.0165534	0.0627255	0.10782	0.0265974	0.0280757	0.0564117	0.0534966	0.0283797	0.0264869	0.0473762	0.0460223	0.0309356	0.00901006	-0.00252604	-0.00879837	-0.0392482	-0.0203068	0.0299823	-0.0218266	-0.0396212	-0.0226693	-0.0339567	-0.0393311	-0.0578717	-0.0622375	-0.0739532	-0.0779045	-0.0712729	-0.0620164	-0.0346475	0.0171337	0.0210021	-0.0194641	-0.0155957
		40.264	-0.0103947	-0.0182643	-0.0348828	0.00084759	0.00495535	0.00607958	0.0012944	0.0142951	0.0159094	-0.0282094	0.0165292	-0.0233666	0.00815509	0.00417704	-0.0332541	-0.0275464	-0.00513389	0.00558954	0.010245	-0.0253844	-0.0183796	0.0320954	0.0576068	0.0213576	0.0234907	0.0197865	0.00623813	0.00262041	-0.0214064	-0.000896409	-0.00415379	-0.0115622	-0.0516453	-0.0171977	-0.0101209	-0.0527263	-0.00151618	-0.00323135	-0.00942903	0.0542485	0.0453123	0.052418	0.0691662	0.101956	0.108024	0.0972431	0.0710111
		36.266	0.011811	0.029079	0.0168068	-0.001968	0.00115435	-0.0317389	-0.013317	-0.0594191	-0.0183399	-0.0808683	-0.0422191	-0.0118509	-0.0254399	-0.0155434	-0.0221411	-0.00822626	0.0195898	0.0355816	0.0314139	-0.00401788	0.0127749	0.0460211	-0.00696375	0.0217618	0.0456003	0.0692079	0.0429259	0.00810496	-0.0519798	-0.0284265	-0.0278835	-0.0423413	-0.0762662	-0.0873845	-0.0792528	-0.0941858	-0.113585	-0.079728	-0.0959234	-0.0344132	-0.0444183	-0.0538532	-0.011145	0.00317708	-0.0110771	-0.00989604	0.0106571
	3	39.974	0.014614	0.00788318	0.00712481	0.00654231	-0.00740349	0.00608842	0.00187669	-0.0153976	-0.0116644	-0.00896752	-0.0156435	-0.024536	-0.0103935	-0.00391798	-0.00103956	0.00187858	0.00930159	0.0212333	0.0174584	0.0235405	0.0461575	0.0314836	0.0157676	0.00165164	0.00286769	-0.00320689	-0.019946	-0.0265444	-0.0200141	-0.0167366	-0.0300583	-0.0597333	-0.0610042	-0.0458405	-0.022189	0.000656861	0.020959	0.0236464	0.0291745	0.029044	0.0194196	0.0519711	0.0538831	0.0400962	0.0411439	0.0336869	0.0255585
		38.851	-0.00321238	0.0314359	0.0396995	0.0247961	0.0164155	0.0112886	0.00027522	-0.00145142	-0.00766079	-0.017077	-0.0177976	-0.0268894	-0.0229214	-0.0242565	-0.0316388	-0.0172377	0.0251688	0.0434101	0.0190172	0.00430094	0.00756082	0.0174496	0.00588876	-0.00928917	-0.0172548	-0.00658612	-0.00366783	-0.0141228	-0.0189549	-0.00966039	0.00297203	-0.00785576	-0.0354275	-0.047762	-0.0469337	-0.0572265	-0.0514789	-0.029817	-0.0324827	-0.0447891	-0.0156732	0.0144736	0.0249302	0.0293193	0.0301132	0.0254901	0.00841556
		38.522	0.0194026	0.00825466	0.00871143	0.0140344	0.0310842	0.0223558	0.0238188	0.013096	0.00947573	0.0151673	0.0126211	0.00480625	-0.0137564	-0.0173472	-0.00685954	-0.0121328	-0.00547339	-0.010577	-0.00944189	-0.0125195	-0.0148825	-0.0181093	-0.00712411	-0.00347445	-0.0134692	-0.00632136	-0.00851478	-0.012178	-0.0181093	-0.002631	0.0100931	-0.00118154	-0.0100547	-0.0148644	-0.0186022	-0.0228443	-0.0185638	-0.0153822	0.00292715	-0.00871151	0.00928579	0.020341	0.013641	-0.00361691	0.00575145	0.0104933	-0.00020468
		35.787	-0.0108771	-0.00639405	-0.0058875	-0.00981272	-0.0106473	-0.00250008	-0.00554162	-0.0120442	-0.00437677	0.0053749	-0.00638959	-0.00310258	-0.00132407	-0.0106295	-0.00916112	0.0131696	-0.00355112	-0.013613	0.00763542	0.00603543	0.0203014	0.0203662	0.0182641	0.0163561	0.00796568	0.00325274	0.00943848	0.00466752	-0.00350202	-0.0153781	0.00190491	0.0104828	0.0135489	-0.0058161	-0.0039327	-0.00982388	-0.0145279	-0.0140057	-0.0135282	-0.00858316	-0.0106027	-0.00770841	-0.00654803	-0.0051935	-0.0143672	-0.0245384	-0.0195287
	4	49.936	0.0185252	0.0178255	0.0262588	0.0225637	0.0251779	0.0156303	0.00566793	0.00314592	0.00207483	6.95078e-05	-0.00769343	-0.00702592	-0.0151408	-0.0146813	-0.0147986	-0.00126691	0.00537746	0.000865492	-0.00222348	0.00887281	0.00562743	-0.00959541	-0.008731	-0.0119596	-0.00882038	-0.0126495	-0.011908	-0.00815147	-0.00562946	-0.00877709	-0.00863046	-0.011813	-0.0218103	-0.0209584	-0.00860811	-0.00606934	-0.016325	-0.0204739	-0.0164269	-0.0213131	-0.0197002	-0.024768	-0.0217488	-0.0376364	-0.0345125	-0.0268822	-0.0283332
		45.613	0.00781017	0.0144137	0.00605339	-0.00337701	-0.00491089	-0.00482004	-0.000927239	-0.00215476	0.000791509	0.00429873	0.00798764	0.00357087	0.0118456	0.014683	0.0134428	0.00274055	0.00275428	0.00557062	-0.00621764	-0.00159276	-0.00371611	-0.00564402	-0.00205758	-0.00110049	-1.02913e-05	-0.00596728	-0.0153322	-0.0120067	-0.0172675	-0.0155868	-0.0192007	-0.0204705	-0.0236534	-0.0217212	-0.0185151	-0.0183619	-0.0227945	-0.0321024	-0.0478109	-0.0152392	-0.00242626	-0.00771878	-0.0120193	-0.00163713	-0.000796246	-0.00655991	0.00670519
		45.95	-0.00011607	-0.000647391	0.00544214	-0.00753889	-0.0100046	-0.000190141	-0.00504895	-0.0022442	-0.00573696	0.00161037	0.00272429	0.00596634	0.00245649	0.00168871	-0.000419478	-0.00271285	-0.00602185	7.35201e-07	-0.00197071	-0.00215731	-0.00279831	-0.00235531	-0.00903599	-0.00743206	0.00354762	0.00364448	0.00820273	0.00630536	0.00770702	0.00854887	0.00858591	0.00779676	-0.000690124	-0.00294931	-0.0125943	-0.0333927	-0.032095	-0.0210911	-0.0125003	-0.0162865	-0.0135942	-0.000590413	-0.00178695	0.00672415	-0.00582243	0.000774213	0.0019038
		52.208	0.0191609	0.0165799	0.00869217	0.00267383	0.0103083	0.00717078	0.0138663	0.0128342	-0.00429387	-0.00728494	-0.00936629	0.00604568	0.0147949	0.00875419	0.00407805	0.00217244	-0.0117974	-0.012478	-0.0052036	-0.0094869	-0.011122	-0.000779005	-0.00379593	-0.000992654	-0.00118907	-0.00595136	-0.00412157	-0.0104345	-0.00920778	-0.00784663	-0.0117802	-0.00648721	-0.0164339	-0.0181276	-0.0126916	-0.0164856	-0.0308121	-0.0218509	-0.0212324	-0.0141286	-0.0165356	-0.0186634	-0.0243045	-0.0110583	-0.0109618	-0.0188581	-0.0190718
		38.965	0.00447708	0.000448059	0.00404657	0.00498013	0.0109652	0.00822885	0.00744036	0.0107909	0.00290127	0.00228943	0.000683203	-0.00450048	-0.00488888	-0.00102363	-0.00240876	-0.00916591	-0.0100293	-0.00733156	-0.00470287	0.00637929	-0.00414835	0.00355991	-0.00181797	-0.00518602	-0.0006212	0.000388396	-0.00479646	-0.000982689	-0.00395298	-0.00061418	-0.00140735	-0.00669866	-0.0105908	-0.0208728	-0.0153393	-0.0213735	0.000490175	0.00127165	-0.00310132	0.000596632	0.000334582	-0.00410741	0.00643427	0.0114776	0.00290595	0.00244151	0.00772581
	5	42.945	0.0165423	0.0135463	0.00750705	-0.00313127	-0.0101031	-0.0150681	-0.0116518	-0.0093405	-0.00478156	-0.0176155	-0.0238248	-0.0146998	-0.0127001	-0.0218747	-0.0354027	-0.0239617	-0.0127662	-0.00570232	-0.00272283	-0.0157551	0.00331405	0.00662643	0.0246757	0.0229404	0.0264676	0.0174584	0.0187923	0.0244372	0.0322944	0.0234079	0.0199161	0.0222676	0.01637	0.0260096	0.023932	0.0144623	0.0242531	0.0115513	0.0270555	0.0251715	0.0344027	0.0328469	0.0460397	0.0550938	0.0562649	0.0586706	0.0604366
		39.812	0.012092	-0.00267761	-0.0135536	-0.010178	-0.00912245	-0.0215971	-0.028975	-0.00964048	-0.00954022	-0.00605043	-0.0191936	-0.0112809	-0.0197924	0.00617082	0.0260735	0.0263381	0.0242771	0.0116158	-0.00352986	-0.0143641	-0.0259392	-0.0185251	0.0147157	0.0055553	0.00977759	-0.00867961	0.000402769	0.0206787	0.0217983	0.0221687	0.0309754	0.0448593	0.0389186	0.0268617	0.0359413	0.0369718	0.0300034	0.0210519	0.0047671	-0.00764075	0.00623487	0.0191747	0.0409016	0.0543734	0.0550391	0.0421633	0.0341616
		42.831	-0.0282367	-0.0164292	-0.0109555	-0.0124997	-0.00279711	-0.0113451	-0.0297192	-0.0275287	-0.0314535	-0.0198883	-0.0161394	-0.0091974	-0.00614217	-0.00418455	0.0129161	0.0152159	0.0274985	0.0312617	0.0142323	-0.00174227	0.0252511	0.0153394	-0.00178028	0.0103693	0.0102743	0.01313	0.0243673	0.0145031	0.0200862	0.00344163	-0.00784797	0.00311853	-0.011041	-0.00922115	-0.0199073	-0.0458838	-0.0256661	-0.0386093	-0.0208719	-0.0161726	-0.010276	-0.00247876	-0.000963024	0.0311144	0.021906	0.0242818	0.038465
		39.179	-0.00961892	0.0226708	0.0312163	0.0380924	0.0147602	0.0162221	-0.00484283	-0.0130786	-0.0174985	-0.00438753	0.00444917	-0.0131871	-0.0236622	-0.00259107	-0.0157578	-0.038291	-0.0457184	-0.0439993	-0.023433	-0.00241452	-0.0259667	0.00191245	-0.0136114	0.0105974	0.017489	0.0312721	0.0318575	0.0116969	0.0135615	0.0359119	-0.00819415	-0.024545	-0.0269206	-0.030145	-0.0510489	-0.0644139	-0.0691652	-0.0918129	-0.10265	-0.0648909	-0.0510179	-0.0485246	-0.0412954	-0.0341219	-0.038514	-0.0301759	-0.0316781
		40.417	0.0181926	0.000339159	0.0140529	-0.0127245	-3.79466e-05	0.0148352	-0.000265899	0.012536	-0.00499942	-0.00346285	-0.00647126	-0.019214	-0.0209701	-0.0187863	-0.0141175	-0.012474	-0.0190396	-0.0243275	-0.0138023	-0.0201456	-0.0155387	-0.00245255	0.0245415	0.0343659	0.0403686	0.0452288	0.0465627	0.0124572	0.00524716	-0.023472	-0.0364258	-0.0224954	-0.0315178	-0.0505223	-0.0557089	-0.0804937	-0.0725295	-0.0888604	-0.088655	-0.069946	-0.033364	-0.0218791	-0.0205395	-0.00878173	-0.00749282	-0.0133802	-0.00636432
	6	43.417	-0.00243706	-0.000906898	0.00164829	0.0064079	0.0118985	0.00678022	-0.00517727	-0.00208857	0.00172774	0.00214661	-0.00651218	-0.00607175	-0.00559953	0.00118175	0.00857713	0.00763384	0.00723995	0.00317277	0.00167212	0.00360412	0.00403774	-0.00399332	-0.00285365	-0.00784823	0.00220109	-0.00197619	-0.00033025	0.000851422	-0.00381738	-0.0112491	-0.00991985	-0.0113944	-0.0145421	-0.0230783	-0.00772337	-0.000875114	-0.0112321	-0.00693218	-0.0135216	-0.00422943	-0.00653034	-0.0144774	-0.0081672	-0.0031817	-0.004083	0.000764017	-0.00281278
		43.066	9.58544e-05	-0.00123832	0.00414955	-0.00903871	-0.00275592	-0.00828184	-0.00225971	0.00243404	0.00116358	-0.00823357	0.00112883	0.0019832	0.00202568	0.00592105	-0.00190734	-0.00288625	-0.00174419	-0.00691195	0.00138659	0.00102167	0.000371957	0.0013026	-0.0018861	0.00686617	0.00272076	0.00196969	0.00445944	0.00919567	0.00121861	-0.00345294	0.00118192	-0.00227516	0.00412445	0.00586216	-0.00101628	-0.0105814	-0.0106944	-0.00770261	-0.0103362	-0.00701235	-0.0136205	-0.00821909	-0.0176336	-0.0265442	-0.0169057	-0.00331875	-0.000520068
		45.6	-0.000913849	-0.00917071	-0.00408561	0.000280973	-0.0034564	-0.0134006	-0.00867817	-0.00182451	-0.00519789	-0.000628337	0.00932671	0.00539178	0.00719958	0.00613601	0.00672868	-0.000165563	0.00322946	0.00477746	-0.000723057	-0.00260663	-0.00238607	0.0134443	0.00153939	-0.0041262	9.42396e-05	-0.0011926	0.00372607	-0.0020789	0.0043431	0.00355286	-0.00778374	-0.000907084	-0.00441442	0.00317534	-0.000770417	-0.00417627	-0.00410049	-0.00888249	-0.00330755	-0.0105036	-0.0125914	-0.0150569	-0.017548	-0.015	-0.0161421	-0.0115455	-0.0109474
		44.915	0.0176468	0.0184087	0.00838735	0.016242	0.00797255	0.00225363	-0.00171637	-0.000469032	-0.00129569	-0.00288722	0.00191091	0.00243897	0.00471153	0.00684877	-0.000932371	-0.00865321	-0.00575256	0.00130931	-0.0056393	-0.00907536	-0.0114715	-0.00443315	-0.00880618	-0.00552898	-0.00689988	-0.00378154	-0.00310197	-0.0120319	-0.000744094	-0.00604527	0.011135	-0.0021194	-0.00133393	0.00347744	0.00268167	0.00368483	0.000494418	0.00653253	0.0031759	0.00700322	0.00653106	0.00902426	0.0111703	0.0171393	0.00789607	0.00783135	0.00904191
		37.162	-0.0136931	-0.0013716	-0.0156425	-0.0156744	-0.0103668	-0.0128094	-0.0103362	-0.00802005	-0.0142364	-0.0113352	-0.000447622	0.00585347	0.0113126	0.00749578	-0.00150081	-2.66234e-05	0.00630503	-0.00116179	0.00290231	0.00377904	-0.0063555	-0.00278743	-0.000667153	0.00526713	0.0101038	0.00976334	0.0123268	0.0218792	0.00615775	0.0106109	0.0126756	0.00917839	0.00422227	0.0142846	0.0108332	0.0134064	0.0246108	0.0304659	0.0291196	0.0262809	0.0261476	0.0297698	0.0177915	0.0167605	0.0230297	0.0251652	0.0316428
	7	42.321	-0.00255403	-0.0127462	-0.0104643	-0.00382373	-0.000709057	-0.000860243	-0.00296658	-0.00806204	-0.00829266	-0.00481412	0.000396644	0.00208915	0.00815449	0.0104312	0.00831977	-7.99735e-05	-0.00127664	0.00274514	0.00522816	-0.00131764	-0.00501271	-0.00377632	0.00380728	-0.00266165	-0.00451944	0.000272365	0.00968812	0.00872976	0.00624802	0.00731529	0.000511955	-0.00479874	-0.000962741	0.00141394	-0.00839131	-0.0111588	-0.0207475	-0.0195214	-0.0181171	-0.0132715	-0.00776992	-0.00109599	-0.00649765	-0.0040646	-0.00088843	-0.00384038	0.00621855
		45.925	0.00670399	0.002255	-0.00219135	0.00650405	0.00466354	-0.00155446	-0.00254886	-0.000734836	0.000603835	-0.00248133	0.00702972	0.00372475	0.000243678	0.00329707	0.000609131	-0.00258991	-0.00472834	0.000986502	0.00171873	-0.00178618	0.00103417	0.00125794	0.0051336	-0.001189	-0.00928459	-0.00756855	-0.00890457	-0.00188151	-0.0043854	-0.00476674	0.00150688	0.00690128	0.00184717	0.00540372	0.00355394	0.00688275	0.0075064	0.00779373	0.015606	0.00543947	-0.000247565	-0.000724243	-0.0051216	0.00319114	-0.000485904	-0.00525931	-0.00237938
		42.609	0.00427546	0.00569312	0.00576321	0.00469252	0.00367265	-0.00122518	0.0031119	-0.00542908	-0.00412182	-0.00576728	-0.00644194	-0.00225381	0.00585959	0.00328713	0.00345711	0.00463645	0.000960008	0.00689698	0.00355875	-0.00356107	-0.000599588	-0.00235369	-0.00228535	-0.013369	-0.00861311	-0.00843437	-0.00760375	0.000146915	0.00876324	0.00491682	-0.00519601	0.00440689	-0.00560782	-0.0126277	-0.00729709	-0.0110384	-0.0117551	0.00153128	-0.00310896	-0.000871203	-0.00610023	-0.000911507	-0.00541856	-0.0057077	-0.00232566	-0.00364693	0.0111131
		37.982	0.00224827	-0.00105444	0.00172149	-0.00324639	0.00462567	0.00338469	0.00279675	-0.00148455	-0.00295834	0.00135255	0.00215357	-0.00883772	-0.00861675	-0.00270383	-0.00245129	-0.00243748	0.00376349	0.00545431	0.00279477	-0.00336871	0.000719235	0.00109409	-0.000292887	-0.000413237	-0.000578964	-0.00164238	0.00210819	-0.00051583	-0.00118466	0.0033472	0.000346348	-0.0208451	-0.0173293	-0.00735406	0.00519782	0.00248897	-0.0109389	-0.00465507	-0.00191662	-0.00955982	-0.00474583	0.00394303	0.029248	0.00438102	-0.00309644	0.00507155	0.00244359
		43.528	0.00177565	0.00249568	-0.0170681	-0.0147783	-0.00440777	-0.00116079	0.00648999	0.000886695	0.00078432	0.00867398	0.00177223	0.000821857	-0.0013536	0.000383354	0.00411319	0.00487588	0.0146339	0.00335562	0.00224486	0.00347847	0.00648999	0.00343752	0.0111344	0.00235065	-0.000969695	-0.00467053	-0.0085454	-0.0104069	-0.00826728	-0.00571816	-0.00285168	-0.0218404	-0.0241916	-0.0280921	-0.0198236	-0.0198151	-0.0149745	-0.0183495	-0.0234545	-0.0268704	-0.0247069	-0.015082	-0.0248383	-0.019566	-0.0210419	-0.0127274	-0.00923814
CNO	1	41.224	0.00593208	-0.0317962	-0.0201763	0.0156153	0.00952872	0.0401657	-0.00823605	-0.0237001	-0.00982324	-0.0342425	-0.0502599	-0.0315632	-0.0464303	-0.0602053	-0.0378974	0.0188771	-0.0275735	-0.00383854	0.00213159	0.0341082	-0.00388223	0.0280507	0.0678613	-0.00169803	0.0168385	0.00862592	0.037996	0.050446	0.0329142	0.0045342	-0.00462485	-0.0426881	-0.0255057	0.0131254	-0.00191645	0.0356371	-0.00996885	-0.0266707	-0.0166525	-0.0424114	-0.0259717	0.00730084	-0.00998341	-0.0587929	0.0361613	0.0191537	0.0436313
		38.355	0.0300733	0.00866499	0.0202533	0.000723696	0.0228425	-0.0277734	0.0220689	0.0152643	-0.0147484	-0.0174955	0.00342342	-0.0273313	-0.00975945	-0.0477766	0.0306417	0.0176009	0.00329712	-0.0127434	0.00348657	0.0126435	0.00416545	-0.0116856	-0.00600194	0.0137171	0.0102754	0.0107174	-0.0260841	-0.0412405	-0.0135959	-0.0218214	-0.0368356	-0.00734391	-0.0133907	-0.0283891	-0.00316012	0.0182482	-0.000681425	0.0124857	0.0361201	0.0467453	0.0344782	0.0937142	0.0366885	0.0721164	0.0684694	0.041188	-0.00980681
		37.377	0.0980129	0.0813646	0.0707999	0.0934774	0.00879677	-0.02249	-0.0446786	-0.0761826	-0.0429947	-0.0158361	-0.0209962	-0.0190951	-0.00975258	-0.0715928	-0.063418	-0.0664055	-0.026428	-0.0374815	-0.0271069	-0.0294154	-0.0213222	0.00624386	-5.69455e-05	0.00439707	0.0121644	0.0191442	0.0147173	0.0669434	-0.00969826	0.0476608	-0.0720816	-0.0268897	0.0114855	0.0303064	0.040518	0.0537443	0.023734	0.0893764	0.0347604	-0.00193089	0.0488829	0.0686815	0.123814	0.105699	0.0537171	0.110506	0.0527937
		37.068	-0.00814449	-0.00783974	0.0238662	-0.0129442	-0.0176931	0.0173396	-0.021096	0.0046293	-0.0473293	-0.0459833	-0.0277877	-0.0488149	-0.0157884	0.00222945	0.0273326	0.0375415	-0.00208773	0.0310149	0.028196	0.0270406	0.0117907	0.00709263	0.0226599	0.0268501	0.0272818	-0.0105697	-0.0188486	-0.0386441	-0.00420823	-0.00780165	0.0151175	0.00188662	0.0302023	-0.0105824	-0.0271528	-0.0440152	-0.0642298	-0.0513163	-0.0276988	0.00612762	-0.0244355	-0.0346317	0.0238281	0.0386081	-0.0364474	-0.00848732	0.0258216
		38.917	0.013333	0.0290003	0.0173429	0.0131358	0.0171348	0.00352718	0.0070989	-0.0204011	-0.018418	-0.0252876	-0.0364081	-0.0168294	-0.0374051	0.0186796	0.0185591	-0.00553358	0.0240372	0.00359292	-0.0102338	0.00145647	0.0152393	0.00879711	-0.0180674	-0.0141999	-0.0107487	0.0244644	0.00259591	-0.0127866	0.0108021	0.013837	-0.0163145	-0.00643199	-0.0185824	0.00581703	0.0150421	0.0126208	0.025834	0.0457523	0.00811782	-0.00431744	0.0331746	0.0214734	0.0361547	0.0134864	-0.00229055	-0.0203792	0.0190083
	2	40.277	-0.0233185	-0.0557886	-0.03533	0.00496884	-0.0181265	-0.00993977	-0.0130729	-0.0352079	0.00666152	-0.00218437	-0.0018914	-0.0360787	-0.0562525	0.00181134	-0.0272409	-0.00618007	-0.00225761	0.00608373	0.0148889	0.00672662	-0.00148451	0.00225078	0.00492001	-0.00140313	0.0205529	0.0504271	0.0689326	0.0662064	0.0522418	0.021798	-0.00271333	0.0205773	-0.018273	-0.00826337	-0.00395843	-0.00456877	0.0253705	0.00867971	0.00817516	0.024988	0.0276817	0.0366334	0.0257123	0.0450723	0.0732864	0.0632361	0.07362
		40.896	-0.0245825	-0.0522134	-0.0512144	0.00142594	-0.0318062	-0.00530245	0.00161379	-0.019041	-0.0122187	-0.0126542	-0.0178456	-0.013397	0.00409851	0.0181957	-0.0116295	-0.00442298	-0.0181615	-0.0173248	-0.0022798	0.00328735	0.000802626	0.0289201	0.0200827	0.0343165	0.035973	0.0271612	0.0353155	0.0420268	0.0254706	0.00562692	0.00977666	0.0350765	0.0332748	0.00148571	0.0122272	0.00914481	-0.0268623	-0.000520853	0.0131238	0.0258121	-0.00968274	0.024907	0.0220722	0.0592833	0.0520597	0.0683171	0.0612216
		41.989	-0.0117829	-0.0289317	0.0192876	0.0284233	0.0402092	-0.00821282	0.0185705	0.0141898	0.00979342	0.0280023	0.0513559	0.0168088	-0.0535636	-0.0261879	-0.0346064	0.00338601	-0.0264685	-0.0276221	0.0100896	0.00115666	-0.00899231	-0.0245977	0.00916983	0.0404118	0.00840593	0.00312098	-0.0126559	-0.0224307	-0.0210277	0.0169336	-0.0475771	-0.0517864	-0.116313	-0.0425416	-0.0801287	-0.0134198	-0.00526634	0.000268044	0.0308397	0.00531915	0.012927	0.0052412	-0.0260476	0.0175104	0.0270669	0.0442002	0.0346592
		41.502	-0.0141361	-0.0387059	-0.0226955	-0.017182	-0.012642	0.000794751	0.0460692	-0.0131143	-0.00886353	0.0213451	0.0450474	0.00407201	-0.00138366	-0.0145023	-0.0149457	-0.0375685	-0.0125456	-0.043429	-0.0131432	0.0425316	0.00973975	0.00196107	-0.00817916	0.00928671	0.0259718	0.0417605	0.0497609	-0.00695501	-0.0176543	-9.20369e-05	-0.000602904	-0.0056923	-0.02391	-0.0135674	-0.000149871	-0.0303489	-0.04367	0.00120923	-0.00459345	0.0158894	-0.0292211	-0.0182134	-0.0448556	-0.0607406	-0.0645095	-0.0385131	-0.0330382
		38.127	-0.0431106	-0.0103746	-0.0263773	0.00349914	-0.00380759	0.0208819	0.00279553	0.015244	-0.0402781	-0.000533092	-0.0282265	-0.00636945	-0.0129726	-0.00135397	0.0151268	-0.00452022	0.00677364	0.0397622	-0.00258078	-0.017546	-0.0283708	0.00598884	-0.0114391	0.0268807	0.00231744	0.0145585	0.0141345	0.0138278	0.0100842	0.0277286	0.0182569	0.00744117	0.00864993	-0.0313927	-0.0197381	-0.00211171	-0.0189352	-0.0111594	-0.010086	0.0153613	0.0167234	-0.00310398	-0.00645966	-0.0330706	-0.0359662	-0.0344959	-0.0313567
	3	40.284	0.0291651	0.0167093	0.00305777	-0.000882075	-0.00880494	-0.0122924	-0.012452	-0.0252401	-0.0303099	-0.0328908	-0.0262705	-0.0205888	-0.0135819	-0.00505843	0.0054641	-0.00613583	0.00176264	0.000152159	-0.0102127	0.00120704	0.00650585	0.00343881	-0.0028886	0.00798305	0.0202981	0.0189148	0.00968738	0.0264547	0.0225918	0.0172912	0.00233888	-0.00749479	-0.00872986	0.0035289	0.00768086	0.0138543	0.0263196	0.0151251	0.00804312	0.00219435	-0.00585428	-0.00546574	0.00284192	0.0144456	0.0172724	0.0171879	0.0131692
		37.182	-0.0350645	-0.0193068	-0.0107799	-0.024389	-0.0315053	0.0038986	0.046989	0.0514399	0.0405849	0.0327248	0.0376177	0.031618	0.0267726	0.0308683	0.0285344	0.00469961	-0.00730557	-0.0188688	-0.0182671	-0.0274589	-0.0185709	-0.0339636	-0.0349185	-0.0213724	-0.0145126	-0.00604883	0.0113878	0.00538618	0.00247022	-0.00557927	-0.0270801	-0.0415692	-0.0361792	-0.0212146	-0.00920746	-0.0158266	-0.019293	-0.0197941	-0.0225996	-0.0177186	-0.00781261	-0.00768043	7.31251e-05	0.00187637	0.00840869	0.0075702	0.00273064
		34.911	0.031077	0.0192306	0.0142308	0.00834614	-0.00783519	-0.00185644	-0.0155796	-0.000997137	0.0162252	0.0130958	0.00742485	0.00404964	0.00631332	-0.00632394	-0.0205644	-0.0211052	-0.0235548	-0.0280779	-0.0210325	0.00374825	0.00355587	-0.000263954	0.00108485	0.00190353	0.0146584	0.0189677	0.00364351	0.0139487	0.00298727	-0.0124096	-0.0248908	-0.025966	-0.00455404	0.0196303	0.0304207	0.0310257	0.0268318	0.0643117	0.0895991	0.0955052	0.0929721	0.0664279	0.0520336	0.0384473	0.0471044	0.036842	0.0238434
		38.535	0.00831783	0.000479454	-0.00270442	0.00285179	0.00954801	0.00496435	0.0059369	0.00825342	0.00507814	-0.00110926	0.000674823	0.00992801	-0.00721723	-0.00534512	0.00679138	0.0175474	0.00594334	-0.00872436	-0.00532794	-0.0182609	-0.0157426	-0.00950583	0.000919571	0.00128669	-0.0100061	-0.00624253	-0.00263786	0.006289	0.00237947	0.00149924	-0.00586467	0.00477328	-0.000501685	-0.00380578	0.00234941	-0.00849464	0.00665612	-0.000746433	-0.00282464	-0.00185424	0.0279792	0.0254931	0.0338747	0.034946	0.0259676	0.0193895	0.0284645
		36.52	0.0168378	0.00505511	0.00597509	0.0190248	0.0102932	0.00534391	0.00244423	0.0116417	0.00300088	0.000508786	-0.0124874	-0.0125852	-0.000201576	0.0100975	0.0166561	0.0152051	-0.00320373	0.00356218	0.0177927	0.0175785	0.00764968	-0.0108314	-0.0100488	-0.0137427	-0.00680678	-0.0236435	-0.0216965	-0.0230985	-0.021573	-0.0211351	-0.0197796	-0.019202	-0.0236366	-0.0296409	-0.0226071	-0.021205	-0.0221856	-0.0171059	0.00446586	0.0122845	0.00760775	0.0143061	0.0140988	0.010214	0.00595645	0.00265385	-0.00354145
	4	42.139	0.00563708	0.00274357	0.00671007	-0.00500778	-0.00344974	-0.00785404	-0.0108735	-0.00105284	-0.000989845	-0.00108854	0.00589535	0.00113514	-0.00138461	0.00430476	0.00289581	0.00159079	0.00197505	0.00646544	-0.000413454	-0.00319567	-0.00123657	-0.00129221	-0.00330801	0.00101335	-0.000781967	-0.00148644	0.000612291	0.0068791	0.00227112	-0.00541304	-0.00130061	-0.0197871	-0.0201682	-0.00308648	-0.00426446	0.00176192	0.00484651	0.00309109	0.00288531	-0.00517262	0.00437931	0.000656386	0.0059195	0.0132519	0.0183093	0.026447	0.0230432
		40.648	0.00405166	0.00127443	-0.00327013	0.00359695	0.00676062	0.00876368	-0.0019923	0.00298379	-0.000803343	0.00298637	-0.00890189	-0.00831965	-0.00401339	-0.0110299	-0.0148145	-0.00999166	-0.0101527	-0.0100522	0.001201	0.0118591	0.0109883	0.00454244	0.0065571	0.00897236	0.00537458	0.00434278	0.00801785	0.00394346	-4.69548e-06	-0.00662832	-0.00624188	-0.00230145	-0.011026	-0.00834799	-0.0133692	-0.00732392	-0.00312586	-0.00209793	-0.000575342	-0.00437021	-0.00968765	-0.012063	-0.00617232	0.00044873	0.00133497	0.00797276	0.00849575
		41.302	0.00404189	0.00654926	0.0114085	0.011476	0.0116328	-0.00175553	-0.00789458	0.00412347	0.0108336	0.00762767	0.007722	0.00460659	0.00214638	0.00583796	0.00417956	-0.000311278	-0.00787291	-0.0073388	-0.00646435	-0.00342542	-0.00422084	-0.00676518	-0.00885827	-0.00286199	-0.0019034	-0.002695	0.00099021	-0.00617753	-0.00716544	-0.012815	-0.00465042	-0.0106492	-0.00883405	-0.0127615	-0.0117251	-0.0120808	-0.0174868	-0.0162516	-0.00683401	-0.00680215	-0.00189193	-0.00165993	-0.00241329	0.0070566	0.00865637	0.00831347	0.00488448
		43.45	0.00219615	-0.00393284	-0.00654513	-0.0101603	-0.0070736	-0.00495133	-0.000729622	-0.000518236	0.00308733	-0.000395728	0.00130497	-0.00151511	-0.000645548	-0.00570559	-0.000462987	0.00366984	0.00298644	0.0141683	0.00784952	-0.00273298	-0.00537891	-0.00731381	0.00216012	-0.00215167	0.00446254	0.00803448	0.00660042	-0.00118482	0.0110047	-0.00529003	-0.011604	-0.0118994	-0.0167781	-0.00820019	-0.00408177	0.0073799	0.0146331	0.0124892	0.00971836	0.0230933	0.0159242	0.0105159	0.00949376	0.00951778	0.0100378	0.022291	0.0201675
		42.072	0.00873909	0.005861	0.00377064	-0.0016333	0.000601797	0.00934621	0.00939232	0.00662823	0.00343633	0.000243156	0.00155604	0.00320066	-0.0032997	-0.00182543	-0.000325544	-0.00316136	0.00314814	-0.0033996	-0.000611176	-0.00362119	-0.00269257	-0.00662224	-0.00554504	-0.00609069	-0.00054329	-0.00298332	-0.00118372	-0.000360128	-0.00326511	-0.00640706	-0.00235314	-0.00407846	-0.00290775	3.0534e-05	-0.0150119	-0.00421807	-0.000262782	0.00362462	-0.00128491	0.000483958	-0.000311455	-0.00474963	-0.007401	-0.00541183	0.0115403	0.0140085	0.00961519
	5	40.055	0.0159138	-0.00239003	0.0179046	0.0103614	0.00700988	0.0094632	0.0260979	0.0206863	0.0215198	0.01891	0.00609603	0.0063284	0.00928221	-0.00528128	-0.00826638	-0.0207676	-0.00665094	-0.0058935	-0.000589148	-0.00927407	-0.0145739	-0.0126278	-0.0156509	-0.00738604	-0.0109253	-0.0047294	-0.00709111	-0.00929865	-0.0143751	-0.0191231	-0.0105745	-0.0223763	-0.0011321	-0.0019521	-0.00234982	0.0102966	-0.0111196	-0.0137629	-0.0268472	-0.0214535	-0.00695928	-0.000917597	0.00519559	0.0118003	0.0124572	0.00411639	0.0182889
		46.734	-0.0164744	-0.0158436	0.00974348	0.00227843	-0.0134207	-0.00470514	-0.0145753	-0.00896705	-0.0106723	0.00227843	-0.00561012	-0.0114391	-0.0199116	-0.0137907	0.00467242	-0.00393612	0.00551945	0.0103297	0.0080026	0.0172798	0.0102049	0.00738516	-0.0032206	-0.0078347	-0.00763409	0.0121642	0.014946	0.0173467	0.0138984	0.0149171	0.0139051	0.0197786	0.00266183	-0.00988764	-0.00616738	0.016415	0.0173378	-0.00690742	-0.0124533	0.000410502	0.00650023	0.0153228	0.016201	-0.000692871	-0.000146757	-0.00312698	0.00983487
		51.483	0.00851353	-0.0117017	-0.00603247	-0.0325661	-0.0228909	-0.00580592	0.00134966	-0.0024381	-0.00315919	0.00857155	0.0260599	0.0176252	0.0114946	0.0173268	0.0207388	0.00963245	0.0119836	0.0126549	0.0254935	0.0136274	-0.000424041	-0.00658226	-0.00978984	-0.0214266	-0.0276871	-0.0121575	-0.00903008	-0.00221708	0.00121152	-0.0102512	-0.00505169	-0.0254216	-0.037774	-0.0264908	-0.0197137	-0.0155917	-0.0214764	-0.0192192	-0.0205895	-0.0295658	-0.0369755	-0.0363263	-0.0453716	-0.0464132	-0.0582075	-0.0726623	-0.0614178
		46.217	0.0013221	0.00121504	-0.00175522	-0.0077177	-0.0144516	-0.018303	-0.0133206	-0.00592511	-0.00818986	-0.020156	-0.0278452	-0.024842	-0.0147755	-0.0050494	0.00660378	0.0202417	0.0249826	0.010749	0.0183393	0.0129149	0.018548	0.0320349	0.0388484	0.0054014	-0.0234831	-0.00560667	-0.0016262	0.0142051	-0.00151639	-0.0117201	-0.00423135	-0.0210701	-0.0349826	-0.0213062	-0.0273401	-0.0156237	-0.0161371	-0.0419855	-0.0461828	-0.0222478	-0.0209082	-0.0276365	-0.0299233	-0.0317653	-0.00232346	0.00133583	0.00845402
		37.339	0.0304631	0.0109498	0.00468762	0.00454339	0.0304862	0.00842011	0.000427272	0.00790379	0.0169725	0.0190926	0.0254326	0.0131275	0.00863067	0.0032627	-0.0338516	-0.00593584	-0.01105	-0.0304566	-0.0358708	-0.0154055	-0.0314345	0.00368094	0.00145991	0.0136814	0.00385978	-0.013072	-0.0178631	-0.0246618	-0.00899049	0.0104421	0.011068	-0.00508493	-0.00843379	-0.0294673	-0.00840206	-0.0152757	-0.0381927	-0.00575989	0.00578948	-0.0173554	-0.00309465	0.00747977	0.0113392	0.0203647	0.0266672	0.0161851	0.0116824
	6	51.298	0.00928685	0.00378514	0.00835795	-0.00205301	0.00388904	0.00781866	0.00315556	0.00297868	0.00263854	-0.00151743	0.00273996	0.00589776	0.00312711	0.00249258	0.00375051	-0.00241294	-0.00717005	-0.00188974	-0.0041211	-0.00243892	-0.00126139	-0.00771057	-0.0103266	-0.0112753	-0.00513041	-0.0111244	-0.00366839	0.00119013	-0.00096825	0.000572922	-0.00484592	0.000400994	0.00109366	-0.00133066	0.00198051	0.00428361	0.00016351	0.00330151	0.00045047	-0.00154712	-0.000959592	-0.00131705	-0.0047012	0.00557122	-0.00180192	-0.00534563	-0.000735714
		42.81	0.00080812	0.0060852	0.00777828	0.0118404	0.00629622	0.00231162	0.00337824	0.00070426	-0.00454974	0.000747122	-0.000988824	0.00173956	0.0101077	0.00532686	0.00661274	-0.00685774	-0.00746936	-0.00855247	0.00177748	-0.00779578	-0.0074875	-0.000279938	-0.00252365	-0.000909693	-0.00187246	0.00347221	0.00193574	-0.00833651	-0.00974439	-0.00475911	5.14248e-05	-0.0062692	-0.00088991	-0.00663189	0.000244308	-0.00557186	-0.0052306	0.000493242	-0.00778259	-0.00527017	-0.00976418	-0.0144066	-0.00626096	-0.00804471	-0.00656759	-0.0017043	-0.000283235
		34.577	-0.00604381	-0.00986122	0.00227417	-0.00385638	-0.00191761	0.00699743	0.00922585	0.00520076	-0.00362411	0.00152544	0.00951824	0.0150312	0.00208425	-0.000245271	0.00283571	-0.00151865	0.00124125	-0.0077421	-0.00473627	-0.00559703	-0.00384135	-0.000283527	0.000282117	0.00302699	-0.00129595	-0.00211162	-0.00855914	-0.00319372	-0.00198729	0.00334944	0.00382217	-0.00405175	-0.00660535	-0.00877365	-0.00731309	-0.00965628	-0.0103408	-0.0187817	-0.0147881	-0.0134272	-0.0113068	-0.0174824	-0.0250134	-0.0241786	-0.0240665	-0.0168594	-0.0110786
		36.123	0.011415	0.0164269	0.00873474	0.016201	0.0136519	0.0148011	0.0081751	0.0001741	-0.00780863	-0.013498	-0.0169372	-0.0168758	-0.0170501	-0.0147834	-0.0146339	-0.00705138	-0.00806437	-0.000485177	8.60858e-05	0.000448107	0.000951283	0.000733738	-0.0037799	-0.000888714	-0.00256265	-0.00207774	0.00354189	0.00648954	0.00657257	0.006546	0.0153657	0.0124828	0.0180095	0.00806882	0.0105847	0.0078629	0.00679842	0.00607438	0.00722023	0.0194625	0.0177139	0.00769849	0.00967799	-0.00306582	0.00276305	0.000615832	0.00174507
		40.491	-0.00427316	0.0032891	-0.000522759	0.000531739	0.0120179	0.00540292	-0.00778253	-0.000208217	-0.00580369	-0.00453829	-0.0047757	-0.00278842	-0.000669786	-0.00496491	0.00683945	-0.00173393	0.0061947	0.00163444	-0.000563734	7.01703e-05	-0.00505047	0.0031252	0.00868211	0.00523179	0.00294082	-0.00107953	0.00490038	-0.0111111	-0.00269081	0.0027962	-0.00549035	-0.00431052	-0.00299932	-0.00416952	-0.00491429	-0.0125272	-0.0114739	-0.00906118	-0.010323	-0.00943116	-0.010617	-0.0109123	-0.0104073	-0.00527825	-0.0124163	-0.00553253	-0.0070956
	7	40.924	-0.00564736	-0.00615353	-0.00945486	-0.021358	-0.0133315	0.000645896	0.000839651	-0.00634879	-0.000462559	0.000555778	0.00335095	0.00288383	-0.00248722	-0.0020141	-0.00612649	0.00317972	0.000558782	0.00657268	0.00230407	0.00560841	0.0156686	0.0081933	0.00771117	0.0133556	0.00333893	0.00546122	-0.000265801	0.0012617	0.00230858	-0.00220485	-0.00794388	-0.00457496	-0.00840198	-0.00472515	-0.00124809	0.00822334	0.00792145	0.010275	0.00682801	0.00553331	0.0099446	0.00920563	-0.0076585	-0.0113924	-0.0127817	-0.00671827	7.96529e-05
		35.386	0.00884353	0.00382786	-0.00299102	-0.00673951	0.000155136	-0.000534329	0.00650427	0.0142286	0.00944586	0.00515376	-0.00100786	0.000507445	-0.00104196	0.00252849	-0.00191136	-0.00204395	-0.0100789	-0.0111832	-0.00667322	-0.00540225	0.00183713	0.00556857	0.00123669	0.000537751	-0.00196819	0.00256826	-0.00658988	0.00348502	-0.000441517	-0.000625248	-0.007196	-0.00400628	-0.00627734	-0.00866206	-0.00690051	-0.00390589	-0.00904657	-0.0116396	-0.00178067	0.024849	0.00451164	-0.00077299	0.000808612	0.00918258	0.00324068	0.00502874	-0.00308194
		45.793	0.0133647	0.00146945	-0.00178191	0.000400714	0.0041902	0.00627498	0.00934194	0.00653276	-0.000852413	0.00246856	0.0118727	0.0200349	0.00259463	0.00301234	-0.00185341	-8.6613e-05	-0.00680947	-0.000223968	-0.00740781	-0.00636918	-0.00856121	-0.00216575	-0.00724787	-0.00355059	-0.00804566	-0.00111207	-0.00451207	-0.00829026	-0.0030388	-0.00525153	-0.00439729	0.000620858	-0.00656675	-0.00499751	-0.00921788	0.00119286	0.00224465	0.00695799	0.00279219	-0.00133221	-0.00161257	-0.000432822	-0.00452148	0.00847642	0.00154095	0.00197747	0.003526
		42.737	-0.0108437	-0.00396215	-0.00146554	0.000116736	0.00296753	0.00419947	0.00446126	0.00280583	0.00187225	0.00803774	-0.000248996	-0.00130385	-0.00805065	-0.000851493	0.00390111	-4.68809e-05	-0.0108129	-0.00516521	0.0003612	0.00198967	0.000341951	-0.00455309	-0.00958481	0.00580292	-0.00547128	0.00638809	-0.00415464	-0.00377543	0.00423604	0.0135141	0.0092947	-0.00567147	-0.00320373	0.000728858	-0.00293617	0.000915574	0.0144284	0.0137528	0.00672688	-0.00206226	-0.00242222	-0.00626049	0.000888625	0.00174136	-0.00894189	-0.00625664	-0.0157387
		42.438	0.00928993	-0.00237037	0.00532142	-0.00196326	-0.00997562	-0.0126459	-0.00608725	-0.00678286	-0.00723965	-0.00799136	-0.0106103	-0.00788878	-0.00063455	-0.008243	-0.00247776	-0.00161225	0.000211724	0.00225689	0.00670303	0.00870812	0.00321375	0.00791474	0.0105497	0.0074323	0.00449598	0.00985892	0.00360163	-0.000996781	0.00355354	0.00480853	-0.000400543	0.00370581	-0.00419756	0.00603466	0.00492714	0.00501048	0.00679118	0.00920499	0.0120371	0.00828498	0.00784902	0.00141221	0.00544644	0.00506978	0.00452804	0.00150037	0.00468031
[truncated: 314 more columns]

## Sheet: Figure 5g
pre-ingestive			post-ingestive
Saline	CNO		Saline	CNO
-0.164	-0.1237		-0.8401	-0.4903
-0.1651	-0.0923		-0.8782	-0.3756
-0.1226	0.0264		-0.7462	-0.5949
-0.0993	-0.0571		-0.9475	-0.4843
-0.1491	-0.0288		-0.9616	-0.4328
-0.1571	-0.0284		-0.9767	-0.2791

## Sheet: Figure 5h
# Licking			latency			# bout
Saline	CNO		Saline	CNO		Saline	CNO
757	268		8.7887	10.0154		18.8333	13.2
1024	538		11.5142	11.439		17.6667	18.8
496	289		7.4168	7.9402		9.8333	10
496	289		9.4196	10.2228		9.1667	12
532	497		9.1322	12.2772		12.1667	14.8
497	347		7.3643	7.3124

## Sheet: Figure 5i
Saline	CNO
-0.0019168	-0.1373
-0.0606	-0.085
-0.0308	-0.0714
-0.0441	-0.1323
-0.035	-0.061
-0.00015973	-0.0802

## Sheet: Figure 5p
pre-ingestive			Post-ingestive (1min)			Post-ingestive (5min)
Saline	CNO		Saline	CNO		Saline	CNO
-0.3727	0.0053996		-0.4006	-0.0532		-0.2865	0.064
-0.3942	-0.0324		-0.3694	-0.3519		-0.6129	-0.8241
-0.0913	-0.0506		-0.3174	-0.1938		-0.9404	-0.8121
-0.1449	-0.00066367		-0.1677	-0.0323		-0.9549	-0.6725
-0.1045	-0.0927		-0.2065	-0.1006		-0.972	-0.7516
-0.0782	-0.04		-0.0592	-0.376		-0.8417	-1.0504
-0.1734	0.0573		-0.1936	-0.1434		-0.9223	-0.7458

## Sheet: Figure 5q
# Licking			latency			# bout
Saline	CNO		Saline	CNO		Saline	CNO
431	846		9.4308	8.5882		15.8333	16.6
411	337		11.5603	10.5582		13.6667	11.4
903	1103		8.2835	7.4864		7	13
296	421		16.5344	11.9222		11.8333	13.2
978	664		11.0368	14.3656		9	13.4
			12.832	11.0598
			12.473	11.4556

## Sheet: Figure 5r
Saline	CNO
0.0126	-0.0151
0.0011124	-0.0070993
0.0027416	0.0018011
0.0018272	0.003083
-0.0022936	-0.00021974
