# Supplementary material for: Neural basis for regulation of vasopressin secretion by anticipated disturbances in osmolality
Source: eLife. 2021 Sep 29;10:e66609. doi: 10.7554/eLife.66609 (PMC8601670; doi:10.7554/eLife.66609)
Supplement: Figure 6—source data 1. [file elife-66609-fig6-data1.xlsx]

## Sheet: Figure 6a-c,g
Treatment	Mouse#	latency to feeding onset (s)	dF/F
			time (s), food presented at 30s
			1	2	3	4	5	6	7	8	9	10	11	12	13	14	15	16	17	18	19	20	21	22	23	24	25	26	27	28	29	30	31	32	33	34	35	36	37	38	39	40	41	42	43	44	45	46	47
Saline	1	41.036	0.0140505	0.010232	0.0108078	0.00408423	0.000783972	-0.00191957	-0.00118676	-0.00118415	-0.000851765	-0.00238543	-0.00255555	-0.00178086	-0.00266547	-0.00606519	-0.00339828	-0.00362336	-0.00195883	-0.000768015	-0.000472274	0.00191983	0.00293006	0.00133096	0.00129694	-0.000867468	-0.00552343	-0.00647347	-0.00526171	-0.00380394	-0.00447656	-0.00561765	-0.00815108	-0.00898857	-0.00926338	-0.00769307	-0.00322555	0.00469927	0.0142022	0.0323105	0.0562027	0.0660329	0.0713798	0.0712018	0.0726098	0.0668887	0.0586053	0.0621751	0.0640229
		42.229	0.00484605	0.00147322	-0.00101407	0.000792797	0.00033701	0.00158717	0.000229574	0.00174344	0.00423725	0.00543206	0.00104348	-0.00217633	0.000206785	0.00416237	0.00327358	0.00179878	0.00405493	-0.000278303	-0.00382042	-0.0020689	-0.0064412	-0.00720627	-0.00949823	-0.00576403	-0.00136568	-0.00209169	-0.000177379	-0.00125173	0.00110859	0.00486884	0.00195831	0.00622643	0.00554926	0.00977832	0.0238263	0.0251937	0.030445	0.0455316	0.0643979	0.0832577	0.094392	0.109293	0.110165	0.0921326	0.0912601	0.0814379	0.0784329
		40.559	0.0121392	0.00889527	0.00760269	0.00268164	0.00249648	0.00136414	-0.00148096	0.000303014	0.000157021	0.0028312	0.00237897	0.00380686	0.00414514	0.00556591	0.0085748	0.006157	0.00327274	0.00193743	0.000303014	-0.001659	0.000463251	-0.000640603	-0.00344297	-0.00648747	-0.00702159	-0.0088661	-0.00835334	-0.00864533	-0.00947856	-0.00820378	-0.0107961	-0.0109385	-0.00559014	-0.00403762	0.00254989	0.0170389	0.0208347	0.0300893	0.0433248	0.0596868	0.0684678	0.0727336	0.0799194	0.0848119	0.090552	0.0858909	0.074628
		37.714	-0.0024979	-0.0023142	-0.00550522	-0.00420568	-0.0044098	-0.000905795	-0.00216451	-0.00174608	-0.00186855	-0.000620032	-0.000521375	-0.000936413	-0.00352189	-0.0059917	-0.00679116	-0.00331097	-0.00245708	0.000665903	0.00377868	0.00274109	0.00248594	0.00210493	0.0067928	0.00718743	0.00544223	0.00466999	0.00598314	0.00275129	0.0031051	0.00110135	0.00095847	-0.00177669	-0.00818936	-0.00305582	0.00191782	0.00842234	0.024289	0.0502288	0.0696845	0.0853743	0.079853	0.0808633	0.0850069	0.0909875	0.0950358	0.0960768	0.0965905
	2	38.427	0.00360689	0.00471805	0.0036859	0.00444026	0.00330617	0.00384136	0.00308954	0.000706679	0.006344	0.00309464	0.000502798	-0.00403611	-0.00429351	0.000630224	0.00132087	-0.00527214	-0.00519059	-0.00676812	-4.00364e-05	0.0015324	0.000637869	9.24865e-05	-0.000819883	2.62251e-05	-0.00087595	-0.000488575	-0.00022353	-0.000758718	-0.00156405	-0.00494083	-0.00630429	-0.00977537	-0.00954091	-0.00170932	0.00297741	0.00282705	0.00510797	0.00208543	0.00698368	0.0195988	0.0220276	0.0326243	0.0413606	0.0527525	0.0649115	0.0672892	0.0732986
		45.654	-0.013215	-0.0088606	-0.00214873	-0.00076374	-0.00310484	-1.58617e-06	0.00318088	0.0029323	0.00271376	0.00638794	0.00266732	0.0015555	0.00103101	0.000730518	0.00140252	0.00130965	0.00214009	0.00399767	0.00375455	0.00299513	0.00182594	-0.000263833	0.00131238	2.84629e-05	0.00418889	0.0046369	0.00153911	-0.000668129	-0.00435597	-0.00479851	-0.00900538	-0.0035064	0.00545642	0.00670482	-0.00232629	-0.0059595	-0.00825962	-0.000255637	0.00561486	0.0101277	0.0124824	0.0109445	0.0202269	0.020664	0.0278621	0.018006	0.0291296
		38.987	-0.0289652	-0.00780629	-0.00615439	-0.0106341	-0.00873475	0.00759573	0.0282527	0.0217818	0.0123228	0.0164632	0.0122239	0.007624	0.0145639	0.00185767	-0.0102288	-0.0140887	-0.0169094	-0.0204088	0.0103905	-0.00202818	-0.000706187	-0.00250419	0.0174694	0.011392	0.00529108	-0.00398406	-0.00574201	-0.00569252	-0.00623922	-0.00584805	-0.010554	-0.0101204	-0.0140604	-0.00232745	0.00131568	0.0031561	-0.00954302	0.0179572	0.0881547	0.101269	0.0876551	0.140709	0.163294	0.153502	0.135046	0.122776	0.147284
	3	36.521	-0.0324343	-0.0209417	-0.0266625	-0.0389036	-0.0389066	-0.0499814	-0.0621624	-0.0460403	-0.0242214	-0.0091635	0.00344139	0.020291	0.0231769	0.00433423	0.00069976	-0.0021531	0.0122495	0.0187037	0.0334009	0.0472414	0.050458	0.0433394	0.0349161	0.0258915	0.0328989	0.028579	0.0135391	5.04262e-05	-0.00575149	0.00358268	0.00135511	0.0161395	0.0320361	0.0672715	0.0943542	0.11675	0.134195	0.159991	0.187218	0.204651	0.230134	0.222192	0.199991	0.19075	0.179083	0.181413	0.183743
		34.526	0.0104116	0.0109332	0.0119509	0.0198308	0.0206816	0.0165365	0.0129779	0.00753921	0.00664436	0.0163951	0.0231946	0.0186832	0.0146703	-0.00168061	-0.00774524	0.00120102	0.00131925	-0.00760846	-0.0222855	-0.0233635	-0.0222763	-0.0107845	0.00451153	0.00129607	-0.00306462	-0.012966	-0.0181428	-0.0249817	-0.0234679	-0.0188452	-0.014459	0.0125235	0.0565269	0.105702	0.161485	0.225959	0.255765	0.277147	0.292554	0.280221	0.26935	0.284727	0.313759	0.330845	0.322782	0.305761	0.30326
		35.705	0.0116621	0.0246407	0.0367843	0.0423872	0.0385544	0.0155248	-0.00734215	-0.00369635	0.011719	0.00733323	0.00687243	0.00826027	0.00216134	0.00363593	-0.00452038	-0.00542844	-0.00964348	-0.0297564	-0.00580522	0.0157335	0.00853676	0.00122346	-0.0229771	-0.0362755	-0.0366252	-0.0392003	-0.0184693	-0.00109414	-0.00288587	0.00573667	-0.0170462	-0.0262543	0.00159211	0.0765819	0.128585	0.190613	0.238353	0.266072	0.265077	0.254448	0.238561	0.233311	0.228678	0.221121	0.229044	0.229616	0.216228
		36.029	0.0385576	0.0385701	0.0218188	0.0103684	0.011519	0.00424892	0.0100714	0.0115814	-0.00386217	-0.00875877	-0.0132511	-0.00531218	0.0114641	0.012944	0.0227672	0.00725128	0.0149631	0.00119915	-0.000445526	-0.00358764	-0.0106655	-0.020601	-0.0163383	-0.028143	-0.0157143	-0.00408678	-0.0215768	-0.0358947	-0.0157143	-0.00466579	-0.00870636	-0.0217814	-0.0128118	0.0351659	0.0888963	0.171273	0.283687	0.354431	0.41463	0.498175	0.507676	0.525944	0.509987	0.502362	0.480056	0.427214	0.392109
		36.51	0.0484512	0.0403212	0.030771	0.0182149	0.0176359	0.0102798	0.00570215	0.00920843	0.00971706	0.0208419	0.0242779	0.0250327	0.0271538	0.00582119	0.00171971	0.00120568	-0.0151245	-0.0198158	-0.0229108	-0.0257137	-0.0294553	-0.040591	-0.0388568	-0.0337489	-0.0360648	-0.0310975	-0.0250914	-0.0222886	-0.00944302	0.00378669	-0.00227084	0.000575303	0.0404809	0.0741909	0.105877	0.141738	0.1807	0.249916	0.289124	0.296507	0.293006	0.332295	0.348741	0.352545	0.355275	0.350099	0.338877
	4	48.673	0.0188242	0.0170224	0.014015	0.017758	0.017677	0.00427081	-0.00434199	0.00663039	0.00264227	0.00196072	-0.00493807	-0.00802195	-0.011432	-0.0133124	-0.00974271	-0.0132315	-0.0164211	-0.0211762	-0.0185355	-0.0178989	-0.015699	-0.00904541	-0.0014853	-0.00417329	-0.00142682	0.0146944	0.0116802	0.00528527	0.00857834	0.00160307	-0.00253351	-0.0197906	-0.0101004	-0.00569386	-0.00548917	-0.00587156	-0.00963699	-0.0154898	-0.0258279	-0.00790498	0.0067766	0.000163478	0.00680809	0.0188377	0.0242519	0.0373094	0.105521
		46.043	0.000897886	0.0175423	0.0281464	0.0263087	0.0268244	0.00903844	-0.00144138	-0.00805837	0.000717402	0.0130583	0.00408567	-0.00201331	-0.014598	0.00701092	0.00178156	-0.00923738	-0.0168763	-0.0183108	-0.0223377	-0.0133815	-0.00579879	-0.00435023	-0.0155754	-0.00233443	-0.000857736	0.00167139	0.00571706	0.00371766	-0.000625685	-0.00208363	-0.0219041	-0.0290485	-0.0314229	-0.0533037	-0.0475845	-0.0403839	-0.0438131	-0.0259357	-0.0161731	-0.00774662	0.0149194	0.0237608	0.0387879	0.0376558	0.0262759	0.0108878	0.00933144
		36.966	0.0101882	0.0148339	0.0165583	0.0127689	0.00886803	0.00838614	0.00251787	0.00595878	0.00219329	0.00167556	0.000498717	0.00693849	0.00981388	0.0103953	0.00586718	0.000257773	0.00254973	0.00162976	0.000343398	0.00581342	-0.00228707	-0.00503502	-0.0121737	-0.0176696	-0.0203359	-0.021009	-0.0236554	-0.0123768	-0.00554678	-0.00603464	-0.00193262	-0.0027132	-0.0150252	-0.0174864	-0.00950344	-0.00248222	0.00346969	0.0145591	0.0266102	0.0404536	0.0621325	0.0778934	0.0940864	0.10549	0.111859	0.117635	0.134274
		35.8	0.0233908	0.0374697	0.0369423	0.0302351	0.0257345	0.0192757	0.0258859	0.0332529	0.0185425	0.0222745	0.0296746	0.0254696	0.0205906	0.0130013	0.00318887	-0.0113678	-0.0146812	-0.0137162	-0.0219512	-0.0200639	-0.0164502	-0.0188743	-0.0206812	-0.0255366	-0.0255105	-0.0241601	-0.0321326	-0.0328279	-0.0334002	-0.032589	-0.0209863	-0.0205204	-0.00367202	-0.00149148	-0.0105613	-0.000715759	0.0133939	0.0326475	0.0450567	0.0516243	0.0518679	0.0684655	0.0665948	0.0797041	0.0750214	0.0850845	0.0812461
		33.329	-0.000431425	-0.000364083	-0.00622287	-0.00394131	-0.00139307	0.00195788	0.000398232	0.0020791	-0.000234786	0.00578293	0.0100686	0.0082719	0.00486707	-0.00353725	-0.00335408	0.00315119	0.00336938	0.00204408	-0.00437769	-0.00328674	-0.00415142	-0.00274531	-0.0103981	-0.00724378	-0.000994407	0.000441331	0.00635129	0.00779781	0.00488862	-0.00313589	-0.00565719	-0.00342412	-0.00117758	0.00252894	0.014058	0.0188096	0.0183759	0.044793	0.0639829	0.0762203	0.0892955	0.0878409	0.0871432	0.0956553	0.0968136	0.0897103	0.0898962
	5	66.329	0.0938614	0.0546507	0.0404133	0.0518269	0.035959	0.0334664	0.0239269	0.0046167	-0.011851	-0.0156462	0.0087055	0.00201785	-0.023071	-0.0288747	-0.0107983	-0.0263258	-0.0437961	-0.051677	-0.0527765	-0.0114699	0.0158586	-0.000890229	-0.0236738	-0.0418595	0.00610354	0.00857431	0.00812451	-0.0198755	-0.0174891	0.00502901	-0.0130598	-0.0180451	-0.0461607	-0.0720836	-0.0940519	-0.0914968	-0.062316	-0.0664767	-0.0366618	0.00471353	-0.00600983	-0.031283	-0.049781	-0.0645963	-0.079599	-0.0977378	-0.108923
		33.882	0.00708127	0.0172161	0.0251494	0.0256869	0.0209946	0.0169473	0.0120877	0.00851374	0.00822435	0.0068849	-2.5338e-06	-0.00272278	-0.00264217	-0.00596599	-0.00853741	-0.00815707	-0.00989133	-0.0102861	-0.00736539	-0.00977765	-0.0134343	-0.00726824	0.00436929	-0.00322508	-0.00756383	-0.00872138	-0.00894049	-0.0101911	-0.0127893	-0.00755969	-0.00811367	-0.0065055	0.00830497	0.0344739	0.0511778	0.0900385	0.0960205	0.0907495	0.115168	0.130658	0.142852	0.166613	0.185522	0.180007	0.176673	0.169862	0.1634
		33.564	-0.0328503	-0.0225546	-0.0142291	-0.00720134	-0.0211599	-0.0229473	-0.0191152	-0.0239945	-0.0209297	-0.0236695	-0.0264273	-0.0136852	-0.0105324	-0.0232316	-0.00232658	-0.00869988	-0.01682	-0.00183233	0.0119299	0.0262337	0.0309843	0.0273644	0.0302396	0.0400703	0.0345817	0.0373193	0.0354529	0.0348006	0.0150872	0.0104426	0.00282352	0.00176055	0.0333901	0.0455906	0.0625575	0.0811086	0.0919392	0.107435	0.123989	0.156999	0.169606	0.172921	0.16548	0.150254	0.131795	0.112544	0.103614
		33.548	0.0241526	0.0138791	0.00828124	0.00783729	0.00204167	0.00196902	0.00973418	0.00902184	-2.07005e-05	-0.0175004	-0.00713002	-0.00524725	-0.0143846	-0.0101388	-0.00643786	-0.0111034	0.00884022	0.00412018	-0.00461966	-0.00290035	-0.00874238	-0.0170968	-0.0058809	-0.00933567	-0.0021537	-0.000420259	0.00010845	0.00117394	-0.00408894	0.00274191	0.00377914	-0.00553784	0.00936489	0.0179594	0.0391724	0.0608676	0.0673816	0.086284	0.108615	0.12353	0.138305	0.169338	0.161334	0.163558	0.142186	0.13325	0.127487
CNO	1	45.64	0.00378453	0.00185548	0.00368794	0.00356989	0.00142889	0.000669615	0.00156841	-0.00247213	-0.00187383	0.000642785	0.00391331	0.00482015	0.00289379	0.00135377	3.37534e-05	-0.00330653	-0.00489753	-0.00218774	-0.00320726	-0.00244262	-0.00248286	1.22897e-05	0.00644334	0.000487173	-0.00261701	-0.00203213	-0.00296311	-0.00127285	-0.00344068	-0.00647242	-0.00657438	-0.0105854	-0.0110308	-0.012772	-0.0124366	-0.0131584	-0.0120583	-0.0106793	-0.00946661	-0.00827269	-0.01003	-0.00524363	-0.000253323	0.0130998	0.0219106	0.0318268	0.0413513
		43.007	-0.00114022	-0.00105157	0.00322197	0.00586312	0.00350626	0.00296213	0.000247608	0.00614436	0.00581421	0.00501942	-0.00157736	-0.00528537	-0.00762084	-0.00934187	-0.00766364	-0.0104576	-0.00641031	-0.00281234	-0.00205423	0.000568582	0.00339621	0.00369579	0.00493994	0.00538014	0.00118608	-0.0025953	-0.00217651	0.00243023	0.00450281	0.00165378	0.0032128	0.00221625	0.0011769	0.00591203	0.0114206	0.0173907	0.0223153	0.0298628	0.0464434	0.055287	0.0577539	0.0564975	0.0530371	0.0541743	0.0638799	0.0623484	0.0589522
		39.616	-0.00984211	-0.0114695	-0.0134958	-0.0139227	-0.016733	-0.0178739	-0.0182693	-0.0160715	-0.0139052	-0.0108255	-0.00967762	0.00151434	0.0183058	0.016528	0.0131158	0.00831072	0.00825122	0.0145051	0.0118559	0.0144387	0.0145681	0.0147606	0.0128673	0.00736581	0.000404947	0.00544098	0.00807274	0.00213729	-0.000522468	-0.00788229	-0.0119524	-0.0124949	-0.00878521	-0.00815526	0.00025796	0.00859419	0.0127028	0.0169934	0.0180818	0.0388664	0.0639801	0.0913511	0.106799	0.121669	0.122747	0.11482	0.109364
		38.321	0.0101936	0.012243	0.0138876	0.0129378	0.00843419	0.00641344	-0.00138585	-0.00462733	-0.00269902	-0.00229742	-0.00527754	-0.00558033	-0.00504805	0.00168032	-0.000161935	0.000175918	-0.00216993	-0.000353172	0.00219029	0.00645488	0.00545726	0.00300623	0.00259507	-0.00251734	-0.00996604	-0.00886005	-0.00680744	-0.00218586	-0.00369983	-0.00856363	-0.0134689	-0.0129398	-0.00703055	0.00418234	0.0148693	0.0214128	0.0376967	0.067603	0.105066	0.139655	0.160978	0.159706	0.141478	0.140461	0.14652	0.139272	0.129873
		35.346	0.00313751	0.00308516	0.00117934	-0.00135128	-0.0023356	-0.00258692	-0.000164504	-0.00246126	-0.0028871	-0.00420651	-0.00424141	-0.00239843	-0.00223088	-0.00164797	-0.00341416	-0.00470565	-0.00460443	-0.00607393	-0.00418557	-0.00175617	-0.00292898	0.000292752	0.00105368	0.00418467	0.00557738	0.00458258	0.00540983	0.00744829	0.00702943	0.00346562	0.00185999	0.0063767	0.00835582	0.0147679	0.029079	0.0389466	0.0508457	0.055174	0.0719877	0.087531	0.0908749	0.0909342	0.0965818	0.0898696	0.0834471	0.0828921	0.0854681
	2	34.176	-0.0133952	-0.00895113	-0.00669377	0.00406949	0.00296151	0.0054843	0.00360195	-7.02259e-05	0.00455408	0.00042654	-0.00209869	-0.00154591	0.000713885	-0.00147286	-0.00438527	-0.00384711	-0.00308004	-0.00526192	-0.00117821	-0.000221204	0.000572648	0.00476107	0.00804849	0.00629033	0.00264494	0.000777198	0.00104506	0.00470749	0.00627572	0.00697947	0.00891052	0.0091516	0.0130819	0.0173409	0.0154975	0.0271009	0.0340849	0.0471542	0.06214	0.0712546	0.0743521	0.088544	0.105841	0.12867	0.145555	0.137475	0.110894
		33.782	-0.0139162	-0.00856418	-0.00895653	-0.00656991	-0.00233208	-0.00366521	-0.00530832	-0.00313196	-0.00459731	-0.00122873	0.00178436	0.00218755	0.00205965	0.00422084	-0.00233208	0.000761208	-0.00373241	0.00214202	0.00226992	0.00131397	0.00343613	0.00557781	0.00718623	0.00484079	0.000401372	-0.00105965	0.00672235	0.0050619	0.00898541	0.0190695	0.0250176	0.0259822	0.0284512	0.0242329	0.0300402	0.0401914	0.0507502	0.0731511	0.0962045	0.119529	0.130812	0.135127	0.133213	0.125744	0.134828	0.138065	0.134902
		37.226	0.000953041	0.00173543	0.00481634	0.00758915	0.00912758	0.00890665	0.006975	0.00553792	0.00174556	-0.00551078	-0.00678166	0.00115371	-0.00473853	-0.00426018	-0.00380818	-0.00366629	-0.00453787	-0.00313727	-0.00337239	-0.00546619	-0.00124616	-0.00522296	-0.00480339	-0.00613913	-0.00363386	-0.0010009	0.00124086	0.00646624	0.00610343	0.00291307	0.00206176	-0.00306835	-0.00340685	0.00185299	0.00273875	0.00896745	0.0126564	0.0237842	0.0357734	0.0429709	0.0455553	0.0602159	0.0686823	0.0825869	0.0905406	0.103726	0.104725
		35.017	0.00189452	6.2714e-05	0.000823086	-0.00222704	-0.00307166	-0.00102384	0.00535508	0.0010607	0.00176059	0.00527731	0.00742234	0.00413459	-0.00107352	0.000823086	-0.000911513	-0.00200023	-0.00203695	-0.00254674	0.000769082	-0.00188358	-0.00126794	-0.00543486	-0.00302414	-0.00346913	-0.00325743	-0.0039422	-0.00398108	0.0031366	0.00144521	0.00243024	0.00475671	0.00894308	0.0172035	0.0152075	0.00738129	0.00943775	0.0121142	0.0114683	0.0146826	0.0181561	0.0250643	0.0394703	0.0503531	0.0615232	0.066632	0.0785711	0.0789643
	3	36.6	-0.0362653	-0.0328114	-0.0356765	-0.0359567	-0.0288317	-0.0218893	-0.00743153	0.00680904	0.0134492	0.0114436	0.000379849	0.0040006	0.0029679	-0.00124791	-0.00344555	-0.000731564	0.00560003	0.0179011	0.0146362	0.0080275	0.0104581	0.016053	0.0102692	0.011368	0.00516239	0.0100362	0.0140128	0.0129076	0.0168495	0.0123094	-0.000353747	0.0188583	0.0523392	0.0843624	0.108908	0.125482	0.131297	0.160156	0.179724	0.196684	0.192132	0.180621	0.196829	0.169774	0.182601	0.192503	0.188631
		35.337	-0.00825038	-0.0101337	-0.0133148	-0.0113893	-0.0168114	-0.0128764	-0.0109088	-0.0121925	-0.00423465	0.00593269	0.00642019	0.00821587	0.00898044	0.00929258	0.00639213	0.00547325	0.00790724	0.00704096	0.00380734	0.00140491	-0.000320625	0.000265076	0.00236939	-0.000716937	0.00159079	0.00804402	0.00430536	0.000258061	0.00341102	0.00617118	0.00386696	0.000545651	0.0247347	0.0433719	0.0819299	0.104113	0.150604	0.169041	0.181685	0.193209	0.197713	0.229477	0.234465	0.239091	0.234956	0.226966	0.193111
		33.015	0.0111633	0.0116542	0.0207099	0.0180085	0.0260975	0.040345	0.0442841	0.0535295	0.0403782	0.0236521	0.0118289	0.00406818	0.00688396	0.00150839	-0.00848988	-0.0117634	-0.023686	-0.0147418	-0.0228398	-0.0118056	-0.009303	-0.0200361	-0.0250623	-0.0155489	-0.00957102	-0.0202379	-0.0256706	-0.0229241	-0.0239029	-0.0269084	-0.0216201	-0.0363074	0.00827529	0.080826	0.135663	0.199318	0.244271	0.258846	0.283628	0.292389	0.288293	0.253531	0.238217	0.226412	0.226358	0.231315	0.211779
		33.588	0.0460412	0.0416154	0.0371179	0.0505745	0.0631502	0.0474776	0.0494845	0.0305358	0.00671042	-0.017566	-0.0194922	-0.0164431	-0.00624454	-0.00593993	-0.0138957	-0.0324083	-0.0315482	-0.0289202	-0.0278809	-0.0184649	-0.0262116	-0.0246915	-0.023264	-0.023915	-0.0295772	-0.0205643	-0.0146482	-0.00892035	0.0156995	0.00689856	-0.00470954	0.00708372	0.0483736	0.0907355	0.168743	0.222737	0.261688	0.276782	0.300721	0.303629	0.28942	0.309023	0.309533	0.295264	0.277504	0.272592	0.267228
		33.846	-0.0258517	-0.01986	-0.0295078	-0.0332404	-0.0295796	-0.0319707	-0.0293919	-0.0284791	-0.0196237	-0.0147002	-0.00204511	0.00823515	0.0142499	0.0190135	0.0259551	0.0373915	0.022387	0.0142059	0.00102483	0.00581858	0.00448402	0.00864293	0.0158417	0.0213189	0.0264069	0.022811	0.0188328	0.00730837	0.00636074	-0.00231619	-0.0137225	-0.0252562	-0.00176244	0.0473219	0.116119	0.159559	0.170064	0.191266	0.196489	0.179397	0.16281	0.183525	0.188213	0.192205	0.191744	0.187548	0.173252
	4	39.408	-0.0130928	-0.0135851	-0.0157642	-0.014809	-0.0133773	-0.00253579	0.00104343	0.00571334	0.00729407	0.0131382	0.0125421	0.0106452	0.00911642	0.00483491	0.00611304	0.00414617	0.00193315	-0.00180414	-0.00376876	-0.00311163	0.00187895	4.98257e-05	0.00327225	0.0017254	-0.00221965	6.33748e-05	0.00322031	0.000878578	0.000731796	-0.00141799	-0.0028542	-0.0026487	-0.00537884	-0.010663	-0.0116363	-0.00810447	0.00757183	0.0121401	0.018034	0.0444682	0.0587987	0.0865675	0.0937711	0.0880715	0.114621	0.125338	0.124604
		45.32	-0.00957473	-0.0102825	-0.00929638	-0.00611527	-0.00620275	-0.00611527	-0.00970463	-0.0106828	-0.0109134	-0.00970993	-0.00809816	0.00297477	0.0010767	0.00327963	-0.000569522	-0.00316743	-0.00316478	-0.000972464	0.0059226	0.00902949	0.0189016	0.0181885	0.0126825	0.0104981	0.0115108	0.0118395	0.00744954	0.00223251	-0.00300042	-0.00475004	-0.00326552	-0.00599332	0.00060484	0.022035	0.0237475	0.0236732	0.0267138	0.0335453	0.0501056	0.0725352	0.0916086	0.0901559	0.0875951	0.0897689	0.0802043	0.0829586	0.0921494
		34.056	0.00925095	0.00922372	0.00570732	0.00618382	0.0100853	-0.00106487	-0.00714272	-0.00520948	0.00103952	0.00380519	0.00284246	-0.00223182	0.00149463	0.00177276	0.00302723	0.00418056	0.00355819	-3.21224e-05	-0.00470964	-0.0118572	-0.00585519	-0.0045132	-0.000158542	0.000833364	0.000955893	-0.000670054	-0.00756671	-0.00533979	-0.00506945	-0.0145645	-0.0144517	-0.0136562	-0.0083933	0.000323797	0.0114798	0.0120886	0.0250748	0.0272881	0.0354392	0.043991	0.0478166	0.0462685	0.0538925	0.050273	0.0522685	0.0467391	0.0486043
		35.652	-0.00263694	-0.00404474	-0.00621406	-0.0104625	-0.00665995	-0.00611636	-0.00789991	-0.0108358	-0.0139419	-0.00543501	0.00205991	-0.00169256	-0.000520229	-0.000525239	-0.00360387	-0.00807025	-0.00454323	0.00788149	0.00921915	0.00402381	1.3333e-05	0.00043918	0.00778881	0.00636597	0.0100608	0.010662	0.0107422	0.00937697	0.00554183	0.0030644	0.00596267	0.0254565	0.0309449	0.0386026	0.040296	0.0384849	0.0486501	0.0543389	0.0503184	0.0531516	0.0541987	0.0634395	0.0608494	0.0683719	0.0728658	0.069459	0.0735973
		36.596	-0.00435762	-0.00968562	0.00580579	0.014302	0.00331757	0.000860917	0.00582895	0.0073362	-0.00303141	-0.00652166	0.00394488	0.000871442	0.00684781	-2.173e-06	0.000338853	-0.0022441	-0.000682119	0.00253026	0.00232817	-0.000309517	-0.00581435	-0.00991718	-0.000147425	-0.00149469	0.00336177	0.00330072	0.00198293	-0.00740791	-0.00187992	-0.0036082	0.00125878	-0.00365662	0.00233028	0.0208278	0.0215056	0.0207141	0.0123421	0.0208614	0.0373044	0.0422408	0.0494508	0.0605552	0.0728658	0.0730994	0.0722511	0.0760255	0.0696492
	5	39.261	0.00261718	-0.00197483	-0.000181241	0.0028765	-0.0026901	-0.00254532	-0.00303801	-0.0045658	-0.00628807	-0.00557064	-0.00920967	-0.0143246	-0.0141345	-0.0157984	-0.0143873	-0.0135445	-0.0152193	-0.0109341	0.00269066	-0.00471707	-0.00881854	0.000492975	-0.000684741	0.0104268	0.00946738	0.00600555	0.0231224	0.0257177	0.0257998	0.0156153	0.0237945	0.0374322	0.0627952	0.0800763	0.075655	0.0930809	0.119619	0.130269	0.128423	0.146076	0.153097	0.144036	0.133905	0.136445	0.145054	0.138625	0.125214
		35.012	-0.0218291	-0.00948796	-0.00513973	0.00228507	0.0117014	0.0178771	0.00992318	0.00148311	0.000603207	0.00387258	0.00308293	-0.00298408	-0.0019524	-0.00230313	0.000551931	0.0172126	0.0145503	0.0100421	0.0054806	0.00443252	0.00281014	-0.000362837	-0.00128786	-0.00597656	-0.00408754	-0.00256772	-0.00614269	-0.00422907	-0.00611398	-0.00983253	-0.0068298	0.000841129	0.0229022	0.0338343	0.0376062	0.0553847	0.0623357	0.0746502	0.08501	0.0873462	0.0930502	0.0966395	0.113518	0.13843	0.139299	0.161543	0.169035
		33.311	0.0178478	0.0174909	0.0164425	0.00615924	0.00464443	0.00327158	0.0022029	-5.40978e-05	-0.00083482	-0.00264772	-0.00154254	0.00133295	0.00498105	0.00511489	0.00233674	-0.00247738	0.00365078	-0.00494122	-0.00714752	-0.00576655	-0.00273086	9.59631e-05	-0.00838856	-0.00705627	-0.00647022	-0.00446873	-0.0114709	-0.00624107	-0.0117872	-0.010972	-0.00909831	0.00333038	0.00864335	0.0231891	0.0373679	0.0374571	0.0408051	0.056239	0.0722854	0.0816581	0.074948	0.0697465	0.063588	0.0591672	0.0532905	0.0507496	0.0483081
		34.475	0.045783	0.0344006	0.0195988	0.00731054	-0.00657362	-0.0223024	-0.0218377	-0.0175547	-0.0119503	-0.0118963	-0.00999537	-0.00417041	-0.0171088	-0.0148487	-0.0120137	-0.0144005	-0.00806389	-0.0119527	-0.00662759	0.0148112	0.012124	0.0175899	0.0155763	0.00957293	0.00342645	-1.40813e-05	0.0120512	0.00976537	0.00220137	-0.00423143	-0.00866938	-0.0185826	-0.0175594	-0.0101972	-0.00526406	-0.00310962	0.0166676	0.0197349	0.0154401	0.0185615	0.0158461	0.00329972	0.00873275	0.010446	-0.00324104	0.000349685	-0.000168975
		33.548	0.0241526	0.0138791	0.00828124	0.00783729	0.00204167	0.00196902	0.00973418	0.00902184	-2.07005e-05	-0.0175004	-0.00713002	-0.00524725	-0.0143846	-0.0101388	-0.00643786	-0.0111034	0.00884022	0.00412018	-0.00461966	-0.00290035	-0.00874238	-0.0170968	-0.0058809	-0.00933567	-0.0021537	-0.000420259	0.00010845	0.00117394	-0.00408894	0.00274191	0.00377914	-0.00553784	0.00936489	0.0179594	0.0391724	0.0608676	0.0673816	0.086284	0.108615	0.12353	0.138305	0.169338	0.161334	0.163558	0.142186	0.13325	0.127487
[truncated: 314 more columns]

## Sheet: Figure 6d-g
Group	Mouse#	latency to feeding onset (s)	dF/F
			time (s), food presented at 30s
			1	2	3	4	5	6	7	8	9	10	11	12	13	14	15	16	17	18	19	20	21	22	23	24	25	26	27	28	29	30	31	32	33	34	35	36	37	38	39	40	41	42	43	44	45	46	47
SON-projecting SFOVglut2	1	-0.00114696	-0.00213043	-0.00350505	-0.000208194	-0.00520935	0.00255222	0.000372946	-0.000414946	-0.00391296	0.00124466	0.00374244	0.00128377	-0.00420353	0.000138255	-0.00409736	-0.00390737	-0.00782448	-0.00684101	-0.0073104	-0.001404	0.00852567	0.0067152	0.00872125	0.00453592	0.000987614	0.016019	0.00941415	0.00152405	-0.00442146	0.000289128	0.0162314	0.00301043	0.00318924	-0.00206337	0.0107049	0.00649727	0.00263045	0.00442975	0.00226724	0.00545233	0.00150729	0.00470356	0.00522323	0.00509471	0.00865419	0.0221489	0.0139515	0.0123478
		-0.00258717	-0.00158389	-0.0156359	-0.0052344	-0.00946512	-0.00465418	0.0104616	0.0118819	-0.00853436	0.00914401	0.021534	0.0177384	0.015339	0.00658745	0.00334792	0.000199058	0.00413967	-0.000115224	0.000555648	-0.00739207	-0.0097371	0.000724877	-0.001874	-0.00592945	0.0102017	-0.00715635	-0.00354815	-0.0121788	-0.0208579	-0.00591131	0.00239903	0.00897479	0.0102803	0.0335976	0.0253658	0.0182884	0.0182522	0.00536054	0.0216851	0.00928302	0.00834018	-0.00198279	-0.0162041	-0.0127772	-0.0153942	-0.024049	-0.0262974	-0.027216
		-0.0084003	0.00509147	0.0134618	0.00928918	0.0136754	0.0071212	0.0113001	-0.00273212	-0.00904755	0.000321903	-0.00539654	-0.00703039	-0.0129751	-0.0162867	-0.0100216	-0.00876477	-0.00735087	-0.00873964	-0.01065	-0.00967595	-0.00910411	0.00208142	0.00296747	0.00693896	0.00757365	0.0116143	0.00810151	0.00729087	0.00790042	0.00441279	0.00703322	0.0058267	0.0207135	0.0275002	0.00813921	0.0167609	0.0226113	0.0180177	0.0138388	-9.28411e-05	-0.00217285	-0.00518289	-0.00555364	-0.00626374	-0.00732574	-0.00168898	-0.00405805	0.0022888
		-0.00795491	-0.00369898	0.0135825	0.015024	0.0131827	0.0125883	0.00770104	0.00965277	-0.00691855	-0.00645034	-0.00496155	0.000709521	0.00101464	-0.00939109	0.00456038	-0.000879222	0.00981586	0.00585978	0.0072644	-0.00525089	-0.000705618	0.00527058	0.00236139	-0.00209445	-0.009712	-0.0158828	-0.0050352	-0.00354115	-0.0108431	-0.0102118	-0.00505625	-0.00550867	0.00534949	0.00799038	0.0170283	0.019464	0.0127093	0.00953178	0.00981586	0.00893205	-0.000216369	-0.00467221	-0.00715002	-0.00767609	0.0019721	0.00111986	0.00374497	-0.00872824
		0.00111956	-0.000303509	0.00055732	0.00489958	0.00714854	0.00353687	0.00431828	0.00505841	0.00279039	0.0023298	0.000900381	-0.000154213	0.00209474	-0.00100234	-0.000379744	0.00207886	0.00270145	0.000541438	-0.0021427	-0.003264	-0.00388341	-0.00269541	-0.000379744	-2.08009e-05	-0.000243155	-0.00457271	-0.00588143	-0.00638331	-0.00341329	-0.00291141	-0.00244446	-0.00235234	0.000395319	0.00432781	0.00342251	-0.00210775	0.00033179	-0.00416612	-0.00350541	-0.000602099	-0.00128504	-0.0060339	-0.00131363	-0.00239364	-0.00474424	-0.00352129	-0.00481412	-0.00631978
	2	0.00358757	0.00500539	0.00472712	0.00182303	0.00277266	0.00207258	0.00179432	-0.000606252	-0.00125995	-0.00214332	-0.00247901	-0.00143662	-0.00168176	-0.00205719	-0.00202628	-0.00216762	-0.00177672	-0.00147196	-0.00290303	-0.00256734	-0.00265568	-0.00333588	-0.00288757	0.000118116	0.00102137	0.00198645	0.00295596	0.00178549	0.00023958	-0.000321363	-6.51845e-05	0.000970573	0.00136147	0.00161985	0.000190994	-0.000895557	0.000930821	0.000296999	0.00103241	0.000623848	-0.00103911	1.87361e-05	-0.000632753	-0.0019269	-0.00488399	-0.00449089	-0.0049105	-0.00698864
		0.000162494	0.00233171	0.00180694	-0.000582343	0.000102037	-0.000205088	-0.00137555	-0.00120868	-0.00210587	-0.00147711	-0.001673	-0.00112646	0.000479292	0.00212616	0.00319988	0.00259773	0.00274041	0.00192302	0.00129668	0.00165217	0.000839619	-0.000120447	-0.00250973	-0.00281202	-0.000202669	-0.000550905	-0.00117725	-0.00112404	-0.00145777	-0.000739533	-0.000691167	-0.00112162	1.98145e-05	-0.00129574	-0.00128607	-0.00199705	-0.00272254	-0.00211797	-0.00147953	-0.00223404	0.000208442	-0.000802408	0.0014321	-0.00128123	-0.00506829	-0.0052013	-0.00508522	-0.00540686
		0.00286153	0.00268949	0.00162156	0.00015289	0.00104878	0.00152295	0.00229505	-0.00188017	0.00083687	0.00180409	-0.000161824	-9.67832e-05	-0.000103077	-0.000558364	0.000664826	-9.88813e-05	-0.000371634	-0.00130109	-0.00242357	-0.000426184	0.000448722	-0.000392615	-0.00170183	-0.00178155	-0.00089406	-0.00204591	-0.00150251	-0.00151719	-0.00104932	0.000169675	-0.00112275	-0.00109128	-0.000142941	0.00354971	0.00332521	0.00287412	0.00313009	0.00151875	-0.00159063	-0.000726212	-0.00285578	-0.00236063	-0.00115003	-0.00247602	-0.00122556	-0.00155496	-0.000906648	-0.00122136
		-0.000330283	0.000733453	0.00106603	-9.9257e-05	-0.000551155	-0.00114014	-0.0033057	-0.00177229	-0.00117061	-0.00305436	0.00164994	0.00223132	0.00383327	0.00271622	-0.000817724	0.000273939	0.00119551	0.00273653	0.00465075	0.00227701	-0.000190652	-0.000789797	-0.00106144	-0.000975126	-0.00181545	-0.000919274	-0.000441988	9.36881e-05	-0.00170883	-0.00136356	-0.00195001	0.00272383	0.00337883	0.00188097	-0.000657782	0.000154618	-0.00068317	-0.00201601	-0.00185353	0.000565896	-0.00176722	-0.000558771	-0.00110714	-0.00133055	-0.00362812	-0.00705036	-0.00433136	-0.00462585
	3	0.00470059	0.00432323	0.00309432	0.00126462	0.00381429	0.00147316	0.00290564	0.000688651	-0.000354056	0.00297267	0.000738303	0.00273186	-0.000498048	-0.00191812	9.53011e-05	0.000504936	-0.000383847	4.56484e-05	-0.00111374	-0.00129249	-0.000259716	0.000971671	0.0013962	-0.000728933	-0.00235506	-0.00352934	-0.00542856	-0.00430641	-0.00513313	-0.00182626	-0.00408049	-0.0123998	-0.0138472	-0.0140036	-0.011866	-0.0121292	-0.0153591	-0.0150935	-0.0125488	-0.0120845	-0.0123626	-0.0129311	-0.0123228	-0.0131322	-0.0135915	-0.0142394	-0.0136287	-0.0144529
		0.00106811	0.00189696	0.0110769	0.00523917	0.00055874	0.00179866	0.000766511	-0.00156589	0.000739702	0.000851407	0.00130493	0.000724063	6.27709e-05	0.00355243	0.00194611	0.00475661	0.00131833	-0.00388264	-0.00866138	-0.00523651	-0.00042873	0.00105918	-0.000580649	-0.0010364	-0.00491703	-0.00585535	-0.000853209	-0.000795122	-0.00133801	-0.00175355	-0.00320571	-0.00786827	-0.00488799	-0.00604525	-0.00669984	-0.00391392	0.00443043	0.00630484	1.36208e-05	-0.000929168	-0.000991723	-0.000625331	-0.00466011	-0.00302922	-0.00317443	-0.0058978	-0.00654792	-0.00658813
		0.00505058	0.000561953	0.00314934	-0.00170107	-0.00831549	-0.00900662	-0.00661884	-0.00656894	-0.00285878	0.00364835	-0.00033627	-0.000912631	-0.000241458	0.00456653	0.000739103	0.000973639	0.00255551	-0.000905145	0.00198414	0.00170968	0.00220121	0.000302466	0.00363837	0.00130548	0.00212137	0.00240331	0.000267535	0.000382308	-0.00121952	-0.00164867	0.00202157	-0.00622213	-0.00319312	-0.00108729	-0.000456034	-0.00148151	-0.00691576	0.00168723	-0.00461531	-0.00223751	-0.00260678	-0.00217264	-0.00571314	-0.00527899	-0.00791378	-0.00822068	-0.00856001	-0.00904654
		0.00137578	0.00812068	0.0116295	0.00803626	0.00491923	0.00308581	0.00235418	-0.00157024	-0.00237764	-0.00137976	-0.00222179	-0.000925193	-0.00485827	-0.000903547	-0.00695794	-0.00427816	-0.00280407	-0.00201615	-0.00329327	0.00120261	-0.000306117	-0.00261575	-0.00395996	-0.00279108	-0.00333007	-0.00104425	-0.00284087	-0.00108754	0.00536298	0.003588	0.00188662	-0.00750342	-0.00500763	-0.00424569	0.00186065	-0.00153777	-0.00376731	-0.0024231	-0.00599902	-0.0036461	-0.00743631	-0.00804673	-0.00771338	-0.0113304	-0.0132418	-0.013547	-0.0155471	-0.0156207
		0.00357948	0.0056065	0.00488167	0.0060464	0.000742648	-0.0011919	-0.00896757	-0.00640067	-0.00619072	0.00154746	0.0116426	0.00975552	0.00844583	0.0126423	0.00922565	0.00429931	0.00169492	0.00200735	0.00316708	0.000245265	-0.00846268	-0.0159309	-0.0124467	-0.0120168	-0.00529343	-0.00536091	-0.00264405	-0.00443613	-0.00268405	0.000217771	-0.00491102	-0.00514097	2.82192e-06	0.00271468	0.00267969	0.000735149	0.0131197	0.00877076	0.00327205	0.000482709	0.00227229	-0.00649815	-0.00028711	-0.00824773	-0.0062582	-0.00179176	0.00278217	0.00504663
	4	0.00992221	0.00440983	0.000817739	0.00340513	0.00426669	0.00563061	0.00220866	-0.00398432	-0.00205864	-0.00557781	-0.000638004	-0.0029148	-0.00764934	-0.00769795	-0.0110875	-0.00256909	0.00368871	0.00251926	0.00158477	-0.0032605	-0.00743057	-0.00419229	0.00427209	0.0122962	0.00821259	0.00349966	0.000312686	-0.00349818	-0.00319568	-0.0078546	0.0036563	0.0264458	0.0267132	0.0153914	0.0123124	0.00814777	0.00437472	-0.000224778	0.00552797	0.00267861	0.00342943	-0.00065691	0.00271102	0.0023302	-0.00703895	-0.00495392	-0.00861623	-0.0102097
		0.00410246	0.000116671	-0.000715091	0.00191778	0.00421294	0.00628297	0.0044089	0.00300387	-8.55365e-05	-0.00247034	0.0019282	0.000664926	-0.00806337	-0.00356685	0.00357922	0.00381478	-0.00077346	0.00290797	0.00023341	-0.00099026	0.00105266	0.00370638	0.00202201	-0.00178867	-0.00181577	-0.00445698	-0.0062018	-0.00449242	-0.00532835	-0.00602461	0.00281834	0.0168666	0.0206981	0.0137522	0.00669364	-9.17904e-05	-0.000890199	-0.00272049	-0.00436526	-4.38442e-05	0.00192403	-0.00376072	-0.005172	-0.00198879	-0.00317285	-0.00711695	-0.0100917	-0.0131769
		0.0107689	0.00461615	-0.000270416	-0.00307677	-0.00260129	-0.000254911	-0.000590846	-0.00105082	-0.00257545	-0.00103273	-0.000544332	0.00210956	0.00155656	-0.000596015	0.000308427	0.00238348	0.00143769	0.000874349	0.00105524	0.00329567	0.00260054	0.00450245	0.00193384	0.00217158	-0.00734315	-0.00883677	-0.0105113	-0.00395279	0.00214574	-0.000763982	0.00224135	0.0121644	0.0260282	0.022506	0.0190614	0.0107198	0.00754655	0.00510714	0.00793416	0.0110454	0.00591855	-0.000601183	-0.0037228	-0.00757314	-0.0076765	-0.00777212	-0.00981615	-0.0152971
	5	-0.0047616	-0.0102333	-0.0140534	-0.0110514	-0.0030097	-0.00103273	0.000627921	0.00675957	0.0084476	0.00904373	0.00661358	0.00700897	0.00580758	0.0118267	0.00246498	0.000707	0.000256859	0.000688751	-0.00234362	-0.00208509	0.000281191	0.00119972	-0.00661387	-0.00108444	-0.000801581	0.00164074	0.0024589	0.00050322	0.0020483	-0.00312224	-0.00819241	-0.00249569	-0.00882504	-0.00620631	-0.0106256	-0.00879158	-0.00949417	-0.0108233	-0.00750807	-0.00823499	-0.0182415	-0.0189654	-0.018281	-0.012636	-0.0127273	-0.0134907	-0.0097527	-0.0145522
		0.00338736	0.00662052	0.00410808	-0.00719675	-0.00354148	-0.00765254	-0.00262991	0.00122294	0.0018067	0.00389703	-0.00347637	0.00129029	0.000594267	-0.00337309	-0.00706204	-0.00140401	-0.00321817	0.00123865	0.00116905	-0.00200573	-0.00174753	0.00367475	0.00741309	0.000107048	3.96902e-05	-0.000490189	0.00296974	-6.80818e-05	-0.000566527	0.00021482	-0.00224822	0.00739064	0.0119193	0.0133518	0.00663174	0.00175282	0.000859207	0.00644539	0.00578753	-0.000835957	-0.00127827	-0.000288116	0.00563036	0.0142252	0.0172585	0.00967181	0.00710549	0.00820117
		-0.00741346	-0.0120642	-0.00690352	-0.00490557	-0.00402224	-0.00200478	-0.000502836	0.000737175	-0.00212182	0.00556068	0.00589228	-0.000594792	0.00521236	-0.00334232	-0.00360147	0.00125547	0.00381352	0.000687017	0.00330358	0.00564427	0.0057836	0.00283544	0.00528202	0.00108271	0.00197161	3.21801e-05	-0.00276272	-0.00210788	0.00402251	0.00700968	0.0119864	0.0156368	0.00926399	0.00645794	0.00131399	8.51244e-05	4.33262e-05	0.00289953	0.00817445	0.000238384	-0.00127749	0.00248712	-0.0011939	-0.00169548	0.00636878	0.00137251	0.000831917	0.00460211
	6	0.00138462	0.00344623	0.00387521	0.00316847	0.00333512	0.00266232	-0.00140842	0.00206977	0.00519303	0.00218087	0.000214941	0.00288762	0.00248641	0.00171485	0.000816756	-0.00317066	-0.00202566	-0.000149234	-0.00178494	-0.00151952	-0.00305955	-0.00228799	-0.00384037	-0.00266143	-0.00151026	-0.00396382	-0.00143928	-0.00231268	-0.00166457	-0.000933137	-0.0017047	-0.00168309	-0.000278856	-0.00312128	0.00452332	0.00566523	0.00252036	0.000393943	-0.000948568	-0.00368914	-0.00525695	-0.00579704	-0.00512733	-0.00579395	-0.00401011	-0.00548533	-0.00380333	-0.00539583
		0.00126518	0.00402895	0.00363194	0.00205047	0.00189777	0.00312369	0.00288592	0.0021748	0.00403549	0.00130663	0.000359922	0.000442813	0.00104705	-0.00209409	-0.00190432	-0.00241911	0.000410093	0.00221625	0.00332219	-0.000743839	-0.000141788	-0.000519161	-0.000759109	-0.00251946	-0.0055668	-0.00502364	-0.00170145	0.000163601	-0.00666183	-0.00622338	-0.00207446	0.000798373	0.00293827	-0.00128481	-0.00305607	-0.00340726	-0.00532685	-0.00600525	-0.00554717	-0.00552753	-0.0068298	-0.00608596	-0.00349888	-0.00588091	-0.00727915	-0.00821495	-0.00901987	-0.0097179
		0.00332466	0.000737012	0.00493649	0.00526466	0.00191321	0.00311846	0.00257537	0.00110585	0.00227334	0.000426262	9.80871e-05	8.06619e-05	-0.00091548	-0.00101422	-0.00219623	-0.00218171	-0.00284387	-0.00259701	-0.00274513	-0.00307621	-0.00317495	-0.00444409	-0.00320109	-0.00194938	0.000310094	-0.0005147	-0.000331735	7.77577e-05	-0.001415	0.00181447	0.00209327	0.00545053	0.00608075	0.00283094	0.00151243	-0.000898054	-0.000244609	-0.000195237	-0.0010665	-0.00346827	-0.00455445	-0.00620403	-0.00677035	-0.00576259	-0.00455445	-0.00569289	-0.00512077	-0.00518175
	7	-0.00340244	-0.0020516	0.00157683	0.00344602	0.00609273	0.00118414	0.000426255	-0.000421948	-2.92615e-05	-0.00116805	-0.00353596	-0.00449411	0.000504793	-0.000414095	0.00294731	0.00368948	-0.000995271	-0.00372052	-0.00427813	-0.00212228	-0.000496559	0.000127813	-0.00282519	-0.00252282	0.000359499	0.00112917	0.00182815	-0.000767513	0.00115273	0.00613592	0.00264494	-0.0027977	-0.00364591	0.00438454	0.00197344	0.00826429	0.00482435	0.00767918	0.0061477	0.00751818	0.00943449	0.0103848	0.00583355	0.00809543	0.00740038	0.00719618	0.00928527	0.00767918
		0.00468121	0.00238034	0.00324515	0.00454237	0.00345144	0.00387591	0.00478039	0.00336813	0.00271754	0.00260646	0.00382037	0.00213835	-0.000301366	-0.00261414	-0.00246339	-0.00341944	-0.00232851	-0.00124948	-0.000293432	-0.00386772	-0.00319729	-0.00107493	-0.00245149	-0.00286406	-0.00479997	-0.00567668	-0.00182867	-0.00157081	-0.00421285	-0.0025705	-0.00787044	-0.004435	0.00109899	-0.000610793	-0.0036892	-0.00076154	0.00122197	-0.00187231	0.00101965	-0.00390342	-0.00338771	-0.00717621	-0.0066486	-0.0103498	-0.0092232	-0.00936204	-0.0105799	-0.00624396
		0.00253271	0.0034095	0.00767458	0.00228379	-0.00124568	-0.00197015	-0.000246284	0.00142928	-0.00188098	-0.00332249	-0.00207789	-0.00266861	0.000571066	-0.00156519	-0.000472912	0.00063794	0.0051185	-0.000625237	-0.00322218	-0.00457452	0.000782834	0.00402623	0.000686238	-0.00116394	-0.00112308	0.000455894	-0.00301784	-0.00613492	-0.000725548	0.000307285	-0.00881731	-0.00886932	-0.00563336	-0.00410269	-0.00648786	-0.00443334	-0.0045448	-0.00322218	-0.00315531	-0.00244941	0.000229265	-0.00147974	-0.00284694	-0.00487917	-0.00438505	-0.00575225	-0.00328534	-0.00286923
		0.00204731	-0.000885917	-0.00114572	0.00431009	0.00107516	0.00350555	0.00555043	0.00204731	0.0017079	0.00164504	-0.0022813	-0.00263328	-0.00428846	-0.000261558	-0.000244796	-0.00177846	-0.000571642	-0.00134266	-0.000198703	-0.00337497	-0.0005465	-0.000508787	-0.00280509	-0.00236091	0.00268424	0.002965	-0.00257881	-0.000764397	-0.00202569	-1.01379e-05	0.00306975	-0.00029089	-0.00446446	-0.00636268	-0.00588917	-0.00277995	-0.00238605	0.00387849	0.00433523	0.00903678	0.0066902	0.00683686	0.00588985	0.00524034	0.00316613	0.00779226	0.00354745	0.00125534
		-0.000257358	0.00291593	0.000635895	-0.00135047	0.00171269	0.00126811	0.00598725	0.00837742	-4.11825e-05	-0.000522478	0.00478809	0.00102338	0.000505374	-0.000473533	-0.00102417	-0.000106443	-0.00085286	-0.00107719	-0.000824308	-0.00323487	-0.00127705	-0.00145244	-0.00290041	-0.000461297	-0.00269239	-0.000285909	-0.00239056	-0.00460941	-0.00213767	0.00237753	-0.0039772	-0.00188479	-0.00235385	0.00351959	0.00418035	0.00285883	0.00599949	0.0038255	0.00419667	0.0054978	0.00254068	-0.000273673	0.00051761	0.00041972	0.000725628	-0.00113837	-0.00122403	-0.000771284
		0.00472465	0.00413718	0.00335389	-0.00217617	0.00334214	0.00340872	0.00437609	0.00423509	-0.00059783	-0.00576365	-0.00125971	0.00204187	0.00573902	0.00438392	0.000287292	0.00139957	-0.000828902	0.0031659	-0.00167094	-0.00183543	0.00133299	0.00237869	0.000338206	-0.00103647	-0.000644828	-0.00143204	-0.00657045	-0.00427931	-0.00809395	-0.00653128	-0.00592423	-0.00492553	-0.00265006	0.002739	0.00105492	0.0068043	0.00654581	0.00336564	0.00289566	0.00557061	0.00494006	0.00754451	0.00916201	0.00732519	0.00413718	0.00215545	0.00238652	0.00426643
		-0.00499853	-0.00419272	-0.00333106	-0.00296007	0.00230161	0.00376961	0.00622693	0.000446655	0.0016793	0.00812576	0.0095419	0.00759121	0.00151974	0.00471105	0.00596364	0.00819756	0.0034784	-0.00341085	-0.00616336	-0.00694922	-0.00396933	-0.00550515	-0.00624314	-0.00331112	-0.00695321	-0.00601576	-0.000949545	0.00342655	0.000175394	-0.000474837	-0.00433234	-0.00396135	-0.00438021	-0.00580034	-0.000682272	0.00133225	-0.00226596	-0.00380577	-0.00338691	-0.00578439	-0.00534558	-0.00487486	-0.00576843	-0.00496661	-0.00400523	-0.00501847	-0.00665003	-0.00527378
		-0.00139721	-0.0044771	-0.000228194	0.00396076	-0.00475437	-0.00892459	-0.00726474	-0.00393006	0.00267185	0.00605899	0.00613767	0.00432046	0.00272806	0.00179509	0.00260441	-0.00043427	-0.00355913	-0.000306878	-0.00582221	-0.00344672	-0.0033568	0.00206112	0.00835205	0.00279175	-0.0015171	0.00203864	-0.0013485	0.00128927	0.0059316	-0.000100802	-0.00187305	-0.0077256	-0.00852368	-0.00977887	-0.006669	0.00587539	0.00831458	0.00535458	0.00117312	0.0022597	0.00538456	0.00500613	0.00518223	0.00332755	0.00100077	-0.00195923	-0.00204915	-0.000872649
		-0.00302356	0.000359012	-0.00186844	-0.00258201	-0.00114698	-0.000445236	0.000189489	0.000571901	7.51598e-05	0.00237752	0.000291991	-0.000827648	-0.00115092	0.000473341	-0.00296837	-0.00140324	-0.000835532	0.000335357	0.00052065	0.000516707	0.00130124	0.00162846	0.00103316	0.00110807	-0.00165949	-0.00242826	0.00155356	0.00483757	0.00243665	-7.07087e-05	0.000800559	-0.00288952	-0.00353607	-0.00709999	-0.00555457	-0.0029526	0.00675751	0.00302407	0.00570489	0.00555508	0.00355629	0.000299876	0.000224971	0.00224742	-0.00164372	-0.000934092	-0.00137564	-0.0012692
SON-projecting MnPO/OVLTVglut2	1	41.919	0.0151221	0.0140194	0.00148271	-0.00524316	-0.00877352	-0.00840692	0.00893601	0.0202026	0.0189613	0.0101513	0.00161549	-0.00800567	-0.00811825	-0.0107509	-0.0130313	0.00966344	0.00444729	-0.00379118	-0.00827413	0.00273551	0.00681144	0.00130085	0.0118486	0.00207736	0.00408646	-0.00404521	-0.0184784	-0.0131439	-0.012249	-0.00759	-0.00356025	-0.00351118	-0.0172112	-0.000979595	-0.0138771	-0.00750051	-0.00980982	-0.0195349	-0.0057541	-0.00673555	-0.00505553	-0.00334664	-0.013066	-0.0108115	-0.000581239	-0.0135942	-0.0174969
		41.468	0.01454	0.023757	0.0115009	0.00918685	0.00251492	-0.00817724	-0.00641061	-0.00863933	-0.0107401	0.00100422	0.0120874	0.02177	0.00980179	-0.00325415	-0.00135601	0.00799251	-0.000353623	-0.00449114	0.00351375	-0.0117922	-0.00322216	-0.00404682	-0.00445915	-0.0100292	-0.0101145	0.00070564	-0.00769381	0.000961569	-0.00432763	-0.00532291	-0.014906	-0.0246171	-0.029263	-0.0177497	-0.00496035	-0.00851847	0.00274596	-0.00846871	-0.00489637	0.00217723	-0.0148812	0.00496046	0.00557896	0.0154322	0.0133884	0.0147035	-0.00270319
		39.652	0.0218414	0.013472	0.00856759	-0.00239501	-0.00493996	0.00414174	0.00760674	0.000992085	-0.000284102	0.00102547	0.00261329	0.0023165	-0.00312214	-0.000922196	-0.00944371	-0.00673924	0.00526212	0.00982894	0.00388948	-0.00570048	-0.0102005	-0.013135	-0.0046172	-0.00448365	0.00366317	-0.00289954	0.00400448	0.00037254	0.00338494	-0.00969598	-0.0144038	-0.0117141	0.00256877	-0.00681343	-0.00878707	-0.00384556	-0.0132389	-0.0211594	-0.0203395	-0.00259163	0.00528438	0.00978813	0.0111942	0.00237215	0.00691671	0.00204568	-0.00826398
		42.292	0.0247805	0.0203677	0.0121429	0.000797412	0.00378457	0.00711026	0.00128375	0.0022445	-0.0018989	-0.00308614	-0.00530088	-0.00313143	0.00276899	-0.00576576	-0.00391577	0.00475486	0.00980657	0.00486691	0.00365584	-0.00598509	-0.0086361	-0.00801626	-0.00213253	-0.00721524	-0.0168895	-0.0183271	-0.0104313	0.00399198	-0.00653103	-0.0165915	-0.014794	-0.0180935	-0.0118354	-0.00761336	-0.00319103	0.0110463	0.00502426	-0.0014221	0.00413264	0.00707212	-0.0034795	-0.00870524	0.00305268	0.00171764	-0.00553213	-0.0213953	-0.0211116
		35.278	0.00574117	0.0153998	0.0103669	-0.000223343	0.0071249	0.00862103	-0.00490654	-0.00424964	0.00182228	0.00420509	0.00189471	-0.0101717	-0.00606048	0.00198213	0.00660038	-0.00393243	-0.0035278	0.00131774	0.00743711	-0.00109754	-0.00314815	0.00262654	-0.00992942	-0.00989695	-0.0114905	-0.00210162	0.000456032	-0.00360773	0.000328649	-0.0125345	-0.0280353	0.0103869	0.0130719	0.0100797	0.00532406	0.0198607	0.0118231	0.00336336	0.00878587	0.0122827	0.0125524	0.0047346	0.00514422	0.00385041	0.0043	0.00243172	0.00199212
	2	38.072	-0.00488309	-0.00590045	-0.00637937	-0.00626029	-0.00351106	0.00543039	0.00720885	0.00992442	0.010978	0.0112939	0.00421369	0.000472985	0.00420334	0.000825052	-0.00237979	-0.00576584	-0.00307616	-0.00273186	-0.00841669	-0.00273444	0.00405578	0.00486087	0.00508868	0.0057954	0.00230839	-0.00124075	-0.00176626	-0.00347741	-0.00633536	-0.00619816	-0.00560275	0.000843173	0.0136574	0.0198289	0.0158526	0.0120523	0.00907014	0.00869995	0.0192878	0.014566	0.00567114	0.00391599	0.00332058	0.00319115	0.000718914	-0.00249628	-0.00210021
		36.615	-0.00385168	0.00201883	0.00192339	-0.00100819	0.00101553	0.00661196	0.0048305	0.00478645	0.00259144	0.00375135	0.00365346	0.00142908	-0.000486965	0.000890731	0.000614213	3.18118e-05	-0.00221459	-0.00247887	-0.000413553	0.00231981	0.00222193	-0.000269177	-0.000924989	0.000506542	0.00064113	-0.000484518	-0.00389572	-0.00443163	-0.00683709	-0.00916669	-0.0033745	0.0121203	0.0252977	0.0381864	0.0311535	0.0190308	0.0151302	0.0177559	0.0141098	0.00759079	0.00462739	0.00107915	-0.00389572	-0.00576038	-0.00545695	-0.00434109	-0.00269911
		38.365	0.00744817	0.00872574	0.00525596	0.00100726	0.000246033	-0.00116725	-0.00379909	-0.0059795	-0.00500584	-0.00137674	-0.00311457	-0.0020524	-0.000934163	-0.00097547	-0.00397317	-0.0020406	0.000977754	0.0021786	-0.00207305	-0.00300246	-0.000990222	-0.00315588	0.00190126	0.00669875	0.00919781	0.00144983	3.6548e-05	-0.00348634	-0.00278412	-0.00212321	0.00291032	0.00668695	0.0170284	0.0220206	0.0136855	0.00768716	0.00586376	0.00438262	0.00119019	0.0042587	0.000538131	-0.0014387	-0.00428297	-0.00828088	-0.0100482	-0.00922208	-0.0090067
		34.881	0.00202587	0.00140225	0.000157527	-0.000307673	0.00136705	0.000318461	0.00427894	0.0137288	0.00920755	0.00836013	0.00617495	0.00946152	0.00270984	0.000808807	-0.000156797	-8.43605e-06	-0.00396641	-0.0032246	-0.000337848	-0.00186169	-0.00465037	-0.00348612	-0.0022942	-0.00333021	-0.00345846	-0.00424301	-0.00329249	-0.0054651	-0.00971225	-0.00854799	-0.00795706	-0.00212069	0.0149182	0.0161805	0.0106107	0.0102586	0.00365533	0.000351151	-0.00442406	-0.00630749	-0.00824876	-0.010967	-0.0125864	-0.0136149	-0.0144472	-0.0164111	-0.0169266
		267.475	0.0109786	0.00955466	0.00648504	0.0082806	0.00575433	0.00737189	0.00978574	0.00794335	0.00922365	0.00851168	0.00884268	0.00931109	0.00424607	0.00591047	0.00415239	0.0052953	0.00630393	0.00625396	0.00499552	0.00108277	-0.00937828	-0.00830719	-0.00319221	-0.0152739	-0.0165636	-0.0136533	-0.0147681	-0.0170383	-0.0158922	-0.0126665	-0.0135502	0.00360591	0.0160811	0.0105258	0.00344041	-0.00345139	-0.00558107	-0.00719239	-0.00973114	-0.0152896	-0.0195146	-0.0224499	-0.0223188	-0.0200829	-0.0243985	-0.0267811	-0.0284268
		266.089	0.000406811	0.000743372	0.002639	0.00380459	0.00285678	0.00295824	0.00142144	-0.00112009	-0.00282269	-0.000976554	-0.00152842	-0.00117453	-0.00197386	-0.00277072	-0.00396601	-0.00259749	0.000349893	-0.000112879	0.000666656	-0.00100625	0.00148826	0.00447524	0.0037353	0.000530547	0.000357317	7.51994e-05	0.000446407	-0.003429	-0.000283634	-0.00215947	0.000206359	0.00570518	0.00986765	0.00837539	0.00674208	0.00412631	0.0019931	-0.000439541	-0.00354283	-0.00523554	-0.0046812	-0.00607694	-0.00644815	-0.00776965	-0.0084007	-0.00686885	-0.00743556
	3	50.311	0.00451448	0.0111371	0.00856392	0.000834111	-0.00435327	-0.00113679	0.00343549	0.00753106	0.00264867	0.00125187	-0.00364333	-0.0063908	-0.00871025	-0.0125572	-0.0133466	-0.0115884	-0.00352544	0.00524236	0.00165938	0.00676218	0.00875101	0.0133258	0.0074311	0.00670579	-0.00284626	-0.00206969	0.00169526	-0.00255152	-0.00798494	-0.00938687	-0.0013982	0.00675192	0.00914058	0.00776172	-0.00269249	-0.0062037	-0.00154942	0.00404034	0.00392245	0.000828985	0.000316398	0.000206192	-0.00521185	0.000244636	0.00103146	0.00617526	0.00753875
		45.421	0.00139555	-0.00997091	-0.0155893	-0.0145133	-0.00468955	0.00388974	0.00242226	0.00182076	0.00345157	0.00227707	0.00543241	0.00864219	0.0133869	0.0126739	0.00551537	0.000991086	-0.00878086	-0.0173835	-0.0136707	-0.0052081	-0.00562034	-0.00172867	0.00104813	0.0121657	0.00728879	0.0015926	0.00949001	0.00734065	0.00177409	-0.00396878	-0.00147459	0.000998864	0.00040254	0.00283191	-0.00735746	-0.0220893	-0.0282081	-0.0294448	-0.0214566	-0.00867456	-0.0103391	-0.0184232	-0.0214489	-0.0264243	-0.0255661	-0.0283455	-0.0242646
		35.735	-0.00989265	-0.00673379	0.00667086	0.0128463	0.00640079	0.00472973	0.000591868	-0.000507704	-0.0040789	-0.00359663	-0.00568003	-0.00629492	0.0168805	0.0139242	0.00671668	0.000951158	2.76138e-05	-0.00399209	-0.00589223	-0.00427422	-0.00240302	-0.00187252	-0.0043345	0.000160238	-0.000842881	-0.00265862	0.00824305	0.00284165	0.00059669	-0.00613336	-0.0123932	-0.0034833	0.00707597	0.00302732	-0.00393422	-0.00900045	-0.00568003	8.78973e-05	-0.00412472	-0.0105919	-0.021115	-0.0255519	-0.0307049	-0.0325496	-0.0332513	-0.0391832	-0.0383441
		37.705	0.000526623	-0.0029915	-0.00682043	-0.00104948	0.0141406	0.0183046	0.0101243	0.00131357	-0.00620101	-0.00667053	0.00400947	0.0102786	0.0136997	0.00552165	0.000121025	-0.00330672	-0.00673446	-0.00625391	-0.00972795	-0.0156422	-0.00131179	0.00871793	0.0042762	-0.00240735	-0.0083811	-0.0140154	-0.011163	-0.0141322	-0.00104507	0.0269676	0.0318106	0.0271462	0.0331133	0.0362369	0.0344051	0.0301044	0.0241747	0.0216331	0.0245318	0.0238595	0.0166535	0.0094123	0.0107173	0.0120531	0.00898025	0.00577735	0.00284118
		33.99	-0.0151738	-0.00490297	0.00196343	0.00426893	0.00562819	-0.00251738	-0.00707329	-0.00889816	-0.0103751	-0.0154517	-0.0128583	-0.0135617	-0.01612	-0.00865534	0.00714015	0.0136486	0.0139465	0.000551603	-0.00305808	-0.00479784	-0.000587375	0.0147075	-0.0020743	0.00212615	0.00794369	0.00849691	0.000486518	0.00456181	0.0126072	0.0217917	0.00623648	-0.00512827	-0.0015286	-0.00520336	-0.0090058	-0.0024548	-0.006853	-0.00921357	-0.016831	-0.0235647	-0.0221103	-0.0234946	-0.0252569	-0.0292821	-0.0351372	-0.0391699	-0.0365641
		33.847	0.00436058	0.00507629	-0.000425472	-0.00128238	0.0178886	0.0210119	0.0232419	0.015722	0.00406845	0.00656615	0.00210388	0.000482563	0.00540007	0.000599415	0.00542442	0.00813148	-0.00191533	-0.00963971	-0.00338571	-0.00183986	-0.00631674	-0.0118063	-0.0139657	-0.0100876	-0.00500703	-0.00610008	-0.00875359	-0.0107693	-0.011614	-0.012561	-0.0159473	-0.00912362	0.00204789	0.00345011	-0.00145036	-0.00347335	-0.00653584	-0.0128556	-0.0159887	-0.0173592	-0.022491	-0.0205045	-0.0220576	-0.0241878	-0.0249984	-0.0238104	-0.0238859
	4	53.377	0.00242757	0.00359905	0.0042943	0.00422045	0.00289362	0.00131212	0.00104981	0.000255244	0.00238428	0.00303878	0.000453886	-0.000552057	0.00244031	0.0027943	0.00674167	0.00703709	0.0014471	-0.00129569	-0.00414544	-0.00451471	-0.00540351	-0.00646548	-0.00366921	-0.00326174	-0.00263271	-0.00261488	-0.00201131	-0.0021743	-0.00483814	-0.00578296	-0.0068755	-0.00850538	-0.0096081	-0.0129977	-0.0116047	-0.0127966	-0.0100436	-0.00812338	-0.00600962	-0.0107541	-0.0128373	-0.00827363	-0.00703848	-0.00493237	-0.0084137	-0.00471335	-0.00454782
		38.439	0.00894143	0.00700543	0.0035917	0.00219635	0.00330851	0.00448246	0.00412204	0.00295838	0.000363331	-0.00265136	0.00337802	0.00100952	-0.000506836	-0.0026771	-0.00642294	-0.00999372	-0.00293712	-0.00112728	0.00241775	0.00257222	0.0019595	-0.0031508	-0.00182238	-0.0018507	-0.00242738	-0.000136114	0.000319565	0.000844755	-0.00237847	-0.0042604	-0.00712834	-0.00748104	-0.0116594	-0.0139996	-0.0120353	-0.0117109	-0.0108175	-0.01168	-0.0141824	-0.0117546	-0.0138065	-0.012908	-0.00967706	-0.00470063	-0.00690179	-0.00388195	-0.0047341
		38.051	0.00475531	0.00607527	0.00201593	0.00351786	0.00463885	0.00546867	0.00237261	-0.000327953	0.00133897	0.00161315	0.000678995	0.00208387	-0.000985502	-0.00380981	-0.00291205	-0.00227391	-0.00182503	-0.000796244	-0.00181775	-0.00387289	-0.0066875	-0.00612215	-0.00602509	-0.00113351	0.000458195	0.00366587	0.00299376	-0.000480815	-0.00246559	-0.00446978	-0.0086747	-0.0121711	-0.0144786	-0.0122755	-0.011977	-0.0116106	-0.0114408	-0.00935894	-0.00823795	-0.0127437	-0.0112297	-0.0105115	-0.0095118	-0.011516	-0.011795	-0.0104629	-0.00920365
		34.802	0.00821525	0.00769527	0.00448323	0.000174177	-0.00553904	-0.0098086	-0.0061775	-0.00597565	-0.00475359	-0.0030598	-0.00353371	-0.00371582	-0.00582207	-0.00519239	-0.00682693	-0.00340646	-0.00150644	0.00085871	0.00266219	0.00382941	0.00420459	0.00311855	0.00228702	0.00266219	0.00379869	0.00479916	0.00588959	0.0046763	0.0025876	0.00283552	0.000540578	-0.0067282	-0.00940271	-0.00939174	-0.00967696	-0.0101289	-0.00686204	-0.00887176	-0.00613801	-0.00435208	-0.00677866	-0.00700684	-0.00413926	-0.00377067	-0.00390011	-0.00357979	-0.00583085
		36.011	-0.00302092	-0.0020298	-0.000634599	0.00234132	0.000143053	0.00015576	0.00224475	-5.00891e-05	0.00011764	-0.00226614	-0.00260668	-0.00209587	-0.00101834	0.00188642	0.00153063	0.000244707	0.00488267	0.00239215	0.000727563	-0.0013233	7.44369e-05	0.000247249	0.000145595	0.0032435	0.00179493	-0.000487201	-0.00210096	0.00158908	-0.001397	-0.00116574	-0.00528018	-0.00967417	-0.0142308	-0.0132702	-0.0120478	-0.0112879	-0.0100782	-0.00893972	-0.0124265	-0.00748861	-0.00528018	-0.00420519	-0.00474396	-0.00512516	-0.0012369	-0.0038367	-0.00356986
		35.307	-2.14057e-05	0.000567332	0.00330646	0.00296718	0.002588	0.00280753	0.000552364	0.00307944	0.00290232	0.0024957	0.000382728	0.000744452	-0.000552766	-0.000797242	-0.00162048	-0.00319709	-0.00130116	-0.000338226	-0.000670015	-0.00155811	0.000295415	-0.000455475	-0.00262333	-0.00214934	-0.00143088	-0.000789758	-0.000911996	-0.000143644	-0.000512852	-0.00180508	-0.00181007	-0.00525518	-0.00765753	-0.00742303	-0.0059936	-0.00510301	-0.0038008	-0.00180508	-0.00132611	-0.000767306	0.0015128	0.000120789	-0.000121192	0.00174231	-3.13843e-05	0.00015322	-0.000285839
	5	40.635	0.00375733	0.00243596	0.00294806	0.0029401	0.0048001	0.00536792	0.00373876	0.00548732	0.00254475	-0.000644596	0.00223696	0.000666165	0.00187079	0.00199019	0.00117561	0.00264557	-0.000315579	-0.00105321	-0.00409927	-0.00142468	-0.00242766	-0.00616624	-0.00796257	-0.00147245	-0.000992186	-0.00274075	-0.00351023	-0.00233213	-0.00382863	-0.00386843	-0.00176697	0.0130043	0.0306837	0.0180324	0.00478153	0.0118819	0.00522199	0.000875781	0.00236166	0.00309134	0.00244392	0.0120783	0.00868993	0.00623823	-0.000586222	-0.00154409	0.00287642
		36.939	0.00165224	0.00255307	0.00112154	0.00741648	0.00197611	-0.0101429	0.00139097	0.00686128	0.00350289	0.00699464	-0.000775377	-0.004972	-0.00535302	-0.00380174	-0.00695329	-0.00627018	-0.00114006	-0.00791943	-0.00053316	0.00612374	0.00419961	0.00117053	0.00112154	-0.00173336	-0.000108598	0.00129028	-0.00153469	0.000631662	-0.00193476	-0.00223413	-0.00449301	-0.00608783	-0.00656955	-0.00220691	-0.0113676	-0.0100232	-0.00367655	0.0027082	0.000544573	-0.00866242	0.00153522	0.00983321	0.00711438	0.0168956	0.0126255	0.0123996	0.0128841
		36.052	0.00666908	0.00503116	-0.00109383	-0.00236865	0.00237814	0.00318915	0.00638814	0.00678834	0.00903585	0.00315735	0.00413003	0.00154858	0.000748171	0.00458324	0.0046601	0.00435531	0.00339588	0.0020283	-0.00370709	-0.00483879	-0.00255153	-0.00434052	-0.00216723	-0.00813849	-0.0116953	-0.00897865	-0.0096598	-0.00810139	-0.00746265	-0.00323002	0.00165459	0.00259547	0.00484563	0.00446928	0.00321831	-0.00108588	0.000276407	0.00323421	-0.00156824	0.00670618	0.00771862	0.00615491	0.00474757	0.00590312	0.00691291	0.00421484	0.00520078
		34.676	-0.00481579	0.002081	-0.000414713	-0.0018716	-0.00104054	-0.00528453	0.00283605	-0.00125338	-0.00124071	-0.0009772	0.000218718	-0.00272294	-0.000989869	-0.000440051	0.00224823	0.00448297	0.00455899	0.000355539	-0.00343238	-0.000483124	0.00447791	0.00857747	0.00167308	0.00398636	0.00259282	-0.00115456	-0.00429638	0.00176936	-0.0014358	-0.00105828	-0.000379241	0.00545592	0.00675826	0.00429801	0.0112734	0.00838744	0.00440443	0.00441963	0.00783762	0.0130622	0.0104676	0.0123882	0.0153831	0.0161482	0.014215	0.0146736	0.0110859
		34.771	0.00574073	-0.000289602	-0.00265483	-0.00201054	-0.00145102	-0.00692749	0.00243733	-0.00719877	-0.00675229	-0.0100048	-0.0103213	-0.01031	-0.0081539	0.00438715	0.0104147	0.00284707	0.00512187	0.00500884	0.00208127	0.00650088	0.00627481	0.00351397	0.00576051	0.0143482	0.00177891	0.00400001	0.00283577	0.00166022	0.00104137	-0.00717051	-0.0125085	-0.0139469	-0.015908	-0.00912316	-0.00617016	-0.000252867	0.00195128	0.0057153	0.00458779	0.00460757	0.00318335	0.00604027	0.0116382	0.0065913	0.0129551	0.00962908	0.00550901
		35.023	-0.0017492	0.0121518	0.0128218	0.0148111	0.00882245	0.00999576	0.00682426	0.00133594	0.00115131	-0.00213633	-0.00939057	-0.00668661	-0.0109421	-0.0047718	0.0103382	-0.00258897	-0.00713032	-0.00171942	-0.00367592	-0.000313835	0.00178561	0.00273259	0.000293662	-0.00584981	-0.00614462	-0.0111386	-0.00923274	0.000942851	0.00370339	-0.00284508	-0.00139482	-0.00497727	0.0180213	0.0296322	0.0322826	0.0268806	0.0156389	0.0299568	0.0209158	0.0283875	0.0170177	0.031014	0.0320831	0.0298794	0.0298228	0.0432027	0.0482086
SON-projecting MnPO/OVLTVgat	1	49.916	49.916	-0.00516774	-0.00283612	-0.0043769	-0.00660966	-0.00432918	0.00181689	0.00413828	0.0154896	0.0181655	0.0189632	0.0104752	0.00147942	-0.00482345	-0.00494617	-0.00402238	0.000978326	0.00386899	0.0029452	0.0123433	0.00659944	0.006429	0.0144022	-0.00215436	-0.00519501	-0.00690282	-0.00823225	-0.0179916	-0.0122171	-0.0136693	-0.0134477	-0.000702213	0.0269193	0.0309451	0.0307337	0.0239093	0.00908104	0.0145113	0.0140443	0.00297929	0.0019771	-0.000913559	-0.0020521	0.0020521	-0.00399852	-0.00455757	-0.000405647
		47.373	47.373	0.00610021	0.00304062	-0.00165973	0.00285233	0.000431554	0.00251948	1.12796e-05	-0.00403008	-0.00333074	-0.00206319	-0.00121256	0.00250266	0.00907575	0.00726353	0.00318855	-0.00109824	0.00172264	0.000387845	0.00729043	0.0068836	-0.00163956	-0.0035392	-0.00209345	-0.00761417	-0.00638025	-0.00474622	-0.0081185	-0.00949028	-0.00597342	0.00189411	0.0183285	0.0168222	0.0171786	0.0259237	0.0223396	0.0118159	0.0113385	0.0125052	0.0077107	0.00140659	0.00596572	0.00597917	0.0050781	-0.000792284	-0.00131342	-0.00157568
		43.252	43.252	0.00151172	0.00711541	0.00316685	-0.00227934	-0.00480211	-0.0041804	0.00104474	0.000453426	-8.02208e-06	0.00202567	0.00563712	0.00169961	0.00212514	0.00931765	0.00706015	0.00762936	0.00723975	0.00071869	-0.00495685	-0.00261921	-0.00452579	-0.00929777	-0.00479658	-0.0047054	-0.00767027	-0.00117684	-0.000850786	-0.00266895	0.00237106	-0.000886708	-0.00369132	0.00720107	0.0213816	0.0236032	0.0137442	0.00907449	0.00551278	0.00633343	0.0085716	0.00488554	0.00265843	0.00369185	-0.00315526	-0.00682751	-0.0104058	-0.00752935
		63.904	63.904	0.00348632	0.00300283	0.00125568	0.00167049	0.00154138	0.00153039	0.00390387	0.00334347	0.00129689	0.000527706	0.000231021	-0.00107659	-0.00327426	-0.00257375	-0.00425222	-0.0079498	-0.00433463	-0.00727402	-0.00666142	-0.00713391	-0.00963651	-0.0104469	-0.00169194	0.0062334	0.00508237	0.00331874	0.00964803	0.00828273	0.00263472	0.00363191	0.0174003	0.031578	0.0202271	0.0280398	0.02265	0.0210017	0.0225374	0.0163619	0.0166641	0.0191832	0.0174745	0.0141038	0.0172657	0.0177025	0.013428	0.0109034
		49.852	49.852	0.0251238	0.0178575	0.0167595	0.0130143	0.0155594	0.00782215	0.000782901	-0.00490014	-0.00915603	-0.00384184	-0.00191817	-0.00553852	-0.00361202	-0.00162593	-0.012365	-0.0150575	-0.0135708	-0.00824811	-0.0100583	-0.00833322	-0.00664789	-0.00359499	0.00101839	0.00556369	0.0103133	0.000686435	-0.00851481	-0.00914468	-0.00476678	0.0034556	0.00960111	0.0162006	0.0201813	0.019018	0.0233363	0.01975	0.00729158	0.00312364	0.00425571	0.00376486	0.0101913	0.00312364	-0.00259912	-0.00267288	-0.00928087	-0.0117748
		39.197	39.197	0.000900103	-0.00127106	-0.0025717	-0.00390324	-0.00321558	-0.00206432	-0.00187631	-0.00339844	-0.00152346	0.000946463	0.00203591	0.00338291	0.00489989	0.00722558	0.00572663	0.00206681	0.00147187	-0.00514722	-0.00419428	0.00166503	-0.00385431	-0.000828072	-0.0011938	-0.000619455	-0.00376674	0.000606494	-0.00344223	-0.0053069	-0.00414792	0.00218271	0.0192146	0.0203298	0.0290196	0.0199899	0.0153204	0.00976247	0.0160055	0.0096646	0.00834851	0.00458567	-0.000482952	-0.00198963	-0.000186767	-0.00162906	-0.00588125	-0.0102622
	2	70.026	70.026	-0.00620514	-0.00652221	-0.0080637	-0.0078512	-0.00660316	-5.94095e-05	0.0071286	0.0153218	0.00779309	0.00800897	0.00979332	0.00300334	-0.00336839	-0.00714285	-0.00500096	-0.00637042	-0.00353704	-0.000690173	0.00496646	0.00305056	0.00658554	0.010387	0.0031585	-0.0033549	-0.00239695	-0.00319974	-0.00571267	0.00621113	-0.0011253	-0.00434995	-0.00385411	0.00183963	0.0178583	0.0178819	0.0170252	0.0131192	0.0102015	0.00961792	0.00762444	0.0106636	0.0116047	0.0134531	0.0130719	0.00915244	0.0175109	0.0122253
		68.148	68.148	0.00161737	8.60319e-05	0.00596728	0.0035598	-0.00347766	-0.00436152	-0.00535586	-0.00685636	-0.00491907	-0.00707733	-0.0072135	-0.00636562	-0.00802542	-0.00699511	-0.000923724	0.000196514	-0.003416	-0.000599986	0.00219804	0.00225971	-0.00153266	-0.000610263	0.0121183	0.0183464	0.025461	0.00693593	0.00061275	-0.00629624	0.00130904	-0.00429986	-0.00480088	-0.00137593	0.0070053	0.00849296	0.00545341	0.00144265	-0.00177932	-0.00629881	-0.0091251	-0.00683838	-0.0086806	-0.00558967	0.000861977	-0.00200028	-0.000761855	-0.00511434
		59.928	59.928	0.00204603	0.00204603	-0.00132133	-0.00358009	-0.00185876	0.000586924	0.00615332	0.00752156	0.0019915	-0.00302189	0.00332079	-0.00160692	-0.00388645	-0.00196521	0.00120224	-0.000934489	0.000462303	-0.00362682	-0.00105651	0.00834198	0.00375177	-0.00207425	-0.00184578	0.000519421	0.00068039	0.00273923	-0.00153942	-0.00686956	-0.00514564	-0.00487562	0.00193698	0.0277491	0.0269287	0.024348	0.0234133	0.0153363	0.0130282	0.0143186	0.00585735	0.0100996	0.0107695	0.0139032	0.00944279	0.00608582	0.00260163	-0.00100199
		64.292	64.292	0.00175408	0.0119613	0.00578168	0.000828641	0.000250924	0.000250924	0.00705758	0.00788172	0.00316415	0.0121776	-0.00125497	-0.00486639	-0.00405868	-0.00215304	-0.00204352	-0.00276087	-0.00718273	2.09324e-05	-0.000113229	-0.00922528	-0.00786997	-0.0031305	-0.00133438	-0.00707869	-0.00198054	0.00513825	0.0113015	0.00163909	-0.00260754	-0.00891315	-0.0116922	-0.00145211	0.020419	0.0160273	0.00883728	0.00997355	0.00169659	0.000834117	0.00288488	0.00197586	-6.66834e-05	-0.00286491	-0.00274171	-0.00567136	0.0082048	0.019781
		47.019	47.019	-0.000775693	-0.000106946	0.00105755	-0.000186989	-0.00516515	0.0011944	0.00247509	0.000189988	-0.00134116	-0.00173363	0.00615448	0.000386222	-0.00210802	0.000288105	0.00217557	0.0027178	0.000974926	-0.00303755	-0.0045248	-0.00377085	0.000386222	0.00134674	0.0016256	0.00189929	0.00447874	0.00203098	0.0017108	0.000386222	-0.00299882	-0.00241012	-0.00331899	0.00522753	0.00998364	0.0135752	0.0172985	0.0150496	0.0113315	0.016653	0.0118634	0.00756427	0.00494867	0.00486863	0.00703237	0.00875201	0.00425411	-0.00268123
	3	35.283	35.283	-0.00435376	-0.00174306	-0.00458814	-0.00282845	-0.00301596	-0.000744218	3.10576e-05	-0.00733586	4.90872e-05	0.00175469	-0.00115169	0.00386056	0.00228837	-0.00654256	-0.00397153	-0.00806426	-0.00599085	-0.00290057	0.0102827	0.0117612	0.00238213	0.00374877	0.0135858	0.00390383	-0.00204235	0.00542193	0.00126068	-0.00163488	-0.00211447	0.00149146	0.00222347	0.0258892	0.0260298	0.0119883	0.00406249	-0.00237049	-0.00556175	-0.000668494	0.000384439	-0.00353521	-0.00141853	-0.000708159	-0.00019251	-0.00114448	-0.00312774	-0.000127604
		35.638	35.638	-0.00210169	-0.0020242	-0.000604784	0.00959531	0.00793638	0.0024172	-0.00226723	-0.00111549	-0.00172834	-0.00456014	-0.0046024	-0.00110845	-0.00212282	0.0014451	0.00179379	0.000962564	-0.00521173	-0.00152054	-0.000506164	-0.00160859	0.00230097	0.000835768	-0.00448265	-0.00274272	0.000835768	-0.00462706	-0.00261592	0.000775891	0.00250878	0.00308993	0.0110535	0.0237895	0.0313128	0.0176328	0.0151603	0.0130963	0.00872182	0.00497427	0.00528422	0.00469602	0.00481578	0.00480873	0.00713334	0.00550259	0.00630564	0.00201216
		40.358	40.358	-0.000173007	0.00410064	-0.000437466	0.00393491	0.000264231	0.00178399	0.00334253	-0.00186907	-0.000497409	0.00503506	0.0025562	0.00621278	0.00345889	-0.00183381	-0.00124847	0.00100119	0.0013538	0.000641525	0.000694417	0.00143843	0.000250127	-0.00705598	-0.00429151	-0.00361802	-0.00736275	-0.00388248	-0.00754964	-0.00158345	0.0023129	0.00322264	0.00880448	0.0269534	0.0318265	0.010966	-0.000603193	-0.00436908	0.00114223	0.00235169	0.00106113	0.000690891	-0.00154819	-0.00118853	0.00149484	-8.13281e-05	-0.00257076	-0.00286696
		35.808	35.808	0.000142386	0.00176192	0.00150887	-0.000143202	-0.000475784	0.000630414	0.00169323	-0.000436019	0.00188483	0.000413513	0.00119797	-7.45162e-05	-0.00636105	-0.000779447	-0.00191457	-0.000381794	0.000525579	-0.000938508	-0.00406912	-0.00393175	-0.00629237	0.00205112	0.00338868	0.00286089	0.0019969	0.00315009	0.000550884	0.000731635	-8.17463e-05	0.00160647	-0.000215502	0.00906428	0.025303	0.0144651	0.0097909	0.00765803	0.00564808	0.00207281	0.000164076	0.00137873	-0.0027171	-0.00236283	-0.00266288	-0.00226522	-0.00447762	-0.00336058
		35.586	35.586	-0.00194984	-0.000769587	-0.00116057	0.000410667	0.00107936	0.000735876	-0.000594194	0.00317677	-4.6088e-05	0.000432591	-0.000502843	-0.000605156	0.0001695	0.00176997	-0.00135423	0.000827227	0.00253732	0.00032297	0.00471512	0.00230711	0.000834535	0.00119628	-0.00382071	-0.0026843	0.00178824	0.000180462	-0.00345896	-0.00276835	-0.00167213	-0.00118615	8.91113e-05	0.0121182	0.0285139	0.023453	0.0145993	0.00524861	0.00428029	0.00240577	0.00266886	0.00218653	-0.000433416	-0.00211062	-0.00270623	-0.00428842	-0.00462094	-0.00366358
	4	37.873	37.873	0.00140558	9.15255e-05	-0.0106623	-0.00633126	-0.00992748	-0.00950377	-0.00163284	-0.00529342	-0.0167069	-0.0172379	-0.0166372	-0.0206893	-0.00956008	-0.00499307	-0.00311316	-0.000533322	0.00223692	0.00317822	0.0135834	0.0166218	0.0135593	0.0218298	0.0197326	0.0225807	0.0154043	0.00477654	0.00121786	0.00253996	-0.0027109	-0.004269	0.00104355	0.0054282	0.00676371	0.0204916	0.0355147	0.0562983	0.0405189	0.0415621	0.0439649	0.0414816	0.030886	0.0359036	0.0350937	0.025906	0.0195798	0.020277
		42.225	42.225	-0.00272971	-0.00665492	0.00655133	0.00344755	0.01758	0.0347114	0.023465	0.0238372	0.0186908	0.0126294	0.00429654	-0.00317074	-0.00831708	-0.0154288	-0.0182459	-0.0160903	-0.0107841	-0.0146487	-0.0150043	-0.020305	-0.0181715	0.00644659	0.0194461	0.0123399	0.0031526	-0.00121916	-0.00801386	-0.0160517	-0.014034	-0.00297779	0.00525303	0.0111905	0.0196694	0.0328922	0.0411892	0.056154	0.0562863	0.0400011	0.0314588	0.0259183	0.0251327	0.0300861	0.0452853	0.0549081	0.0510546	0.078487
		33.883	33.883	-0.0081797	-0.0103535	-0.007597	0.00154121	0.00416509	0.0164855	0.00846728	0.0176369	0.00443376	-0.00352859	0.00331024	-0.00547208	-0.00549301	0.00122021	-0.00217827	-0.00823902	-0.00309942	0.0079753	-0.00324597	-0.00481611	-0.00473237	-0.00346579	-0.0144149	-0.0246766	-0.017939	0.02002	0.0207074	0.0145524	0.00985249	0.000592151	-0.00352859	0.0198595	0.0539979	0.0660914	0.052651	0.0354667	0.0254876	0.0165448	0.00307995	-0.00262838	0.00157262	0.00667732	0.000142044	-0.00968354	-0.0146452	-0.0152418
		35.047	35.047	0.00907159	-0.00478758	-0.00364138	-0.00915165	-0.0134563	-0.0181062	-0.00851487	-0.00636114	-0.00841582	-0.0126072	-0.00890543	-0.000941431	4.91166e-05	0.00760841	0.0111178	0.00552543	0.00697729	0.00215474	0.00191135	0.00903197	0.0067622	0.0137951	0.0141007	0.00645088	-0.00421024	-0.0011452	0.00249435	0.00113589	-0.00728942	-0.00396968	0.00141041	0.0146639	0.0241336	0.0186601	0.0265731	0.0190591	0.00297265	-0.0054838	-0.0128478	-0.0167874	-0.0214627	-0.0279268	-0.0222071	-0.0170421	-0.0192241	-0.00486117
		34.868	34.868	0.0164584	0.0138681	0.0065875	0.00441846	0.00011658	-0.0135856	-0.0126574	-0.00508385	0.00551121	-0.000367258	-0.00455393	-0.00657486	-0.00306951	-0.00314192	-0.0087077	-0.00914216	0.00357915	0.00529397	-0.00737468	0.00164709	-0.00851021	-0.0124994	-0.00824361	-0.00816461	-0.0107089	0.000254819	0.00123895	0.00405311	0.0126042	0.0121302	0.00641634	0.018328	0.0368685	0.0341235	0.0353972	0.0186867	0.000136328	-0.00994198	-0.00802638	-0.00339207	-0.00151925	-0.0120649	-0.0120847	-0.0187004	-0.0172687	-0.021643
		37.28	37.28	-0.00963359	-0.0234382	-0.0175612	-0.00116465	-0.000488733	-0.000657711	-0.00840778	-0.00480483	-0.00111596	0.0162	0.0124538	0.00976737	0.00559734	-0.0028802	0.0108299	0.011712	0.00321446	-0.00389693	-0.00393703	-0.0110542	0.00247268	-0.0060335	-0.0079209	-0.000457229	-0.00304345	0.00358106	-0.0019723	-0.00761445	0.0107469	0.0123335	0.0171738	0.0137426	0.0198087	0.0234947	0.00839836	0.00753915	-0.000534558	0.0202612	0.00394765	-0.016049	-0.019672	-0.0204453	-0.0277515	-0.0327893	-0.0338118	-0.0333621
		41.252	41.252	0.00121586	0.00479058	-0.00339634	0.00284618	-0.000439171	-0.00708399	0.0030685	0.0200423	0.0256602	0.0145408	0.00879582	-0.000170978	-0.00477259	0.00994269	-0.00152606	-0.00860845	-0.00599005	-0.00816734	0.00206984	-0.00196363	0.00714785	-0.00128256	-0.0046385	-0.00990354	0.00237685	-0.0036963	-0.0122467	-0.0139088	-0.00297641	-0.000721478	-0.0110045	0.000418339	0.0144631	0.0147631	0.00633268	0.00105706	0.0094169	0.006922	0.00329435	-0.00504079	-0.00483258	-0.00763802	-0.0156732	-0.0175858	-0.0236378	-0.0225297
		33.799	33.799	0.00937546	0.0109418	0.0146109	0.00233535	-0.00696349	-0.0113533	-0.00833973	-0.00530633	0.00764736	0.0139468	0.0070543	-0.00059306	0.00392441	-0.00109532	-0.00299084	-0.0061264	-0.0165262	-0.0122244	0.00188701	0.00821772	-0.00196646	0.00237224	0.0057263	-0.00474165	-0.00401238	-0.00746291	0.00189836	-0.00151812	-0.0032519	0.00260493	0.0104963	0.0163872	0.0223263	0.0206408	0.00910589	0.00417412	-0.00494595	-0.0174172	-0.0212877	-0.0260436	-0.0278256	-0.0299084	-0.0356205	-0.0275759	-0.0266679	-0.0253257
		35.904	35.904	-0.021278	-0.0136391	-0.00174036	0.00459246	-0.00182743	-0.00464723	-0.00804305	0.016297	0.0157042	0.0100981	0.000911989	-0.00594327	-0.0104643	-0.0113283	0.0249205	0.0186245	0.00754622	-7.25961e-05	0.00565742	0.0130519	-0.00750722	0.00445515	-0.00331436	-0.00622123	0.000299135	0.00314237	-0.000789267	-0.00763782	-0.00387363	-0.0105815	-0.00639202	0.00816912	0.015942	0.0193311	0.0164242	0.0100378	0.00506131	-0.00507589	-0.0144161	-0.0142654	-0.0152231	-0.0207455	-0.0206049	-0.0226477	-0.0299249	-0.0312679
		36.676	36.676	0.0141919	0.0160652	0.0199696	0.017477	0.00161942	-0.00294081	-0.00623194	-0.00405505	0.00268812	0.00922788	0.0186276	0.0145866	0.0115171	0.0143862	0.0198087	0.00725745	0.00937362	-0.00123452	-0.00964451	-0.0297313	-0.0302445	-0.0231582	-0.0159657	-0.0134821	-0.00360875	-0.0083481	0.00624036	-0.00652037	-0.017423	-0.0222443	-0.0156104	-0.0106495	-0.00752228	-0.0017962	-0.0170192	-0.0190746	-0.005901	-0.00646268	-0.0151672	-0.0208538	-0.024154	-0.0250315	-0.0252895	-0.0270444	-0.0302839	-0.0262793
	5	47.462	47.462	0.0314775	0.00166991	-0.00830513	-0.00443155	0.00685335	0.0141163	0.00908122	0.0415337	0.0152722	0.00063994	0.00678898	0.000320873	0.000959007	-0.00672659	0.00761463	0.00882373	0.00526081	0.0113511	-0.00747668	-0.0183529	-0.0176476	-0.0200015	-0.0142191	-0.00458828	0.00214571	-0.0184621	-0.0116917	-0.0267103	-0.0171914	0.00727597	0.00461988	-0.00924554	-0.0149328	-0.00906362	-0.00194338	-0.00202455	-0.00980251	-0.0182018	-0.0221426	-0.0281797	-0.0205836	-0.019117	-0.0271133	-0.0148124	-0.023875	-0.0286219
		39.219	39.219	0.0120261	0.0170633	0.00900194	0.00940096	0.00781989	0.00441174	0.000769582	0.00427073	0.0133431	0.00879193	0.00917295	0.011321	0.0121401	0.010394	0.00671284	-0.00473566	-0.0143601	-0.00837482	-0.00228155	-0.00921785	-0.0206153	-0.0164362	-0.0166162	-0.0150861	-0.0244495	-0.012683	0.0056838	0.00444774	-0.00160652	-0.00152252	-0.00849782	-0.00182253	0.0268437	0.0449285	0.0630133	0.0583931	0.0583601	0.0595811	0.0653084	0.0678675	0.103899	0.0872844	0.0744108	0.078206	0.0470016	0.0375062
		36.514	36.514	0.0236989	0.0204298	0.0301801	0.0203255	0.00693278	0.000303675	-0.00603282	-0.00160333	-0.00436462	-0.0175589	-0.0267913	-0.0317219	-0.0246085	-0.0201151	-0.0130454	-0.00849478	-0.00781202	-0.0113233	-0.0150331	-0.0138795	-0.00215155	0.00670072	0.0153243	0.022774	0.00809649	0.00179026	0.00375781	0.00789469	0.00305487	0.00302124	0.00209969	0.0106728	0.0203524	0.0211327	0.0232281	0.0143254	0.0401254	0.0325041	0.0253436	0.0213816	0.0178367	0.00775344	0.00278917	-0.0145858	-0.0151575	-0.00812481
		38.915	38.915	-0.0264873	-0.0272706	-0.0245601	-0.0288738	-0.033768	-0.0295022	-0.0372731	-0.0321395	0.00251431	0.00746484	0.0116265	0.0147427	0.0189776	0.00738313	-0.00931965	-0.0174372	-0.0176091	-0.0217171	-0.00171774	0.0116265	0.00949916	0.0156613	0.0330544	0.0192706	0.0156838	0.0161994	0.0420172	0.043843	0.0271543	0.0236943	0.019589	0.0364778	0.04253	0.0499459	0.045387	0.0248664	0.0157824	0.0208203	0.0114997	0.0164868	0.00625045	0.00491491	0.0111221	0.0019846	-0.00145852	-0.00556378
		33.757	33.757	-0.0138306	-0.0129797	-0.0147976	-0.00143328	-0.000774065	-0.00751723	-0.0113244	0.000596638	0.0206664	0.0180644	0.0111354	-0.00322507	0.000669239	-0.0121114	-0.0146728	-0.0038988	0.0162813	0.014504	0.0106998	0.00147946	-0.00772051	0.00348034	0.0157557	0.00837363	0.00694195	-0.00293757	-0.0108336	0.0297386	-0.00301017	-0.0144927	-0.00740978	0.000892849	0.0159357	0.0260476	0.0383287	0.0254697	0.0179511	0.00659927	0.00128199	-0.00148555	-0.00131131	-0.00479324	-0.00558605	0.00959042	0.0131246	-0.00435474
		33.742	33.742	-0.0204261	-0.0121414	-0.0125517	0.0126914	0.0320565	0.0176129	0.00437575	0.00413816	0.0102754	0.000963099	0.0045578	0.00814941	0.0146507	0.0127747	0.00424307	0.00232693	-0.00209162	-0.00955256	-0.0045354	0.00609133	-0.00856209	-0.00661508	-0.003403	-0.00897555	-0.0172511	-0.0153226	-0.00874105	0.00262006	0.00599568	0.00482933	0.0127994	0.0244814	0.0513136	0.0590954	0.0624186	0.0465988	0.0361325	0.0288629	0.0134998	0.0079396	0.00507001	0.0145273	0.0101581	0.00287307	-0.00576655	0.00279285
		38.028	38.028	0.0140983	0.00692837	0.0122502	0.00389988	0.00730327	0.00244715	-0.00301819	-0.00464373	0.0185503	0.0116234	0.00691958	0.0121008	0.00117307	0.000710306	-0.00150687	0.00131659	0.000373482	-0.000370459	0.00161827	-0.011058	0.000259255	-0.0074379	-0.00850402	-0.0117785	-0.00773665	-0.00226253	0.00127558	-0.0103639	-0.00987475	-0.0168367	-0.00745547	0.0134217	0.0353153	0.0318768	0.038499	0.0408099	0.0573172	0.0621587	0.0545611	0.0413459	0.0310508	0.0216344	0.0215055	0.020539	0.029393	0.0269123
		34.005	34.005	-0.00663645	-0.00769987	-0.0136471	-0.0228005	-0.0236539	-0.0193922	-0.0206896	-0.0125863	-0.0088723	0.00974027	0.0373468	0.0288181	0.0165568	-7.24672e-05	-0.000723814	0.00979345	0.00138974	-0.00702726	-0.00997294	-0.0108662	-0.00611803	-7.51257e-05	0.00236543	-0.00361101	0.01661	0.0128348	0.0104155	0.0106894	0.00861305	0.0153578	0.012896	0.0210524	0.042414	0.0406434	0.0342921	0.0293498	0.0140525	0.0115773	0.00661913	0.000137559	-0.00345947	-0.00545871	0.00163167	0.00275092	0.0110057	0.026896
		45.565	45.565	-0.0111612	-0.0138537	-0.0163689	-0.0116259	-0.00681907	-0.00929167	0.00642725	0.0470992	0.020007	0.00867636	-0.000972813	0.00647691	0.00628535	-0.00879503	-0.00943712	-0.0125128	-0.01081	-0.00600315	-0.0014127	0.00160976	-0.00768466	-0.0106681	-0.00271818	-0.00916751	-0.00249114	0.000173026	-0.00135239	-0.00704611	0.0147142	0.0290602	0.0196629	0.0287977	0.0401745	0.0414445	0.0428671	0.047383	0.0476597	0.0303799	0.0210358	0.0171868	0.0246826	0.0188435	0.018134	0.0244308	0.0233736	0.0343886
		35.559	35.559	-0.00349146	-0.0031486	0.0189171	0.00679792	-0.00691283	-0.0104894	-0.00432515	0.0125435	0.0227499	-0.000914601	0.00237324	-0.00576155	-0.00101565	-0.00546921	-0.00623794	-0.0125249	-0.0186819	-0.0182885	0.00736093	0.00572243	-0.00597087	-0.00147761	-0.00191431	-0.0055847	-0.00951495	-0.0019504	0.0105333	-0.000304673	0.0206927	0.0291126	0.00885869	0.00906801	0.0245364	0.0511531	0.0534737	0.0490021	0.0426538	0.0404595	0.027106	0.0129694	0.0175023	0.00476242	0.010093	0.0235114	0.0181772	0.0190073
	6	62.637	62.637	0.0211945	0.0233544	0.0314513	0.0301845	0.02909	0.00251388	-0.0087266	-0.0154399	-0.0202327	-0.0332683	-0.0275765	-0.00722339	-0.0157815	-0.0114265	-0.0178801	-0.00627185	-0.0108398	-0.0109712	-0.0245263	-0.00244524	0.0162325	0.0112879	0.000753816	0.00158861	0.010637	-0.00278383	0.00662654	0.00549986	0.00998613	0.0124555	0.00253723	-0.00649076	-0.00421698	0.00613617	0.0200357	0.0130947	0.0241075	0.028836	0.0605902	0.0453976	0.0263229	0.00882443	-0.00676513	-0.0164207	-0.0228275	-0.0211142
		52.35	52.35	0.00965979	0.0084645	0.00177738	0.00297805	0.00242886	-0.0103047	-0.00427711	0.0121177	0.00350839	-0.00470245	-0.00785488	-0.00562315	0.0100367	0.0119023	0.0122065	-0.000938928	-0.00714955	-0.0131906	-0.0184186	-0.0153604	-0.0115026	-0.0147978	-0.00708764	0.000654783	0.00573743	0.0134529	0.0136198	0.00732576	0.00997207	0.00228349	-0.00691804	0.000738238	-0.00238188	0.00229695	0.00499441	0.0230556	0.0479708	0.0566769	0.0876978	0.051099	0.0321521	0.0268353	0.0201212	0.0140156	0.00627046	0.00427025
		70.536	70.536	-0.0225346	-0.0202794	-0.00412365	-0.0128307	-0.0164463	-0.00946851	-0.00401351	0.02851	0.00294775	0.0159533	0.0113987	0.0059933	0.0271442	0.0184398	0.0320154	0.01608	-0.00231725	-0.004388	-0.023157	-0.0282705	-0.0124259	0.0137504	-0.00340219	-0.00164536	-0.0100358	-0.00155999	0.000995404	-0.00562164	-0.000373166	0.034356	0.0183187	-0.00587223	-0.00546744	0.0103523	0.0236718	0.0187703	0.0308203	0.0198828	0.0050543	-0.0162921	-0.0211606	-0.0268661	-0.0322193	-0.0278575	-0.0208879	-0.0161461
		44.241	44.241	0.0506775	0.0462097	0.0171512	0.00346359	-0.00573314	-0.0183195	-0.0101017	-0.00518418	-0.00119596	-0.0136931	0.0295623	0.0217446	0.0510478	0.0246911	0.0154911	0.00208788	-0.0030148	-0.00654336	-0.00300819	-0.0123405	-0.0223078	-0.0232999	-0.0158724	-0.0286406	-0.0204096	-0.0169339	-0.00124887	-0.00115958	-0.0157963	-0.0159848	-0.0213388	-0.0368354	-0.0185676	0.0254088	0.074372	0.0380514	0.0159772	-2.85894e-05	-0.013326	-0.0171158	-0.0281777	-0.0240439	-0.0152639	-0.0107498	-0.00658635	-0.016795
		51.741	51.741	0.00621376	0.00423007	0.00175046	0.0077472	0.0177537	0.010465	0.00363627	-0.00485966	-0.00235395	-0.0131729	0.00427901	0.0271404	0.0131045	0.015682	-0.00310435	0.000422565	0.0125205	0.0227913	0.00359712	-0.0203801	-0.021075	-0.0107618	-0.00232458	-0.0215285	-0.0225758	-0.0114894	-0.00571121	-0.0045236	-0.0116916	-0.0159135	-0.0180375	0.0277962	0.0279658	0.0409185	0.0517864	0.0609479	0.0619691	0.0570849	0.0739495	0.0465792	0.0313688	0.0539626	0.051297	0.0364487	0.0217603	0.00236384
		50.121	50.121	-0.029242	-0.0202518	0.0156375	0.0190544	0.00933535	-0.00180238	-0.00340031	-0.00182926	0.00281519	0.0087589	0.000709507	-0.0050311	-0.00128865	-0.00270439	-0.0140841	-0.00793127	0.0298128	0.023666	0.0224832	0.0200639	0.0113723	0.0108735	-0.000739086	-0.00267452	-0.0138152	-0.0136928	-0.0165272	-0.0196514	-0.0184507	-0.00294632	0.0014801	0.00507918	0.0481128	0.0643848	0.0596597	0.0574884	0.0344811	0.0128837	-0.00561651	0.0113962	0.021859	0.0145174	-0.000476248	-0.0100907	-0.00486384	-0.0242541
		53.576	53.576	0.0506417	0.0485952	0.0401076	0.0303593	0.033927	0.0420399	0.0470374	0.0202958	0.00224721	0.000246383	-0.00368675	-0.00710369	0.00204621	-0.00251275	0.0110454	0.0216525	0.00325676	0.0243294	0.00350801	-0.00986739	-0.021717	-0.0175509	-0.0126402	-0.0215298	-0.0366456	-0.0347544	-0.0405879	-0.0505692	-0.0433059	-0.0351701	-0.0436942	0.000776282	0.0150151	0.0253801	0.0449452	0.0348497	-0.0115256	-0.0351701	-0.0384683	-0.0363441	-0.0247091	-0.0323105	-0.0431597	-0.0721534	-0.0881555	-0.0917506
		44.764	44.764	0.0187494	0.012667	-0.00461693	-0.011777	-0.0191033	-0.0228051	-0.0342207	-0.0277692	-0.0252263	-0.031711	-0.0221223	-0.0261453	-0.0324602	-0.0102638	0.00208553	0.0368601	0.0157636	0.00749253	0.0178784	-0.0160104	-0.014427	-0.00536247	0.00412653	0.0192034	0.0195909	0.0424775	0.0367567	0.0358857	0.0361035	0.0150771	-0.0166969	0.000893407	0.0268507	0.0471795	0.0655375	0.0451976	0.0310397	0.0302942	0.00711607	-0.00769873	-0.00657674	-0.00623349	0.0122057	-0.00113652	-0.016313	-0.0184131
	7	40.85	40.85	0.00674065	0.00403781	0.00092624	0.00235018	0.00498183	0.00480515	0.00375829	0.000506969	0.00248202	0.000462142	0.00170677	0.00299886	0.00382949	0.00190717	-0.00320318	-0.00641495	-0.000721836	0.00379257	0.00150373	-1.5141e-05	-0.00263888	-0.00591921	-0.00487499	-0.00426586	-0.00350643	-0.00314517	-0.00415511	-0.00379121	-0.00196119	-0.00323482	-0.00392833	-0.00166849	0.000346117	0.0195376	0.0219583	0.0105668	0.00361326	0.00811976	0.0123942	0.0122782	0.0126895	0.0120145	0.00874208	-0.000402769	-0.00206667	-0.00474842
		45.365	45.365	-0.00240592	0.00699815	0.00647236	0.00378313	0.00574117	0.00339152	0.00571926	0.00874533	0.00324364	0.0022523	0.00198392	-0.0015652	-0.00180892	-0.00259762	-0.00391485	-0.0028523	-0.00471449	-0.00335071	-0.00289612	-0.00336988	-0.0033781	-0.00362456	-0.00277288	-0.00259488	-0.000384894	-0.000168551	-0.000587545	-0.000751856	0.000644789	0.000800884	-0.0060372	-0.00553057	-0.0012311	0.00220848	0.00433905	0.0103364	0.0130749	0.0158627	0.0166295	0.0138718	0.00592465	0.0029561	0.00211537	0.00126917	0.00374205	-0.00123931
		36.423	36.423	0.0017571	0.000526229	0.000574604	-0.000562207	-0.000796019	6.39798e-05	-0.00245958	0.00224085	0.000808416	-0.00150821	-0.00127708	0.00125454	-0.00132546	-0.00388126	-0.00247839	-0.000169832	0.00346098	-6.50201e-05	-0.00296752	0.000184917	-0.00100564	-0.00134427	0.0013701	7.20422e-05	0.00234835	-0.000102645	-0.00105402	0.000389167	0.00196135	0.00294498	0.000518167	0.000158042	0.00527772	0.0114348	0.0107844	0.00660803	0.0104968	0.0103141	0.0025096	0.00211185	-0.00148133	-0.00363939	-0.00470633	-0.00215052	0.00127873	0.00327823
		45.663	45.663	-0.00403887	-0.00272964	-0.00324978	-0.0016391	-0.00275623	-0.00123421	0.00158228	0.00212311	5.72964e-05	0.00157637	0.000940958	0.00334369	0.00415347	0.00197534	-0.00144109	-0.00033577	0.00452584	0.00162661	0.00577893	0.00911852	0.000308504	-0.000755436	0.00338802	-0.000888428	-0.00363398	-0.00172185	-0.00290696	-0.00439943	-0.00137016	-0.00454129	-0.00229815	-0.00116623	0.000479917	0.00333482	0.0103007	0.00610698	0.00546566	0.0131733	0.00381655	0.00864566	0.00551294	0.0045288	0.00494847	0.00157932	-0.000823409	-0.00247252
		49.826	49.826	0.00529988	0.00166147	0.000366629	0.000774937	-0.00128059	-0.00172525	-0.000321342	-0.00289704	-0.00123025	-0.000528292	0.00201384	0.00499785	0.00198867	0.00281648	-0.0001899	-0.00272924	-0.00329975	-0.00377518	-0.00422823	-0.00370526	-0.00440442	-0.00457222	-0.00126101	-0.00348153	-0.0048351	-0.00130016	0.00331707	0.00563828	0.00543133	0.0065332	0.00924313	0.0142603	0.0193222	0.0177924	0.0139359	0.0168332	0.0161816	0.0155355	0.0128396	0.010524	0.0104289	0.00722397	0.00522158	0.00219003	0.00355199	0.00150486
	8	47.078	47.078	0.00532347	0.00355035	0.00618737	0.0027431	-0.00269239	-0.00241481	0.00113993	-0.00061903	-0.0029898	-0.00320223	-0.0101814	-0.00496119	-0.0011572	0.00207181	0.00227008	0.00273744	0.00280258	0.00218227	6.07609e-05	-0.000330119	-0.000633192	-0.000936265	0.00112293	0.000440311	0.00010608	-0.00398966	-0.00263857	-0.00257626	-0.00305495	-0.000480239	-0.00206358	0.00147699	0.0125378	0.0176872	0.0139398	0.0139342	0.0127983	0.0139115	0.0134668	0.0134668	0.00864312	0.00614772	0.00163278	0.00469183	0.00408569	0.00122773
		41.297	41.297	0.000970243	0.00124933	-0.00179504	-7.84652e-06	0.00334633	0.00599895	0.00839297	0.0065981	0.000312209	0.00155914	0.00269086	0.00271903	0.00031989	-0.00270399	-0.00117541	-0.00133416	0.0032388	0.00362798	0.000872946	0.00285985	-0.00287042	-0.00729231	-0.00552048	-0.00621948	-0.00613755	-0.00443741	-0.00542062	0.00300836	-0.000356067	-0.0025222	-0.000671001	0.00020467	-0.00014611	-0.0012599	-0.000750375	-0.000847672	-0.0038946	-0.00159532	-0.00381779	-0.00108067	0.00124677	-0.00474979	-0.00139305	-0.00423258	-0.00455775	-0.00294467
		37.911	37.911	-0.00020711	0.00400381	0.00477139	0.00188281	0.00127783	-0.00125685	0.00161738	0.000768505	0.00421902	0.00405164	0.00170108	0.00210519	0.00200476	-0.00233768	-0.000219066	-0.000635137	-0.00016885	-0.00188335	-0.00193117	-7.79844e-05	-0.0020316	-0.00180205	-0.000871867	-0.000436666	-0.00162032	-0.000714047	-0.00360024	-0.00389675	-0.00298809	-0.00233768	0.000613076	0.000715898	0.00484074	0.01387	0.0157829	0.0117059	0.00972359	0.00765041	0.00665328	0.00551028	0.00381252	0.00139978	0.00130175	0.00168434	-0.00022624	0.0013137
		41.448	41.448	-0.00240513	-0.00276104	-0.00218829	-0.00104514	0.000878173	0.00542247	0.00224523	-0.000894292	-0.00156839	0.00197418	-0.000807083	0.00040913	0.00437125	0.00405306	0.00133779	0.000899386	-0.00144819	-0.000191906	-0.0015354	-0.00136569	0.00105731	0.00262471	-0.00105928	-0.000578454	-5.04855e-05	0.000710826	-0.000198977	0.00055055	-0.00212465	-0.00322537	-0.0030863	-0.00102157	0.0100988	0.0141292	0.0137615	0.011513	0.00795154	0.00360522	0.00229709	-0.000368681	0.00283449	0.00105259	0.00562046	0.00151456	-0.001064	-0.0012997
		38.29	38.29	0.00100407	-0.000208101	-0.00017558	-0.000896972	-0.000279058	-3.95793e-05	-0.00255263	-0.000418015	-0.000811233	-0.000527406	-0.00126654	-0.00134932	-0.000698885	-0.000548102	-0.00154741	-0.00269454	-0.00199089	-0.00173367	-0.000423928	0.00356443	0.00438043	0.00404338	0.00414982	0.0047086	0.000924248	0.00206547	-0.000734363	-0.0022895	-0.00335089	-0.00183715	0.00153329	0.000300421	0.00631991	0.0123571	0.0115175	0.00712113	0.00587939	0.0066333	0.00422669	0.00127903	-6.32315e-05	-0.00248463	-0.00321489	-0.00477298	-0.00553576	-0.00552985
	9	42.991	42.991	-0.00110457	0.000944541	0.0010477	-0.000286335	-0.000574711	-0.00065677	0.00123995	0.00259274	0.00271231	0.00290691	0.00362199	0.00180967	0.00178857	0.000686644	0.000365444	-0.00146329	-0.000424662	0.00276155	0.000414679	0.000250562	-7.76719e-05	-0.00151721	0.000492048	-0.00118663	-0.00313493	-0.00337408	-0.00356633	-0.00080213	-0.000117529	-0.00209631	-0.00170946	-0.000396527	0.00266073	0.00488569	0.00411668	0.0034696	0.00281078	0.000590518	-0.000846676	0.00297256	0.00207695	0.00120478	0.00596886	0.00702859	0.00561953	0.00321404
		40.303	40.303	-0.000666415	-0.00147758	-0.000417875	-0.0014967	-0.00185176	-0.00029497	0.000125636	0.000204841	-0.000393294	-0.000445187	0.00263562	0.000955923	0.00278856	0.00122358	0.00067734	0.000387832	-3.00433e-05	0.00274213	0.00329111	0.00123724	0.000371444	-0.000483424	-0.00097231	-0.0027039	-0.00252364	-0.0030371	-0.00182172	0.00184903	-0.000609059	-0.00142842	0.000423337	0.00387832	0.00813081	0.00580928	0.00469222	0.00407769	0.00823732	0.00638283	0.00277764	0.00299614	0.00576558	0.00435355	0.000969579	0.000133829	-0.00109795	-0.00203202
		43.057	43.057	-0.00131631	-0.000449476	-0.00036057	-0.00141633	0.000430691	0.00305563	0.00157758	0.0028756	0.00349127	0.00126418	-0.000211653	0.000795205	-0.00055394	-0.00156302	0.000761865	0.000419578	0.000548491	0.000575163	-0.000116079	-0.000658405	-5.6068e-05	-0.000833993	-0.000809544	-0.000987356	-0.0011585	-0.00229427	-0.000491706	-0.00168082	-0.00094068	-0.000542827	0.000646288	0.00239773	0.00292672	0.00452258	0.00635404	0.00561834	0.00642739	0.00518493	0.00771874	0.00465371	0.00669855	0.00385134	0.00166648	0.00316677	0.00360018	0.00213101
		35.869	35.869	0.000566617	0.00108939	0.00198594	0.000961309	1.77068e-05	-0.000110372	-0.000591322	-0.000444946	-0.00100431	-0.000180946	-0.000319481	-0.000565183	-0.00157413	-7.11643e-05	9.61224e-05	2.81622e-05	-0.000640985	-0.000314253	-0.000314253	0.000733903	-3.71842e-05	-0.00114546	-0.00108534	0.000762656	0.000780953	-0.000392669	0.000509112	0.00181604	0.000948239	-0.000795202	-0.000708945	0.000890735	0.00538918	0.00719274	0.00539964	0.00480106	0.00561659	0.00525587	0.00350982	0.00229438	0.00269691	0.000961309	0.000490815	-0.000259362	-0.00182768	-0.00151663
		37.54	37.54	0.000675464	0.000675464	0.000844967	-0.00025564	0.000858899	0.000125161	0.000782274	0.000115873	0.000143737	-0.000710743	0.000248225	-0.000562138	-0.000292791	-8.14932e-05	-0.000297435	-0.00122854	-0.0014468	-0.000954548	-0.000661982	-0.00145609	-0.000822197	0.00100054	0.00247962	0.00292776	0.00110735	0.000129805	-3.04101e-05	-0.00107297	-0.000346196	-0.000717709	-0.00117746	0.00129543	0.00499895	0.00371026	0.00395871	0.00397264	0.00385654	0.00275826	0.00491768	0.00331785	-0.000206879	-2.24704e-07	-0.000587679	0.000204107	-0.000297435	-0.00223627
	10	40.888	40.888	-0.000173189	-0.000925149	0.00183128	0.00394545	0.00127588	0.000503347	-0.000500029	0.00411001	0.00338319	0.00339005	0.00225868	-0.000106907	0.00245524	-0.000141191	-0.000829154	-0.000920578	0.00284608	0.00105875	-0.00115599	-0.000977718	0.00152044	0.00168728	0.000503347	-0.000520599	5.07992e-05	-0.00243364	-0.00138455	-0.00355587	-0.00567233	-0.00482894	-0.00669399	-0.00442439	0.00225868	0.000423351	0.00154101	7.13695e-05	0.000635911	-0.00119256	0.0014633	0.00174214	0.000763904	-0.000534313	0.00028393	-0.00334559	-0.00449982	-0.00640143
		36.531	36.531	0.00223513	0.00162943	0.00150162	0.00176279	-0.000887849	-0.000629453	-0.0017575	0.000173519	-0.00118236	0.00105429	-1.54159e-05	-0.000782268	-0.000604447	0.00101539	0.000470813	-0.000184901	-0.000365501	0.00416615	0.0010404	0.0018128	0.00176835	-0.00161302	-0.000304375	0.00145438	-0.00282165	-0.00499996	-0.00500551	-0.0027383	-5.70927e-05	0.00197395	-0.00211037	-0.000426627	0.00399389	0.00607217	0.00347154	-0.00189087	-0.00338568	-0.000912855	-0.00285777	-0.00456652	-0.00333289	-0.00269662	-0.00298558	-0.00516111	-0.00449983	-0.00466654
		40.497	40.497	-0.000460201	0.0001987	-0.00097217	-0.00618828	-0.00477635	-0.00995572	-0.0021637	-0.00193871	-0.000278831	0.00465719	0.00248534	-0.000604838	-0.00585079	1.04423e-05	-0.00174127	-0.00181703	-0.00585538	-0.00208105	0.00288252	0.000880559	-0.00021914	0.000200996	0.00285956	0.0029468	0.0039891	0.00258176	0.00351387	0.00803434	0.00593596	0.00416588	-0.000439539	-0.00476946	-0.00374323	-0.000703558	0.00289859	0.00242106	0.000598173	0.00158997	-0.00645689	-0.00836013	-0.00621353	0.000494861	-0.00643852	-0.00446182	-0.00597017	-0.00632373
		35.903	35.903	0.00244506	0.00265545	0.000410387	0.00163279	0.000860464	0.000367776	0.000415713	-0.0014352	-0.00160298	-0.0019625	-0.000452483	0.000415713	0.00154224	0.00213613	0.00143571	-0.000202144	-0.000907886	-0.00274015	-0.00239128	0.000141406	-0.00180005	0.000916391	0.000847148	0.000468977	0.00204292	-0.000194154	-0.000436503	-0.00270553	-0.00218887	-0.000620263	0.000905738	0.00362484	0.00416014	0.0065064	0.00781935	0.0092548	0.00923616	0.0106503	0.00727073	0.00764624	0.00620813	0.00563288	0.00531063	0.00637324	0.00620014	0.00415215
		38.414	38.414	-0.00030406	-3.10513e-05	-0.00175853	0.000522026	0.00383343	0.00258606	0.00262137	0.00123279	0.00082563	7.95642e-05	0.000820923	0.0017082	-0.000233454	0.00121396	0.00224245	0.00138106	-0.00194682	-0.00472162	-0.00535942	-0.00355898	-0.00204566	-0.00378256	-0.00319418	0.000241957	0.00443593	0.00402642	0.00219773	-0.000560593	-0.00158908	-0.000367605	-0.000515876	-0.00234927	0.00154816	0.00320033	0.00543617	0.00727663	0.00376988	0.000839751	0.00495135	0.00632345	0.00816155	0.00624579	0.00305912	0.00324505	0.00231776	0.00235306
	11	63.591	63.591	-0.00296135	-0.00117707	-0.000327291	-0.000519839	-0.000250271	0.000763816	0.0019037	0.00145699	-0.000188656	0.000871643	0.00129782	-0.000524973	-0.00137219	-0.00156217	-0.00259679	-0.00169567	0.000543027	0.000997441	0.00188573	0.00543632	0.00478936	0.00414753	0.000563566	-0.0014261	-0.00218089	-0.00323605	-0.000974253	-0.000211762	-0.00193956	-0.00253774	0.00102568	0.00645554	0.00487151	0.00694076	0.00555185	0.00372392	0.00188573	0.00187289	-0.0013003	0.00171372	-0.000648204	0.00239406	0.0015032	-0.00126949	-0.000702118	0.000358181
		41.98	41.98	0.000477095	-3.59598e-05	-0.00127159	0.00319548	0.00226876	-0.000382473	-0.0017148	-0.000755849	0.000751083	-0.00101641	0.000157443	-0.00147574	0.00132592	0.00228756	-0.00120175	-0.00231382	-0.00163959	0.000401883	0.00561839	0.00765181	0.00430218	0.00309878	0.00234397	-0.00101909	-0.00237828	-0.00383418	-0.00390939	-0.00529007	-0.00313578	-0.00377777	-0.000266969	0.0121296	0.0171474	0.0133626	0.00626844	0.00747184	0.011716	0.00852749	0.0123714	0.00722471	0.00473465	0.00325458	0.00821053	0.00999413	0.00650482	0.00379987
		42.942	42.942	-0.000685162	-0.000948674	-0.00279099	0.00219303	-0.00186415	-0.00304314	-0.00387003	-0.00277054	-0.00281371	-0.00446747	-0.00102818	0.00226572	0.000932259	0.0013298	0.00137978	0.00333795	0.00330841	0.00199085	0.00132071	0.0019227	2.35959e-05	0.00128664	-0.00066926	-0.00122127	-0.000739681	-0.000794201	-0.00018994	0.00112989	0.00175914	0.00398083	0.00709754	0.009978	0.00952594	0.0087036	0.0106004	0.00823564	0.0100757	0.00887625	0.00779721	0.00536881	0.00500989	0.00594354	0.00823791	0.0109048	0.00837649	0.00581178
		47.212	47.212	0.00215773	0.00299459	0.00474661	0.00123988	0.000726965	0.00141805	0.00145315	0.00108061	0.00140455	-0.00046354	-0.00230464	0.000578489	0.00129117	-0.000736196	-0.0012923	-0.000317764	-0.00076859	-0.000933263	-0.00105204	0.00032743	0.00155303	0.00279213	0.00165561	-5.05079e-05	-0.00209947	-0.00329538	-0.0037462	-0.00164055	-0.00371381	-0.00111683	-0.00153526	0.00330774	0.0140142	0.0128183	0.0106397	0.00916578	0.00705473	0.00604779	0.0053783	0.00525952	0.00392054	0.00273814	0.00319166	0.00330504	0.00216313	0.000616283
		43.166	43.166	1.5102e-07	-0.00158223	-0.000662294	-0.000994687	-0.000449282	-0.00050312	-0.00279944	-0.0012592	-0.00121238	7.03749e-05	8.91012e-05	-0.000404807	0.000971581	0.00123609	-0.000753585	0.000613439	-0.00143007	-0.00508172	-0.000372035	0.000983285	0.00253055	0.00129227	1.65366e-05	-0.00206677	-0.00255366	-0.000442259	5.63301e-05	0.00121971	0.00418783	0.00650288	0.0027974	0.00816718	0.0196535	0.0224484	0.0195458	0.0180009	0.0183848	0.0146325	0.0133825	0.0108966	0.00916436	0.00642095	0.0078582	0.0102458	0.015	0.0109246
	12	41.125	41.125	-0.000868231	-0.00326866	-0.00740705	-0.00617956	-0.00522095	-0.00656535	-0.00316344	-0.000751327	0.00350008	-0.00012784	-0.00192816	-0.00435586	-8.10785e-05	-0.00205675	0.00026184	-0.00123843	0.00099054	0.000226768	0.00456	-0.000209673	0.000304704	0.00161013	0.00162961	0.001653	0.00519129	0.00346111	0.00153609	0.00609924	0.00658244	0.00171534	-0.00335049	0.00613821	0.0174896	0.0132499	0.00664869	0.00399107	0.0073618	0.00987134	0.006637	-0.00140209	-0.00289456	0.000374847	0.00253757	-0.00140989	-0.00608994	-0.00205675
		40.587	40.587	-0.00382696	0.00402871	0.00718352	0.00191812	-0.00321076	-0.00278273	0.00907272	0.00929042	-0.0020706	-0.00297092	-0.0020337	0.0109841	0.0117995	0.00621309	-0.00172006	0.0117515	0.0178435	0.00167828	-0.00167209	-0.00342477	-0.00011129	-0.00263145	-0.0069707	-0.012808	-0.0122619	-0.00372364	-0.00683418	-0.00731386	-0.00370519	-0.00895953	-0.00874552	0.0114711	0.00651566	0.00160449	0.000191277	-0.000683215	-0.00745776	-0.00893001	-0.00896691	-0.00793744	-0.0082437	-0.00487856	-0.0058822	-0.00805183	-0.00573461	-0.00465348
		44.764	44.764	-0.00364054	-0.00762596	-0.00478989	-0.00529367	-0.00516306	-0.00108435	0.00152035	-0.00295765	0.0048378	0.00105389	0.0069238	0.00877098	0.00729697	0.00446837	0.00583789	-0.00175232	-0.00207697	-5.89844e-06	0.00505051	0.00658049	0.00110987	0.00230027	0.000841189	0.00130765	0.000292635	-0.00418536	-0.000789548	-0.00464809	-0.00876785	-0.00772671	0.0023152	0.00143826	0.000229196	0.00312497	0.00963299	0.00764028	0.00819257	0.00440866	0.00306899	0.00362501	0.00436015	0.00312124	0.000740435	0.000852384	0.00130392	-0.00059177
		43.065	43.065	-0.00579492	-0.0115726	-0.0131455	-0.011952	-0.0146253	-0.0115277	-0.00688491	-0.00649513	0.0106585	0.0143079	0.00913044	0.00660551	0.00930636	0.00634681	0.00570178	0.00262841	0.000796801	0.00167984	0.00368736	0.00866823	0.010624	0.00437378	-0.00309407	-0.00415992	-0.00128316	-0.00156946	0.000527751	9.31326e-05	0.00120382	-0.000983066	0.0147011	0.0143355	0.0104136	0.012973	0.0217378	0.0211756	0.0183851	0.0156911	0.0167846	0.0179918	0.020465	0.0185541	0.0128075	0.0123038	0.0259219	0.0345142
		42.48	42.48	-0.00640548	0.00600095	0.00672459	0.00677478	0.0178134	0.00393042	0.0194154	0.0201767	0.0101504	-0.00206364	-0.00407143	-0.00385392	-0.00315538	-0.0042011	-0.00360294	-0.0119018	-0.00722532	-0.0111991	0.00639414	0.00147089	0.00023694	-0.0044437	-0.00408816	-0.00137347	-0.00510878	-0.0034189	0.000111454	-0.00219331	-0.00177921	-0.0064724	-0.0126422	-0.0145244	-0.014399	-0.010785	-0.0109021	-0.0141354	-0.0114626	-0.00358203	-0.000252457	0.00620173	0.000860189	0.00282196	0.000584119	0.00797527	0.0376863	0.0216366
		47.445	47.445	-0.00308777	-0.00321797	-0.00170989	-0.00560846	-0.00993738	0.0151827	0.00816671	-0.0021511	-0.00734437	-0.0110549	-0.0106788	-0.0102665	-0.00253445	0.00625721	0.0101268	0.00840901	0.00675628	-0.00274782	-0.00438609	-0.00288887	-0.000115027	0.0339269	0.0102209	0.00394266	0.00211272	-0.00484176	0.00109649	-0.00238256	-0.00816892	-0.00399912	-0.00304076	-0.00495749	0.00440557	-0.000530922	-0.00762645	-0.0108704	-0.0144507	-0.0139227	-0.00621964	-0.00393041	-0.00616178	-0.00227768	-0.00200645	-0.00369172	-0.00396658	-0.00118912
		55.399	55.399	0.00307926	0.00284542	-0.000116543	0.0015749	0.00542935	0.00542545	0.00219847	0.00611138	0.0106674	0.00544494	0.00210493	-0.00573649	-0.0081918	-0.0129972	-0.0123152	-0.00104021	-0.00412689	-0.00437242	-0.00485179	-0.005565	0.000721382	0.00344561	-0.00653154	-0.00510902	0.0017113	-0.000276333	0.00956052	0.00939293	0.00905776	0.000397904	-0.00793847	-0.00573649	-0.00968837	0.00182043	-0.00574038	-0.0071785	-0.00970396	-0.00643411	-0.00529999	-0.00769294	-0.00375664	-0.0077592	-0.00793068	-0.00997288	-0.0030902	-0.00555331
		39.524	39.524	-0.00727244	-0.00339979	0.000853408	-0.00724259	-0.00812681	-0.0114398	-0.00739556	0.0121095	0.00737125	0.000528822	-0.00219472	0.00100637	-0.00632107	-0.00700382	-0.00715678	0.00124142	-0.00493691	-0.0100482	-0.00419074	0.00553193	0.00684146	0.0117774	0.00962097	0.0114118	0.00853155	0.00257334	-0.00395569	0.00913968	0.0028345	0.00237561	-0.00306401	0.00301732	0.0118856	0.00659149	0.00390526	0.00137573	0.00677804	0.00262184	0.0153665	0.0156165	0.0170193	0.0154038	0.0117065	0.0113558	0.00984855	0.0136988
		46.158	46.158	0.00845154	0.0104807	-0.00198511	-0.00557542	-0.00680626	-0.00544958	-0.00228004	0.00420059	0.00204955	-0.00424232	0.00130633	0.0103981	-0.00225252	-0.000561575	-0.0107269	-0.00486758	-0.00270868	-0.0055125	-0.00472601	0.00555728	0.0271463	0.0177753	0.00393712	0.00495955	-0.00165872	-0.00858372	-0.00675121	-0.0133262	-0.0102629	-0.0075023	-0.00773432	-0.00321989	0.00118049	-0.00131267	-0.000545846	-0.00124582	-0.00100201	-0.00485971	-0.00300361	-0.0023351	-0.00182782	0.00241134	0.00310738	-0.00137559	0.00440508	0.00071253
SFOVglut2	1	88.845	0.0272797	0.0218841	0.0119816	0.00938314	0.000716562	-0.0161864	-0.0136098	-0.00411349	-0.00398247	-0.000661269	-0.00489084	-0.0262287	-0.0188307	0.00205727	0.0126279	0.00269051	0.00843547	0.009429	0.0082586	0.0050706	0.00783936	0.00940716	0.0102151	0.000423964	-0.00478166	-0.00708314	-0.00616823	-0.00653725	-0.00407855	-0.0151471	-0.0154003	-0.0165205	-0.030039	-0.0303753	-0.012422	0.00743758	0.029948	0.0438901	0.05431	0.055345	0.0536943	0.0497617	0.0540087	0.0486437	0.0513076	0.0551311	0.0600375
		45.319	0.00460806	0.0195039	0.0304318	0.0402208	0.0404098	0.039478	0.0288529	0.0293007	0.0349847	0.0300047	0.0183081	0.0234122	0.0170372	0.0207359	0.0164704	-0.00662528	-0.0345119	-0.0387878	-0.0276761	-0.0196006	-0.0269902	-0.0243501	-0.0210992	-0.0170744	-0.0115845	-0.016391	-0.026413	-0.0391838	-0.0462422	-0.0461076	-0.0516415	-0.045929	-0.0362901	-0.0180476	0.00378756	0.0210077	0.0184038	0.0181243	0.0169414	0.0371252	0.0192787	0.0243906	0.0194495	0.0195893	-0.0026522	-0.0212416	-0.0262241
		50.66	0.0255389	0.00276506	0.00360818	0.0128146	0.0180187	0.0196201	0.0137571	-0.00389508	-0.00121067	-0.00070674	-0.011815	-0.0189719	-0.00616035	-0.00997618	-0.0128011	-0.0165927	-0.0297192	-0.0394562	-0.030807	-0.0205321	-0.00811551	-0.0065383	-0.00416643	0.0144573	0.018416	0.0268617	0.0269441	0.0207419	0.00414603	-0.0237762	-0.034538	-0.0278464	-0.00831902	0.0205311	0.0394237	0.0391645	0.0522643	0.0652599	0.0628081	0.0617082	0.0708565	0.073725	0.0723174	0.0703768	0.0420136	0.0122598	0.00734648
		50.044	0.00716527	0.0126874	0.0177947	0.0314668	0.0234351	0.0155477	0.0140464	0.0173818	0.0158524	0.00929997	0.00616106	0.0133589	-0.0136726	-0.0180342	-0.00650685	-0.00951748	-0.00906849	0.00315844	-0.00173233	0.00371567	-0.000978672	-0.00615608	-0.00604182	-0.0118366	-0.0205157	-0.0203774	-0.0138631	-0.0126103	-0.0191707	-0.0151699	-0.00581933	-0.0178398	-0.0163365	-0.0366893	-0.0157472	-0.00128334	0.0162352	0.0214768	0.0254335	0.0319759	0.0244934	0.0356941	0.0355097	0.0553935	0.0577026	0.0294243	0.0186866
		38.212	-0.0157906	-0.0105635	-0.0065407	0.000553767	0.00763514	0.0129254	0.00326764	0.0180849	0.0227076	0.0138701	0.00345089	0.00372577	-0.00436567	-0.00798926	-0.00137256	0.0023732	-0.000268685	0.00198488	-0.00538883	-0.00627891	-0.00201394	-0.00174124	0.00287932	-0.00453802	0.000466504	0.000329065	-0.00968216	-0.00375265	0.000686843	9.34556e-05	-0.0147478	-0.0225731	-0.0173744	-0.00461437	0.0174457	0.0272496	0.0289054	0.025199	0.0211783	0.0148801	0.00470093	-0.0029302	-0.00426532	-0.0125946	-0.020734	-0.0295868	-0.0438717
		40.8	-0.0141396	-0.0211504	-0.0272579	-0.0193892	-0.00805753	0.00614243	0.00459077	-0.00319585	-0.0152778	-0.0183783	-0.000981616	0.000196287	0.0114147	0.014719	0.00134304	0.00681633	-0.00401698	0.00682765	0.0159111	0.0181282	0.0291144	0.0285962	0.028987	0.027053	0.015359	0.00371867	0.00697772	-0.00434544	-0.0273315	-0.0319101	-0.0304632	-0.0233363	-0.0111269	0.0139828	0.024853	0.0429576	0.0549206	0.0788298	0.0688091	0.0550424	0.064341	0.0652273	0.0448094	0.0274098	0.00884934	-0.00786782	-0.0342007
		43.548	0.011182	0.0188806	0.0242383	0.0183438	0.0212343	0.0059223	-0.0144455	-0.0198936	-0.0112066	-0.00555974	0.00148072	0.00408218	0.0113369	0.00634039	0.00522548	-0.00711855	-0.0138287	-0.00755213	-0.0139164	-0.021473	-0.0221647	-0.0172586	-0.00488615	0.00635846	-0.00184079	-0.00185111	0.013386	0.0141861	-0.00113622	0.00230658	-0.000372303	-0.00241631	0.00423187	0.0342674	0.045543	0.0617427	0.0583722	0.0398523	0.0422034	0.0521782	0.0445855	0.0650384	0.0642564	0.0903769	0.0413749	0.0119872	-0.00449128
		42.41	0.00460279	0.0107602	0.0169097	0.0119646	0.00594485	0.00124375	0.0101735	0.0183764	0.0161855	0.0118634	-0.00738228	-0.0116577	0.00548279	0.0158714	0.0151004	0.0144151	0.012894	0.0150511	0.0208503	0.00439253	0.0151757	0.0153548	0.00755688	-0.00812989	-0.0262983	-0.0235726	-0.0274067	-0.0414114	-0.0379044	-0.0339093	-0.0324972	-0.0413543	-0.0208781	0.00274156	0.0358803	0.0347147	0.0282355	0.0305198	0.0265715	0.0197029	0.0184309	0.0222572	0.0320566	0.0354623	0.0301876	0.0110691	0.00572939
	2	47.449	-0.00425155	-3.20072e-05	-0.00482534	0.000489998	0.00641849	-0.000168723	0.0021368	-0.0162722	-0.00338983	0.00604355	-0.00853945	-0.00653636	-0.00296932	-0.00264825	-0.00869481	-0.0125291	-0.000848158	-0.0047632	0.00961266	0.0156178	0.0150854	0.0103418	-0.00375854	-0.00167467	-0.00369019	0.0111807	0.00875922	-0.00617385	-0.00138881	-0.00298175	-0.010903	-0.0146067	-0.0082598	0.00722014	0.00811707	0.0100932	-0.0021801	-0.00800709	-0.0115803	0.0173412	0.00763443	0.0172211	0.0325622	0.0384969	0.026872	0.00547183	0.032904
		38.681	0.00970336	0.00475052	0.0108101	0.0190283	0.0192829	0.0120809	0.00983171	-0.0201021	-0.0303549	-0.0229299	-0.00971035	-0.000214949	-0.00617772	0.00544064	0.00233091	0.00207211	0.00844306	0.0161185	0.0118684	0.0162195	0.0153169	0.00442019	-0.013485	-0.0200305	-0.0129463	-0.0177771	-0.00990182	9.43412e-05	-0.000572631	-0.00877407	-0.0222797	-0.0257766	-0.0123593	-0.000953457	0.00883651	0.0111446	0.0162384	0.0071028	0.00900483	-0.00332678	-0.00795982	-0.0143076	-0.0233401	-0.0296311	-0.0388783	-0.0434061	-0.0496045
		38.962	0.0324556	0.00260507	0.00703929	0.0130834	0.00282713	-0.00253926	-0.007561	-0.00606443	0.002804	-0.00987873	-0.0205653	-0.0365881	-0.00845155	0.0180288	0.00397212	-0.0222908	-0.015067	0.0162339	0.0112514	-0.00990186	0.00145778	0.00503846	-0.0030759	0.00251024	-0.00119766	-0.0111764	-0.0229755	-0.0102627	0.0146286	0.0163241	-0.0162328	-0.024789	0.0171082	0.0235687	0.0167266	0.021473	0.0212834	0.0218917	0.0399593	0.0328003	0.0145592	0.00427051	-0.00748467	-0.0165428	-0.0318486	-0.0381726	-0.0436431
		38.94	-0.00567988	-0.00641328	-0.0127316	-0.0195566	-0.00969428	-0.00790662	0.000739782	2.08565e-05	-0.000577444	0.000184906	-0.00592354	-0.00634091	-0.0152454	-0.00395253	-0.00250744	0.0068603	0.00886026	0.0136008	0.0142643	0.000498532	0.00757681	0.00342731	-0.00468352	-0.00375953	0.00157933	0.000196969	0.0113114	0.0183679	0.011058	0.0100762	0.00524151	0.00223071	0.0144959	0.0274293	0.0275813	0.0177503	0.0288912	0.0288382	0.0492262	0.0379116	0.016076	0.00712085	-0.000702894	-0.00814063	-0.0156483	-0.0235637	-0.0282561
		37.512	-0.00525784	-0.00572174	-0.00204458	0.0121001	0.0252915	0.0155134	0.0145707	0.00587365	0.00489265	0.00823997	-0.00084227	-0.00154663	-0.00278086	0.00143042	0.00756327	0.0133429	-0.0037874	-0.00672402	0.00304556	-0.00173177	-0.00788164	-0.0174299	-0.00570897	-0.00134873	0.0092614	-0.00240421	-0.0183407	-0.0106927	-0.00473648	-0.00832426	-0.0138208	-0.0161936	-0.00974576	-0.00174879	0.00461601	0.00776968	0.0186628	0.0202248	0.0133812	0.0109489	-0.000880574	-0.014306	-0.0235755	-0.0336303	-0.0410867	-0.0466046	-0.0496178
		40.098	0.0225622	0.00492954	0.0166797	0.0299089	0.0208608	0.0140868	0.0163818	-0.000749415	-0.00676612	-0.0128751	-0.0148325	-0.0202555	-0.0120738	0.0189371	0.0143175	-0.00823883	-0.0311959	-0.0310658	-0.0350161	-0.0121094	0.00191489	-0.00296897	-0.00666543	0.0135497	-0.0013536	0.0110742	0.0017072	-0.00196199	0.000360361	0.0119406	-0.00108298	-0.0117129	0.00140301	0.00670644	0.027509	0.0266426	0.0366473	0.0426787	0.0289523	0.0414934	0.0783237	0.0787999	0.0311824	0.0060477	-0.0115849	-0.0321315	-0.0493425
		38.744	0.00507375	-0.00216867	0.00392709	-0.00223737	-0.000353917	0.00958219	0.0177344	0.0217097	0.00965327	0.00508086	-0.00549255	-0.00911731	-0.00661788	-0.0016522	0.020248	0.00737654	0.0142541	0.00693114	-0.00543332	-0.0160612	-0.0194822	-0.0132988	-0.00967406	-0.00525801	0.00336324	-0.00474627	-0.00933527	-0.00988965	-0.00253114	0.00316187	-0.00474627	-0.0054736	0.0180423	0.0161233	0.0394498	0.0219632	0.0487628	0.0355739	0.0277723	0.0493622	0.0485567	0.0316838	0.0180755	0.00106519	-0.0135973	-0.02432	-0.0338391
	3	49.357	0.00908155	0.00677075	0.0106722	0.0175178	0.0212392	0.0242807	0.0133621	-0.000299329	0.00222328	0.00592988	0.00834446	-0.000612802	4.16779e-05	9.67474e-05	0.0231455	0.00272949	-0.0105931	-0.0112772	0.00484543	-0.00388308	0.0137836	-0.00415208	-0.0274253	-0.0185612	0.00324842	-0.00323072	-0.00933073	-0.0127302	-0.0195249	-0.0220941	-0.023598	-0.0261375	-0.0353511	-0.00738423	-0.00754732	-0.00949594	-0.00969715	-0.00828652	0.000109456	-0.0311128	0.0190745	0.0330855	-0.00787774	0.0238253	-0.0543225	-0.0131602	-0.022558
		43.37	-0.0154768	-0.0182445	0.0180883	0.0127221	0.0043388	0.0282969	0.04666	0.0183856	0.00516912	0.0121685	0.00314707	-0.00162212	0.000292416	-0.000659136	-0.00550839	0.00641117	0.0176491	0.00082309	-0.00773402	-0.00749613	-0.0208224	-0.0334945	-0.040407	-0.0246904	-0.0109341	-0.00763337	-0.00997565	-0.00847284	0.0289968	0.00952659	0.000495994	0.0279469	0.00768753	-0.0163849	-0.0378772	-0.00584006	0.00301669	-0.0237228	-0.0324904	-0.0380259	-0.0247339	0.00431593	0.0437321	-0.00141397	-0.0195209	-0.0193951	-0.0138002
		44.456	0.0377403	0.0256109	0.0433768	0.00758981	0.0165587	0.0179073	0.00340346	0.00797512	0.0187794	0.0087926	-0.000751641	-0.00531809	-0.0119569	-0.00138688	-0.00867914	-0.0201682	-0.0130972	-0.0255599	-0.0213345	-0.0328886	-0.0294052	-0.00525561	0.0328432	0.0390447	0.0244159	-0.0115976	-0.0289964	-0.0200172	-0.0178719	-0.0240629	-0.00569038	0.0323486	0.00203665	-0.0102568	-0.022165	-0.00663804	0.0331817	0.0387895	0.0280034	0.0670604	0.0272198	0.0422313	0.0158584	0.0192142	0.0173423	-0.0330839	-0.0422454
		45.73	-0.0150836	-0.0359399	-0.0287209	-0.0278145	-0.018307	-0.00769521	-0.0125714	-0.0286291	-0.0341222	-0.0338067	-0.0311037	-0.03788	-0.00409517	0.0177782	0.0110443	0.0210651	0.0215995	0.022313	0.0202198	0.0138462	0.0166716	0.0232524	0.0189672	0.0400589	0.0464537	0.0301158	-0.00598584	0.0098694	-0.00392094	0.0108442	0.00157684	0.00831072	0.00836723	-0.00274368	0.02228	0.0203022	-0.0152932	0.0026811	0.0140604	-0.0124136	0.0351898	0.0302217	0.00662019	0.0389664	0.076071	0.0673076	-0.00320281
		48.356	-0.0651681	-0.00981662	-0.00990691	0.0152232	0.0170783	0.00403305	0.0196722	0.0304539	0.0325717	0.00559471	0.00205893	-0.00566315	-0.0100095	-0.0134714	-0.0128353	-0.032675	-0.0571382	-0.0385748	0.035063	0.0415805	0.0467969	0.0305216	0.0171337	0.0115951	-0.000315362	-0.0266624	-0.02704	-0.0266111	0.0185743	0.0137888	-0.00585195	-0.0474317	-0.0776921	-0.063391	-0.0568078	-0.0490139	-0.0434568	-0.0434814	-0.032634	-0.0713716	-0.105744	-0.0823196	-0.0686793	-0.032121	-0.0549199	-0.0392992	-0.039328
		47.234	-0.00429355	-0.00902039	0.00123489	-0.0181027	-0.0271537	-0.0262216	-0.0194706	-0.00959217	0.0109074	0.00862944	0.0228045	0.0356778	0.0152683	-0.00800185	-0.0134751	0.00578708	0.0207729	0.0159284	-0.00771136	-0.0120245	-0.0043009	0.026351	0.00538628	0.00999914	-0.00929985	-0.00250466	-0.0209653	0.00331794	0.0096682	0.012369	-0.0119639	-0.0230943	0.00167062	-0.00554374	-0.0327134	-0.0301616	0.00576502	0.00368749	0.0433573	0.0547727	0.0148878	-0.0376444	-0.0675241	-0.0301689	-0.0129475	-0.0401264	-0.060944
[truncated: 384 more columns]
