# Supplementary material for: Neural basis for regulation of vasopressin secretion by anticipated disturbances in osmolality
Source: eLife. 2021 Sep 29;10:e66609. doi: 10.7554/eLife.66609 (PMC8601670; doi:10.7554/eLife.66609)
Supplement: Figure 7—figure supplement 2—source data 1. [file elife-66609-fig7-figsupp2-data1.xlsx]

## Sheet: Figure 7-supplement 2e,f
Condition	Mouse#	latency to drinking/feeding onset (s)	dF/F
			time (s), water bowl/food presented at 30s
			1	2	3	4	5	6	7	8	9	10	11	12	13	14	15	16	17	18	19	20	21	22	23	24	25	26	27	28	29	30	31	32	33	34	35	36	37	38	39	40	41	42	43	44	45	46	47
water	1	80.46	-0.115228	-0.0736219	-0.0620525	-0.0723316	-0.0181155	0.0482529	0.0252192	0.0496265	0.115184	0.17311	0.14786	0.112706	0.0883726	0.059051	0.0159098	-0.00770416	-0.0225278	-0.0323318	-0.0307598	-0.0396163	-0.0423391	-0.0487347	-0.0438058	-0.0505369	-0.0585241	-0.0592881	-0.018282	-0.0377652	-0.0101233	0.00839515	0.0340757	0.0112551	0.012903	0.0555324	0.0539629	0.0529639	0.0292863	0.00685745	0.00367432	0.0782747	0.0312941	-0.0184827	-0.0532181	-0.0456226	-0.036465	-0.0530614	-0.0641068
		44.173	-0.047061	-0.0336035	0.0375542	0.132566	0.089228	0.0451649	0.0133794	-0.00514233	0.0201046	-0.00369438	-0.00102346	0.02032	0.00133873	0.0205665	0.0461653	0.00352621	-0.0176713	-0.0223286	0.00848992	0.00268856	-0.0258109	-0.0378827	-0.0458021	-0.0584388	-0.0498109	-0.0431671	-0.0230275	-0.0139281	-0.0101946	-0.00250491	0.0185466	0.0242426	0.0144325	0.10914	0.117163	0.0831418	0.0314896	0.0326216	0.0555925	0.0426615	0.0329973	0.0141285	-0.00041795	0.0514856	0.0448418	0.0919779	0.0429774
		35.735	-0.044328	-0.0614649	0.0119125	0.0571426	0.0532671	0.0612889	0.0173558	0.115639	0.0629082	0.0317775	0.00400155	-0.0192517	0.0455676	0.123793	0.146602	0.118607	0.0349079	-0.0177922	-0.054147	-0.0633601	-0.0476594	-0.0451351	-0.0316132	-0.0418887	-0.0550676	-0.0578447	-0.0794631	-0.0642033	-0.0879749	-0.113577	-0.107714	-0.0609157	-0.00876479	0.019037	-0.00242933	-0.0100231	0.0383373	-0.00766375	-0.0441268	-0.0620889	-0.0996814	-0.12991	-0.140023	-0.139014	-0.140149	-0.152054	-0.158704
		35.678	0.0214562	0.000500902	-0.00128222	0.0242341	0.0211478	-0.0116871	-0.00610507	-0.0261557	-0.0367497	-0.0287213	-0.0261004	-0.046439	-0.0470469	-0.0107534	0.0282163	0.0209035	-0.0098691	-0.0261411	-0.0473553	-0.0217662	0.0135994	0.00482634	0.00889871	0.0934993	0.0924841	0.0294526	-0.0159224	-0.0306382	-0.00485427	0.0383681	0.0546751	0.0800489	0.076948	0.0539479	0.0261452	0.0402327	0.0633987	0.0118512	-0.0186422	-0.0386782	-0.0658031	-0.081761	-0.0914765	-0.0918081	-0.0877503	-0.081825	-0.0922677
	2	40.069	0.0142811	0.0152779	0.0175047	0.00195124	-0.00494524	-0.00224544	-0.00438095	-0.00768897	0.0266448	0.0110136	0.000785499	0.011828	0.0288208	0.0147102	-0.00169805	-0.0232627	-0.029186	-0.0304734	-0.0447428	-0.0303416	-0.0231241	-0.0140009	-0.0180928	-0.0175691	-0.0126189	0.0277024	0.0375555	0.0233942	0.00402593	0.0288749	0.0794345	0.138039	0.142341	0.177536	0.22324	0.176046	0.128203	0.118624	0.0903959	0.0820261	0.0973701	0.0597182	0.0408432	0.0339771	0.0230597	0.0351936	0.0435261
		41.085	0.0112786	-0.000130114	-0.00776706	-0.015124	-0.00311214	0.0349242	0.0370423	0.0190855	0.0119918	0.0103692	0.00687501	0.0022871	-0.0163015	-0.0225455	-0.0314557	-0.0293616	-0.0315969	-0.0358785	-0.0282679	-0.035711	-0.0273465	-0.0283756	-0.0127451	-0.00794895	-0.0174646	-0.0203126	0.0287902	0.078367	0.0559468	0.0744875	0.15914	0.201276	0.193402	0.187333	0.168696	0.124976	0.100107	0.0825744	0.0736594	0.0565642	0.0510908	0.0612048	0.0295417	0.0151103	-0.000340723	-0.00927004	-0.023747
		40.679	-0.0547641	-0.0684688	-0.0585993	-0.0679214	-0.0570915	-0.0325967	-0.0538404	-0.0408636	-0.0441575	-0.0222501	-0.0129219	-0.00422071	-0.0273118	-0.0203906	-0.0055236	-0.0107994	-0.00314109	-0.00177398	-0.0153166	-0.0324896	-0.0153075	0.0385726	0.103332	0.120315	0.0751421	0.0471698	0.0278712	0.0437199	0.091523	0.102105	0.219879	0.274022	0.287528	0.36015	0.282044	0.218365	0.172296	0.137531	0.0904005	0.0919512	0.0620888	0.0565622	0.0626301	0.0439983	0.0155122	0.0254796	0.0536231
	3	35.632	-0.0451678	-0.0336511	-0.0318868	0.00452202	0.0101651	-0.00421621	0.00958714	0.008548	0.00593903	-0.00812549	-0.000704245	0.0169917	0.0221068	0.00690315	-0.00203512	0.0223847	0.0364075	0.0270108	0.0182559	0.00687259	-0.0179056	-0.0232708	-0.0254714	-0.00123493	-0.00520533	-0.00127105	-0.00883399	0.00307167	0.0113209	-0.00110712	0.00635024	0.0108458	-0.0265883	-0.0474406	-0.0479712	-0.0525557	0.00594181	0.0654312	0.0256494	0.0234099	-0.0208063	-0.0292417	-0.0399693	-0.0617913	-0.053831	-0.0149021	-0.00964252
		36.494	-0.103546	-0.0734991	-0.0327001	-0.0426708	-0.0302582	-0.0303013	-0.0193465	-0.0301506	-0.0403211	-0.0485971	-0.0550894	-0.0689874	-0.0213579	0.0423163	0.103791	0.077198	0.0901303	0.0403387	-0.015699	0.00870773	0.0738981	0.0950418	0.0682454	0.0712655	0.0298545	-0.0082134	-0.0407086	-0.0318544	0.0155537	-0.0230401	-0.0726625	-0.0360616	-0.0601547	-0.0575375	-0.0259957	-0.0111781	-0.0362492	-0.0281423	-0.0291357	-0.0542375	-0.0631779	-0.0935664	-0.116977	-0.112028	-0.101925	-0.119812	-0.126301
		34.849	0.0682665	0.0431485	0.0364447	0.0337272	0.00717915	-0.026686	-0.0586584	-0.0365328	0.00708663	-0.004452	-0.0195804	-0.0410135	-0.0701891	-0.0581985	-0.0306274	0.0215859	0.0315887	0.0156646	0.0106764	0.00333823	0.0323447	0.0503069	0.06202	0.0581579	0.00223591	-0.0278042	-0.0207197	0.00899255	-0.0522005	-0.0461021	-0.0594356	-0.00976532	-0.0312618	-0.0430436	-0.0474	-0.0459884	-0.0389516	-0.0421343	-0.0776622	-0.0892907	-0.098733	-0.10983	-0.111128	-0.115789	-0.0935545	-0.0857405	-0.0993569
food	1	35.83	0.0288604	0.00237669	0.0494087	0.122579	0.0733336	-0.00475598	-0.0499687	-0.0555588	-0.042694	-0.0450716	-0.0438963	-0.0668613	-0.0735998	0.0083267	0.00492074	0.0675477	0.00381154	-0.0358993	-0.00149449	0.0369406	-0.0157206	0.0168673	-0.0175546	-0.0396309	-0.0410976	-0.0541019	-0.0234385	0.0174794	0.0530252	0.0352413	0.00628459	0.0688674	0.0494062	-0.00278978	-0.0236932	-0.0418958	-0.0828554	-0.113896	-0.128972	-0.154398	-0.178109	-0.199512	-0.224497	-0.213432	-0.215847	-0.215702	-0.209875
		38.479	0.0359082	-1.04995e-05	0.00755712	-0.042707	-0.0595439	-0.071642	-0.058991	-0.0730325	-0.0567318	-0.0245777	0.00443865	0.0210266	0.05628	0.00765764	-0.0122403	-0.0160384	0.0015619	0.0801819	0.0741867	0.070063	0.0967794	0.0555069	0.0205791	0.0165894	0.0145168	-0.023429	-0.0416157	-0.0396364	-0.0373029	0.0063485	-0.0178574	-0.0256595	-0.027555	-0.0129439	-0.0346033	-0.0443919	-0.0433867	-0.00900692	-0.034936	-0.0726975	-0.0756006	-0.125482	-0.123074	-0.12793	-0.146038	-0.149558	-0.161355
		36.692	-0.0204465	-0.021068	-0.00777046	-0.0348683	-0.0359564	-0.00831969	-0.00755129	0.00177012	-0.0177391	0.0116975	-0.00871936	-0.0233294	-0.00609957	0.00660746	0.00449048	0.0240745	-0.0116537	-0.0142761	0.0104108	-0.0207431	-0.00684219	0.00223168	0.0208332	0.0108337	0.04092	0.026488	-0.00426881	0.0383879	0.041281	0.0459534	0.0636705	0.11183	0.0678348	0.0496381	0.0172104	-0.0244484	-0.0450819	-0.0114629	-0.0633998	-0.0894276	-0.108908	-0.134369	-0.137822	-0.114011	-0.117714	-0.126644	-0.150949
		38.576	0.0150133	-0.0132781	0.0215523	0.0567492	0.0193067	0.0177417	0.00766553	-0.0087723	-0.001826	-0.021321	-0.0181184	-0.0295414	-0.0102674	0.0309624	0.0251767	0.0283939	-0.00654413	-0.0323862	-0.0144184	-0.0220482	-0.00819926	-0.0179468	-0.023683	-0.0345591	-0.0076204	0.00983844	-0.00564821	0.0186173	0.00490796	-0.0131356	-0.011143	0.00710995	0.0243448	0.00869526	0.0168604	-0.0290673	-0.0656226	-0.050421	-0.0101976	-0.0407695	-0.0817463	-0.0998887	-0.134801	-0.15557	-0.148615	-0.156215	-0.151046
	2	35.827	-0.0101457	-0.0447498	-0.0391508	-0.0163056	0.0235088	0.00142386	-0.0128962	-0.0358766	-0.0159981	-0.00943616	-0.0292032	-0.0310312	-0.057671	-0.0310447	0.0176869	0.0314325	0.00899275	0.0225897	0.013453	0.0824077	0.121486	0.0932001	0.0511421	0.0278136	0.0200623	0.00109947	-0.0245368	-0.0306696	-0.0506765	-0.073542	-0.0572081	-0.038769	0.0525173	0.147328	0.13068	0.0702096	0.0475468	0.0294524	0.00278558	-0.00692559	-0.0347176	-0.0492236	-0.071741	-0.0622225	-0.0567283	-0.0734778	-0.0746841
		40.977	0.0165212	-0.0119923	-0.0456346	-0.020656	0.0210349	-0.0404747	-0.0647449	-0.0688398	-0.053688	-0.0671406	-0.0543318	-0.0550617	-0.00648779	0.014518	0.00734296	0.0580302	0.0485624	0.11062	0.0689962	0.0192806	-0.00996282	0.0316993	0.049345	-0.00592297	-0.0153788	0.00157038	0.0343774	-0.0148786	-0.0329383	0.0465568	0.0862254	0.126715	0.133074	0.0785166	0.0351026	-0.00873268	-0.0445122	-0.0588216	-0.0923346	-0.103624	-0.123292	-0.127542	-0.130105	-0.147564	-0.148285	-0.140329	-0.146923
		44.066	-0.0420085	-0.0578481	-0.0658305	-0.00486406	0.0934151	0.0532703	0.0219766	0.00937592	0.000197613	0.00621352	0.0497317	0.0123303	0.0109357	0.0176336	0.000946925	0.0105779	0.0289192	0.0336628	0.0246435	0.00408792	-0.0254778	-0.0135775	-0.0371426	-0.0124214	-0.0371793	-0.0419168	-0.0330994	-0.0246581	-0.00421262	0.0329655	0.0834752	0.18177	0.15433	0.114047	0.0777223	0.0318216	-0.0157673	-0.0432778	-0.0467735	-0.0464463	-0.0568816	-0.0771772	-0.0976013	-0.0986443	-0.103513	-0.115628	-0.102216
	3	33.958	-0.00142391	0.0247296	-0.00195737	0.00584452	0.0366714	0.0196479	0.0115014	0.00823676	0.00920088	0.0355462	-0.0329038	-0.0635251	-0.0451012	-0.0244045	-0.0662535	-0.0312839	-0.0192616	-0.0192032	-0.027508	0.0490244	0.0225152	0.00336058	0.028789	0.0294919	0.0344181	0.0180419	-0.0228708	-0.00888683	0.0555816	0.00608346	-0.000829323	-0.0102566	-0.0400638	-0.0424422	-0.0840689	-0.131361	-0.152133	-0.167259	-0.180442	-0.171454	-0.197852	-0.213206	-0.219066	-0.219791	-0.221694	-0.226701	-0.236603
		34.778	-0.0691277	-0.0417377	-0.025567	-0.0507919	-0.0222947	-0.0409381	-0.0337108	-0.0230421	-0.00539821	0.0196544	0.0308337	-0.0402246	-0.0352301	-0.0194684	0.00542738	-0.00330075	0.0013032	-0.00647769	0.00939778	0.00237345	0.0268048	-0.00565655	-0.0254717	0.0424066	0.0222901	0.000654277	0.054979	0.0976847	0.081308	0.106139	0.0440489	0.0284994	-0.0115091	-0.00830144	-0.0495709	0.00897645	-0.0167251	-0.0851816	-0.0881094	-0.0854245	-0.095838	-0.0681497	-0.101998	-0.145728	-0.169246	-0.198998	-0.119953
		36.583	0.0298413	0.0316706	0.089139	0.0428946	-0.0156444	0.0113002	-0.017701	0.0148345	0.0586073	0.012006	-0.0021602	-0.0738002	-0.0451558	-0.0241933	0.0316018	0.0252655	-0.0162127	-0.068085	-0.019784	0.0151491	0.00122869	0.0491199	0.121624	0.0554536	0.00193713	-0.0520367	-0.0727666	-0.0581721	-0.0117823	-0.0435301	-0.0706492	-0.074995	-0.0582964	-0.0840884	-0.0772683	-0.0915429	-0.0941177	-0.095257	-0.111572	-0.166678	-0.165427	-0.168229	-0.168049	-0.191235	-0.233041	-0.258413	-0.289259
[truncated: 224 more columns]

## Sheet: Figure 7-supplement 2d
Mouse#	latency to feeding onset (s)	dF/F
		time (s), food presented at 30s
		1	2	3	4	5	6	7	8	9	10	11	12	13	14	15	16	17	18	19	20	21	22	23	24	25	26	27	28	29	30	31	32	33	34	35	36	37	38	39	40	41	42	43	44	45	46	47	48
1	56.316	0.0562506	0.0106939	0.0421153	0.0321682	0.0346594	0.0156209	-0.0114616	0.0186369	-0.0162163	-0.0234226	-0.0105507	-0.0532459	-0.0668049	-0.0145667	0.0126366	-0.00104132	-0.0221037	0.0149258	0.0345109	0.00502433	-0.0331478	-0.0207274	-0.0277713	-0.0565371	-0.0442692	0.0351664	0.0234846	-0.00422761	0.0139475	0.00445796	0.115263	0.184144	0.214076	0.107451	0.0208568	-0.032629	-0.00634257	-0.0216403	-0.0185729	0.0155773	-0.0273891	-0.0628186	-0.0664366	-0.0817086	-0.103658	-0.103739	-0.0694031	-0.0979391
	38.616	-0.0144605	-0.0479904	-0.0282973	-0.0400766	-0.037262	-0.0179943	0.0511342	0.124763	0.101734	0.0631474	0.08372	0.0514638	0.00297921	-0.0103366	-0.0109044	-0.0214034	-0.0752142	-0.0705069	-0.0660246	-0.0656015	-0.0830612	-0.0432875	-0.0416531	-0.0642076	-0.0274667	-0.0180165	-0.00669366	1.54438e-05	0.0417419	0.0989753	0.170785	0.26184	0.338583	0.32146	0.202355	0.157758	0.10012	0.10413	0.0811793	0.0874765	0.0666455	0.0204567	0.00291686	-0.0290054	-0.0518938	-0.0727515	-0.0670377	-0.0766839
	40.911	0.0982944	0.0558441	0.0583597	0.0879873	0.155263	0.104178	0.0460129	-0.000632335	-0.0178093	-0.000214231	-0.00488268	0.0363457	0.0349666	0.0297068	0.0554722	0.033613	0.0507183	-0.000373619	-0.0610565	-0.063646	-0.0474739	-0.0691715	-0.0491394	-0.0602711	-0.0679587	-0.109097	-0.0708808	-0.0724424	-0.0610126	-0.0549882	-0.0357115	0.168381	0.352084	0.336686	0.275915	0.235149	0.170566	0.133168	0.0856081	0.0891701	0.0221393	0.0350844	-0.0125472	-0.0211333	-0.0535537	-0.0694833	-0.102772	-0.119522
	37.709	0.0372559	0.00850155	0.00906623	-0.0250261	-0.0312483	-0.0384849	-0.01796	0.0116595	0.0247113	0.0277138	0.0152267	0.0103576	0.0211548	0.0311424	-0.00137306	-0.0262343	-0.0285186	-0.036273	-0.0490307	-0.0501111	-0.0391923	-0.0253414	0.00703975	0.00996121	0.00653259	0.0406377	0.033024	0.00486836	-0.000296952	0.0549552	0.149648	0.214551	0.249068	0.226629	0.162506	0.0979867	0.0975328	0.0973325	0.0888536	0.0692898	0.0233987	0.0275156	0.00336394	-0.0168519	-0.0590395	-0.0812329	-0.078565	-0.0275768
	33.829	0.0173709	0.00899459	0.00803577	-0.00715983	0.0156123	0.0241723	0.0116672	-0.00642727	-0.00984589	0.0219208	-0.00350599	-0.0129576	-0.0243604	-0.0472222	-0.0556007	-0.0398831	-0.0314553	0.0102514	0.0133496	-0.00258524	-0.0272795	-7.61683e-05	-0.0144765	-0.0187778	-0.00637798	-0.0206551	-0.0157131	0.00614948	0.0513577	0.124311	0.253874	0.336631	0.335755	0.314197	0.239904	0.176426	0.155832	0.148011	0.0799947	0.0547987	0.00677451	-0.0226153	-0.0423698	-0.0364219	-0.0416283	-0.0421189	-0.0567029	-0.0674001
2	99.15	-0.0064009	2.00195e-05	0.00338413	0.0134282	0.00503505	0.0134463	-0.0216247	-0.0191182	-0.0492908	-0.00328183	-0.0183892	-0.0434784	-0.0454547	-0.0190841	-0.0194838	-0.0176179	-0.0159389	-0.0240168	-0.0147198	-0.00589277	0.00808383	0.0273225	0.0207148	0.0344584	0.0337173	0.0359427	0.0305842	0.0289051	0.0320664	0.0216065	0.0150772	0.0526808	0.0397004	0.0225224	0.020775	-0.0162643	-0.0476278	-0.0556253	-0.0368305	-0.0442757	-0.0570151	-0.0523114	-0.0329763	-0.0185418	-0.0315704	0.0111728	0.0722589	0.0985974
	44.85	-0.00792016	-0.016859	-0.0414676	-0.038044	-0.00851091	0.00693761	0.0228537	0.0257687	0.01433	0.0388154	0.0600187	0.0512669	0.0243317	0.00708131	0.0102997	0.00821491	0.0248084	0.00709727	-0.0291439	-0.0453201	-0.0511477	-0.0574134	-0.0304874	-0.0143249	-0.00375068	-0.00935941	0.0138031	0.0213711	0.00752152	0.0133743	0.0272855	0.0687545	0.0484933	0.0170716	-0.0294108	-0.0488874	-0.0634623	-0.0690209	-0.0530477	-0.0669544	-0.0768124	-0.0682887	-0.0732588	0.0445177	0.140667	0.152151	0.0970012	0.0462877
	36.716	-0.00461724	-0.0147742	-0.000760776	0.0120776	0.0312882	0.0514561	0.0367402	0.0236866	0.0147443	0.00504495	-0.0016513	0.00912158	-0.00613361	-0.0295421	-0.0376829	-0.00549788	0.0115854	-0.0136536	-0.0319168	-0.0121323	0.00198006	0.00864416	0.000389485	-0.0207951	-0.0179974	0.00248717	-0.00358572	0.0106701	0.00459474	-0.00439709	-0.0193728	0.00558669	0.0847766	0.204263	0.157345	0.121768	0.167803	0.197435	0.14511	0.0912453	0.0413042	-0.00234641	-0.0161025	-0.0354146	-0.0530989	-0.0615045	-0.0363051	-0.0518571
	37.596	-0.029096	-0.0284242	-0.0326684	-0.0156599	-0.000408164	0.00138937	0.000985377	0.0122426	0.0211395	0.000710754	0.00364536	0.00706339	-0.00025837	-0.00170865	0.00079246	-0.00383528	-0.00879211	-0.00191292	0.0332343	0.0396595	0.0426759	0.000347617	-0.024929	-0.0415494	-0.0474073	-0.0199541	-0.0153354	0.00145973	0.0301499	0.0385906	0.0378529	0.0645958	0.160675	0.169068	0.177854	0.153973	0.118637	0.144311	0.154586	0.0892188	0.0375488	0.0286905	-0.0109505	-0.0276299	-0.0431132	-0.0490709	-0.0531131	-0.0643068
	33.666	0.00730891	-0.0252136	-0.0411775	-0.0297667	-0.0445697	-0.0438043	-0.0180812	0.0181858	0.0042346	-0.0144664	-0.0215144	-0.0205221	-0.037433	-0.0502859	-0.0366309	-0.0412445	0.00234504	0.0296507	0.0516206	0.0560353	0.0269634	0.0163243	0.0272833	0.0368781	0.0237485	0.024542	0.0205683	0.0185576	0.0377862	0.00576959	0.016908	0.137046	0.247214	0.219642	0.167764	0.0891459	0.0556246	0.0358534	-0.00421437	-0.036966	-0.0469521	-0.0565556	-0.0719899	-0.075248	-0.0762403	-0.0723985	-0.074794	-0.0581619
	37.427	-0.049263	-0.0506132	-0.0618472	-0.0693731	-0.0640261	-0.023799	0.0356327	0.0494157	0.0583475	0.0500954	0.0410681	0.0335236	0.0320967	0.0454933	0.0657919	0.0428792	0.015632	-0.0157331	-0.0269951	-0.0209032	-0.0294207	-0.039414	-0.0173812	-0.00694322	-0.00823516	0.0124545	0.00920256	0.0370736	0.0154551	-0.0106817	-0.019688	0.0492155	0.0977622	0.104494	0.0999876	0.0918123	0.0729826	0.0825522	0.0554634	0.0267846	0.00349707	-0.0183938	-0.0375331	-0.0402241	-0.0428708	-0.0521356	-0.0582414	-0.0584603
	40.367	0.00498055	0.0184647	0.0220082	0.0204404	-0.00139979	-0.00856996	-0.0297152	-0.0231973	-0.0232756	-0.0168336	-0.00882375	-0.014234	0.00379699	-0.000251801	0.0270674	0.0533715	0.038692	0.0366	0.0257748	-0.0100476	-0.0123341	0.0335355	0.0200586	0.0207986	-0.00272092	-0.0319092	-0.0420063	-0.0372934	-0.0287356	-0.0239326	-0.0158777	0.045357	0.122739	0.136667	0.168673	0.14864	0.11357	0.0873131	0.0934799	0.122357	0.108546	0.0654017	0.0375298	0.00261342	-0.0193739	-0.0271346	-0.0169474	-0.0258609
3	35.154	-0.135043	-0.102724	-0.089285	-0.0728463	-0.0286313	0.0300919	0.0756646	0.0509828	0.0610595	0.0593598	0.059228	0.0519924	0.0240533	0.0211092	0.00846755	0.029754	0.0363633	0.0561973	0.0455664	0.0119267	-0.017813	-0.0160309	-0.042093	-0.0432447	-0.0306442	-0.00290502	-0.0137399	-0.0184784	-0.0153015	-0.000706731	0.00767024	0.0377787	0.0229593	0.0686536	0.0568875	-0.0353539	-0.0181921	-0.0784914	-0.0932242	-0.0890358	-0.0858506	-0.124163	-0.124173	-0.150198	-0.18438	-0.204583	-0.2071	-0.217432
	35.091	-0.0744079	-0.0671261	-0.0910237	-0.0780855	-0.0502016	-0.0602512	-0.0337288	-0.00528063	0.00729985	0.0163478	0.0569676	0.0380253	0.03852	0.0392008	0.0145713	0.0292268	0.0371892	0.0575645	0.0496736	0.0483898	0.0328043	0.012568	0.00695641	0.00380822	-0.0106857	-0.0125215	-0.0298712	-0.0272525	-0.0299735	0.0166626	0.0646336	0.105623	0.118609	0.0482651	0.0168977	0.0273501	-0.00532561	-0.0466936	-0.061995	-0.0814872	-0.102269	-0.114701	-0.124057	-0.133273	-0.148135	-0.156187	-0.165016	-0.162436
	36.547	0.0120582	0.0401301	0.0173376	0.0188539	0.0537282	0.0405615	0.0113738	0.00911147	-0.00556269	-0.0115772	0.0401213	0.0710872	0.0380043	0.0654688	0.0153482	-0.00873828	-0.0372041	-0.0306373	-0.049616	-0.0688104	-0.0781347	-0.0478268	-0.011038	-0.000503318	0.00831703	0.0156827	-0.000371277	-0.0200454	-0.0210819	-0.035437	-0.0305999	0.0116379	0.0688315	0.0711048	0.0464791	0.00699221	0.00606353	-0.0232826	-0.0743891	-0.0850954	-0.078643	-0.126002	-0.123684	-0.148845	-0.172843	-0.168946	-0.184346	-0.194333
	36.143	0.110076	0.109669	0.0580518	0.0353985	-0.0137308	-0.0141904	-0.0139553	0.010856	0.0109471	-0.0732201	-0.0945541	-0.0880548	-0.061886	-0.050681	-0.0432245	-0.0308146	0.0292147	0.0623995	0.0308707	0.0346869	-0.0218883	-0.0344507	0.00649352	0.00787004	0.00165026	-0.0173034	-0.0339425	0.000339384	0.0132914	0.0325416	0.0375395	0.0500786	0.0205341	-0.0558716	-0.0404143	-0.0502278	-0.0338387	-0.0392855	-0.0654078	-0.0925825	-0.0996854	-0.129785	-0.162834	-0.191468	-0.227366	-0.232164	-0.242114	-0.228952
	37.652	-0.0307666	0.0334914	0.0386587	0.022724	0.0087228	0.0103557	0.0158191	-0.00792925	-0.0290631	-0.0293683	-0.0125864	-0.0245153	-0.0345584	-0.0380382	-0.00984679	0.000421826	-0.0070092	0.054188	0.137712	0.0557207	0.0224234	0.00706944	-0.0204456	-0.0220261	-0.0345265	-0.0206392	-0.00695682	0.00536597	-0.0281499	-0.029218	0.0117107	0.12687	0.140304	0.0682165	0.0248306	0.0196222	-0.0665485	-0.0757832	-0.096744	-0.11594	-0.159945	-0.164917	-0.185411	-0.210136	-0.218319	-0.235137	-0.244371	-0.243814
	35.113	-0.0606503	-0.0567045	-0.0820968	-0.0946701	-0.0887682	-0.0703303	-0.036005	-0.0650823	-0.0411393	-0.00406615	-0.00397859	0.0542673	0.0451015	0.00574055	-0.0234094	0.036679	0.0223452	0.0271051	0.084196	0.0830745	0.104189	0.127369	0.123147	0.0694524	0.00940688	-0.0244154	-0.042123	-0.0260139	-0.0114677	0.00417006	0.0258122	0.0519609	0.0285247	-0.0413778	-0.0824359	-0.096805	-0.0981352	-0.127335	-0.162946	-0.183949	-0.205633	-0.222258	-0.230347	-0.235569	-0.245888	-0.252716	-0.250912	-0.259961
	34.254	0.0780506	0.103704	0.0100392	-0.0804172	-0.110765	-0.102352	-0.107934	-0.104161	-0.0939915	-0.0633115	-0.0176049	-0.0151077	-0.0316058	-0.0229097	-0.0147199	0.00493268	0.0286984	0.0790008	0.0500618	0.0512382	0.0168931	0.0424473	0.0629272	0.108808	0.0948569	0.0480149	0.00281251	0.00777035	-0.0355251	-0.0543632	-0.0154934	0.00998318	0.00803969	-0.0331787	-0.0398	-0.0709777	-0.106506	-0.134363	-0.163966	-0.17004	-0.186467	-0.181104	-0.176025	-0.177426	-0.195372	-0.200668	-0.208966	-0.21242
4	48.751	0.0302736	0.00407686	-0.0124356	-0.0182963	-0.0141246	-0.0114217	-0.00541252	0.00125789	0.0079631	0.00480307	0.00949207	0.0105941	0.0300114	0.0141231	0.00545503	0.00810463	0.00364996	-0.000363888	-0.0111595	0.00010014	0.0106104	0.00744803	0.00435064	-0.000445093	-0.000867359	-0.00880688	-0.0167348	-0.0204911	-0.00809924	-0.00950757	-0.0141478	0.0155871	0.0372595	0.0723308	0.0586698	0.0407328	0.028037	0.00972177	0.00219059	0.006397	-0.00763057	0.0211067	0.0165035	0.0483475	0.0582614	0.0721359	0.0475795	0.0117101
	40.156	-0.0113067	-0.00170497	-0.00364561	-0.0100282	-0.0104163	-0.00692567	-0.010812	-0.0172453	-0.0164615	-0.0172707	-0.00908448	-0.00552283	-0.0148836	-0.0205711	-0.019668	-0.0248354	-0.021053	-0.0216238	-0.0149622	-0.00489371	0.00306419	0.0227446	0.0426609	0.0330389	0.0251647	0.0256213	0.0199186	0.0210069	0.020464	0.0197309	0.0295001	0.0384067	0.0610983	0.0990106	0.0754489	0.0846016	0.0902942	0.0576026	0.0367299	0.0598299	0.0722069	0.069972	0.0513215	0.032567	0.0210627	0.011532	-0.0107131	-0.0197339
	39.771	-0.0345476	-0.0240439	-0.0345084	-0.00726442	0.0115948	0.0332725	-0.000800229	0.0073742	0.0187269	0.0380901	0.014707	-0.0090236	-0.0178244	-0.0138045	0.00031302	-0.00176912	0.00608479	0.0337007	0.0320394	0.0194952	0.0236472	0.00834065	-0.00885722	-0.00507951	0.00373106	0.0192285	0.00381914	-0.0271879	-0.0426927	-0.0248391	-0.00813055	0.0268084	0.0932559	0.0808046	0.0477595	0.0248216	0.0140904	-0.000531092	0.0104693	0.0562593	0.0534701	0.0292453	-0.00173732	-0.0180152	-0.0280834	-0.0332998	-0.0454256	-0.0593229
	43.614	0.00503922	0.00487508	-0.00107365	-0.0193091	-0.00420899	0.00371774	0.0024615	-0.00650683	0.000447731	0.00301703	0.00910043	0.0101799	0.00459732	-0.000890575	-0.005602	-0.0180403	0.00103482	-0.000785362	-0.0149281	-0.011799	0.0121411	0.0245478	0.0509057	0.019447	0.00367987	-0.000238256	-0.0211609	-0.0213524	-0.0271306	-0.0225602	0.00270139	0.0538432	0.0742376	0.0697703	0.0201057	0.00798307	0.0213261	0.0234725	-0.00587976	-0.0258134	-0.0384663	-0.0551088	-0.0376014	-0.0278398	-0.0496546	-0.0530487	-0.0551804	-0.0500039
	43.019	-0.0158876	-0.0122684	0.00518288	-2.67998e-05	0.0161255	0.0481157	0.0462866	0.0767024	0.0560129	-0.00240444	-0.0148572	-0.0117888	-0.0163145	0.0043934	-0.0191053	-0.0104599	-0.00676955	-0.0140746	-0.0134366	-0.0279158	-0.0229769	-0.032336	-0.0214829	-0.00358637	-0.0192062	-0.0167781	0.0111293	0.011384	0.00362916	0.00787494	0.0211814	0.0836242	0.11874	0.091861	0.113021	0.0930957	0.0387681	0.0109962	-0.0221324	-0.0385211	6.50008e-05	0.00884573	0.00455175	-0.0293892	-0.0468887	-0.0488808	-0.0416171	-0.0398224
	43.551	-0.0154005	-0.0174881	0.00700465	0.0184889	0.00573153	-0.00421539	0.0141477	0.00757242	0.00772092	0.0157614	0.00215676	-0.00691667	-0.00512819	-0.010736	-0.00411057	-0.00463903	-0.00693195	-0.0181935	-0.0209952	-0.0114916	-0.000278109	-0.0137954	-0.00387909	0.00556557	-0.00501463	0.00414832	0.0256538	0.0390488	0.0167419	-0.00137653	0.00683214	0.0569074	0.0727744	0.0432656	0.0445474	0.0196878	0.00474667	0.031148	0.0303335	0.00202137	-0.00336591	-0.023358	-0.0327787	-0.0280836	-0.0368863	-0.0356503	-0.0355455	-0.0378952
	41.643	-0.0051049	-0.00510037	0.00737997	0.0464891	0.0375668	0.0081699	0.0121603	0.00488119	-0.00778475	-0.00252689	0.00527049	-0.0147243	-0.0184227	-0.00554173	-0.00886213	-0.00979691	0.00368838	0.00298899	0.00145668	-0.00532897	-0.0128638	-0.0083076	0.000931568	-0.00573412	0.00518222	0.00726001	-0.0177595	-0.0130766	-0.00549873	-0.00175734	0.00476575	0.0508303	0.0524169	0.0261797	0.0210984	-0.00516148	0.00483818	-0.00549646	0.00257932	0.00915447	-0.00525655	0.00866558	0.0105351	0.00264948	-0.0154146	-0.023169	-0.0424577	-0.0409819
5	43.643	0.0635296	0.0990304	0.102521	0.0803097	0.0515022	0.059839	0.0110386	-0.0260153	0.00528485	0.0133085	-0.00290667	-0.00291313	-0.0180305	-0.0113307	-0.0243073	-0.023287	-0.0382655	-0.0410616	-0.0505899	-0.0640573	-0.106306	-0.059608	-0.0249143	0.0261043	0.037544	0.0256878	-0.00862814	-0.00596759	-0.0140816	-0.0177173	-0.0357115	-0.0142624	0.0352289	0.0648631	0.0621831	0.0174607	0.0103476	0.00289875	-0.0183598	-0.0298124	-0.0363702	0.00593384	0.0516443	0.0365108	0.0380283	0.0233404	-0.0136554	-0.0179175
	52.145	-0.0551461	-0.00941504	-0.0253188	-0.0194949	-0.0056283	0.016631	0.0141056	0.0282869	0.0285147	0.0237542	0.013601	0.0193327	0.00713972	0.0145586	0.0134003	0.00066484	-0.0139098	-0.00782276	-0.000550387	-0.0122687	-0.00645835	0.00661349	0.0123831	0.00183124	-0.00360744	-0.00473858	-0.0167308	0.000382734	0.00170918	0.0169836	0.0189882	0.0610627	0.14178	0.224693	0.253031	0.196797	0.149115	0.119198	0.0851204	0.0889126	0.137991	0.172012	0.232874	0.217266	0.210256	0.221324	0.157104	0.11274
	41.667	-0.0245089	-0.0408663	-0.05436	-0.111649	-0.0654168	-0.0796356	-0.0774499	-0.0609014	-0.00323307	-0.00350007	0.00296278	-0.0200459	-0.0110518	0.0204981	0.030534	0.066861	0.0276441	0.0497445	0.106798	0.116909	0.139921	0.0896917	0.0765775	0.0495901	0.0161058	-0.0220903	-0.0771096	-0.0620662	-0.0463894	-0.00741861	-0.00207871	0.043279	0.106264	0.104361	0.119433	0.12282	0.0877259	0.0626598	0.0363974	0.0441429	0.0408918	-0.0164781	-0.0230483	-0.056263	-0.0469862	-0.0567028	-0.0735653	-0.0848001
	45.546	0.0478482	0.0642213	0.0200199	0.0173948	0.0405327	0.0328819	0.0100014	0.00484406	-0.000489929	-0.00211826	0.0149403	-0.016438	-0.0547757	-0.0415125	-0.0526475	-0.0732291	-0.0519261	-0.0218349	-0.0185453	-0.00413273	-0.00635971	0.0142638	0.00279966	-0.000950891	-0.00839213	-0.00711401	0.0185951	0.00583782	-0.00180696	0.00269191	0.0179695	0.0609048	0.115547	0.126197	0.11883	0.0667925	0.0397335	0.0431219	0.0530325	0.053706	0.0128181	0.0182988	0.0507128	0.0349173	0.00599646	0.0101571	0.00811868	-0.00365081
	42.541	-0.016476	-0.0449706	-0.0523303	-0.0478719	-0.021994	0.025444	0.0173815	0.0329731	0.0173635	0.00292158	0.0242006	0.0195656	-0.00307214	-0.00954523	0.00664469	0.0155326	0.00494712	-0.00554821	0.0157344	0.0189745	-0.00656819	0.0118059	0.0154316	0.00944152	-0.0176474	-0.0469493	-0.0446606	-0.0205704	0.0588691	0.0497757	-0.00880277	-0.0348861	0.0496496	0.104163	0.0836513	0.044301	-0.00305052	-0.0566625	-0.0371784	-0.00852525	0.0135935	0.0572724	0.0686399	0.0349158	0.0228923	-0.0301899	-0.0504777	-0.0625697
6	73.78	0.157351	0.225569	0.14787	0.089916	0.124259	0.0983307	0.0433125	-0.00795057	-0.0245156	-0.0292867	-0.0110275	-0.0131532	-0.0106165	-0.0406726	-0.0497449	-0.096968	-0.078562	-0.0361599	0.00452167	-0.0148708	-0.0533122	-0.0728133	-0.0874259	-0.104928	-0.088066	-0.0190282	0.0146069	-0.0372874	-0.0738703	-0.0784035	-0.0476721	-0.0122284	0.00815354	0.0571852	0.0890294	0.100424	0.0194602	-0.0169407	-0.0191163	0.00594565	-0.043406	-0.0583357	-0.0409662	-0.0384823	-0.046527	-0.0416914	-0.0376632	-0.0419439
	43.406	0.00546531	-0.0158596	0.0972731	0.13491	0.0276134	0.010067	0.00330453	-0.0441957	-0.0558571	-0.0294732	-0.0273667	-0.0578321	-0.0253574	0.0554121	0.086069	0.00220698	-0.0318112	-0.0377676	-0.0224963	-0.0231794	-0.0562715	-0.0612448	-0.03637	0.0307717	0.00996696	-0.0360441	-0.00760517	0.0458658	-0.0123155	0.0416271	0.128642	0.22115	0.179392	0.171349	0.168785	0.107531	0.120959	0.0849858	0.0449426	0.00462501	-0.0109493	-0.0216274	-0.0562029	-0.101605	-0.0884175	-0.110714	-0.147736	-0.176558
	50.336	0.00429946	-0.0103287	-0.0220024	-0.0365242	-0.021824	-0.0141582	0.0996003	0.0902257	0.0469864	0.0111074	-0.0069659	-0.011612	-0.0240956	-0.0255299	-0.0323619	-0.0416919	0.0216693	0.0357004	0.0210276	0.0284429	0.00652989	-0.00973162	-0.0223455	-0.025523	-0.0156302	0.00707205	-0.00285505	-0.0183102	-0.0152047	-0.0212269	0.00526026	0.0562821	0.104627	0.119314	0.0928404	0.0863379	0.0398593	0.0024911	-0.0128988	0.0211992	0.039173	0.0458368	0.0533105	0.0134133	-0.0176308	-0.0162548	0.0240267	0.0516943
	37.586	0.240745	0.184134	0.102433	0.0755618	0.0429543	0.00580255	-0.0358696	-0.0493828	-0.0617697	-0.0542318	-0.0441783	0.0027611	-0.0023807	-0.0316958	-0.0694511	-0.067291	-0.0305306	0.0248789	0.0738857	0.00923539	-0.0149379	0.0261875	0.0322076	0.0158083	-0.029939	-0.0182901	-0.0302796	-0.0621133	-0.0957187	-0.0944101	-0.0441245	0.0855227	0.152551	0.150475	0.1396	0.227312	0.142056	0.0613614	0.038679	-0.027283	-0.0799438	-0.117597	-0.142975	-0.167904	-0.177112	-0.19188	-0.203484	-0.207425
	39.014	-0.00580207	-0.0335494	-0.0455932	-0.0773898	-0.0786288	-0.0517309	-0.0430246	0.0265217	0.115008	0.256821	0.313306	0.241412	0.114666	0.05118	0.0133196	-0.022758	-0.0233825	-0.0291879	-0.0361482	-0.014411	0.0317361	0.00802459	-0.0270558	-0.0829567	-0.110556	-0.117886	-0.0337777	-0.0766176	-0.102219	-0.0919954	-0.0673237	0.03366	0.133932	0.137474	0.106685	0.0770874	0.131236	0.0913506	0.0604504	0.00176264	-0.0195347	-0.0635262	-0.113545	-0.142185	-0.16446	-0.179196	-0.192704	-0.19909
7	56.998	0.0184153	-0.0340584	-0.0589636	-0.0638252	-0.0139233	-0.0187493	-0.00249232	-0.0196032	-0.026503	-0.00518107	0.00169582	-0.00695747	-0.0301091	-0.0129805	0.0641443	0.038985	0.0263266	0.0299022	0.03745	0.000376857	-0.0288944	-0.0179005	-0.0149653	-0.0421526	-0.0437435	-0.0330063	0.00959432	0.0839669	0.0803404	0.0485125	0.0342988	0.0351527	0.0427792	0.0966278	0.0807749	0.0437704	0.00870231	-0.0238625	-0.0332477	-0.0404728	-0.0236084	-0.0234889	-0.0439036	-0.0367776	-0.029179	-0.0453115	-0.0519978	-0.071955
	37.341	-0.0262686	-0.047626	-0.0192682	0.0276495	0.047644	0.0287175	0.0462386	-0.00875021	-0.0361118	-0.022071	-0.00858283	0.00646749	0.0115657	0.0253833	0.0379549	0.00211843	-0.0334524	0.00871507	0.059214	0.0252425	0.0162947	0.0811718	0.081472	0.0113293	-0.00346333	-0.0174802	-0.0777691	-0.094448	-0.0356522	-0.0125281	-0.073707	-0.0342414	0.010511	-0.0359763	0.0163558	0.000604104	0.0619451	-0.00237939	-0.0282851	-0.00399202	-0.0282133	-0.0461382	-0.0421797	-0.0526817	-0.077267	-0.0837521	-0.0822962	-0.0845889
	37.196	0.0170657	-0.011224	0.0163356	0.00883865	-0.015167	-0.0202182	0.0262915	0.0581002	-0.0299358	-0.0708501	-0.0094907	-0.00925027	-0.00215983	-0.0145528	0.000275047	0.000438975	-0.0118556	-0.0245633	-0.0231864	-0.0098426	0.00596226	0.0149805	0.013739	-0.0107628	0.0518315	0.063689	0.0545965	-0.0361607	-0.0427637	-0.0323729	-0.0592331	-0.0826464	-0.0349433	-0.00741428	0.0259331	0.008725	-0.0423878	-0.117959	-0.0139299	-0.0433779	-0.0687627	-0.0969759	-0.110101	-0.128323	-0.138168	-0.13513	-0.149345	-0.153544
	42.439	-0.000106939	0.0259386	0.0206389	0.0045706	-0.00115029	-0.0223173	-0.0300419	-0.0426451	-0.0338356	-0.0272724	-0.0409285	-0.0321382	0.000907697	0.0145319	0.0106425	-0.00717749	-0.0205432	-0.0178918	0.00618189	0.0186032	0.0113061	0.0021042	-0.0124804	0.00223821	0.013128	-0.00313808	-0.000237757	0.0383439	0.0628643	0.042294	0.0176109	0.0317552	0.0521085	0.0376675	0.0740349	0.150752	0.15504	0.131116	0.115128	0.0634929	0.0849055	0.0995061	0.0886897	0.0118773	0.0246495	-0.00499506	-0.0405169	-0.0281052
	38.386	0.0128023	-0.00742433	-0.0188929	-0.034322	-0.0636617	-0.022839	0.0145314	0.0452048	0.0483223	0.00589171	0.0488362	0.0621262	-0.0465469	-0.0275153	-0.0346828	-0.0487407	-0.0676626	-0.0675847	-0.0722899	-0.0652176	0.0388946	0.0348995	0.0907905	0.0408921	0.0392468	0.0446765	-0.000453108	0.000101125	0.00963856	0.0350294	-0.0264097	-0.00145766	-0.0121036	0.0171871	0.0234367	0.0442724	-0.00422882	-0.0216381	-0.0977933	-0.0800203	-0.104418	-0.133541	-0.16226	-0.172084	-0.190443	-0.168421	-0.193733	-0.182193
8	49.525	0.0260482	-0.00647059	-0.0240225	-0.0249398	-0.0324788	-0.0404595	-0.0106555	0.0218138	0.120911	0.0733762	-0.00553787	-0.0554757	-0.0467384	-0.0597348	-0.0681386	-0.07695	-0.0142752	-0.00685048	-0.00503444	-0.0131757	-0.0100409	-0.0337729	-0.0166595	0.035956	0.0509754	0.0173942	0.048449	0.069355	0.0561208	0.01997	0.0110412	0.0150686	0.102096	0.0714243	0.218857	0.166652	0.085792	0.0323487	0.0068192	-0.0073539	-0.0118508	0.00247677	-0.017163	-0.0410586	-0.0586075	-0.0725026	-4.65266e-05	0.0936769
	36.349	0.131034	0.127061	0.0648993	0.0195434	0.0531032	0.0693307	0.036873	0.00672209	-0.00392627	0.00635186	0.00962127	-0.00896423	-0.0199088	0.00334162	-0.000947345	-0.0431648	-0.050034	-0.0289765	-0.0257157	-0.0456966	-0.0386025	-0.0247331	-0.00637547	-0.0162663	-0.0427946	-0.0409093	-0.0416811	-0.0345186	-0.0258267	-0.0385655	0.00972664	0.0340849	0.0381887	0.0549943	0.0305876	0.254946	0.366981	0.427983	0.292063	0.201881	0.133674	0.0887079	0.064213	0.0425916	0.0251937	0.017641	0.00313657	0.00123985
	57.609	0.000278127	-0.0679489	0.00675055	0.007267	-0.0327702	-0.048589	-0.0975566	-0.119671	-0.114057	-0.0866058	-0.0662178	-0.114437	-0.0780987	0.0432586	0.115589	0.0385508	-0.0259606	-0.0199425	0.0162954	0.11984	0.183132	0.124081	0.106835	0.0551754	0.0481411	0.0364826	0.0878244	0.0125941	-0.00124255	-0.0584543	-0.0705431	-0.0423533	-0.0753514	-0.0318234	-0.049928	-0.0905318	-0.116151	-0.140276	-0.14476	-0.150256	-0.14612	-0.127836	-0.143217	-0.147622	-0.157611	-0.142603	-0.149479	-0.153726
	35.224	-0.0181144	-0.0315969	0.010867	0.0581922	0.0557965	0.0273308	0.0741203	-0.00595288	-0.0534811	-0.0820532	-0.100058	-0.0770389	-0.0177351	-0.0335668	0.0274772	0.14123	0.113666	0.0526189	0.000668587	-0.0177451	-0.0406308	-0.0427636	0.0232149	0.00974233	0.0438013	0.00276151	-0.0107742	-0.0134827	-0.0223069	-0.0299865	-0.044201	-0.0214218	0.000345832	0.11152	0.195413	0.177362	0.195117	0.0661047	-0.0038766	-0.0498609	-0.0847185	-0.100993	-0.106999	-0.117486	-0.123679	-0.125522	-0.124437	-0.124471
	34.748	-0.0323349	-0.0528827	-0.0459708	-0.0369086	-0.0475188	-0.0783273	-0.0684632	-0.0491345	-0.00919038	0.0412582	0.105545	0.112619	0.0454324	0.0374806	0.0274049	0.0431235	0.0813579	0.0896946	0.110892	0.0697049	0.0475444	0.021389	-0.0212459	-0.0270621	-0.0351314	-0.0470283	-0.0700612	-0.0816496	-0.0774989	-0.0206525	-0.0245946	0.0249022	0.0115748	0.0914864	0.125594	0.0776773	2.16051e-05	-0.0524186	-0.085483	-0.10574	-0.108422	-0.120521	-0.122067	-0.12021	-0.119023	-0.126893	-0.130077	-0.107758
[truncated: 313 more columns]

## Sheet: Figure 7-supplement 2h,i
Treatment	Mouse#	latency to feeding onset (s)	dF/F
			time (s), food presented at 30s
			1	2	3	4	5	6	7	8	9	10	11	12	13	14	15	16	17	18	19	20	21	22	23	24	25	26	27	28	29	30	31	32	33	34	35	36	37	38	39	40	41	42	43	44	45	46	47
Saline	1	42.912	0.0054885	0.00458506	0.00445905	0.00474435	0.00466589	0.0019532	-0.000873604	-0.000973458	-0.00124924	-0.00203381	-0.00278271	-0.00226204	-0.00370279	-0.00155118	-0.00294438	-0.00161537	-0.00397382	-0.00146084	0.004043	0.00496545	0.00476337	0.00418802	0.00286615	0.00315382	0.00166553	0.000162972	-0.00166055	-0.00423296	-0.0055905	-0.00675546	-0.00804167	-0.008724	-0.0082176	-0.00690524	-0.00751149	-0.00499375	-0.00730941	-0.00753051	-0.00635129	-0.00684342	-0.00492243	0.000899986	-0.00483446	9.64024e-05	0.00511286	0.0186573	0.0302926
		35.482	0.0078986	0.0194037	0.0412614	0.0276452	0.0272842	0.0129334	0.0151753	0.00955787	0.0192771	0.0220869	0.0223761	0.00835458	0.00161194	0.00185049	0.00175338	0.000119444	-0.00285289	-0.0118438	-0.0185632	-0.0209719	-0.0210669	-0.0174823	-0.0127346	-0.0070834	-0.0143074	-0.0228971	-0.0203449	-0.0158421	-0.0121077	-0.0193844	-0.021107	-0.0175752	-0.0197179	-0.024415	-0.0273092	-0.0302098	-0.0191395	-0.00603422	0.00149161	0.0100434	0.0237546	0.0199315	0.0144428	0.0342084	0.0351753	0.0276579	0.027432
	2	47.603	-0.000965186	-0.00114924	-0.000736703	-0.00076209	-0.00139254	-0.00111539	0.000183579	-0.000628808	-0.00122117	-0.00042148	0.000991734	0.00264824	0.00286191	-0.000910181	-0.000939799	-0.00130368	-0.0011979	-0.00211395	-0.00142004	-0.00189605	-0.00218588	-0.00301731	-0.00242283	0.00207915	0.000803446	0.00167084	0.00100866	0.0028196	0.00359602	0.00393452	0.00320252	0.00255727	0.00270748	0.0025615	0.00209184	0.00222512	0.00380124	0.00477441	0.00748236	0.00604164	0.00756064	0.00764526	0.0112037	0.0107594	0.0100782	0.0127206	0.014906
		37.613	-0.000570417	-0.00156407	-0.00113178	-0.00137968	-0.00043315	-0.00266426	-0.00141451	-0.000605246	0.000589187	-0.00138583	-0.00231187	-0.00188573	-0.00173002	-0.00235285	-0.00237538	-0.00146163	-0.00122397	-0.000719977	-0.00164192	-0.0015108	-0.000976074	0.00127143	0.00209913	0.00204791	0.00126938	0.00233269	0.00365005	0.00373405	0.00460273	0.0038119	0.00393073	0.00367668	0.000128213	-0.000109444	0.00234908	0.00696291	0.0103577	0.0107531	0.0160164	0.0215235	0.023478	0.0232629	0.0283234	0.0278091	0.0289954	0.0311896	0.035447
	3	47.626	-0.00761166	-1.49683e-05	0.000431299	-0.00237562	0.00176757	0.00613642	-0.000864398	0.00546195	0.00742959	0.00307848	0.00183856	-0.000319242	-0.00726682	-0.00488841	0.00035016	-0.00290556	-0.0021246	0.0021403	-0.00158958	-0.00186089	-0.00219052	-0.000937931	-0.0017899	-0.0036916	-0.00361046	0.00111591	0.0128964	0.0147347	0.00446799	-0.00145012	-0.00721864	-0.00784494	-0.0124851	-0.0187988	-0.0185249	-0.0215296	-0.0270928	-0.0269279	-0.0275441	-0.025754	-0.0258731	-0.0227467	-0.0217375	-0.0259061	-0.0284316	-0.0275644	-0.0218111
		47.061	-0.00566324	-0.00129471	-0.000904714	0.000548657	-0.0017801	0.000904985	0.00186455	0.00630041	0.00774817	0.0100377	0.00867126	0.00679703	0.00478812	0.00103405	-0.00174643	-0.00229075	-0.00708014	-0.00479907	-0.00511612	-0.00381707	-0.00113759	0.00141563	0.00236397	-0.000792485	-0.00117968	-0.00258535	-0.00106184	-0.0016314	-0.00210276	-0.00503476	-0.00245629	-0.00585123	-0.00253485	0.00258843	0.00192627	-0.000671838	-0.00513015	-0.00806776	-0.0044708	-0.0019765	-0.00238614	0.000672109	0.00151102	0.00360691	0.0117211	0.0181322	0.0206994
		38.367	0.00013442	0.00239554	0.00428095	0.00759863	-0.000336932	-0.00266637	0.00357506	0.00370713	0.00777852	0.00522365	0.00594321	0.00987342	0.00702481	0.00713411	0.000819816	0.00187637	0.00544681	0.00178074	0.00159629	0.00140958	-0.00193771	-0.0043309	-0.00149368	-0.00873246	-0.0110756	-0.0104038	-0.0128995	-0.00808805	-0.0043901	-0.00736622	-0.00387776	-0.0097708	-0.00900571	-0.0113055	-0.0134255	-0.0130976	-0.00188306	0.000544291	0.00389385	0.0120731	0.0196511	0.0197741	0.0326327	0.0450472	0.0503573	0.05633	0.0883068
	4	38.089	-0.0198317	-0.031652	-0.0530405	-0.0138903	-0.0276189	-0.0336697	-0.030237	-0.0118727	0.0105671	0.0286434	0.0110045	0.026686	0.0371181	0.0516613	0.0593994	0.031016	0.00302095	-0.00722359	-0.0048265	-0.014801	-0.0325202	-0.0100113	0.00488907	-0.0166691	0.0188676	0.0336429	0.0341496	-0.00290035	-0.0140421	-0.00420379	-0.000605931	-0.027581	-0.0703893	-0.0801986	-0.116262	-0.0825086	-0.0532883	-0.000451929	0.0465993	0.0728065	0.107303	0.117354	0.101366	0.158437	0.227495	0.293251	0.312285
		36.707	-0.0171816	-0.0167784	-0.0126559	-0.0155639	-0.0150556	-0.00515853	-0.00838424	-0.00876058	-0.00107019	-0.00234826	0.00315744	-0.010828	-0.0159207	-0.00781241	0.00696231	0.0116934	0.00582354	0.00127334	-0.000982218	-0.000713408	0.000266523	0.013013	0.025994	0.0246304	0.0154274	0.00276156	0.00515396	0.00528104	0.00881221	0.0197723	0.0123141	0.00396876	-0.00156627	0.00211642	0.00160813	0.029596	0.0281029	0.0487475	0.0636664	0.0647221	0.0709633	0.0779695	0.0913048	0.0980788	0.0914002	0.0802201	0.0862732
		34.111	-0.013869	-0.0101133	-0.00569959	-0.00201075	0.0140381	0.0242259	0.0235792	0.024924	0.0167858	0.0178719	0.0128494	0.0119462	0.0173924	0.0169798	0.0089264	0.0166609	0.01549	0.0106147	0.00566131	-0.00301436	-0.0113934	-0.0104143	-0.0143641	-0.0154725	-0.0182849	-0.0293336	-0.022819	-0.0149551	-0.0184209	-0.0214229	-0.0263584	-0.0289567	-0.0311178	-0.0234635	-0.020049	0.000518354	0.0116116	0.0340011	0.0416821	0.0473469	0.0551305	0.0636166	0.0665383	0.0754704	0.0791637	0.0675396	0.0594238
		35.499	-0.0047482	-0.00357261	-0.00246729	-0.00232676	0.00425652	0.00616178	0.000445999	-0.00101605	-0.00418878	-0.00505358	-0.00941271	-0.0101316	-0.0129205	-0.0117098	-0.00448876	-0.00313751	-0.00206192	-0.00222407	0.0166339	0.0197445	0.0139071	0.00842106	0.00731845	0.0100615	0.00186751	0.000637876	-7.82852e-05	-0.00102146	-0.00528059	-0.00146467	-0.0038888	-0.00719396	-0.0105478	-0.0120801	-0.0155068	-0.00744799	0.00761032	0.0175204	0.0238199	0.0354055	0.0397727	0.0435049	0.0417104	0.0385566	0.0398889	0.0463425	0.0384026
	5	33.995	-0.00816314	-0.00652001	-0.00834925	-0.00759992	-0.00555029	-0.00353494	-0.00770767	-0.00331945	-0.00156122	-0.000388251	-0.00236932	0.00240336	0.00453381	0.00513621	0.00358368	0.00508478	0.00606919	0.00179606	0.00106633	0.00327513	0.00423505	0.000130891	0.00311841	0.00481542	0.00503091	0.00338288	0.00451666	0.00466604	0.00408813	-0.000564563	-0.00272929	-0.0020975	-0.0104528	-0.0176399	-0.00735994	-0.000618437	0.000522697	0.0100191	0.0138318	0.0207448	0.0326189	0.040602	0.034911	0.0413121	0.0416647	0.0475271	0.0473386
	6	36.251	-0.0263511	-0.0254888	-0.0254412	-0.0166131	0.006262	0.0412886	0.0728546	0.0882148	0.0618986	0.0435425	0.0662049	0.0394491	0.027698	0.0136033	0.00808753	0.0122118	0.01705	0.000270235	-0.0185226	-0.0014013	-0.0325417	-0.0105821	-0.0269503	-0.0660312	-0.0422797	-0.0485655	-0.0349972	-0.0397962	-0.0381751	-0.0314385	-0.0134604	-0.0105681	0.0137125	0.0111674	-0.00480597	-0.0584939	-0.0649168	-0.0402106	-0.0480111	-0.0392278	-0.0120185	0.00429368	0.0557249	0.0895503	0.0996523	0.0986192	0.105725
		36.322	0.00344893	-0.00236882	-0.00370312	0.00068002	-0.00124912	-0.00107184	-0.00527303	-0.0073398	-0.00629709	-0.0107479	-0.00652102	-0.00139375	-0.00231517	-0.000129427	0.000733672	0.00928768	-0.000836235	-0.00884206	-0.00212855	-0.00790198	-0.00882573	-0.00820057	0.0041744	0.000640364	0.00963292	0.0157703	0.0121429	0.0145759	0.00520779	0.00647445	-0.0148348	-0.0161597	-0.00775502	-0.0205452	-0.0177413	0.00705062	0.010594	-0.00850149	-0.000488663	-0.00439827	-0.00025306	-0.00425597	-0.0018393	0.00135884	0.00566033	0.016582	0.0115644
		34.094	-0.00685717	0.00496588	-0.0108378	-0.0124574	-0.0206138	-0.0133675	-0.00782792	-0.0164433	-0.00551184	0.0102153	0.00846637	-0.000515666	-0.00902816	-0.0120486	-0.00199816	0.00171336	-0.0100464	-0.0179232	-0.00580729	-0.00148641	0.000209755	0.0189547	0.0412713	0.0365468	0.0244679	0.0203264	0.0137105	0.0111491	-0.000312548	-0.012832	-0.0260822	-0.0301551	-0.029464	-0.027934	-0.0277467	-0.0394906	-0.0118454	-0.00502647	0.0146153	0.0274144	0.0382192	0.0476022	0.0570142	0.0600425	0.0596284	0.060061	0.0621133
		42.247	0.00538436	0.000967617	0.0143288	0.0253624	0.015999	0.0100147	0.00221329	0.00146145	-0.00124075	-0.0083819	-0.00945002	-0.00481133	-0.00157922	-0.0107512	-0.0195347	-0.00595713	-0.00581841	-0.00705022	-0.00591274	-0.0102296	-0.00785755	-0.0113699	-0.0213769	-0.00778264	0.000604179	0.011266	0.0195917	0.00757609	0.0108664	0.0122259	0.00124228	-0.00888405	-0.0135366	-0.00828757	0.0157798	0.0168562	0.0265664	0.0158991	0.00559798	0.0229348	0.0188121	0.0185763	-0.014946	-0.00595713	-0.00480578	0.00653848	0.0252791
		33.415	0.00558651	0.00409305	0.0071905	-0.00222854	0.0119216	5.74809e-05	-0.00590827	-0.0126854	-0.00622367	-0.0118821	-0.0134645	-0.00759852	-0.00947747	-0.0115263	-0.00592983	-0.00970661	-0.00747451	-0.0065256	0.00148624	0.0133827	0.0122478	0.00691014	0.00454055	0.00547868	0.00490179	0.0167389	0.00874866	0.00608523	0.00618228	0.00195261	-0.00687335	-0.0079274	-0.0138797	-0.0149607	-0.00170825	-0.000681161	-0.0120358	-0.0133082	-0.00718606	0.00676457	0.0209605	0.0187392	0.0161755	0.0133881	0.0174991	0.022152	0.0269748
CNO	1	36.537	0.000581821	0.000508463	-0.000247132	-0.000719073	-0.000587027	-0.00162872	-0.00314969	-0.00207132	-0.00173387	0.000836132	0.00304912	0.00138388	9.6234e-06	7.80915e-05	-0.00100762	0.000153896	-0.000557684	-0.000467208	-0.000557684	-0.00225961	-0.00161894	-0.000765534	0.000439994	-0.000151766	0.000366636	0.00353573	0.00270189	0.00104154	0.00214681	0.00141077	-0.000721518	-0.000572356	-0.00122769	-0.000186	-0.00213245	-0.00203708	-0.00240143	-0.0015089	0.00245736	0.00106354	0.00304178	0.00405169	0.0079935	0.0120576	0.0164004	0.0226579	0.0277294
		35.281	0.0231598	0.00459807	0.0037211	-0.00160725	-0.000153844	-0.00377998	-0.012934	-0.0132542	-0.0113648	-0.00175013	0.0274807	0.0123381	-0.00711051	-0.0190605	-0.0156585	-0.0190309	-0.0177845	-0.00516688	0.00154837	0.000801958	-0.00685185	-0.00900733	-0.00501415	0.00144737	-0.00805892	-0.00576549	0.0049257	0.0219577	0.0142768	0.0173733	0.0297248	0.00167647	0.000708349	-0.0100494	-0.0158359	-0.0152176	0.0041448	0.0162598	0.0306363	0.0537677	0.0807592	0.0879696	0.0977494	0.106297	0.0936158	0.0905734	0.084548
	2	40.895	-0.00453174	-0.00149762	-0.00105863	-0.000171484	0.000297238	-0.00100375	-0.00277346	-0.00152506	-0.000747669	-0.000656211	-4.34425e-05	-0.000756815	-0.00101976	-0.00027666	0.000123468	-0.00150677	0.000731664	-0.000404702	0.000784252	0.00034754	-0.00141303	0.000306384	0.00114551	0.00138787	0.00160737	0.00121868	0.00135129	0.0021767	0.00221328	0.00280776	0.00288779	0.00300439	0.00175599	0.00418649	0.00307756	0.00415219	0.00356229	0.00443571	0.00380465	0.00562238	0.00695995	0.00548748	0.00859934	0.0137896	0.010241	0.0131059	0.0125366
		36.024	0.00209615	-0.0022939	0.00443039	0.00256021	-0.00191801	0.00211007	0.00320062	-0.00102468	0.00481788	0.00384335	7.85916e-06	-0.000727682	-0.00521286	-0.00512933	-0.00469543	-0.00463974	-0.00932447	-0.00952866	-0.00307817	0.00151839	0.00212167	0.00797584	0.00599197	0.00271567	0.00262518	0.00317046	0.0057785	-0.00219877	-0.00541705	-0.00491354	-0.0114592	-0.0170558	-0.0127562	-0.00996256	-0.00294127	-0.00304104	0.0133033	0.0373766	0.033678	0.0352976	0.0287195	0.0344577	0.0361654	0.0425973	0.0513055	0.053482	0.0520387
	3	39.051	0.00521648	0.00245893	0.0251543	0.0389742	0.0299952	0.0206488	0.0138173	0.00965782	0.00615469	0.00141013	-0.0012404	-0.00633812	-0.00783641	-0.00901006	-0.00652006	-0.0113859	-0.0145608	-0.0160449	-0.0134978	-0.00777219	-0.00742616	-0.00693387	-0.00734768	-0.00749394	-0.00422269	-0.0115964	-0.0102551	-0.00888877	-0.00723353	0.00393581	0.00144938	0.000593214	-0.00528219	0.00089287	-0.000430612	-0.00190749	0.000714503	0.0166676	0.0346649	0.0483064	0.0629039	0.0938399	0.116806	0.135835	0.162076	0.188171	0.22037
		35.055	0.002468	0.00503121	0.00581814	0.00423808	0.00408524	0.00530385	0.00221395	0.00030342	0.00352757	0.00649767	0.00468835	-0.000101406	-0.00362092	-0.00091519	0.00211894	0.00703056	0.00247833	0.00275716	-0.00153069	-0.0053249	-0.0019004	0.00371346	0.00477923	0.000980884	-0.00369114	-0.0052175	-0.0101518	-0.0115646	-0.00864406	-0.0116059	-0.00787779	-0.000805721	0.00406872	0.00245148	0.0116138	0.0206439	0.0334909	0.0369278	0.0421203	0.0513735	0.061269	0.0702103	0.0796989	0.0883263	0.0891504	0.0897101	0.093998
	4	34.221	-0.00915542	-0.0100293	-0.00907375	-0.00200886	-0.0139579	-0.0146576	-0.0178075	-0.0169962	-0.00891312	-0.00533031	0.0162292	0.0310369	0.0196405	0.0159025	0.00480012	0.0169261	0.0177211	0.0129758	0.00754985	0.00631383	0.000367889	-0.00245262	-0.00609261	0.00239888	-0.0013364	0.00136705	0.0125511	0.00797728	-0.0168329	-0.0160161	0.00436997	-0.000388966	0.00373018	0.0179199	0.0471296	0.0635572	0.0975667	0.0976402	0.121457	0.167391	0.189791	0.19549	0.227533	0.212562	0.193184	0.189277	0.158455
		33.509	0.0186054	0.0261136	0.0144445	0.0107824	0.0145866	0.00972877	0.00507369	0.00383824	0.00464944	0.00703642	-0.00465139	-0.0102505	-0.00485653	-0.00280055	-0.0123858	-0.00822487	-0.0119778	-0.013162	-0.00860949	-0.00134832	-0.00655352	-0.000150164	-0.00551155	-0.00480757	-0.011775	-0.00104295	-0.00150216	-0.00635072	-0.00998014	-0.0136399	-0.0240899	-0.0259081	-0.0215048	-0.00831578	0.0276008	0.0516338	0.0770514	0.121833	0.132383	0.137894	0.147174	0.159682	0.159684	0.179309	0.164757	0.145153	0.126833
		36.418	0.0517713	0.0549686	0.0458455	0.0416819	0.0395856	0.0341373	0.0332898	0.0158127	0.0085932	0.00145215	-0.0018056	-0.0074041	-0.0157693	-0.0093592	-0.0158074	-0.0068929	-0.0249709	-0.0320379	-0.0262376	-0.0225629	-0.0189912	-0.0117425	-0.0096148	-0.0165182	-0.0173209	-0.0229037	-0.0301972	-0.0149689	-0.00650502	-0.00826955	-0.00725836	-0.0081978	-0.0134219	-0.00914396	-0.0130878	-0.0109287	0.00757081	0.015158	0.0369668	0.042294	0.0314849	0.0441482	0.0676947	0.0799634	0.0942567	0.0808019	0.0876784
		35.775	0.00180152	-0.00447311	-0.00972373	-0.00971605	-0.0179337	-0.0159062	-0.0107733	-0.000740592	0.00230072	0.00356026	0.00152247	-0.000538349	-0.00560209	-0.00897108	0.00195256	0.0121824	0.00617661	0.0130452	0.0110714	0.0108743	0.00801983	0.00937664	-0.000228586	0.00339897	0.0108666	0.00558524	-0.00120396	-0.00835156	-0.0069717	-0.0109756	-0.019713	-0.0278846	-0.0346149	-0.0323109	-0.0262948	-0.0205783	-0.00934997	0.00485563	0.00981441	0.0269308	0.026662	0.034511	0.0419351	0.0553932	0.0572697	0.0480152	0.0431562
	5	35.228	-0.00265944	-0.00242352	-0.00288939	-0.00368975	-0.0029312	-0.00304767	-0.00302976	-0.00283564	-0.00473201	-0.00246831	-0.00153058	-0.00358523	-0.00215474	-0.000804884	0.00119003	0.00606385	0.00593543	0.00124379	0.000544971	0.00344477	0.00457363	0.00422123	0.000491215	0.00325065	-0.000413665	0.000461351	0.000595739	0.00028814	0.000977999	0.0046244	0.00128859	-0.001659	-0.00173963	0.000326963	-0.00291329	9.10372e-05	0.00453779	0.0046901	0.00240251	0.00612656	0.0140077	0.0200014	0.0278437	0.027563	0.0318903	0.0318485	0.0346407
		37.439	-0.00564188	-0.00199238	-0.00116945	-0.00215654	0.00046167	-0.00216286	-0.00158407	-0.000504375	0.00267579	0.000348018	-0.000980031	0.00309883	0.005294	0.00027225	-0.00309312	-0.000868483	0.000762639	0.00158346	0.00441846	0.00224854	0.00257687	0.00278944	0.000167016	-0.00066433	-0.00445906	-0.000773773	-0.000651702	-0.00130205	0.00197914	0.000369065	-0.00104107	5.33637e-05	-0.00134204	0.00357659	0.00904032	0.00520771	0.0175811	0.0139821	0.00230536	0.0157079	0.0219904	0.0255915	0.0297524	0.0332798	0.0384889	0.0413597	0.0532995
		48.791	-0.0214037	-0.0245142	-0.012007	-0.011771	-0.0110563	-0.00374069	-0.0172436	-0.0237973	-0.0117777	-0.0093347	-0.00752547	-0.0103461	-0.00501952	0.00273882	0.00784062	0.00913293	0.00361534	0.00503126	0.0119985	0.00577069	0.00968806	0.00541109	0.0221549	0.0121895	0.00985213	0.0141785	0.0262543	0.016235	0.0116861	0.013529	0.0392785	0.0400944	0.0310662	0.029702	0.0326259	0.0411125	0.0438769	0.0496507	0.0530354	0.0395257	0.0308122	0.0439016	0.0250047	0.0202917	0.00585384	0.021193	0.0233079
	6	36.72	0.0581404	0.052989	0.0510655	0.054024	0.0592688	0.0870921	0.0621761	0.048662	0.0385607	0.0348511	0.000194657	-0.0115095	-0.0203046	-0.0279584	-0.0258902	-0.0288835	-0.0371345	-0.0244411	-0.0153859	-0.0180513	-0.0181777	-0.0256264	-0.0462429	-0.0558074	-0.0561554	-0.0524494	-0.0394226	-0.043418	-0.03895	-0.0371712	-0.0578811	-0.0712597	-0.0838139	-0.111113	-0.14213	-0.172129	-0.163307	-0.167905	-0.184528	-0.187083	-0.175392	-0.173183	-0.171202	-0.168958	-0.156787	-0.164578	-0.158934
		36.597	-0.0153466	-0.00718171	-0.00832402	-0.00859635	-0.00648283	-0.0187205	-0.0197327	-0.0173613	-0.0194628	-0.0202195	-0.0156985	-0.0134162	-0.0156768	-0.0123077	-0.00958925	-0.00742271	-0.000804999	0.00854317	0.0025641	0.00964934	0.0194916	0.0219063	0.0207351	0.0194675	0.019735	0.0121123	0.0219642	0.031134	0.0233426	0.0214966	0.0141993	0.0139631	0.000284296	-0.0166865	0.00197608	0.0100928	0.0389012	0.0205592	0.0577301	0.0487097	0.0625066	0.0755179	0.0853288	0.10277	0.109775	0.123565	0.1178
		37.203	-0.0113667	-0.00900916	-0.00587931	0.000618379	0.00748204	0.0154953	0.0128481	0.00904921	0.00616409	0.00362923	-0.00491611	-0.00150785	-0.00148989	-0.00572439	0.00473613	0.000176069	0.00153219	-0.00497224	-0.012597	-0.00050199	0.00103824	0.00096639	-0.00131027	-0.0032726	-0.00573786	0.00441731	0.00301404	-0.00344099	0.00773126	-0.00551783	-0.0146402	-0.0231855	-0.0256508	-0.0195056	-0.0114048	-0.0187288	0.00157036	0.0140853	3.18676e-06	0.0318967	0.0479321	0.0543939	0.0787187	0.0937303	0.108838	0.122813	0.143541
		34.094	-0.00685717	0.00496588	-0.0108378	-0.0124574	-0.0206138	-0.0133675	-0.00782792	-0.0164433	-0.00551184	0.0102153	0.00846637	-0.000515666	-0.00902816	-0.0120486	-0.00199816	0.00171336	-0.0100464	-0.0179232	-0.00580729	-0.00148641	0.000209755	0.0189547	0.0412713	0.0365468	0.0244679	0.0203264	0.0137105	0.0111491	-0.000312548	-0.012832	-0.0260822	-0.0301551	-0.029464	-0.027934	-0.0277467	-0.0394906	-0.0118454	-0.00502647	0.0146153	0.0274144	0.0382192	0.0476022	0.0570142	0.0600425	0.0596284	0.060061	0.0621133
		33.813	0.0040669	0.0126331	-0.0102003	0.00648543	0.0013555	-0.000711603	-0.000560292	0.00689788	-0.00104107	-0.00209537	-0.0156743	-0.00322288	0.00690032	0.00206569	-0.0134461	-0.00678845	0.0112322	0.0204134	0.0127112	-0.000828747	0.0118863	0.00168985	-0.00815757	-0.00932413	-0.0106347	0.014051	0.011691	0.0114567	-0.00650047	-0.016858	-0.0294924	-0.0410555	-0.0498413	-0.0438426	-0.0237353	-0.0163967	-0.013883	-0.000560292	0.0167429	0.0236714	0.0276348	0.0373968	0.028633	0.0328843	0.0331577	0.019486	0.0197422
		36.231	0.00525645	0.00671801	0.00970253	0.0111816	0.00664786	-0.00631915	-0.013016	-0.012104	-0.00725747	-0.00597129	-0.00581052	-0.00820456	-0.0065793	0.00604277	0.00561307	0.00408135	-0.00206307	-0.00937966	0.00543183	0.0118803	0.00830235	0.0056423	0.00882267	0.00106468	-0.000353039	0.00308748	0.00217839	-0.00103413	0.00128684	-0.012218	-0.0126302	-0.0150184	-0.00423495	-0.00195199	0.00203224	-0.00777486	0.00139792	0.0117487	0.0293577	0.0416991	0.0534881	0.0562621	0.0629006	0.0665282	0.0680219	0.0773642	0.0697348
[truncated: 314 more columns]
