# Supplementary material for: Neural basis for regulation of vasopressin secretion by anticipated disturbances in osmolality
Source: eLife. 2021 Sep 29;10:e66609. doi: 10.7554/eLife.66609 (PMC8601670; doi:10.7554/eLife.66609)
Supplement: Figure 7—figure supplement 4—source data 1. [file elife-66609-fig7-figsupp4-data1.xlsx]

## Sheet: Sheet1
latency
AgRP			POMC			ARC/VMH/DMH			DMH			VMH
Saline	CNO		Saline	CNO		Saline	CNO		Saline	CNO		Saline	CNO
5.219	4.896		9.7893	6.1675		5.1985	5.4245		5.8826	6.919		6.0882	7.2806
5.1484	5.7718		6.9306	5.401		5.396	7.0685		8.415	7.5356		6.632	7.6167
4.9616	6.364		6.4354	4.1574		6.6725	5.0123		6.7008	9.3656		5.3034	7.241
6.3423	5.1198		7.087	7.6112		5.3563	3.317		10.5783	6.7178		4.5853	6.6547
			3.7117	4.3513		4.1598	5.088		8.6415	6.3244
			6.0589	9.8418					6.0738	4.6448
			4.9985	9.8418					5.4387	6.9463
			7.578	9.8418
