# Supplementary material for: Neural basis for regulation of vasopressin secretion by anticipated disturbances in osmolality
Source: eLife. 2021 Sep 29;10:e66609. doi: 10.7554/eLife.66609 (PMC8601670; doi:10.7554/eLife.66609)
Supplement: Figure 7—source data 1. [file elife-66609-fig7-data1.xlsx]

## Sheet: Figure 7e
Treatment	Mouse #	dF/F
		time (s), HDZ injection at 120s
		1	2	3	4	5	6	7	8	9	10	11	12	13	14	15	16	17	18	19	20	21	22	23	24	25	26	27	28	29	30	31	32	33	34	35	36	37	38	39	40	41	42	43	44	45	46	47	48
	1	0.000314335	0.00196591	0.000528707	-0.0006126	-0.000802818	-0.000515981	0.000350567	0.000492475	8.7885e-05	3.3537e-05	0.0019176	0.00273584	0.0020263	0.00178173	0.00172436	0.00164284	0.000398876	-0.00105946	-0.00181127	0.000398876	0.000447185	-0.000621658	-0.00164219	-0.00261442	-0.000999074	-0.00074545	-0.000682044	-0.00173881	0.000118078	0.00112653	-0.00126176	-0.000766586	-0.000814895	5.46723e-05	-8.42169e-05	0.000809505	0.00104501	0.00110842	-0.000986997	-0.00232758	-0.0015818	-0.00201357	-0.00120439	-0.00218567	-0.000174797	-0.00206792	-0.00177202	-0.00100813
	2	0.00621514	0.00513231	0.00430139	0.00554213	0.00592939	0.00311329	0.00336895	0.0052451	0.00419987	0.00357574	0.0053391	0.00397052	0.00664375	0.00351183	0.00322608	0.000379897	0.00324488	0.00391789	0.00357198	0.00251923	0.00238764	0.00297417	0.000218225	-0.00238357	-0.0025114	-0.00521847	-0.00561701	-0.00622986	-0.00523351	-0.00324081	0.00155296	-1.86437e-05	0.00175599	-0.000951079	-0.00414692	-0.00416948	-0.00215422	-0.00139474	-0.00245877	-0.00391382	-0.00480113	-0.00593284	-0.00437627	-0.00599676	-0.00753452	-0.00569221	-0.00365815	-0.00537263
	3	0.000848799	0.00152563	0.00291798	5.65761e-06	0.00142507	0.00452304	0.00407053	0.00523855	0.00626347	0.00222567	0.000852667	-0.00303043	0.00291798	0.000303464	-0.00114303	-0.000992189	-0.00166129	-0.00452719	-0.00107341	-0.000431384	-4.07538e-05	-0.00185467	-0.00330889	-0.00384649	-0.00301495	-0.00374207	-0.00452333	-0.00306137	-0.00344813	-0.00387743	-0.00362991	-0.00366085	-0.00393158	-0.0041559	-0.00472831	-0.00250443	-0.00366471	-0.00204031	0.000233847	-0.000203194	-0.00104634	-0.0013248	-0.00247736	-0.00198617	-0.00284865	-0.00234199	-0.00459294	-0.00945454
	4	0.00168117	0.000577162	0.000256513	0.00158376	0.00278924	0.00231841	0.000650221	0.00342242	0.00228188	0.00515555	0.00397848	0.00195717	0.00479025	0.0039176	0.000431043	0.000418867	0.000719222	0.000930282	-3.16657e-05	0.00228188	0.000329572	0.00160405	0.00176641	0.00127934	0.00263906	0.00303277	0.00499319	0.00454266	0.00389324	-0.000555258	-0.00149691	0.000114453	0.00454672	0.00103987	0.0012834	-0.00404993	-0.00496723	-0.00355475	-0.00353445	-0.00289316	-0.00338022	-0.00345328	-0.00454105	-0.00493882	-0.00348575	0.00217635	0.00118193	-0.00137109
	5	0.00837199	0.00585767	0.00433487	0.00591636	0.0070407	0.00640748	0.00480746	0.00492175	0.00711174	0.00445842	0.0052677	0.00510708	0.00322907	0.00497117	0.00611404	0.00423912	0.0035503	0.00323833	0.00226535	0.00282443	-0.00138258	-0.00477412	-0.00908306	-0.0097904	-0.0101116	-0.0103001	-0.00729153	-0.00806374	-0.0103711	-0.00897495	-0.00904908	0.000124779	0.00516268	0.00359664	-0.00194475	0.00650324	0.0042978	-0.00672936	0.0025557	-0.00191386	-0.000934694	-0.00146906	0.00178349	0.0021387	0.000572661	-0.00123122	0.000436752	0.000649882
	6	-0.00936615	-0.00891634	-0.00726068	-0.00817305	-0.00882383	-0.00804225	-0.00919388	-0.010304	-0.0110537	-0.0118449	-0.0133857	-0.0161387	-0.0154529	-0.0151785	-0.015925	-0.0166906	-0.0169139	-0.0152519	-0.0145628	-0.0137844	-0.0118034	-0.0104827	-0.0107124	-0.0128816	-0.0128019	-0.0142247	-0.0132102	-0.0131369	-0.0126201	-0.0111367	-0.0119948	-0.0141003	-0.0111335	-0.0121798	-0.0122181	-0.0134559	-0.0130826	-0.0124095	-0.0130348	-0.0120107	-0.013475	-0.0125786	-0.0120076	-0.00959265	-0.0100361	-0.00598783	-0.00413757	-0.00393021
	7	-0.00949307	-0.00706675	-0.00880904	-0.00906977	-0.00940412	-0.00950228	-0.00730601	-0.00869248	-0.00890413	-0.00933357	-0.00942252	-0.00406681	6.7179e-06	0.000430022	-0.00220489	-0.00125092	-5.55177e-06	0.000153954	0.00395755	0.0034821	0.00476428	0.00596058	0.00627652	0.00627345	0.00663541	0.00629492	0.00465999	0.000831853	-0.00437355	-0.00491955	-0.00644713	-0.00358523	-0.0042938	0.0011478	-0.00117424	-0.000527013	-0.00105768	-0.00240427	-0.00205459	-0.00288279	-0.00213434	0.000583392	-0.00189815	-0.000701856	-0.00179692	-0.000465664	-0.00226317	0.00381032
	8	0.00247743	0.00691699	0.00419089	0.00259784	0.00216253	0.00130425	-0.00312296	0.0106249	0.0190934	0.0180066	0.0129681	0.00388216	0.00509239	0.00392847	0.00129499	-0.000159137	-0.00187569	-0.00273396	-0.00198374	-0.00278336	-0.00314766	-0.00395654	0.000415104	0.0025577	0.00199272	0.00573146	0.00895153	0.0131163	0.00661752	0.00375867	0.00793889	0.00545669	0.00278925	0.0054783	0.00432673	0.0050399	-0.00435171	-0.00464192	-0.00487347	-0.00533348	-0.0075934	-0.00644183	-0.00777555	-0.00779716	-0.00650357	-0.00135702	-0.00216281	-0.00441963
	9	0.00167131	0.00136865	0.00102133	0.000540057	-0.00217643	0.00187225	0.00399582	0.00388667	0.00249741	0.00168123	-0.000998043	-2.30859e-05	0.00250486	0.00309033	0.000475556	-0.00150909	-0.00015953	0.00139594	0.000244841	-9.25485e-05	8.85505e-05	-0.000365437	-0.000241397	-0.00031334	-0.00175221	-0.00225333	-0.00140241	-0.000469631	0.00120491	-0.000762366	0.00079558	0.00420669	0.00486658	0.00391395	0.00082535	-0.000953388	-0.00222852	-0.00325806	-0.0041313	-0.00332752	-0.00311913	-0.00165794	-0.000697865	-0.00146195	-0.00298021	-0.00295292	-0.00197052	-0.00195563
	1	-0.000541587	0.00104621	-0.00119726	-0.000750694	-0.00100588	-0.000616015	0.00134392	0.00045433	0.000822925	0.00245325	0.0025773	0.00267299	0.00297779	0.001872	0.00351296	0.0016948	0.00101077	0.00267654	0.00640856	0.00474988	0.00502279	0.00388156	0.00271198	0.00241427	0.00103912	0.000861911	0.000486227	0.000652804	0.000656348	-0.000835755	0.000879632	0.00168416	0.000514581	0.000486227	0.0012943	0.00249933	0.000950516	0.000383446	-0.000810945	0.00128721	0.00299551	0.00230085	0.0026092	0.00282894	0.00238946	0.0024249	0.00162391	0.00239654
	2	0.00660756	0.00332039	0.0077417	0.0104895	0.00954434	0.00773709	0.00707781	0.0040811	-0.00205526	0.000125432	0.00857156	0.00369383	0.00476804	0.00228307	0.00107516	0.00311293	0.00168833	8.85489e-05	-0.00058917	-0.00242408	0.00312676	0.000554192	-0.00128994	-0.00319401	-0.00255317	-0.0031479	-0.00689149	-0.00670708	-0.00766603	-0.00967613	-0.00929809	-0.00849128	-0.00998503	-0.00969458	-0.0115341	-0.0119997	-0.0111238	-0.00935802	-0.00821927	-0.00672091	-0.0070713	-0.00646273	-0.0065365	-0.00697909	-0.00794726	-0.0085881	-0.0116447	-0.00913673
	3	-0.000991582	-8.7699e-05	-0.000684262	-0.000778265	-0.00226425	-0.00368877	-0.00350076	-0.00222809	-0.00503736	-0.00553992	-0.00572793	-0.00391293	-0.00181231	-0.00435041	-0.000897578	-0.00032994	0.00126451	0.000639023	0.000216006	0.000606483	0.000208774	-0.00302713	-0.00019978	0.000252161	-0.000366095	0.00196954	-0.000550487	-0.000416712	0.000122002	0.000765566	-0.00478066	-0.0025788	-0.000691493	0.00258779	-0.00202562	-0.00026486	0.00221901	0.00368691	0.00499212	0.00723737	0.00378453	0.00558868	0.00133682	0.00487642	0.00447149	0.00580562	0.00715782	0.00655042
	4	0.00263823	0.00400507	0.00411471	0.00571179	0.00354824	0.0043486	0.0026894	0.00290136	0.0027698	0.00267478	0.00328876	0.00297811	0.00431937	0.00299639	0.00419876	0.00424993	0.00268574	0.00222526	0.000942475	-0.000428016	-0.00103834	-6.98611e-05	-0.000936012	-0.00536544	-0.00306301	-0.00523022	-0.0042727	-0.00326767	-0.00608175	-0.00624256	-0.00597577	-0.00801871	-0.00647645	-0.0033627	-0.00365507	-0.00363679	-0.00532889	-0.00610733	-0.00644722	-0.00391089	-0.00485745	-0.00571629	-0.00440061	-0.00265735	-0.00555183	-0.00167425	-0.000797135	-0.00115895
	5	0.00429285	0.00419623	0.00532471	0.00417552	0.00383732	0.00364752	0.00346116	0.000617531	0.00162868	0.00204625	0.00109032	0.00160797	-7.95728e-05	0.000538158	0.00210146	0.0015355	0.00123526	0.00234649	0.000803885	0.000379411	0.00104891	0.00146648	0.00162523	0.00114899	0.00061408	-0.000314241	0.00159072	0.000572668	0.0018806	0.00134224	0.000251724	0.000244822	0.00100059	0.000558864	0.000862552	0.00144922	0.000144743	0.00109377	0.000748669	0.00113173	0.00305049	0.00118005	0.000676198	0.00235339	0.00119385	0.00152515	0.0011973	0.000817689
	6	-0.00113665	-0.000601414	-0.00526513	0.00223178	0.00116487	-0.00363443	-0.00309919	0.00268852	0.00230315	0.000693864	0.00143606	0.00194989	-0.000323089	0.000761661	5.15775e-05	0.000290651	0.00150029	0.000354879	-0.00085476	0.00127549	0.000308492	0.00274204	0.00134685	0.00257434	0.00170725	0.000130079	0.00173223	0.000651045	0.000294219	-0.00159696	-9.08284e-06	0.00122197	-0.00204299	0.00142536	0.000651045	0.000697432	-0.000369477	0.000890118	5.8714e-05	-0.00102247	-0.000572867	-0.000101858	-0.000176791	0.00014792	-0.0016148	0.000633203	-0.000647801	-0.00226065
	7	6.35913e-05	0.00116135	0.000254506	0.00185001	-0.00100349	-0.00126599	0.000646563	0.00786041	-0.00291604	-0.00194101	0.00032269	-0.00350924	-0.00448427	-0.0039013	-0.00154896	-0.0034206	-0.00443313	-0.0030865	-0.00482519	-0.00577976	-0.00363879	-0.00136827	-0.00142282	-0.00309332	-0.00156259	-0.00228534	-0.00154214	-0.00568431	-0.00331492	-0.00331151	-0.00127963	0.00788428	-0.00169555	-0.00439563	-0.00594681	-0.0037547	-0.00293991	-0.000679612	-0.00119781	-0.00039665	0.00220456	0.00175455	0.00238525	0.00215683	0.00340119	0.000731793	-0.00247285	0.00324778
	8	-0.0115985	-0.0101961	-0.00882654	-0.0104419	-0.00710635	-0.00804344	-0.00933112	-0.00807293	-0.00685405	-0.00422954	-0.00546152	-0.00594645	-0.00797791	-0.0068475	-0.00455392	-0.00325968	-0.00438353	-0.00553033	-0.00783702	-0.00896743	-0.00799429	-0.00732588	-0.00416073	-0.00282062	-0.00109716	0.000754094	0.00184518	0.00349984	0.00646184	0.00623248	0.00474165	0.00739893	0.00781506	0.0121303	0.0223924	0.0204789	0.0229789	0.0208819	0.0149776	0.00770693	0.0108819	0.0123957	0.0183885	0.0201185	0.0149219	0.0138144	0.0112161	0.0127921
	9	0.00180061	0.00144669	0.000567345	-0.00185562	0.00126973	0.00240226	0.00187411	0.00309376	0.000877702	0.00269629	0.000205262	-2.06995e-05	0.000766083	0.00198573	0.000232487	0.00116356	0.000118144	0.0008532	3.10267e-05	0.000325049	0.00286235	0.00203201	0.00129696	0.00110366	0.00118534	-0.000418174	-0.000641413	-0.000802037	-0.00186651	-0.000535239	0.000455726	-0.00167866	-0.00365514	-0.00191551	-0.00397911	-0.00629046	-0.00451271	-0.00316238	-0.00447187	-0.00199991	-0.00114506	-0.00392194	-0.00413701	-0.00322228	-0.00413157	-0.00137919	-0.0014527	-0.000464456
[truncated: 1,273 more columns]

## Sheet: Figure 7f
Treatment	Mouse#	latency to feeding onset (s)	dF/F
			time (s), food presented at 30s
			1	2	3	4	5	6	7	8	9	10	11	12	13	14	15	16	17	18	19	20	21	22	23	24	25	26	27	28	29	30	31	32	33	34	35	36	37	38	39	40	41	42	43	44	45	46	47
Saline	1	42.418	-0.00357146	0.00654375	-0.00237775	0.00116984	0.0101651	0.0097225	0.00985663	-0.00147465	0.00581054	-1.26913e-05	-0.00132711	0.00674941	-0.00280248	0.00722555	0.00381656	0.00221824	-0.00238669	0.000883706	-0.00186361	-0.00245375	0.00493873	0.0239084	-0.0215508	-0.0329939	-0.015855	-0.0133715	-0.0129222	0.00194329	0.00599832	-0.00128464	0.0152976	0.0289917	0.016612	0.0103015	-0.00616006	-0.0259076	-0.021723	-0.0102263	0.00151856	0.0221357	0.00557359	0.0363842	0.0380496	0.0496737	0.0705725	0.084555	0.0844409
		36.714	-0.00540676	-0.00944303	-0.0107248	-0.010738	-0.000630123	-0.00455228	-0.00456555	-0.00680261	-0.00941118	0.00926283	0.00267903	0.00776881	0.00902135	0.0147745	0.0214194	0.00185904	0.0175928	0.0126994	-0.00198085	-0.0121445	-0.00487603	-0.0124948	0.000776333	-0.00371902	0.00673652	0.022104	0.00717969	-0.00053459	-0.00389151	-0.0146416	-0.0173165	-0.0141003	0.00842161	0.0055689	0.00548398	0.0182854	0.028526	0.0601128	0.0528921	0.0745728	0.0895131	0.111823	0.104509	0.114543	0.123645	0.140509	0.147783
		36.884	0.01243	0.00923047	-0.00199076	-0.00717748	-0.0040842	0.012305	-0.00525486	-0.0174134	-0.00958754	-0.00676921	-0.0104978	-0.00174497	0.000992123	-0.00332598	-0.00498615	-0.00309476	-0.000686792	0.0102449	0.0106198	0.00491653	0.00152121	0.000104756	-0.000201448	-0.00432166	0.0116384	0.00442286	0.00403125	-0.00127837	-0.00379674	-0.010879	0.00103795	0.00706829	0.00686416	0.00728909	0.00307306	0.0126133	0.0134465	0.0167231	0.029367	0.0378262	0.0419276	0.0428275	0.0526781	0.0532989	0.0565671	0.0517616	0.0472289
		347.664	0.0128429	0.0073106	0.00803212	0.00571178	0.00889917	0.0177562	0.00569538	-0.000902824	0.000634503	-0.00816311	-0.0042091	-0.0103482	-0.008694	-0.0055189	0.00124738	-0.00832914	-0.00497572	0.00635336	0.013833	0.00935627	-0.015862	-0.0120474	-0.0111619	-0.0149601	-0.00637776	0.00479143	0.00808131	-0.00434439	-0.00909575	-0.00335025	0.0178095	0.0110002	0.017293	0.00650709	0.0249755	0.0394981	0.043323	0.0603832	0.0557077	0.0667683	0.0668994	0.0707407	0.0660365	0.0662989	0.0619779	0.0562611	0.0550538
		33.668	-0.013215	-0.014247	-0.0106688	0.000406194	-0.00880061	-0.000167389	0.00566493	0.00695683	0.00431942	0.00074123	0.00257723	0.000486603	0.00405943	0.00116204	0.00742856	0.0083747	0.015984	0.0128481	0.00492516	-0.00479893	-0.00320952	0.00121564	0.00133625	-0.00724604	-0.00262254	0.00778772	8.18786e-05	-0.00467564	-0.00449338	-0.00993437	0.000596494	0.0161073	0.00712836	0.0100365	0.0167613	0.0212481	0.0157884	0.0293801	0.0381554	0.0453949	0.0513558	0.055127	0.0537601	0.054398	0.054004	0.050919	0.0501444
	2	34.968	0.00831846	0.00729148	0.00741719	0.00660115	0.00781136	0.00812244	0.00779006	0.00645627	0.00615159	0.00661181	0.00587034	0.00499465	0.00231216	-0.00182768	-0.00452508	-0.00356629	-0.00535816	-0.00473601	-0.00526441	-0.00801721	-0.00909532	-0.00750159	-0.0065705	-0.00742702	-0.00761239	-0.00644266	-0.00552861	-0.00450804	-0.000319185	0.000692872	0.00185834	0.00214384	0.00336044	0.00200961	0.00768352	0.00440233	0.00966929	0.0136238	0.0179383	0.0221634	0.0267656	0.0323926	0.0376681	0.0428498	0.0480337	0.0495188	0.0497872
		34.653	2.7289e-05	0.000476904	0.0011119	0.00133778	0.000282994	0.00107568	0.00200474	0.000274471	0.00237978	0.00166806	0.00158709	0.00180657	0.00275907	0.00117157	0.0018428	3.36816e-05	0.00144645	0.0019259	-0.00157726	-0.00152612	-0.000594927	-0.00308166	-0.00416841	-0.00221865	-0.00393401	-0.00262565	-0.00147072	-0.001573	-0.00149629	0.000314957	0.00177035	0.00455114	0.0105602	0.00951608	0.0137587	0.0201555	0.0286535	0.0330069	0.037015	0.042502	0.0498749	0.0530563	0.0588203	0.0615372	0.0649189	0.0663785	0.0640878
		34.024	-0.0065069	0.00234758	0.00678285	0.0232816	0.0343342	0.0272951	0.0176429	0.0156671	0.0220874	0.0201299	0.0110279	0.00931564	0.00473598	0.00274183	-0.00236274	-0.00233294	-0.00363258	-0.00704555	-0.0071487	-0.00970671	-0.0135369	-0.0113341	-0.0116275	-0.0140938	-0.0149924	-0.0156158	-0.0168169	-0.0176787	-0.014919	-0.0165235	-0.00661463	-0.00288305	0.00726648	0.0141176	0.0201987	0.0275931	0.0331629	0.0310427	0.0394479	0.0634305	0.0764199	0.0854234	0.0901612	0.098775	0.109266	0.114923	0.117353
		34.648	0.000189693	0.00162261	0.00287694	0.00324899	0.00388254	0.00415679	0.0032171	0.00298962	0.00332553	0.002456	-0.000807396	-0.0014622	-0.00116881	-0.00208937	-0.00259535	-0.00304394	-0.00299929	-0.00227646	-0.000745742	-0.00145582	-0.00353929	-0.00666875	-0.00394111	-0.00145582	-0.00165567	-5.05437e-05	0.00183946	0.00342758	0.00163111	0.00265797	0.00623813	0.00781349	0.012429	0.0130009	0.0174867	0.0223744	0.0250468	0.027126	0.0316586	0.0378176	0.0425819	0.0439617	0.0460282	0.0529227	0.055002	0.0564328	0.0538561
		34.168	0.00229783	0.000999516	0.000657128	0.000305548	-0.00246803	-0.00415699	-0.00459359	-0.000937621	-0.00236692	-0.00111916	-0.00241058	-0.00276216	-0.00221526	-0.00384907	-0.000944514	0.00108454	0.00185893	0.00131203	0.000668617	0.00197383	-0.00138571	-0.00329987	-0.00211645	0.000583595	0.00196004	0.00440731	0.00317793	0.00233	0.00406722	0.00586189	0.0101751	0.0108621	0.0120318	0.0164989	0.0237304	0.0367757	0.044129	0.041468	0.0470588	0.0513926	0.0552646	0.0593549	0.0593112	0.0619791	0.0658442	0.0672482	0.065989
	3	36.707	0.0290865	0.02632	0.0215484	0.026827	0.0268628	0.0228065	0.0199137	0.0135706	0.0194341	0.0199074	0.0171682	0.0191774	0.0124072	0.00214668	-0.00108484	-0.00776879	-0.013384	-0.0107773	-0.0110256	-0.0146063	-0.00747635	-0.00683468	-0.0132577	-0.0152732	-0.0144001	-0.0182881	-0.0184795	-0.0235351	-0.0334653	-0.0308018	-0.0367178	-0.0378076	-0.0420216	-0.0446515	-0.0399746	-0.0381253	-0.0400903	-0.022662	-0.0152291	-0.00154559	0.0126975	0.0218893	0.0445267	0.0732948	0.0841907	0.0956988	0.0992943
		39.381	-0.00420348	-0.0014285	-0.00276538	-0.00301209	-0.00611812	-0.0027464	-0.00383657	-0.0024765	-0.00143905	0.00742358	0.00812576	0.0117927	0.0143188	0.01244	0.00790856	0.00583366	0.00577462	0.00413831	0.00372291	0.0029638	0.001745	-0.000730543	-0.00337267	-0.00595576	-0.00712395	-0.00694682	-0.00772702	-0.00874549	-0.00900064	-0.00148333	0.0048426	0.010789	0.0126172	0.0138022	0.0121933	0.0191497	0.0129461	0.0172477	0.0246027	0.0257076	0.0270719	0.0308063	0.0422014	0.0508658	0.0562007	0.0636062	0.0765533
	4	292.307	0.00318542	0.00167002	-0.000362083	-0.00192445	-0.00186727	0.000842883	-0.000513214	-0.000425394	0.000738725	0.00404319	0.000477309	0.00185791	0.00203355	0.00341211	0.00364902	0.00447003	0.00250533	0.00423721	0.00358571	0.000610059	-0.00618676	-0.00415058	-0.00288843	0.00296689	7.7015e-05	-0.0023758	-0.00224305	-0.00376866	-0.00405663	-0.00507779	-0.00452228	-0.00266786	-0.0033745	-0.0044365	-0.000572441	0.00722103	0.0107624	0.0134766	0.0172018	0.0205553	0.0236514	0.0233655	0.025706	0.0261921	0.0229857	0.0167096	0.0167464
		33.461	0.0017358	0.0065233	0.00851423	0.0110324	0.0107561	0.00614368	-0.00147836	0.00224197	-0.00234307	0.000767755	0.00492466	0.0090921	0.00237906	0.00207114	-0.000312069	0.000187772	0.00305184	0.000655977	-0.00140666	-0.00590522	-0.0106337	-0.00721071	-0.00787084	-0.00976686	-0.00151843	-0.00299687	-0.00951166	-0.00464191	0.00051889	0.00159871	-0.00659909	-0.00620892	-0.00264888	-0.00367176	0.000187772	0.00328594	0.0107962	0.026519	0.0369988	0.0432458	0.0493219	0.0533164	0.0585383	0.0594431	0.0563724	0.059886	0.0567035
		34.614	-0.00151395	0.000747311	0.002692	0.00467965	0.00088977	0.00148674	-0.00305161	0.000109635	-0.000944113	0.00153423	0.000403599	0.000794797	0.000301842	-0.000548393	-0.00346316	-0.0018961	-0.000557438	-0.00153883	0.00237994	0.000901077	0.00198196	-0.000496384	0.00211764	-0.000261212	-0.000182068	0.00160659	-0.000505429	-0.000503167	-0.00328226	-0.00486288	-0.00290915	-0.000308699	-0.00535131	-0.00435184	-0.00604552	0.000365157	0.00466608	0.00795395	0.0120514	0.0194954	0.0305892	0.0371378	0.0472796	0.0543257	0.0583077	0.0611072	0.056605
		314.781	0.00225729	0.000877104	0.00212605	0.00413836	0.00245414	0.00229447	0.00167109	0.00249133	0.00383651	0.00397431	-0.00129925	-0.00114177	0.000579632	0.000890228	0.0013255	-0.000146549	-0.00101709	-0.00112208	-0.00228791	-0.00346904	-0.00206918	-0.00207574	-0.000732743	-0.000721806	-0.0013255	-0.00331593	-0.0025985	-0.00249789	-0.0023929	-0.00232509	0.00160547	0.00223541	0.00319126	0.00582257	0.00873167	0.0127125	0.0147839	0.0182442	0.0196922	0.029115	0.0330959	0.0369237	0.0403293	0.0412195	0.0404212	0.0393888	0.0434637
		34.464	0.00232792	-0.00280707	-0.00573094	-0.00604519	-0.00519809	-0.00767108	-0.00825176	-0.00169127	-0.0002225	0.00286305	0.0035758	-0.00208521	-0.0050774	-0.00318053	0.00345055	0.00481229	0.000558565	-0.00234937	-0.00260668	0.00236207	0.00389005	0.00277196	0.00265583	0.00228237	0.00572088	0.0043728	0.00171991	0.00195674	0.0073741	0.00155141	-0.0013292	7.80845e-05	-0.000295369	0.00232108	0.00675015	0.00702114	0.0160273	0.0191812	0.0200146	0.0199964	0.0247875	0.03774	0.0510522	0.0555656	0.0578609	0.054263	0.0592751
		348.67	0.00399088	0.00275815	0.00371977	0.00536263	0.00419015	0.00351586	0.00654206	0.00459102	0.00574727	0.00380087	0.00296901	0.000742235	0.000394663	7.72134e-05	-0.00150076	-0.00176492	-0.00224689	-0.000986358	-0.00285398	-0.00233494	-0.00230481	-0.00269641	-0.003424	-0.00440415	-0.00280764	-0.00315289	-0.00260604	-0.00442037	-0.00406121	-0.00357461	-0.0032618	-0.00185761	0.000874312	0.00320073	0.00213484	0.00824053	0.0163482	0.0262146	0.03714	0.0462672	0.0542104	0.0606081	0.0650176	0.0658425	0.0689035	0.0715682	0.0762952
	5	35.078	0.0030379	-0.000331379	-0.00209847	-0.00388278	-0.00999868	-0.00185236	-0.00849247	-0.00348162	-0.00238396	0.00256044	0.00269581	0.00266381	0.00325448	-0.000821143	0.00262443	0.00290008	-0.000764537	0.00535628	0.0124886	0.0153066	0.00665084	0.00354982	-0.000134489	-0.00415351	-0.000218167	-0.00136259	-0.00880012	-0.01023	-0.00221414	-0.00155456	-0.000314151	-0.00365636	0.00730796	0.00942453	0.00698309	0.00965095	0.0171475	0.0297731	0.0499642	0.0573919	0.0568012	0.0530357	0.0602148	0.0681298	0.0699584	0.075747	0.0726238
		34.765	0.00726467	0.00603238	0.0100026	0.00942945	0.0106044	0.00944929	0.0121321	0.011506	0.00824566	0.0070795	0.00150443	0.00541955	-0.00144954	-0.00568209	-0.00579231	-0.00339607	-0.00164794	-0.00520813	-0.000323059	-0.00105053	-0.00476504	-0.00383476	-0.0066256	-0.00416322	-0.00335639	-0.00737291	-0.0127209	-0.0117289	-0.00851702	-0.00809597	-0.00293975	-0.00485321	0.00509549	-0.00272592	0.0016874	0.00576344	0.016314	0.0209764	0.0284826	0.0412089	0.0447955	0.0405299	0.0364032	0.0401066	0.0408826	0.0399104	0.0421744
		34.785	0.00683209	0.00966724	0.0077257	0.00320788	0.00400441	0.00603307	0.00230681	0.00425084	0.00822104	0.0012514	-0.00205669	-0.00794603	-0.00341079	-0.00335354	-0.00569832	-0.00445125	-0.00263666	-0.00327388	-0.00427701	-0.00742331	-0.0055664	-0.00222844	-0.00507105	0.00327011	0.0057045	0.0023989	0.00115682	-0.000645334	-0.00487192	-0.00634799	-0.00565849	-0.00410526	-0.000620442	0.00230681	0.00286935	0.00731748	0.0188149	0.0219612	0.0300335	0.0397213	0.051963	0.0585045	0.0635525	0.0630795	0.0704624	0.0810587	0.0768769
		35.426	0.00563878	0.00572875	0.00149105	0.00192705	-0.000211412	0.0014057	-0.000169889	-0.00193233	-0.00281816	-0.00253903	-0.00245599	0.00030071	0.00124422	0.00189475	0.00182324	0.00118885	0.000312244	-0.00166243	-0.00180776	-0.0013856	-0.00033829	-0.00398313	-0.00349638	-0.00196462	-0.00309729	8.38655e-05	-2.225e-05	0.000755161	-0.00129333	-3.60912e-05	0.000632898	0.00382559	0.00668609	0.00449919	0.00668379	0.00544731	0.015293	0.0148247	0.0150254	0.016248	0.0217499	0.0222297	0.0243497	0.0262667	0.0267419	0.0269657	0.0274132
		34.075	-0.0133071	-0.00982588	-0.00904108	-0.00674994	-0.00488048	-0.00408631	-0.00403477	-0.00225902	0.000987931	0.00146584	0.00639718	0.00899989	0.0102673	0.0108717	0.00771142	0.00752401	0.00852667	0.00258564	-0.00084873	-0.00438383	-0.00701701	-0.00619472	-0.0091137	-0.00259871	-0.0056114	-0.00326872	0.00225532	0.00959728	0.00978938	0.00982686	0.00659162	0.00273557	0.00580214	0.00778639	0.0180778	0.0258602	0.0364983	0.0528431	0.0540332	0.074445	0.0763402	0.0791327	0.0751384	0.0898223	0.0909117	0.093156	0.0836377
		33.974	0.0112989	0.015832	0.0133573	0.00846404	0.00840089	0.0106043	0.00814827	0.00466546	0.00230538	-0.00156806	0.00176038	-0.00265336	-0.00126866	-0.00325216	-0.00584146	-0.00341121	0.00203639	-0.00153765	-0.00372932	-0.00957455	-0.010454	-0.00675368	-0.00987395	-0.00993476	-0.0103979	-0.00880501	-0.0112774	-0.00301825	0.00281763	0.00623261	0.00742785	0.00707466	0.01557	0.0120755	0.0237519	0.0220234	0.0316555	0.0324461	0.0504262	0.0535652	0.0628675	0.064023	0.0580772	0.0587976	0.0646429	0.0638125	0.0716529
	6	57.663	0.0100161	0.0093113	0.00574166	0.00546891	-0.000719053	0.000939217	0.00208691	0.000845394	-0.00254315	0.00270004	0.00649442	-0.00149364	-0.010876	-0.00845401	0.00251021	-0.00245805	0.00196036	-2.0834e-05	-0.00149582	0.000725388	-0.000804148	-0.0029839	-0.00486036	-0.0023686	-0.00681538	-0.00347047	-0.00144127	-0.00129945	-0.00369303	-0.00375631	-0.00647281	-0.00772306	-0.0061608	-0.00420797	-0.00637899	-0.00631353	-0.00575714	-0.00508729	0.00237275	0.00451104	0.00686753	0.0100248	0.0114998	0.0103695	0.0129355	0.0175568	0.0183772
		50.118	0.00227101	-0.00106174	-0.000434017	0.0027147	0.00239453	0.000203794	0.00273739	0.00244495	0.00304747	0.00191555	0.00129286	0.0026542	0.00254831	-0.00135922	-0.00268274	-0.000492	-0.00340879	0.00108362	0.00065253	-0.0011651	-7.60363e-05	-0.00177266	-0.00011133	-0.00140964	-0.00175754	-0.000844938	-0.0025819	0.00111639	-0.00192644	-0.00208779	-0.00390542	-0.0037113	-0.000272674	0.0025584	0.00284075	0.00300966	0.00301974	0.00330209	0.00391721	0.00683904	0.00854323	0.00976591	0.00857348	0.0116642	0.0120524	0.00621131	0.0083592
		36.378	0.0156681	0.00990352	0.00572287	0.00434664	0.00434015	0.00216759	0.00496767	0.00340318	0.00399392	0.00511266	0.00501312	0.0033361	0.00432933	-0.000721205	-6.28224e-07	0.000741588	-0.001273	-0.00279205	-0.00548827	-0.00757426	-0.00655939	-0.005049	-0.00679093	-0.00673251	-0.00646418	-0.00673251	-0.00645336	-0.00633002	-0.00479366	-0.000608683	0.00131718	0.00844505	0.00933009	0.0114334	0.0139154	0.0149735	0.0127447	0.019059	0.0259207	0.0283139	0.0285974	0.0320272	0.040118	0.0424593	0.0451404	0.044515	0.0499529
		35.28	0.00126173	-0.000552834	-0.0078488	-0.0064464	-0.00858266	-0.0019879	-0.00284492	-0.00314399	-0.0037899	-0.00845449	-0.0023297	-0.00175165	-0.00317415	0.00225195	0.00471996	0.00272444	0.00353874	0.0039484	0.00383027	0.00372723	-0.000349261	0.000311724	0.00476269	0.00147033	-0.000585506	0.00383279	0.00541865	0.00400871	0.00225949	0.00221928	0.00155578	-0.000497542	0.00404139	0.0101209	0.0175375	0.0151198	0.0219885	0.0247129	0.02749	0.0296891	0.0413481	0.0495614	0.0562315	0.0590489	0.0585286	0.0592248	0.0687626
		37.687	0.00548629	0.00346512	0.00631606	0.00371181	0.00209993	0.00469296	0.00388281	0.00453317	0.00403419	0.0039613	0.00278953	0.00308388	0.00259611	-0.000526745	-0.00171814	-0.00231524	-0.0021106	-0.00302447	-0.00347579	-0.00403925	-0.00519701	-0.0060436	-0.00453263	-0.00633514	-0.0046756	-0.00586419	-0.00442891	-0.00234047	-0.000868745	0.00209993	0.00415473	0.00388281	0.00876332	0.0155473	0.0177843	0.0298496	0.0398881	0.0390668	0.0381361	0.0458086	0.0464001	0.0533523	0.063388	0.0641477	0.0673238	0.0694655	0.0761794
		34.739	0.0614219	0.0666271	0.0484873	0.0353962	0.0280078	0.0365563	0.0377416	0.0290756	0.0222854	0.0168399	0.00826619	0.00466843	0.00196521	-0.00558813	-0.0112713	-0.0154533	-0.0168399	-0.01457	-0.0170132	-0.0213154	-0.024027	-0.0205634	-0.01975	-0.0222966	-0.0248293	-0.0269175	-0.0294111	-0.032296	-0.0326482	-0.0305125	-0.032036	-0.0204908	-0.0202084	-0.0237726	-0.0292014	-0.0254555	-0.0253409	-0.0244379	-0.0272362	-0.0224168	-0.0235574	-0.023152	-0.0222211	-0.0198534	-0.0197528	-0.0208206	-0.0190874
	7	37.604	0.0844646	0.0723954	0.0632735	0.0395636	0.0286492	0.00717648	0.0115946	0.0221307	0.0197688	0.00494733	0.00323522	-0.0109746	-0.00810571	0.000189246	-0.0259349	-0.0321918	-0.0118558	-0.0325399	-0.0324896	-0.0294879	-0.0375253	-0.0219353	0.0197648	0.00797721	0.00354706	-0.0168654	-0.0374187	-0.0384588	-0.0247841	-0.0201951	-0.00791458	0.00988446	0.00440814	0.0208069	0.00487289	-0.0211185	-0.0268725	-0.0538376	-0.0518076	-0.0909184	-0.0501699	0.0318259	0.0465549	0.0675226	0.081481	0.0856576	0.116699
		35.949	0.139322	0.125872	0.0615667	0.0100064	0.00584456	0.000859937	0.000604369	0.0116312	0.0120696	0.00608142	-0.00214663	-0.00979082	-0.0291163	-0.0192136	-0.0390129	-0.0472326	-0.0355866	-0.00509917	-0.0146279	-0.0147734	0.00841894	-0.00390444	-0.028412	0.0117205	-0.0429524	-0.0207803	-0.0169239	-0.028279	-0.0272027	-0.00738681	-0.00155653	-0.0379137	0.0210083	0.0383994	-0.00311488	0.0845471	0.0941839	0.0978034	0.1044	0.120046	0.15269	0.176065	0.178129	0.219105	0.203954	0.256904	0.2747
		38.165	-0.0123546	-0.0309601	-0.0488534	-0.02363	0.0139525	0.00118249	0.00930604	0.0211507	-0.00804663	-0.0283731	-0.0147042	-0.00240014	-0.0169614	-0.0312172	-0.00081763	-0.00309688	-0.0146756	-0.000738505	0.0204122	0.0446268	0.0170515	0.00518712	-0.0030815	-0.00157811	0.00667072	0.0374505	0.0329558	-0.00884667	0.00214078	0.0125656	0.0256828	0.0355186	0.0608783	0.0444817	0.0776705	0.0480182	0.0275269	0.0922472	0.045073	0.0896404	0.120297	0.111589	0.177457	0.143615	0.180516	0.196071	0.267772
		34.463	0.0163521	0.0150078	0.0202209	0.0264597	0.047024	0.0341061	0.0099821	0.00793059	0.010769	0.00789078	-0.0107929	-0.00832456	-0.00297097	0.000968113	-0.00592645	-0.00871332	-0.0179357	-0.0156407	-0.0122379	-0.0186102	-0.0209662	-0.0165353	-0.00506229	-0.0160107	-0.0163456	-0.00915828	-0.0131957	-0.00635736	-0.006259	-0.000593937	0.00494701	0.00686269	0.0144224	-0.00372975	0.0127198	0.0104552	0.0125114	0.0305323	0.0221741	0.0561785	0.0659911	0.0799418	0.0763165	0.0946677	0.135939	0.152841	0.169126
		316.993	0.0022498	0.00275464	0.00292919	-0.00715697	-0.00446088	-0.0027154	-0.00422994	5.31872e-05	0.0045592	0.00386369	-0.000760473	-0.00162784	-0.00608551	-0.00222936	0.00475523	0.00213702	-0.00433735	-0.00483951	-0.00137273	0.000963519	-0.00617681	-0.00776117	0.000378114	0.00425844	0.00199201	-0.00612579	0.00363275	-0.00490665	0.00871343	0.0147984	0.00674775	0.00264723	0.0103246	0.0241622	0.01435	0.0199516	0.02029	0.020913	0.0208673	0.0158376	0.0218313	0.0264582	0.0405563	0.0451213	0.0420144	0.0359455	0.0411068
		35.373	-0.00126604	0.0018793	-0.00391186	0.000136706	-0.00673102	-0.00279879	-0.00275089	-0.00277826	-0.00117252	0.00375418	-0.0011155	1.12572e-05	0.00234916	-0.00608553	0.00124977	0.00278937	0.00160103	-0.00062967	-0.00216698	-0.000191741	0.00397543	-0.00238595	-0.00298582	0.00181087	0.00849841	0.00605787	0.00554695	0.00468022	-0.00150097	0.000834655	-0.000990049	-0.00280791	-0.000476851	-0.00268246	0.00239934	-0.00495878	-0.000730029	0.00675354	0.0175809	0.0217389	0.0239879	0.02839	0.0277285	0.027416	0.0330566	0.038809	0.0356591
		34.306	-0.00223948	-0.00306199	-0.000283041	-0.000192707	0.00332555	-0.00176879	-0.00598357	-0.00404378	0.00455219	-0.00287657	-0.00260081	0.000444384	-0.00170461	0.000836622	-0.000798894	-0.00120302	0.00632796	0.000762929	0.00132395	0.000382576	0.00284536	0.00407675	0.000337409	-0.000756104	-0.00152394	-0.000418541	-0.0017783	0.000789078	0.000451515	0.00110287	0.003675	0.00391748	0.00230811	-0.00631163	0.00153077	-0.000565928	0.00157831	0.00254108	0.00465203	0.00617107	0.00382001	0.0124041	0.0172845	0.0211308	0.0262347	0.0354392	0.0401413
	8	38.839	-0.0869308	-0.092688	-0.0761944	-0.0549974	-0.0433404	-0.0231645	-0.0214004	-0.0259263	-0.0348542	-0.0335971	-0.0307278	-0.0349897	-0.00795597	0.00244861	-0.00271045	-5.6152e-05	0.0051403	-0.00870133	-0.0061031	-0.00854945	0.0139631	0.0390504	0.0927977	0.0990736	0.0873816	0.0700749	0.0301249	0.0218886	0.0320852	0.0458123	0.0530463	0.107044	0.141898	0.155398	0.146585	0.21351	0.272337	0.327339	0.388425	0.381133	0.425132	0.455161	0.451138	0.398068	0.39261	0.366929	0.331108
		39.296	0.152506	0.130786	0.146425	0.108611	0.0904604	0.0720616	0.0651274	0.0278917	0.0101209	-0.0175927	-0.0428936	-0.0322936	-0.0160885	-0.0400808	-0.0261656	-0.024302	0.00100762	-0.0388482	-0.0588768	-0.0873528	-0.0810144	-0.0399669	-0.0338446	-0.0530847	-0.0633195	-0.0232476	-0.0156065	0.0057132	-0.0427184	-0.0429024	-0.0305119	0.0245969	0.0305409	0.0143532	0.0789316	0.116953	0.0575973	0.0882756	0.182338	0.143314	0.254455	0.380752	0.395377	0.382534	0.255705	0.248622	0.264304
		35.311	-0.0466303	-0.0177826	0.00515731	0.00532716	0.0129413	0.039901	0.0726592	0.067917	0.0281402	0.0174004	0.0148975	0.00963986	0.0119495	-0.0294283	-0.0347835	-0.0214335	0.00835523	0.0298036	0.0339874	0.0232554	-0.00485426	-0.0147799	-0.00122292	0.00461065	-0.00964528	-0.0175561	-0.042626	-0.0403281	-0.0239129	-0.0171637	0.00305855	0.0593775	0.04322	0.0482824	0.0760387	0.173542	0.103617	0.193198	0.239285	0.217569	0.263088	0.294682	0.331671	0.330152	0.337495	0.347973	0.410741
		49.163	-0.00287604	-0.00737056	-0.0117731	-0.0134599	-0.0148791	-0.0189275	-0.0178318	-0.0205112	-0.0218857	-0.0270689	-0.0274035	-0.0256972	-0.0351546	-0.00197546	0.0563195	0.0305652	-0.000620412	0.0137805	0.00739835	-0.0147341	-0.00240205	0.0149208	0.00479699	0.0165714	-0.00733152	-0.0129803	0.000500431	0.00443453	0.0314379	0.0509579	0.0531995	0.0680605	0.0760513	0.0941019	0.140433	0.0809501	0.113098	0.125187	0.0970434	0.0912831	0.104686	0.0693765	0.0644247	0.0805012	0.084809	0.140422	0.0891585
		45.044	0.0196603	0.0126377	0.0148382	0.0150147	0.0136547	0.0095928	0.00933203	0.0100862	0.00485292	0.0230883	0.00687484	0.00456207	-0.0125701	0.00371759	0.00105981	0.00115208	0.0032061	0.00481882	-0.00130511	-0.00331098	-0.00616935	-0.0128048	-0.0144817	-0.0124758	-0.0180802	-0.00553951	-0.0319067	-0.032695	-0.0219275	-0.0175687	-0.0183871	0.0140358	0.00524005	0.0241093	0.032901	0.0562775	0.0790522	0.146175	0.112454	0.0577899	0.0584017	0.0389989	0.134061	0.167573	0.141764	0.191534	0.192035
	9	45.009	-0.0119602	0.0305722	0.0111634	-0.00241584	-0.00983216	-0.014987	-0.0179818	-0.0247875	-0.000239752	0.0215052	0.0210198	0.000269603	-0.029185	-0.0126029	0.00151499	0.017097	0.018305	0.0125715	0.00465912	0.00215235	0.00553649	-0.00350656	0.00140298	0.0126995	0.0057925	0.0138568	0.00166966	-0.00573865	-0.0108722	-0.0212326	-0.0164458	0.00789659	0.0332363	0.0656484	0.0610508	0.0590881	0.0526931	0.0462475	0.0747607	0.0751928	0.0619735	0.0453515	0.0821237	0.0818384	0.151591	0.105189	0.153724
		33.539	0.00553522	0.0105349	0.0165026	0.0226889	0.00814096	-0.00571002	-0.0199664	-0.0109511	0.00398635	-0.00166018	0.00341464	-0.00255306	-0.00271023	0.00721392	-0.000266203	-0.00475337	0.000143792	0.0041048	0.00823435	0.0187985	0.012455	-0.00490142	0.00074284	-0.00156907	0.0168032	0.00334631	-0.0121652	-0.0174678	-0.026966	-0.0368651	-0.0119784	-0.0108008	-0.00997624	0.019573	0.0517621	0.0579804	0.0570191	0.0652054	0.0773868	0.0833659	0.0911353	0.0845776	0.0909416	0.113995	0.105392	0.105483	0.115801
		33.865	0.0540284	0.0282838	0.00816372	0.0100003	0.00920268	0.000817369	-0.0042303	-0.00222595	0.00486139	-0.00476009	0.0131584	-0.00840677	0.00533526	0.00504387	0.0177764	-0.0198472	-0.0311316	-0.0177869	-0.0179076	-0.0184992	-0.00850979	-0.0239383	-0.0268639	-0.0188435	-0.0138959	-0.00906312	0.00518515	0.00959708	-0.00207584	0.00628592	0.0502463	0.063591	0.0639088	0.053166	0.0626815	0.0944774	0.103902	0.11797	0.114901	0.128796	0.16015	0.159235	0.143394	0.13953	0.13696	0.143594	0.135812
		33.425	0.0140453	0.0139158	0.0225665	0.0217387	0.0155041	0.0109711	0.0148974	0.00226106	-0.00265755	0.00196174	-0.00291643	0.00134691	-0.00720943	-0.0124463	-0.0022207	-0.00901077	-0.00897302	0.000157708	-0.00901347	-0.00632494	-0.0134791	-0.0065164	0.000772536	0.00322645	0.00073748	-0.00582607	-0.00844718	-0.00864673	-0.00711505	-0.0158736	0.00257387	0.0160407	0.0241629	0.0222187	0.019843	0.0283346	0.0246052	0.0286366	0.0308991	0.0311579	0.0296209	0.026269	0.0351112	0.0318105	0.0240659	0.0246106	0.0193845
	10	43.489	0.00924358	0.0015812	0.0152806	0.0218926	0.0155438	0.0213132	0.0211695	0.0106124	0.0128105	0.0220231	0.0125628	0.0143209	0.00301859	0.00871064	-0.00436738	-0.0160168	-0.0231087	-0.0276	-0.0294796	-0.0251255	-0.025497	-0.0296632	-0.0141681	0.000358313	0.00348961	0.00235739	0.00527418	0.00478104	0.00870179	-0.00601705	-0.0140023	0.00750987	0.000404751	-0.023761	-0.00992675	-0.0183609	-0.0304394	-0.0266137	-0.0367661	-0.0453904	-0.0394507	-0.0363017	-0.0325114	-0.0331107	-0.00671142	0.0221911	0.0262534
		35.083	-0.00729458	-0.00172428	-0.000442858	-0.00733443	-0.0105139	-0.00816494	-0.0133326	-0.017374	-0.00212276	-0.0161198	-0.0185484	-0.0201067	-0.015952	-0.012263	-0.00778324	0.0067591	0.0102091	0.00275545	0.00901155	0.0241957	0.015534	0.0111948	0.0167693	0.0104733	0.00412496	0.00579437	0.0100832	0.0105782	0.0143281	0.0195712	0.0151208	0.0201102	0.0490376	0.0740284	0.0671138	0.0708763	0.079215	0.098365	0.10249	0.0912385	0.105796	0.105498	0.11188	0.120592	0.132154	0.136394	0.150175
		35.273	0.00339208	-0.0168392	-0.0204236	-0.0169462	-0.0324216	-0.0117314	-0.010529	-0.018202	0.00554614	-0.0172728	-0.00512278	0.0112396	0.000556613	0.015345	0.0118253	-0.00182834	0.00107753	0.0235727	0.0210244	0.0203064	0.0168711	0.00787759	0.000708664	0.0130192	0.00604453	0.00881806	0.00800712	0.00318653	-0.00495102	-0.0152426	-0.00690797	0.0123124	0.0295167	0.034847	0.0501056	0.0461297	0.0631904	0.059299	0.0697821	0.0859446	0.103186	0.108983	0.119041	0.131816	0.151718	0.165957	0.167996
		35.601	-0.00499115	0.000482452	-0.00693129	-0.0113645	-0.0114688	-0.00941709	-0.00561927	0.00159803	-0.00599517	0.00298765	0.0065381	0.00854856	0.00405715	0.00316711	0.00335385	0.00735781	0.00645807	0.00211217	-0.00266299	-0.00350453	-0.00543253	0.00241531	0.0113496	0.00667391	0.00652355	0.00421236	0.00542252	0.00677819	-0.00401624	-0.0145972	-0.00403564	-0.00987787	0.0162461	0.0162558	0.0134959	0.0107094	0.0172452	0.0409973	0.0548644	0.0540423	0.0497498	0.0695755	0.102107	0.0992717	0.0972346	0.10509	0.104985
		37.898	-0.00257359	-0.00383905	-0.00454413	-0.00022411	-0.0056649	-0.0050471	-0.00374948	-0.00244268	0.00183829	0.00301877	0.000600391	0.000873694	-0.00108536	0.00119523	0.000492448	0.00208403	0.00207714	0.00458739	0.00194623	-0.00230488	-0.000750045	0.00103446	-2.20035e-05	0.000761158	-0.000476742	0.00324844	0.0052695	0.000657808	0.000274266	0.00190949	0.00354012	0.010205	0.00786013	0.00914397	0.0114613	0.0162636	0.0138452	0.0178253	0.0206158	0.0217251	0.0162154	0.0182571	0.0214977	0.0256501	0.0251655	0.02486	0.024713
	11	53.734	-0.028722	-0.0388254	-0.0397937	-0.0409975	-0.0445392	-0.0442556	-0.0403154	-0.0273578	-0.00381805	-0.0106018	0.00234509	0.00412394	0.0081364	-0.00480511	0.00129382	0.00538118	0.0155675	0.0231751	0.0465062	0.0445133	0.0419053	0.0420765	0.0308068	0.0280837	0.0269682	0.0142166	0.00530361	0.00893354	0.00525278	0.00419617	0.0186651	0.0243307	0.0131199	0.0143744	0.0186143	0.0134944	-0.00205257	0.00252164	-0.00682739	-0.0065171	-0.00695847	-0.00459379	-0.00501911	0.00663842	0.0109906	0.018114	0.00857242
		35.459	-0.0134792	-0.00542471	0.00673958	0.00756788	0.00794809	0.00946212	0.0102836	0.000715147	0.00231517	0.00576644	0.0072782	0.00101841	0.000506939	-0.00195081	-0.00253922	-0.0057868	-0.00438819	-0.00635711	-0.00637522	-0.00524366	-0.00720126	-0.00554465	-0.000477519	-0.00229254	-0.00176976	0.00303485	0.00180145	0.00307558	0.00199155	0.00372736	-0.00210697	-0.00198928	0.00517124	0.0157604	0.0184015	0.00642501	0.0330642	0.0435221	0.0698513	0.0991768	0.0947411	0.0873475	0.086492	0.0836563	0.103873	0.108942	0.114824
		36.089	0.00046206	-0.00117228	-0.00231944	-0.00436166	-0.00108448	0.000742476	0.00168286	-0.00136489	0.00124383	0.0016517	-0.0034581	-0.00382065	0.00206241	0.00336252	0.00304245	0.0018953	-5.62842e-05	0.000411075	-0.00101933	3.19797e-06	0.000810455	3.19797e-06	-0.00508394	-0.00458542	0.000909592	0.00286967	0.00278186	0.00414995	0.00411313	-0.00100233	-0.00286894	-0.00203902	0.00102572	-0.00079273	0.00128065	0.00361745	0.00628281	0.00925409	0.0094127	0.0134122	0.0244957	0.0309311	0.0353271	0.0429635	0.0450538	0.0461103	0.0449717
		37.293	0.00704066	0.00553202	0.00709916	0.00492856	0.000710521	0.00476846	0.00676972	0.00751788	0.00978084	0.00596306	0.00382633	0.00209909	0.00291499	0.00226535	-0.00389853	-0.00510852	-0.00318424	-0.00584129	-0.00251612	-0.00283325	-0.00638625	-0.00557959	-0.00541641	-0.00432034	-0.0055488	-0.00546259	-0.00212203	-0.00159862	-0.00152473	-0.0050531	-0.00482219	-0.00444041	-0.00102903	-0.00504387	-0.000376316	0.00218837	0.000756704	0.00364775	0.00458988	0.0145962	0.0185987	0.0267392	0.0337282	0.0355263	0.0436083	0.0399198	0.0370534
	12	35.606	-0.0173319	-0.0206449	-0.017588	-0.00973544	-0.0118457	0.0270027	0.0399659	0.0260973	-0.0194052	0.0495444	-0.0340857	-0.0273598	0.0245212	0.0539712	0.0645419	0.0337372	0.0359343	0.0630634	0.0585086	0.0311059	0.0117013	0.0388673	0.0303374	0.00145403	-0.0277962	-0.0432865	-0.0642326	-0.0644974	-0.0730599	-0.134398	-0.116847	-0.0750356	-0.0652356	-0.0963616	-0.0366366	-0.0655069	0.00425031	0.0576033	0.0686126	0.0710788	0.0740987	0.0844003	0.150845	0.316298	0.346875	0.366527	0.339279
		37.524	-0.0052162	0.0065254	0.0502573	0.0272137	-0.0145466	-0.0238743	-0.000396466	0.00969593	-0.000662897	-0.0322349	-0.0232722	-0.00264248	-0.000894691	-0.0190093	-0.020115	0.0157812	0.0123709	0.00237708	0.00526785	0.011116	0.00857692	0.00760178	0.0107057	0.00398365	-0.0114986	-0.00164603	-0.0074702	0.0220796	-0.0187349	-0.0146878	0.00334955	0.00162841	0.087904	0.0903578	0.0945461	0.0665842	0.095436	0.132326	0.138984	0.196522	0.166253	0.255164	0.27874	0.24781	0.338261	0.32916	0.333761
		35.688	0.0116899	0.0173368	0.0237365	0.0186334	0.008557	0.0126604	0.0169896	0.0138211	0.023816	0.0161384	-0.0225173	-0.00834165	-0.0129177	-0.00297507	-0.00208622	-0.0104916	-0.0235818	-0.00703242	-0.0204572	-0.0204049	-0.0263906	-0.0302618	-0.00576711	-0.0192923	-0.011324	0.0030252	0.00352296	-0.00266554	0.0020255	0.00418803	0.0503665	0.0566993	0.0395581	0.0526691	0.0621035	0.081378	0.109455	0.128326	0.152988	0.13483	0.1468	0.185238	0.199802	0.194641	0.278285	0.247418	0.294596
		34.515	0.000510842	-0.00260096	-0.00462449	-0.00854166	-0.00346406	0.00151828	-0.00255766	0.00363996	0.00481771	0.00217932	-0.000793919	-0.000704434	0.00257479	0.00135374	-0.0029156	-0.00248549	0.000819713	0.0057068	0.00513236	0.00511792	0.00606474	0.00350718	0.00324161	-0.00119516	-0.00502862	-0.00381623	0.00370058	-0.00249992	-0.00709546	0.00146921	0.000510842	0.0196348	0.0335715	0.0349312	0.0182666	0.0412529	0.0391168	0.040563	0.0466163	0.0646924	0.0798098	0.100039	0.0948492	0.109401	0.117905	0.123066	0.118358
		34.186	0.00372184	0.00313581	0.00216329	0.00269261	0.00672132	0.00507455	0.0132559	0.0141297	0.0142599	0.0119431	0.00922299	0.00307069	0.00190703	-0.00387558	-0.00182552	-0.00157556	-0.00302489	-0.00502244	-0.00324124	-0.0026405	-0.00364453	-0.00330845	-0.00636255	-0.00563368	-0.00652638	-0.00700529	-0.00497413	-0.00815005	-0.00929271	-0.00775306	-0.00744219	-0.00114076	0.011899	0.0111596	0.014304	0.00866846	0.0118297	0.0203723	0.0212671	0.0235062	0.0333407	0.0348173	0.0393753	0.0402533	0.0372938	0.0463762	0.0509868
		35.184	0.0016215	0.00078264	0.000269424	-0.00130409	-0.00100971	0.000850374	0.00129846	0.00149645	0.00327317	0.00191588	0.00250986	0.00260625	0.00237439	0.00199143	-0.000277659	-0.00192151	-0.00326578	-0.0020153	-0.00309905	-0.00168705	0.00109526	0.000217321	0.000514309	-0.00123896	-0.000962816	-9.0088e-05	-0.000999288	-0.00209345	-0.00154898	-0.00169226	0.000389261	0.000350184	-0.00116602	-0.00212472	-0.000470441	-0.00157503	-0.00283332	-0.000249003	0.00335133	0.00493787	0.00746487	0.00692039	0.00869711	0.0081891	0.0114742	0.0105285	0.0122948
	13	77.166	-0.0559794	0.0332847	0.0812334	0.173359	0.184824	0.159135	0.124763	0.11025	0.0812793	0.0411861	0.0390986	0.0252914	-0.00190245	-0.0258609	-0.0217319	-0.020213	-0.0319644	-0.0416814	-0.0553295	-0.0628388	-0.0580281	-0.0850242	-0.0895135	-0.0719729	-0.0841871	-0.100855	-0.0762221	-0.0499289	-0.0285701	0.00197936	0.0751193	0.0735969	0.0419455	0.05541	0.0533437	0.059154	0.0543786	0.0124309	-0.0256101	-0.0486926	-0.0800615	-0.0886552	-0.135859	-0.133323	-0.144251	-0.14797	-0.16099
		80.109	-0.121962	-0.169537	-0.152425	-0.134131	-0.0287063	0.0875675	0.120679	0.111893	0.0993631	0.104055	0.102577	0.042131	-0.00739997	0.0390924	0.0202589	0.0332397	0.0543412	0.0559994	0.0766619	0.0217611	0.000330474	-0.0294866	-0.0403288	-0.0646053	-0.065827	-0.0667537	-0.0335201	-0.0302865	0.0378512	0.0622399	0.114597	0.0653443	0.039824	0.0153183	0.0108141	0.0105142	0.0266359	0.0595745	0.0873943	0.064281	0.0476691	0.0253996	0.00522236	0.00886079	-0.0243436	-0.00790233	-0.0196029
		56.601	0.0894717	0.0716886	0.048396	0.0297845	0.0244446	0.0251192	0.0246458	0.0139878	0.0305814	0.0185169	0.0155422	-0.00115398	0.00188187	0.00704419	-0.00194302	-0.0140963	-0.0172012	-0.00354084	-0.0228902	-0.0575923	-0.0525365	-0.0702269	-0.0446185	-0.0207144	-0.013826	-0.0077208	-0.0152621	-0.0124906	-0.00223891	-0.0093482	-0.033704	-0.040689	-0.00973878	-0.0242099	-0.0360061	-0.0150234	-0.0063597	-0.0173392	-0.00828299	0.00708562	0.0146841	-0.00321536	-0.00201404	-0.0151812	0.010228	0.0153844	0.00781154
		42.812	0.0905359	0.0832346	0.0630839	0.0627143	0.0650953	0.0242047	0.00267592	0.00702947	0.0272136	0.0265718	0.00153128	-0.0163386	0.0113747	0.00580981	-0.0101097	-0.0307856	-0.045252	-0.024051	-0.0333055	-0.0534729	-0.0460994	-0.0129185	-0.0171693	-0.021759	-0.0015276	-0.0278989	-0.028174	-0.035742	-0.0200698	-0.0241566	-0.0222452	-0.0721123	-0.0617716	-0.0563373	-0.0646944	-0.0696897	-0.0642526	-0.0575459	-0.0638498	-0.0262292	-0.0269821	0.0213709	0.0179203	0.0339926	0.0916389	0.181149	0.262855
		33.356	-0.0043605	0.000336636	-0.00225382	-0.00313796	0.00675201	-0.0031189	0.0210388	0.0110726	-0.00293301	0.0239486	0.0108605	0.0211366	0.0106127	0.0187773	0.0223281	0.0168326	0.0132913	0.0317081	0.0194326	0.00715237	-0.013607	-0.0221648	-0.0369617	-0.0182255	0.0109487	0.00324643	-0.0253463	-0.0352839	-0.0394044	-0.0370927	-0.036454	-0.0237258	-0.0137333	0.00383506	0.147266	0.330085	0.361985	0.310841	0.238394	0.23879	0.23456	0.210197	0.208479	0.182143	0.177072	0.183184	0.150304
	14	37.401	0.00553498	0.00780103	0.0131729	0.0110969	0.00572499	0.00329708	-0.000894889	0.000651	-0.00073772	-0.00155875	0.000463335	-0.000702533	-0.00175111	-0.00283253	-0.000421035	-0.00103329	0.000219371	-0.00145554	-0.000779944	-0.00188013	-0.00227423	-0.00232349	-0.00309526	-0.00534489	-0.00320786	-0.00756403	-0.007245	-0.00439249	-0.00283722	-0.00234929	-0.00194581	0.0102993	0.0153194	0.0169849	0.0271258	0.0296781	0.0275387	0.0346864	0.0390543	0.0355121	0.036129	0.0402061	0.0437013	0.050354	0.0604621	0.0633827	0.0608586
		35.212	0.0246998	0.0259662	0.0195575	0.0118331	0.00804187	0.00527692	0.00451541	0.00384123	0.00749324	0.00891256	0.00967135	0.00281495	-0.000334843	-0.00385857	-0.00616224	-0.00689919	-0.00821206	-0.0184939	-0.0176178	-0.0211033	-0.0198095	-0.0140804	-0.0110234	-0.0114683	-0.00816839	-0.00310797	-0.00434715	-0.00448089	-0.000564118	-0.00370027	-0.00417246	-0.000263877	0.00387671	0.0032271	-0.00337546	-0.00295239	-0.00136385	-0.00406874	-0.0020817	-0.00105269	-0.000446751	0.000882496	0.00371567	0.00769522	0.00839942	0.00725851	0.00792996
		146.51	-0.0127384	-0.0101202	-0.0114269	-0.0108756	-0.00937179	-0.0101788	-0.00737763	-0.0059301	-0.00710548	-0.0081096	-0.00429724	-0.00289898	0.00219433	0.00676916	0.00398438	0.00675978	0.00805246	0.00510346	0.00692166	0.00548586	0.00555859	0.00437148	0.00240313	0.00330168	0.00338613	3.59478e-05	0.00211456	0.00892755	0.00985424	0.00668001	0.00852637	0.00982375	0.0106402	0.0132044	0.0169933	0.0229735	0.0258427	0.029465	0.035729	0.0398487	0.0389643	0.0402194	0.0420845	0.0412822	0.042908	0.0421784	0.0449256
	15	37.87	0.0329116	0.0383413	0.0382753	0.0192253	0.0326588	0.00795495	0.0232086	0.0326698	-0.00617097	-0.0159378	0.0170623	0.021428	0.0199354	0.0308079	0.0110655	-0.00103147	0.00123712	-0.0105719	-0.0241284	-0.0334951	-0.0183075	-0.00669855	-0.0251066	-0.0081274	-0.0145111	-0.0186218	-0.0593575	-0.0588541	-0.025443	-0.0290723	-0.0165511	-0.0215697	-0.0447414	-0.0463043	-0.0407647	-0.00849011	-0.0342953	0.0175613	0.0219072	0.119307	0.223172	0.314428	0.380311	0.386543	0.401032	0.424744	0.445634
		36.113	0.019918	0.0171292	0.0123881	-0.00236552	-0.00170987	0.0119365	0.0281005	0.00191517	0.0108321	-0.0108744	-0.0263916	0.0432301	-0.017463	-0.0270064	0.0187727	0.0186241	-0.0366985	-0.0667245	-0.0612286	-0.0210502	-0.0333852	-0.0250686	0.0337712	0.0338586	0.0422014	0.04198	0.0209845	-0.00835382	-0.016414	-0.0166238	-0.00646846	0.0239102	0.0534758	0.0541926	0.0300063	-0.011195	0.0318363	0.0662187	0.0897786	0.0754095	0.0724722	0.0391709	0.0379499	0.105071	0.177735	0.179682	0.227413
		34.426	-0.0100146	0.00172854	-0.01351	-0.000491338	0.024971	-0.00184504	-0.00859223	-0.0261051	-0.0243112	-0.027492	-0.0047181	0.0072877	0.00687827	-0.0103554	-0.0247065	-0.0251656	0.000599668	0.00878103	0.0170902	0.019471	0.0244693	0.0199632	0.0125581	0.015017	0.0147046	0.00182084	0.012835	0.00863666	-0.000453472	0.00664161	0.0441665	0.0135805	0.0266016	0.0170973	0.020091	0.0213406	0.00594583	0.0116683	0.0124114	0.0173671	0.0209809	0.0420555	0.0492027	0.0486607	0.0702394	0.0524047	0.0690703
		35.481	-0.00200416	0.00353688	0.00527216	0.00741975	0.0164551	0.0120828	0.00767486	0.0057082	0.0197299	0.0106797	-0.00800498	-0.0128578	-0.0086279	-0.0119946	0.00638748	-0.00216731	0.000914671	-0.00141684	0.00127359	-0.0136231	-0.0182713	-0.0128934	-0.0128341	0.00155836	0.000351075	-0.00493486	-0.00636461	-0.00208129	9.30077e-05	0.00927962	0.00965931	0.0086122	0.0170127	0.00672268	-0.00985298	-0.00467086	0.00820582	0.0131269	0.0167161	0.0265286	0.0361572	0.0567047	0.0446883	0.0606766	0.0546283	0.0616673	0.0693471
	16	42.167	0.00929055	0.00720447	0.00377984	0.00135194	0.00169696	-0.00183309	-0.00205032	-0.00399265	-0.00563787	-0.00412362	-0.00543661	-0.00509159	-0.0062129	-0.00382333	-0.00378819	-0.00414279	-0.00290328	-0.00186184	-0.00374027	-0.00412362	-0.0052673	-0.000548855	0.000224241	0.0035115	0.00401944	0.00134874	0.00456891	0.00532923	0.0056423	0.00627483	0.0103352	0.01529	0.011153	0.00759101	0.00770602	0.0133573	0.0199989	0.0181652	0.0176349	0.0276755	0.0303175	0.0258259	0.0209828	0.0231009	0.0277075	0.0351477	0.0493701
		34.264	0.0011811	0.000363905	0.00209354	0.00115038	0.00128556	0.00114731	-0.000382635	-0.000877256	-0.00030583	0.000763288	-0.00122748	0.000969124	9.04806e-05	0.00174639	0.00150368	0.000274811	-4.75692e-06	-0.00113532	-0.000441006	-0.00174668	0.000923041	0.000600462	-0.00107388	-0.000818884	-0.00131965	-0.00141181	-0.000210593	-0.000465584	-0.00222901	-0.00236112	-0.00173747	0.00217035	0.00405052	0.00522409	0.00379553	0.005731	0.00628092	0.00891992	0.0122348	0.0145912	0.0154483	0.0176511	0.0190397	0.0233592	0.0267017	0.0279152	0.028161
		36.086	-0.00206225	-0.0037783	-0.00181392	-0.00185213	-0.00124403	-0.000951123	-0.000400332	-0.000183836	-0.00119309	-0.00237426	-0.00434501	-0.0035427	-0.00361593	-0.00357136	-0.00320841	-0.000362127	-0.00233287	-0.00068687	0.000908193	0.00193973	0.00189834	0.00273249	0.00223582	0.00321642	0.00285665	0.00424159	0.00393276	0.00291715	0.00331193	0.00296172	0.00436576	0.00488789	0.00720567	0.00751449	0.00516488	0.0054546	0.00340108	0.00667717	0.00934834	0.0124366	0.0162253	0.0229016	0.0262318	0.0302529	0.0338474	0.0324115	0.0331692
		54.562	0.00296128	0.000185227	0.000223215	0.000494976	0.000445299	-0.00017712	-0.00126124	0.00121383	0.0019619	-0.00116773	-0.000723564	-0.00227815	-0.00202392	0.00162293	0.000711215	-0.00046057	0.0011174	0.00172228	0.000603096	0.000936221	0.000664461	0.00159078	-0.000445959	-0.000945648	-0.00205022	-0.00217295	-0.00347039	-0.000554079	-0.000320306	0.00101512	0.00058264	0.00182164	0.00407462	0.00487821	0.00888449	0.0106728	0.0096647	0.01273	0.00811888	0.00790557	0.00569934	0.0043756	0.00431424	0.00297881	0.00282101	0.00251126	-0.000144977
CNO	1	35.184	0.00762237	0.0122898	0.0155086	0.0167254	0.0121039	0.00949579	0.00546657	0.0043967	0.00540229	0.0114633	0.0077762	0.00301001	0.000335342	-0.0015794	-0.000601365	-0.00182505	-0.00213959	-0.00420356	-0.00775524	-0.00754402	-0.00464895	-0.00638461	-0.0129622	-0.0128015	-0.0128543	-0.0094909	-0.00598743	-0.00207071	-0.0100029	-0.012464	-0.0107536	-0.00315894	-0.00214877	0.00132945	0.00336127	-0.00266304	-0.000798808	0.00320975	0.0032924	0.00970471	0.014627	0.0168838	0.0214296	0.0256701	0.028882	0.0321926	0.0375212
		33.53	-0.00865186	0.0121892	0.0246165	0.0197864	0.0219617	0.0124938	0.0098476	0.0151356	0.0162611	0.00340606	-0.0211677	-0.0195671	-0.0197399	-0.0122766	-0.00810102	-0.00355176	-0.00716568	0.0071755	0.00350974	-0.0123867	-0.0111036	-0.00799301	-0.00316294	0.00839598	0.00486631	0.0122583	-0.00429269	-0.00328606	-0.00659972	-0.00318454	0.0117615	0.0267507	0.0244286	0.0547893	0.0606261	0.0825061	0.0783371	0.0908076	0.102207	0.100582	0.0994092	0.12559	0.123674	0.127301	0.111677	0.116947	0.114658
		33.676	0.0037532	-0.000134632	-0.000885927	0.00815496	0.00800746	0.00668463	0.00552312	-0.00520241	-0.00794948	-0.00422296	-0.00534069	0.00367945	0.00967368	0.0082287	0.00423947	0.00208699	0.000936999	0.00759955	0.00461051	-0.00628096	-0.00830208	-0.00549049	-0.00273651	-0.00266276	0.000925476	-0.0012224	-0.00503418	-0.00902572	-0.00419531	-0.00361916	-0.00179854	0.0145871	0.0180992	0.0238284	0.0311201	0.0273982	0.0339409	0.0355127	0.0413133	0.0438645	0.0475357	0.0450583	0.0478883	0.0448762	0.0457796	0.0409123	0.0402163
		34.74	-0.00203665	-0.00979373	-0.00649428	-0.00383901	-0.00475702	-0.00460888	0.0113474	0.00696613	0.00489668	0.00762827	0.0151766	0.00998726	0.0143865	0.0148691	0.00631073	0.00496851	0.00303822	0.00313473	-0.00902161	-0.0105793	-0.0058703	-0.00232171	0.00465876	0.0107863	0.0148781	0.00090143	-0.0153983	-0.0136992	-0.00652346	-0.018682	-0.0203093	-0.00677484	-0.0146576	-0.0240509	-0.0215034	-0.0247512	-0.00934707	-0.00704867	-0.0120338	-0.00606557	-0.00202319	-0.000263478	-0.00636409	-0.00700603	-0.0048064	-0.0163634	-0.014478
		33.57	0.00307364	0.00572347	-0.000331729	0.00151901	-0.000571237	0.00782243	0.0161377	0.0128761	-0.0028139	-0.00912603	-0.0104085	-0.00709021	-0.00562921	-0.00287922	-0.000168428	-0.00018367	0.00585193	0.000319297	-0.000841228	-0.00521116	-0.00241109	-0.00413991	0.00268607	-0.00010964	-0.00293801	-0.00208449	0.00447367	0.00111403	0.00177812	-0.00393306	-0.00138556	-0.00211498	0.00363757	0.00830798	0.00508115	0.0114172	0.0056821	0.0120008	0.0149053	0.0190488	0.0278279	0.0275688	0.030604	0.0294718	0.0261949	0.0213176	0.0189944
	2	35.107	-0.0106052	-0.0109455	-0.00937383	-0.00995249	-0.0083253	-0.00924653	-0.00978815	-0.00623287	-0.00515656	-0.00443903	-0.0020781	-0.0050987	-0.000318972	-0.00032823	0.00066012	0.000132382	0.00191002	0.00337519	-9.90814e-05	0.00283125	0.00297707	0.00616201	0.00927057	0.00544216	0.00313215	0.00365757	0.00638653	0.00896735	0.0117634	0.012812	0.0125087	0.00837481	0.00863867	0.00684946	0.0116732	0.0149322	0.0166219	0.0177954	0.0212025	0.0239361	0.0298083	0.0347455	0.0338219	0.0398724	0.0389188	0.0416986	0.040826
		35.006	0.00637842	0.00386206	0.00489265	0.00200804	0.00150937	-0.000889355	-0.00201711	-0.00228563	0.000563178	-0.000797293	-0.00105046	0.00023329	-0.00107604	-0.0017665	-0.00151077	0.0007115	0.00164746	0.00130479	0.00117692	0.00169605	-0.0019583	-0.00191226	-0.00291472	-0.00295563	-0.000267937	-0.000891912	-0.000779392	-0.00228051	-0.00273059	-0.00255414	-0.00160283	-0.00162585	-0.00329064	0.00111299	0.00357053	0.00497192	0.0172085	0.022167	0.0234661	0.0253176	0.0386206	0.0506807	0.0534246	0.0549104	0.0576876	0.0580226	0.0576927
		33.482	-0.00181711	-0.00138176	-0.00330412	-0.00157009	-0.00246523	-0.00367587	-0.00367587	-0.00433866	-0.00369054	-0.0058697	-0.00383239	-0.0007581	0.00276621	0.00353662	0.00472525	0.00321867	0.0050383	0.00374695	0.00109822	0.000518576	0.00127675	0.000892774	0.00123029	0.000975929	0.00157269	0.00172922	0.00169987	0.00206428	0.00198357	0.00235777	0.00167296	0.00155557	0.00389614	0.00593344	0.00786558	0.00814684	0.0117641	0.0149387	0.0175654	0.0210995	0.02468	0.0255801	0.0274535	0.0281799	0.0285247	0.0313814	0.0318558
		36.09	0.00505148	0.00587417	0.00567073	0.00393592	0.00366542	0.00270412	7.06011e-05	0.00145666	-0.000676083	0.000837406	0.000137669	0.00128676	-2.32933e-05	-0.00053077	-0.00192354	-0.00191683	-0.0059923	-0.00151443	0.0014656	0.000593727	-0.00259645	-0.00231924	-0.000953296	-0.00302792	-0.000459232	-0.0029765	-0.00363376	-0.00161056	-0.00591405	-0.00508465	-0.00407193	-0.00467778	-0.00299438	0.00240231	0.00610667	0.00843391	0.0113022	0.0126748	0.0117918	0.0149328	0.0194062	0.0261956	0.0267053	0.0295758	0.032301	0.0344382	0.0363765
	3	34.809	0.0038455	0.00347112	0.00467871	0.00574476	0.00753672	0.00334785	-0.00106701	-0.0029617	-0.0124466	-0.0116796	-0.00599321	-0.00717796	-0.00308953	-0.000334241	0.000439616	-1.92194e-05	-0.000893517	-0.00586081	-0.00591103	0.00106738	0.00345514	0.00488187	0.00385463	0.000665609	0.00151023	0.00102172	0.000832251	0.000802575	-0.00154182	0.00719203	0.00894062	0.0158711	0.0138623	0.0163391	0.0224203	0.0352312	0.0332087	0.0337246	0.0390114	0.0414106	0.0454945	0.056623	0.0667835	0.0681007	0.0654664	0.0644095	0.063679
	4	288.596	-0.00075139	-0.00183621	-0.0053772	-0.00570965	-0.00155845	0.00919137	0.0112057	0.0130648	0.0121746	0.0148889	0.0102412	0.00934666	0.00603095	0.0048149	0.00276335	0.00261244	0.00622998	0.000261258	0.00306518	-0.00109477	-0.00650577	-0.00824018	-0.00923095	-0.0122208	-0.0112059	-0.00761028	-0.0101146	-0.00970775	-0.00424864	-0.00533565	-0.00514318	-0.00501414	-0.00602241	0.000687752	0.00171352	0.00612062	0.0164308	0.0244227	0.0355662	0.0412724	0.038895	0.0414015	0.0375718	0.0397349	0.0425935	0.0412309	0.0373224
		362.153	-0.00373182	-0.00387295	-0.00519604	-0.00146052	-0.0014958	-0.000770307	-0.00133482	0.000281547	0.00113935	-0.00181996	-0.00013743	-0.000926873	-0.000499074	0.00295198	0.00297403	0.00195084	0.00403912	0.000530729	-0.00305043	-0.000580665	0.00121212	-0.00194565	-0.00112313	-0.00210442	0.00167299	0.00248008	0.00426845	0.00326732	0.00479548	0.00100925	-0.0025234	-0.00267555	-0.00187729	0.00418245	0.00653755	0.0128795	0.0223903	0.0304854	0.0406556	0.0437604	0.0494276	0.0498709	0.0498995	0.0503736	0.0535226	0.0524884	0.0523693
		282.579	0.00596446	0.0109388	0.0055026	0.00190717	0.00198231	-0.000684982	0.00126632	0.00913117	0.000837605	-0.00244844	0.000705014	0.00194474	8.18358e-05	-0.00448151	-0.00364839	0.00160663	-0.000841882	0.00155581	0.00342976	0.00118676	0.000822136	-0.00339647	-0.00313129	-0.00152252	-0.00356	-0.00322189	-0.00288599	-0.00544942	-0.00570134	-0.00405942	-0.0038296	-0.00321305	-0.00224514	-0.00124628	0.00531697	0.01411	0.0208368	0.0249427	0.0308894	0.0330727	0.033497	0.0338992	0.0341401	0.0355544	0.0385288	0.0406017	0.0405972
		34.647	0.00205113	0.00174416	0.00123581	0.000518723	-0.000743546	-0.00140906	-0.00178234	-0.000483234	0.000130711	-0.000360445	-0.00130837	-0.00200582	-0.000488145	-0.00220719	-0.00161535	-0.000940008	0.000118432	0.00101479	9.63298e-05	-0.000294139	0.00272647	0.000413125	-0.0020623	-0.00150729	0.000255955	0.000651335	0.00333304	0.00130703	0.00157716	-0.00012469	0.000157724	0.000526091	0.00407469	0.00587723	0.00622104	0.0157691	0.0148605	0.0214346	0.0302582	0.0359605	0.0369895	0.0408401	0.0425592	0.0414737	0.0450027	0.0430184	0.04404
		33.029	0.00690527	0.00646922	0.0047441	0.00302612	0.00140584	-0.00130099	-0.00108416	9.5311e-06	-0.00030976	-0.00165364	-0.00391966	-0.00467262	-0.00248523	-0.00293081	-0.0010794	-0.00252574	-0.00236609	-0.00250906	-0.00177516	-0.000431282	-0.00127955	-0.000421751	-0.000552803	-0.00102221	0.000173942	0.00152497	0.00204918	-0.00249476	-0.00107701	0.00012867	0.00012867	0.00242566	0.00627384	0.00950249	0.0123261	0.0179875	0.021526	0.0256863	0.0302255	0.0323914	0.03745	0.0375406	0.0407692	0.0394277	0.039828	0.0405905	0.0395516
		33.665	0.00124223	-0.000518626	0.00131879	0.00525541	0.00484792	0.00753736	0.0065248	0.00486767	0.00231653	0.001383	-0.000175345	0.000461824	-0.00203252	-0.00186952	0.00239309	0.00284503	0.00197078	-0.000150648	-0.00149167	-0.00162503	-0.000898951	-0.00332414	-0.00344763	-0.00368224	-0.00474172	-0.00477383	-0.0025709	-0.00220539	-0.00281787	-0.00484298	-0.00179543	-0.00369212	7.40894e-06	0.00430212	0.00875983	0.0107405	0.0142079	0.0140375	0.0142943	0.0109677	0.0148994	0.0252101	0.0315152	0.0374398	0.0411023	0.0458589	0.0465084
	5	36.825	-0.0147113	-0.0139622	-0.0136515	-0.0155765	-0.0036392	0.00030712	0.00421018	0.00609191	0.00590511	0.00481776	0.000255997	-0.000178551	0.0130624	0.0195196	0.0106733	0.00905116	0.0107599	0.0147298	0.0140003	0.0121933	0.0114402	0.00675651	0.00150458	-0.00267179	-0.0063448	-0.0131756	-0.0148784	-0.0124167	-0.0104445	-0.00882427	-0.0198099	-0.0119054	-0.000418437	-0.000837254	4.36387e-05	-0.0129456	-0.0133094	-0.00614227	-0.00740069	-0.00563694	-0.000709446	0.0172722	0.0372279	0.0706271	0.0719661	0.0728628	0.0834315
		34.949	-0.00307691	-0.00135992	-0.000244121	-0.00397389	-0.00604918	-0.0031707	-0.00267532	-0.00274746	-0.00401236	-0.00148257	-0.00121804	0.00149692	-0.00371658	-0.00149459	-0.000895808	0.000455661	0.00242275	0.0023482	0.00308165	-0.000333096	0.00515694	0.00172537	0.00435616	0.00453892	-0.0011435	0.00231694	0.00475776	0.00126366	0.00191534	0.000902944	0.000854849	0.000265686	0.000366685	0.00342312	0.00543109	0.007314	0.016202	0.0219878	0.0272854	0.0328452	0.0339586	0.0349975	0.0357526	0.043289	0.0448834	0.0470068	0.0440441
		36.23	0.00148649	-0.000517554	-0.000241702	0.00587182	-0.00405175	-0.00476613	-0.00267249	-0.0086587	-0.00744684	-0.00651083	-0.00224103	-0.000206337	0.00166804	0.000675444	0.00274079	0.00498768	0.00871992	0.011627	0.00928105	-0.000234629	0.00172934	-0.000986736	0.00203584	0.00100081	-0.000496334	-0.00205006	-0.0038537	-0.00311103	-0.00360614	-0.00340574	-0.00630335	-0.00696587	-0.0061336	-0.00489345	0.0029742	-0.00470719	-0.00554182	-0.00444784	-0.00137811	0.000335934	0.00435346	0.00842285	0.0144939	0.0246438	0.0281969	0.0339473	0.0387287
		35.254	-0.0047456	-0.00645883	-0.00616997	-0.00718844	-0.0102812	-0.0117529	-0.0132022	-0.0101966	-0.0118351	-0.00444678	-0.0005198	-0.00521375	-0.00880206	-0.00886183	-0.00960887	-0.00995501	-0.00787074	-0.00391388	0.00175122	0.0109349	0.018622	0.02546	0.0206316	0.0172201	0.00917189	0.00740886	0.00381805	0.00501831	0.00449289	0.00844726	0.00804634	0.00781227	0.00919928	0.00788448	0.00683114	0.0109698	0.0160696	0.025216	0.0276713	0.0452891	0.0507675	0.0618935	0.0630763	0.0613556	0.0581956	0.0541939	0.0585866
		34.968	-0.00365711	-0.00139249	0.00131089	-0.00083719	-0.00314752	-0.00273161	-0.00157759	-0.00322064	0.00472724	0.00347039	0.00104123	0.00580128	0.00259745	-0.000761779	0.00222953	-3.09606e-06	-0.0027339	-0.00534815	-0.00269962	-0.00173527	-0.00403417	0.00100696	-0.00516534	-0.00271561	-0.00160044	0.00367834	0.00508145	0.00544708	0.00332414	0.00484379	0.00182962	0.0019256	0.000956683	-0.00107713	0.0038086	0.011224	0.0120147	0.00635201	0.00763629	0.0125517	0.0158812	0.0167793	0.0173072	0.0158812	0.0185184	0.0200746	0.0207213
		38.618	0.00349801	0.00821447	0.00812901	0.00438813	0.00247733	0.00255329	0.000910719	0.00528062	0.00711071	0.00903812	0.00647457	0.00482963	-0.00109502	-0.00626722	-0.00834417	-0.00861714	-0.00833468	-0.00767955	-0.00944318	-0.0130179	-0.011983	-0.00911561	-0.0059088	-0.00331914	-0.00525367	0.000454977	0.00766615	0.00787741	0.00698254	0.0052379	0.00725551	0.01309	0.011642	0.0157318	0.011464	0.0121927	0.0194988	0.0150008	0.018528	0.0361002	0.0626947	0.051294	0.0556449	0.0629083	0.0737915	0.078159	0.0764358
	6	51.792	0.00170485	0.00187194	0.00305387	0.0041154	0.00439553	0.00314725	0.000481144	0.00089396	0.00506144	0.00267546	0.0025526	0.00331188	0.00242236	-0.000214256	-0.00242823	-0.00156082	-0.00125367	-0.000730276	-0.00247983	-0.00153134	-0.00237171	0.000827615	-0.0025216	-0.00251423	-0.00031746	-0.0020449	-0.00114309	-0.00228571	-0.00562019	-0.00403035	-0.00346764	-0.00156082	-0.00206702	-0.000484552	0.00301702	0.00574947	0.00493366	0.00907903	0.0142368	0.0226577	0.0214783	0.0272356	0.0227781	0.0304447	0.0308109	0.0328307	0.037556
		34.871	0.00973878	0.00848401	0.00730242	0.00597449	0.00584169	0.00483626	0.00300154	0.00103402	0.00256521	0.00104215	-0.00172754	0.00139717	-0.000632671	-0.00133458	0.000120729	-0.00109338	0.00015054	-0.00292539	-0.00288474	-0.00178445	0.000868709	-0.000716683	-0.00334274	-0.00220722	-0.00237796	-0.00578452	-0.00657586	-0.00632382	-0.00564631	-0.00342947	-0.00357039	-0.00281699	-0.00096872	0.000971692	-9.60764e-05	0.00376578	0.00583898	0.00597178	0.00809105	0.0175682	0.0227878	0.0299126	0.0321023	0.036368	0.0405388	0.0440266	0.0451621
		38.103	0.00434261	0.00228224	0.0019879	0.00223395	0.00134633	0.00114857	0.000658776	-0.000663449	-0.00149588	-9.31678e-05	-0.000113863	0.000233364	0.000992207	0.00107039	-0.00194658	-0.00258815	-0.00301816	-0.00239959	-0.00201097	-0.00403915	-0.0018477	-0.000665749	0.000125287	0.000270157	0.00195571	0.000162079	0.0010474	-0.000688744	0.000891028	0.00049781	0.000325345	-0.00243408	-0.0013947	0.00413565	0.00280883	0.00173725	0.0053843	0.00684449	0.00374704	0.00879679	0.0122806	0.0176178	0.0237483	0.0259397	0.0323094	0.0357449	0.0367222
		38.297	0.00975109	0.0103409	0.00987188	0.00529811	0.00580736	0.0088368	0.00784199	0.00923236	0.00401196	0.00561077	0.00474622	0.00382247	0.000859345	-0.000377067	-0.00405077	-0.00658044	-0.00222695	-0.00485373	-0.00736682	-0.00956488	-0.0107089	-0.00473767	-0.00396077	-0.00620383	-0.0066136	-0.00584854	-0.00605461	-0.00553352	-0.00421184	-0.00511664	-0.00653544	-0.0031128	-0.00567563	-0.00434211	-0.00369785	-0.00401051	-0.00112791	0.00247	0.00537154	0.00886997	0.0152889	0.0241072	0.0272338	0.0392544	0.0435511	0.0464952	0.0448728
	7	34.935	0.0562324	0.0341578	0.0275015	0.0445294	0.0726098	0.0451992	0.00549031	0.0161624	0.00569151	0.0123009	0.0521449	0.00661209	0.0151729	-0.0302496	-0.035175	-0.0330279	-0.030211	-0.0104958	-0.00880071	-0.0321266	-0.0362058	-0.0216668	-0.035842	-0.0309166	-0.022229	-0.0170969	0.00988097	0.000986639	-0.0192247	-0.0162921	-0.025112	0.0181496	0.0151426	0.0405384	0.0459544	0.0650357	0.0779211	0.0564915	0.0490414	0.0690709	0.1001	0.104659	0.122258	0.141863	0.163245	0.191274	0.203823
		35.506	0.0165669	0.00569852	0.0231381	0.0148256	0.00843455	0.000179466	0.00300948	0.0146689	0.0149326	0.00958066	0.0065209	0.00499624	-0.0132344	-0.0229802	-0.0235807	-0.0193983	-0.0171609	-0.00520905	0.00287111	0.00215578	0.00270142	0.00491269	0.00202002	0.0105362	0.00568286	0.00125247	-0.00593222	-0.00818005	-0.00948019	-0.0130125	-0.0165161	-0.0182444	-0.00537353	0.00455242	0.0223784	0.0201828	0.0206031	0.0201488	0.0415384	0.0304037	0.040079	0.0513077	0.0523964	0.0543727	0.0677318	0.0584037	0.0665569
		36.092	-0.00461084	-0.0100896	-0.00487618	0.00432797	-0.00942944	-0.00382543	0.0149353	0.00231138	-0.00515426	-0.0192513	-0.0108814	-0.00625808	-0.0115734	-0.00554697	0.00275715	-0.00199989	-0.00536229	-0.0015435	0.00166607	-0.004579	0.00459756	0.00805549	0.00563557	0.0235981	0.0218129	0.00645283	0.00262554	0.00381852	0.00277201	-0.00193196	0.0114327	0.0154659	0.00113751	-0.0103422	-0.00645762	-0.00120174	-0.00475094	0.00178919	0.00365507	0.00348313	0.0317303	0.0377546	0.0585786	0.0677021	0.0621129	0.0653989	0.0776067
		34.025	-0.000200814	3.29204e-06	-0.00258364	-0.00198556	0.000907531	0.0013727	-0.00332412	-0.00257652	-0.00327428	4.6012e-05	9.11052e-05	0.00272313	0.00224609	-0.000298121	0.000375905	-0.00215406	-0.00103385	-0.000293374	-0.00092468	-0.00125695	-0.000948413	0.00101196	0.0012042	-0.000431027	0.000202652	0.00575624	0.0023695	0.000829211	0.00181414	-0.000862973	0.00171209	0.00298182	0.00459331	0.00531718	0.000572891	0.0022366	0.00464078	0.0062855	0.00192569	0.0056352	0.00372467	0.00867069	0.00762168	0.0129095	0.0116065	0.0148841	0.0128525
		419.876	0.00132838	0.00325893	0.00241071	0.00279986	0.0044811	0.00309172	0.000449758	0.00272081	0.00260528	0.00371497	0.0046392	0.00305828	0.0018513	-0.000243415	0.00020958	-0.00156287	-0.00397074	-0.00268776	-0.00312555	-0.00197635	-0.0013227	-0.00425348	-0.00289754	-0.0032502	-0.00154159	-0.00084538	-0.00209187	0.000553126	-0.00556382	-0.00421396	0.00237422	0.000939235	0.0028029	0.00680688	0.00984711	0.00575192	0.00182698	-0.00588	-0.00306171	-0.00585872	-0.00743052	-0.00216788	-0.00195202	-0.00202803	-0.00365455	-0.00114028	0.00184826
	8	43.709	-0.0219536	-0.0243735	-0.0175796	-0.0250705	-0.0284287	-0.0287078	-0.0498096	0.00692152	-0.00157534	0.00189344	-0.0292793	0.00970646	-0.0236649	-0.0176903	0.0158924	0.00110223	0.0145842	0.0231851	0.0244339	-0.0462169	-0.0197138	0.0493662	0.0508049	0.0520603	0.0155654	0.0334693	0.00784983	0.0430101	0.0031356	0.00945704	-0.0265109	0.00819341	0.00728492	-0.00279106	-0.0191241	-0.0198096	-0.0194181	-0.0238862	-0.0112268	-0.0510715	-0.0477134	0.0485072	0.0300616	0.0381703	0.0988541	0.108274	0.1428
		37.397	-0.00338811	0.0146194	0.0270866	0.0223077	0.00751417	0.0366724	-0.0118078	0.00737791	-0.036131	-0.0403649	-0.0300517	-0.0670284	-0.0303663	-0.0281121	-0.0213836	0.0193341	0.0219771	0.01498	0.00608952	0.00380928	-0.0141782	-0.0239223	-0.0229705	-0.000444633	-0.0164684	0.00621174	0.0320618	0.0722906	0.0575933	-0.00922296	0.00591519	0.0266117	0.0281966	0.0505742	0.0428699	0.0784441	0.0990384	0.0325708	0.045092	0.0759354	0.0825757	0.11055	0.116008	0.123949	0.156187	0.156776	0.140123
		38.217	0.0111448	-0.0102828	0.058055	0.0701688	0.0299081	0.0909552	0.182126	0.100546	0.0283907	0.0516108	0.0176969	-0.0221807	-0.0365738	-0.0452824	-0.0603484	-0.0420973	-0.0171693	-0.0541264	-0.060632	-0.0318713	-0.0645154	-0.0532969	-0.0981817	-0.0203946	0.0123321	0.0302107	-0.013324	-0.00283975	-0.0164095	-0.0501033	0.00768255	0.0226893	-0.0284598	-0.0180158	-0.00166096	0.0441	0.0120993	0.0614813	0.117121	0.0863183	0.110146	0.0940048	0.0923731	0.0777177	0.0886378	0.0746088	0.0708206
		36.378	0.00708779	0.00291646	-0.00190689	-0.0142297	-0.00806831	0.00177478	-0.00430023	-0.00311927	0.00156791	0.00449282	0.00419954	-0.00962634	-0.0242849	-0.0364428	-0.0541153	0.0183815	-0.00838253	0.0263209	0.0246739	0.0372821	0.0217018	-0.00828303	-0.0119437	-0.00911048	0.00204187	0.0110706	0.0167842	0.0122437	-0.00643958	-0.00537645	0.0113455	0.0514327	0.0759422	0.0879666	0.0392722	0.0565101	0.0594978	0.0147811	0.0522078	0.0439882	0.0549023	0.0617498	0.0564446	0.0876838	0.114377	0.104893	0.116244
	9	33.84	-0.00549953	0.00777089	-0.00828664	-0.0158141	0.0127867	0.01951	0.0138018	0.0130572	-0.0023724	-0.010076	-0.00380443	-0.00330806	0.00816302	-0.000550729	0.00333832	-3.69875e-05	-0.00473512	-0.0107188	-0.00281169	-0.0111482	-0.0244683	0.00073983	-0.007006	-0.00138959	-0.00278687	-0.00404517	0.0102676	0.0152363	0.000303025	0.00203287	0.011851	0.00944366	0.0232253	0.0206765	0.0638432	0.0826531	0.0742645	0.087453	0.100736	0.112693	0.114763	0.113875	0.120931	0.120533	0.121757	0.130649	0.14317
		322.572	0.00493529	0.0178431	0.0169477	0.0152864	0.0252156	0.0280596	0.0167873	0.0205499	0.00541144	0.00863063	0.0116557	0.00723065	0.00697704	0.00667945	0.00859699	0.000525735	-0.000185902	-9.79178e-05	-0.00899208	-0.00289012	-0.00629045	-0.0175731	-0.00675107	-0.00873589	-0.0259756	-0.0218533	-0.0271634	-0.0255771	-0.020857	-0.0192655	-0.00912406	-0.0166778	-0.00413743	-0.00223024	0.00564693	0.00690717	0.0216833	0.0244238	0.0293975	0.043431	0.0305335	0.0380432	0.0332662	0.0322777	0.0352174	0.0338329	0.0336673
		34.402	0.00908408	0.0139431	-0.0086216	-0.0046897	-0.0231721	0.0139771	0.0229355	-0.00866772	-0.019762	0.00543373	0.00127368	-0.00767989	-0.00818958	-0.0263273	-0.0171431	-0.0351255	-0.0261355	-0.00775998	-0.00363877	-0.0103497	-0.0129758	-0.0158349	-0.0144539	0.00140474	-0.000842751	0.0119456	0.0400611	0.0459905	0.0413863	0.0143169	0.0296173	0.0208895	0.0119481	0.0394689	0.062189	0.0444469	0.0644778	0.0648976	0.0857027	0.0968358	0.0997775	0.0974402	0.113046	0.104916	0.0986683	0.0939476	0.0884332
		34.616	-0.0175499	-0.0166596	-0.0215754	-0.0216236	-0.0109426	-0.00882995	-0.0106346	0.00635299	0.00903106	0.0139252	0.017893	0.0230735	0.0104772	-0.0111254	-0.024843	-0.0143593	-0.0173358	-0.00156331	0.00645886	0.0131793	0.0222915	0.0273589	0.009943	0.00646127	-0.00279287	0.0035883	0.0165046	0.0054988	-0.0107645	0.00563114	0.0115046	0.0198853	0.0175561	0.0211967	0.039948	0.0565193	0.0819236	0.0910358	0.0953332	0.110747	0.0971859	0.0957615	0.0861368	0.0781146	0.0894549	0.0829751	0.0777561
		39.087	0.0065385	0.00997553	0.00772727	0.000954594	0.00414322	0.00203944	0.00404184	0.00603663	-0.000436947	-0.000862773	0.00119539	-0.00428206	0.000110545	0.001094	-0.00131648	-0.00146349	-0.00364332	-0.00525791	-0.00833502	0.000130822	0.00401903	-0.00267507	-0.0024723	-0.00319975	-0.00498417	-0.00794468	-0.00838571	-0.00207182	-9.22297e-05	0.0109869	-0.00156995	9.02674e-05	0.00635854	0.00603917	0.00632812	0.00159333	-0.00193748	-0.0149404	-0.0081804	0.00433333	-0.000117577	-0.00268521	-0.00583329	-0.00182595	-0.00395509	-0.00670015	-0.00796749
	10	41.14	-0.0316025	-0.0195281	-0.0258666	-0.0257502	-0.0165167	-0.015966	-0.0226641	-0.0117514	-0.00933441	-0.0190792	-0.0217538	-0.0138899	-0.015301	0.00223294	0.00192537	0.0239337	0.0142242	0.0227034	0.0159866	0.00933629	0.0102341	-0.010386	0.0113979	0.015733	0.017699	0.0215146	0.0172127	0.0145194	0.0159367	0.0185636	0.0262363	0.0231855	0.0283042	0.0304281	0.0292955	0.0286242	0.0299543	0.0220155	0.0214253	0.0302473	0.0396679	0.0325936	0.0415154	0.0483257	0.0448634	0.0538662	0.0646833
		37.002	0.0045432	0.00820491	0.0161198	0.0215115	0.00682041	0.00474478	0.00370365	-0.000321345	0.000850488	0.0014065	0.00181409	0.0113261	0.00357738	-0.00102799	0.0110669	-0.00213337	0.00717927	0.00409795	-0.00320773	-0.00525013	-0.00558906	-0.00204919	0.00391188	-0.00719507	-0.0138827	-0.00933494	-0.0096074	-0.0137498	-0.0184704	-0.0114792	-0.00895392	0.00894921	-0.000374509	-0.00694032	0.00504605	0.0105552	0.0308729	0.0300954	0.0623263	0.0292226	0.0276498	0.049764	0.0452915	0.0591675	0.0716855	0.0844538	0.099774
		36.371	0.0131693	0.0112892	0.0125899	0.00320883	0.00965138	-0.00584361	-0.00619735	-0.00125054	0.00803587	0.012044	0.0122501	0.00112538	0.00657634	0.0171663	0.0129186	0.01159	0.00133707	-0.00528932	-0.00409997	-0.00581297	-0.0156815	-0.0134894	-0.00915262	-0.00992974	-0.00413339	-0.00870418	-0.0162609	-0.00883788	-0.0182441	-0.012665	-0.000417715	0.00313363	-0.00545644	-0.00238975	0.00669611	0.0169045	0.0282883	0.0440172	0.0492091	0.0383601	0.0399367	0.0528301	0.0636429	0.0766478	0.0773803	0.0862434	0.0979837
		34.411	-0.00890062	-0.00717932	-0.0192552	-0.0142203	-0.0134145	-0.00573314	-0.00688473	-0.00364664	-0.00492483	-0.00576235	-0.00460102	-0.00741792	-0.0112038	-0.00274825	-0.00799736	-0.00684821	-0.00191073	-0.0018523	0.00559043	0.00252277	4.91643e-05	0.0148981	0.0204248	0.0213207	0.0172256	0.0120788	0.0148981	0.000984071	0.00871166	0.0109491	0.00484787	0.00236695	0.0221972	0.0207364	0.0380322	0.0286685	0.0531027	0.0476052	0.043498	0.0569543	0.0653173	0.0836065	0.0858488	0.0992175	0.100116	0.112046	0.118692
		34.199	0.000883114	-0.000452597	0.00624258	-0.000120055	0.00367647	0.0062121	0.0072984	0.00448011	0.00939065	0.00697417	0.0061927	0.000497919	-0.00069369	0.00208581	9.05551e-05	-0.00132829	0.0054334	-0.000211504	0.00261233	0.00341043	0.00477108	-0.00393875	-0.00903218	-0.00976377	-0.012765	-0.0133829	-0.00293281	-0.00221784	-0.00317667	-0.00697319	-0.00326258	0.00260956	0.00601257	0.00360996	0.00194448	0.0158143	0.0168507	0.0256686	0.0244853	0.0304433	0.0261923	0.0415918	0.042958	0.0484976	0.0469956	0.0505815	0.0544279
	11	40.139	0.0197737	0.0209768	0.0156053	0.013192	0.0139167	0.0134667	0.0144283	0.00994731	0.00764525	0.00373744	0.0052982	0.00279957	0.00107539	0.00130039	-0.00221191	-0.002489	-0.00378213	-0.00447607	-0.00801915	-0.00803573	-0.00817783	-0.0126967	-0.0127583	-0.00812573	-0.00944017	-0.0113964	-0.0129856	-0.00949938	-0.00965096	-0.00872019	-0.0106978	-0.00875334	-0.0145914	-0.00830098	-0.00499474	-0.00156771	-0.00233743	-0.00235401	0.00292983	0.000589877	0.00764999	0.00652738	0.0121381	0.0174385	0.0243494	0.0262772	0.0398953
		39.865	0.00543465	0.00561339	0.00100023	0.000733257	0.00301382	-0.00118305	-0.0027894	0.000330538	0.00355681	0.00192557	0.000156329	0.00173327	-0.00123961	0.0033283	0.00566995	0.0027559	0.00424234	0.000812443	1.83186e-05	-0.00303827	0.00209073	-0.00250885	-0.00446136	-0.00578037	-0.00621024	-0.000920603	9.52424e-05	-0.00487991	-0.0077917	-0.00627133	-0.00562879	0.000479861	-3.14555e-05	0.000778506	0.000362213	0.00557266	0.0133012	0.0116791	0.0201112	0.0356091	0.0346317	0.0400028	0.0498151	0.0729873	0.0812091	0.0935644	0.107347
		39.576	0.0153683	0.0154742	0.0175372	0.0200027	0.0149393	0.0105458	0.00883238	0.0121136	0.0107497	0.00850929	0.00937263	0.0117455	0.00966129	0.00420587	0.00206342	0.00196544	-0.000958244	-0.0015594	-0.00227708	-0.00575689	-0.00600318	-0.0139294	-0.0156084	-0.016432	-0.0146604	-0.0141625	-0.0139374	-0.0145783	-0.0150179	-0.0184871	-0.0197185	-0.0192286	-0.0204097	-0.0169855	-0.0185639	-0.0179601	-0.015386	-0.0153251	-0.0139135	-0.0146233	-0.00760008	0.00596696	0.0110834	0.0161628	0.0157073	0.0254714	0.0305826
		36.302	-7.52843e-05	-0.00036873	-0.00258792	-0.0039451	0.000809639	-8.6747e-05	-0.000549841	0.00110538	0.00340709	0.00347587	0.00151804	-0.000139476	-0.00138891	-0.00058423	0.000811931	0.000518485	0.00141946	-0.00352786	1.64176e-05	-0.000304539	-0.000948744	-0.00139579	-0.00084558	0.00152033	0.00188255	-0.000428336	-0.000437507	-0.000146353	-0.000382485	1.87101e-05	0.00163954	0.00268494	-0.000295369	-0.00218213	-0.00535273	-0.00475437	-0.00420875	-0.00353474	0.000403858	-0.000916649	0.00302653	0.00627736	0.0109587	0.0171738	0.0160207	0.0212431	0.0236549
	12	35.403	-0.0204594	-0.00111743	-0.00878751	0.00909544	-0.00139302	-0.019452	-0.0205034	-0.0228956	-0.025802	-0.0136577	-0.023734	-0.0288543	-0.0175947	-0.0194265	-0.0121756	-0.00893341	0.00460965	0.030517	-0.0101307	-0.019269	-0.0110732	0.018382	0.0222633	0.0282058	0.0404751	0.0361329	0.0243291	0.0295791	0.0113974	0.0137179	0.0165548	0.0310798	0.0765907	0.0574688	0.049192	0.0921648	0.0752429	0.103503	0.146017	0.14115	0.200887	0.188858	0.137532	0.183668	0.186218	0.189078	0.190778
		38.186	0.0472714	0.03967	0.0299407	0.00933693	0.0137937	0.0108959	0.0129997	0.0146942	-0.000506189	0.0239564	0.030788	-0.00630651	0.00704924	0.00249323	-0.009732	-0.0169437	-0.01652	-0.0204975	-0.000123697	-0.00518082	-0.00844895	0.0105522	0.00239155	-0.00722643	-0.0306698	-0.0254699	-0.0107245	-0.0412513	-0.0581318	-0.0563137	-0.0516028	-0.0355091	-0.0520579	-0.0551493	-0.0554059	-0.0582867	-0.0374167	-0.0374941	-0.00594823	-0.0070376	-0.0119785	0.000638867	-0.0142856	0.000304791	-0.0027503	0.0208383	0.0171514
		39.017	-0.012968	0.00334	0.00427557	0.00445876	0.0130511	-0.00581719	0.00708662	0.0163529	0.0123424	0.00326586	0.0108616	0.0304779	0.0195826	-0.0105473	0.0160039	0.0101877	0.00239136	-0.0168564	0.000740488	-0.00690759	0.0100024	0.0032615	-0.0223804	-0.0313871	-0.0148588	-0.0250759	-0.0268205	-0.0113673	-0.0176001	0.0104756	0.0244284	0.0367063	0.0340631	0.023519	-0.000441507	0.0334111	0.035256	0.0425487	0.0817289	0.086784	0.0915709	0.121147	0.112073	0.10546	0.144874	0.172128	0.178142
		34.585	-0.0282498	-0.0293909	-0.0234328	-0.00346134	0.0115218	0.0124374	0.0133484	0.0102905	0.00552988	0.00764971	0.0199853	0.0116909	0.0127689	0.00924635	-0.0023022	0.00340329	0.0167108	0.0134522	0.00177057	0.0035183	3.4118e-05	0.00269743	0.0140182	0.00391295	0.00710171	0.00481275	-0.0118347	-0.0151407	-0.0151926	-0.0190195	-0.0193443	-0.00871807	-0.00435212	-0.0141484	-0.0164081	-0.0178108	-0.013296	-0.00773483	-0.00206316	-0.000899508	0.0171461	0.0329997	0.032154	0.0522202	0.0488623	0.0504206	0.0673364
		34.496	-0.00207831	-0.00445498	-0.00403986	-0.00469903	-0.000112204	0.00257922	0.00425566	0.00860756	0.00768837	0.00830648	0.0057884	0.00331594	0.000864008	0.00029151	-0.000766813	-0.0019962	-0.00152862	-0.00151722	-0.000290112	-0.00164495	-0.00148301	-0.00152634	-0.00301575	-0.000924193	-0.00270327	-0.00423601	-0.00336016	0.00087085	0.00130422	-0.00145564	-0.00281047	0.000932434	0.00217323	0.00229183	0.00523415	0.0015802	0.00694936	0.00563558	0.00889951	0.0116981	0.0159132	0.012225	0.0127815	0.0105942	0.0115795	0.0115704	0.0109842
	13	37.258	0.013741	0.00691656	-0.0121984	-0.00505861	0.00489459	-0.00532038	-0.0158383	-0.0405348	-0.0513331	-0.0564117	-0.040271	-0.0260595	-0.00348803	0.0205097	0.0271466	0.00633119	0.00841912	0.0309308	0.019069	0.0294571	0.0511773	0.038658	0.0235478	0.0247598	0.00679907	-0.00863055	-0.00958898	-0.00644163	-0.00431042	-0.00235441	-0.0245177	-0.0585182	-0.0628053	-0.0624755	-0.0655734	-0.053996	-0.0522647	-0.0394115	-0.0137937	0.0456555	0.105902	0.147216	0.236077	0.288836	0.314489	0.316086	0.293523
		49.183	0.00524462	-0.00607795	0.00545743	0.0039559	0.0148095	0.0367098	0.0440066	0.0286937	0.0329954	0.0320771	0.0230246	0.0245911	0.0145632	0.00695502	0.00162084	-0.00838149	-0.0435512	-0.0440931	-0.04657	-0.0137255	-0.00405621	-0.00925639	-0.00352417	0.0260513	0.0209043	-0.00692331	-0.015296	-0.0269812	-0.0463316	-0.0480617	-0.063144	-0.0483337	-0.0485012	-0.0568443	-0.0506057	-0.0437562	-0.0582769	-0.0622652	-0.0483297	-0.0232727	0.0194757	0.0241005	0.0306899	0.0518571	0.0430864	0.0489092	0.0280238
		39.321	0.03921	0.020681	0.00277238	-0.00720716	-0.0304861	-0.0451672	-0.0321868	-0.0398695	-0.0619846	-0.0437108	-0.0180645	-0.00450767	0.0243859	0.0509914	0.0158716	0.0273582	0.0197239	0.0268698	0.0221638	0.0265002	0.0232947	0.0137331	0.00900299	0.00803275	0.00121472	-0.0262752	-0.0267108	-0.0176025	-0.00320302	0.0199792	0.00519026	-0.0130198	-0.0366661	-0.0415877	-0.0397748	-0.0205374	-0.00434706	0.0533015	0.0958663	0.142952	0.241146	0.300467	0.413016	0.431551	0.403443	0.386415	0.406437
		37.21	0.0156638	0.0129668	0.00561266	-0.0102284	-0.0228446	-0.0218546	-0.0108774	0.00894323	0.00850546	0.0127952	0.0351478	0.0255037	0.0213548	0.0227187	0.0231498	0.00609443	0.00353821	0.00273526	0.0103863	0.0136795	-0.00916591	-0.00825298	-0.0102658	-0.0176353	-0.0246484	-0.0323633	-0.0293363	-0.0232801	-0.0151957	-0.00262357	0.00016584	-0.0198022	-0.0350471	-0.0383117	-0.0349063	-0.0313734	-0.00477722	0.00755733	0.0107999	0.049372	0.0927288	0.103578	0.102105	0.102505	0.0991898	0.109289	0.116338
	14	34.04	0.0018434	0.00130145	-0.000242096	0.000119203	0.00250779	0.00167279	-0.00155281	-0.00474429	-0.000201952	-0.00286152	-0.00149661	0.000267737	0.00508907	0.00241145	0.000635058	-0.00267685	0.000211535	0.00115493	-0.000155786	0.000598928	0.00278077	0.001731	0.00227295	0.000685238	-2.53169e-05	-0.00339744	-0.006888	-0.00578403	0.000924097	0.00143995	0.00159049	0.000707318	0.00265633	0.00114891	0.00308587	0.00365191	0.00768842	0.00924803	0.0118173	0.0119979	0.0141758	0.0155025	0.0190774	0.020368	0.0221685	0.022309	0.0214399
		34.484	0.000454051	-0.00175906	-0.00163816	0.000476256	0.000303549	0.00149522	-0.0015	0.00460887	0.00494688	0.00204048	-0.00074009	-0.000367538	0.000841406	-0.000165225	-0.000996683	-0.000291054	0.000199925	-0.000212102	-0.00203292	0.00114241	-0.00171465	0.00292869	0.00198867	0.000545338	-0.00108304	-0.00204032	-0.00200825	-0.00300008	-0.00118419	0.000932694	-0.00257078	-0.00394256	-0.00413994	-0.00244988	8.64328e-05	-0.00207733	0.00399206	0.00704896	0.0080778	0.00817649	0.0131356	0.0111569	0.0146702	0.0154992	0.01902	0.0184328	0.0222841
		33.554	0.00355929	0.00369444	0.00341771	0.00630519	0.00722121	0.00615074	0.00568308	0.00441524	0.00506739	0.0029908	0.00344559	0.00499231	0.00255103	0.00161142	-0.000941413	-0.00201618	5.39769e-05	-0.000909234	-0.00224572	-0.000265663	-0.0036723	-0.00416999	-0.00388468	-0.00507743	-0.00372807	-0.00683009	-0.00530268	-0.00502594	-0.00565235	-0.00519542	-0.00624229	-0.00651045	-0.00429656	-0.00519542	-0.00459046	-0.00153779	-0.00307378	-0.000209887	-0.00230149	-0.00246882	-0.000947848	0.000513057	0.00306589	0.00310879	0.00653473	0.00776181	0.00764168
	15	35.036	-0.0165257	-0.0161822	-0.00134504	-0.0127563	-0.0272155	-0.0141266	0.0263061	0.039708	0.00764235	-0.00857274	0.008902	0.0367688	0.0327857	-0.00115228	0.0280486	0.0267623	-0.00464303	-0.0186766	-0.000394579	-0.0283988	-0.0389913	-0.0109508	-0.00255888	0.0128317	0.0224375	0.0369177	0.00990209	0.00159795	-0.0323954	-0.0297215	-0.0260036	0.00436536	0.00541507	0.0188589	0.0178302	0.0595055	0.0863016	0.123566	0.120518	0.161991	0.167379	0.207819	0.229184	0.25585	0.28657	0.277234	0.291481
		36.044	0.0619829	0.0887969	0.0666111	0.0282817	0.012473	0.0085646	0.00239937	0.0316756	-0.00889778	-0.0365116	-0.0484594	-0.04034	-0.00807417	-0.00592325	0.00279497	-0.0235413	-0.0163492	0.014237	-0.01398	0.0493887	0.0369523	0.0324667	0.00390393	-0.0677398	-0.0226161	-0.00414632	-0.0176506	-0.0287813	-0.0268703	-0.0416911	-0.0289564	-0.00172519	0.0608134	0.0656362	0.0185215	-0.000482203	-0.0144253	-0.0470197	0.0276699	0.0793739	0.141755	0.125648	0.169794	0.249283	0.294722	0.310648	0.357194
		36.257	-0.00571083	-0.0153777	-0.00274991	-0.00843672	-0.0389267	-0.0116305	0.000586614	-0.0130011	-0.00269939	0.00361343	0.014495	0.01511	0.0035695	-0.0156831	-0.0196522	-0.0281725	-0.0103653	0.0273733	-0.0229426	-0.00682666	-0.00568008	0.00579019	0.000101182	0.0179084	0.0277796	0.0427116	0.0393641	0.0200259	0.00390557	-0.0218597	0.0183345	0.0500941	0.026275	0.0150112	0.0105808	-0.0246032	-0.000162401	-0.00946689	0.0157273	0.0248604	0.0301299	0.0356673	0.0608593	0.0800921	0.0998103	0.121863	0.157034
		33.593	-0.00144256	0.00756918	0.0103833	0.00672331	0.000394283	-0.018653	-0.00567742	-0.0245714	-0.0241471	-0.00100456	-0.0101751	-0.0176703	-0.0063262	0.007008	0.00457439	-0.00539546	-0.00681894	-0.0155734	-0.0140486	-0.0115575	-0.0144921	-0.00585535	0.00102116	0.00961133	-0.0040103	0.0209171	0.0228689	0.034577	0.0180811	0.00739125	0.0362989	0.0269888	0.0093896	0.0295018	0.0238626	-0.00881182	0.0170956	0.0050863	0.00825081	0.0160827	0.014495	0.0350862	0.0237722	0.0345414	0.0415192	0.0333096	0.0465972
		36.681	0.0115079	0.0161642	0.0231684	0.0287466	0.0382826	0.0361816	0.0136903	0.0043119	0.00138887	0.00236584	-0.00192285	-0.00168648	-0.00295234	-0.00669739	-0.00805254	-0.0110202	-0.0106105	-0.00629294	-0.0130529	-0.0153929	-0.0168348	-0.0144501	-0.0207978	-0.0116873	-0.00673153	-0.00377436	-0.00274487	-0.00492204	-0.0119814	-0.0122808	-0.0189857	-0.0158499	-0.0123018	0.000994929	-0.00100628	-0.00402386	-0.0148756	-0.00852789	0.0122984	0.00998725	0.00431452	0.017866	0.021422	0.0308713	0.0375945	0.0335159	0.0424531
	16	35.758	0.00430085	0.00268649	0.00594093	0.00643524	0.00306651	0.00293793	0.00137214	0.000897831	0.000414951	-0.00185659	-0.00229375	-0.00413955	-0.00159086	-0.000893684	-0.00329666	-0.00207946	-0.00117084	0.000263515	-0.000705103	-0.000576526	-0.000533666	0.000743538	0.00257506	0.00173216	-0.0011737	-0.00132228	-0.00230518	-0.00257091	-0.00514246	-0.00650253	-0.00705684	-0.00446814	-0.00286235	-0.00293378	-0.00393669	-0.00176515	-0.00116513	0.00088926	0.00529519	0.0115155	0.0166472	0.0202102	0.0262276	0.0296164	0.0300078	0.0322736	0.0332022
		34.552	-0.00960397	-0.00688682	-0.0094001	-0.00190706	-0.00589755	-0.0104796	-0.00686677	-0.00930318	-0.00412289	-1.54169e-05	0.0101012	0.00135485	-0.00244848	-0.00652587	-0.00124198	0.00130472	0.0010574	-0.00113169	-0.00327065	0.0127548	0.00811597	0.00278863	0.007872	0.00924895	0.00784192	0.00842345	0.00713004	0.00666883	0.00357737	0.00134817	-0.000767395	0.00206338	0.00639143	0.00743083	0.00620762	0.00775836	0.0115851	0.0158062	0.0203582	0.0252845	0.0287736	0.0321592	0.0354679	0.0406114	0.0440471	0.0449395	0.0448459
		33.396	0.00169358	0.00151743	0.00242128	0.000752196	0.00197946	0.00188994	0.00152032	-0.00147999	-0.0027188	-0.00333388	-0.00260041	-0.00220768	0.00047209	-0.000460633	-0.00015165	-0.000934214	-0.000160313	-0.00251955	-0.000752289	0.000668453	-0.00101796	-0.00101218	-0.00210373	-0.000862021	0.000356583	0.00124599	0.00128642	0.00143947	0.00145679	0.00191882	0.0017369	0.00294684	0.00466213	0.00521079	0.00507795	0.00707046	0.0113731	0.0184306	0.0248673	0.0300969	0.0362621	0.0397793	0.0437499	0.0480583	0.0476973	0.048168	0.0502096
		33.373	-0.00181097	-0.00135319	-0.000265197	0.000838476	-0.000309093	-0.000315364	0.000214525	-6.76647e-05	-0.000578741	-0.0029021	0.000550016	0.00119905	-0.000588147	-7.39356e-05	0.000901185	0.00256924	0.00271033	0.001522	0.000289775	0.000872966	-0.000704158	0.00175089	0.00145302	0.000198847	3.58047e-05	0.00173835	-7.08002e-05	-0.00228128	-0.0023534	-0.00242865	-0.000741783	-0.000729242	-0.00147861	-0.000456459	-0.000472136	-0.00261364	-0.00357308	-0.00147861	-2.69041e-05	0.000465359	0.00226196	0.0030615	0.00451007	0.00374816	0.00630668	0.00528766	0.00683657
[truncated: 384 more columns]

## Sheet: Figure 7j
Group	Treatment	Mouse #	Time
			baseline	1min	2min	3min	4min	5min
AgRP	Saline	1	2.976e-05	0.0278	0.0594	0.085	0.1024	0.1016
		2	-9.5229e-05	0.0114	0.0226	0.0336	0.0495	0.0535
		3	2.0456e-05	0.0070814	0.0119	0.0221	0.0296	0.0321
		4	-6.6431e-05	0.0057514	0.0104	0.016	0.0244	0.0256
	CNO	1	-0.00012219	0.0208	0.0559	0.0928	0.1307	0.1705
		2	-4.4357e-05	0.0074693	0.0174	0.0286	0.0437	0.05
		3	-6.4464e-06	0.0097667	0.0165	0.0291	0.04	0.0459
		4	-1.8796e-05	0.0032987	0.0079818	0.0128	0.0204	0.0196
POMC	Saline	1	-0.00011453	0.0105	0.0245	0.0395	0.0478	0.0543
		2	-7.4231e-05	0.0252	0.0412	0.0576	0.0708	0.08
		3	-5.2229e-05	0.0066329	0.0081214	0.0093681	0.0092592	0.0085551
		4	-0.00020076	0.0275	0.0385	0.0433	0.0355	0.0324
		5	-0.00015289	0.0162	0.026	0.0378	0.0476	0.0514
		6	-7.4679e-05	0.0377	0.0696	0.1107	0.1374	0.1571
		7	-0.00015775	0.0365	0.0714	0.1101	0.1668	0.1473
		8	-4.8315e-05	0.0104	0.0171	0.0201	0.0251	0.0225
	CNO	1	8.2207e-06	0.0085441	0.0148	0.0287	0.0343	0.0377
		2	-1.943e-05	0.0194	0.0409	0.0671	0.0822	0.0902
		3	8.6874e-06	0.004509	0.0078429	0.011	0.0136	0.014
		4	-0.00013252	0.032	0.0431	0.0484	0.0448	0.0425
		5	-0.00010255	0.0089713	0.0194	0.0277	0.0462	0.0473
		6	-0.00017498	0.0251	0.0527	0.0874	0.1368	0.1587
		7	-7.6955e-05	0.0304	0.0668	0.0928	0.1308	0.1396
		8	5.5998e-05	0.0061884	0.0117	0.0165	0.0211	0.0229

## Sheet: Figure 7l-n
Treatment	Mouse#	latency to feeding onset (s)	dF/F
			time (s), food presented at 30s
			1	2	3	4	5	6	7	8	9	10	11	12	13	14	15	16	17	18	19	20	21	22	23	24	25	26	27	28	29	30	31	32	33	34	35	36	37	38	39	40	41	42	43	44	45	46	47
Saline	1	36.286	-0.00374357	-0.00402808	-0.00467533	-0.00383841	-0.00205549	-0.00219063	-0.00323383	-0.00166192	-0.00194406	-0.0015908	-0.00160265	-0.00190375	-0.00412054	-0.00315322	-0.00252493	9.49124e-05	-0.00192272	-0.00135608	0.000253762	0.00123294	0.00113099	7.64818e-08	0.00179722	0.00293051	0.00514018	0.00458776	0.00553612	0.0050572	0.00455931	0.00571868	0.00750634	0.00980611	0.00648448	0.00775528	0.00760591	0.0103111	0.00961881	0.0121746	0.0153967	0.0176965	0.0223956	0.0242069	0.0238703	0.0256129	0.0261463	0.0249135	0.0262175
		36.292	-0.00215833	-0.00319077	-0.00428511	-0.00414151	-0.00325514	-0.00273768	-0.00392858	-0.00228707	-0.00217318	-0.00138585	-0.00235145	-0.00259408	-0.00426778	-0.00189836	-0.00145023	0.00297664	0.0045513	0.000327455	0.00109498	0.00212989	0.00223883	0.000889479	0.00131038	0.000453725	-0.000974857	0.0023453	0.00379368	0.00476423	0.0045513	0.00521731	0.00643545	0.00854985	0.0097556	0.00847062	0.0101914	0.0110926	0.0103919	0.0122216	0.0132342	0.0135561	0.0121869	0.0131847	0.0138383	0.0179928	0.020444	0.0230833	0.0249179
		34.188	0.000195195	0.00187524	0.00109058	-0.0019181	0.00212797	0.000782488	-0.000822941	-0.00198549	-0.00107086	-0.00219249	0.000168719	0.0010978	-0.00106604	-0.0017785	-0.00134284	0.00316295	0.00362749	-0.000866266	-3.34642e-05	-0.000538922	-0.000132149	5.04681e-06	-3.34642e-05	-0.000536515	-0.000283786	-0.000899963	0.00120852	-0.000372843	-0.00156187	-0.000259717	0.00389466	0.00387781	0.00530513	0.00553138	0.00755562	0.00563007	0.00593815	0.00805867	0.00871336	0.0117389	0.0115969	0.0111588	0.0125909	0.0120373	0.0127955	0.0136596	0.0139725
		34.028	0.00200141	-0.000322667	-0.0027263	-0.00218385	0.000979199	-0.00140997	-0.00299149	-0.00214769	-0.0019934	-0.00522636	-0.00409567	-9.1224e-05	0.0015554	0.00336354	0.000299336	0.00240884	0.00355641	0.00499811	0.00304772	0.00480765	0.000820082	0.00305013	0.00255831	0.00144691	-0.00115924	-0.000932615	-0.00248039	-0.00469356	-0.00211635	-0.00187767	0.0015554	-0.000300969	0.0022232	0.00479319	0.00205203	0.0025559	0.00718476	0.0100899	0.0125658	0.0146343	0.0151406	0.0161122	0.0151768	0.0113242	0.0109409	0.00971617	0.00897362
	2	36.139	0.00124853	0.00395281	0.00144594	0.000829921	0.00351755	0.00475196	0.00372923	0.00252812	0.00151967	7.83349e-05	-0.000616168	0.000154445	-0.00105142	-0.00101099	-0.000651845	-0.000937257	-0.00273773	-0.0021455	-0.00288044	-0.0026973	-0.00397452	-0.00571078	-0.00300412	-0.00521131	-0.00268541	-0.00073509	0.00253288	0.00273029	0.0029943	0.00234023	0.00169567	0.00229266	0.00208811	0.00273505	0.00501121	0.00949932	0.0109835	0.0146653	0.0147461	0.0175812	0.020169	0.0254087	0.0312382	0.0373579	0.0387113	0.0399385	0.0431352
		36.132	0.00300301	-0.000670227	0.00230538	0.00671184	0.00968033	0.0093149	0.00946914	0.00958304	0.00841083	0.00742608	0.00454776	0.0016908	0.000857915	-0.00385702	-1.29361e-05	-0.000546837	-0.00287702	-0.00378583	-0.00299803	-0.00965162	-0.00805229	-0.00877365	-0.00705568	-0.00401838	-0.00117565	-0.00475397	-0.00394956	-0.00201566	-0.00107125	-0.00446448	-0.00327092	-0.00367431	-0.00290549	-0.00298142	0.00305996	0.00425352	0.00612336	0.00459522	0.00963761	0.0179926	0.028794	0.0302509	0.0338957	0.0349896	0.0391706	0.0378489	0.0369971
		35.198	0.000168593	-0.00148392	-0.00411315	-0.00342255	-0.00345955	-0.00132114	-0.00507013	-0.00137293	-0.00278867	-0.00329183	-0.00179963	-0.00330416	-0.0021104	0.00175205	0.00356489	0.00350323	0.00175945	0.00146348	0.00265477	0.00171752	0.00294088	0.00324918	0.00223794	0.00060762	0.00185317	0.00094059	0.00244759	0.00339224	-0.000729192	0.000193258	0.000153795	-0.00115342	-4.35208e-05	-0.000665065	-0.000329628	-0.00119042	0.00282249	0.00418396	0.00562437	0.00699818	0.0112109	0.0135219	0.0147798	0.0165408	0.0189925	0.019984	0.0175003
		34.042	0.00306239	0.00357807	0.00309803	0.00321685	0.00326676	0.00262275	0.00248016	0.00190744	0.00121114	0.00227816	0.00202388	0.0012349	0.00104717	-0.00180218	-0.00181882	-0.00162157	0.000305717	-0.00414298	-0.00314725	-0.00197566	-0.00158593	-0.000963301	-0.000899137	-0.00079695	-0.00180456	0.00107806	0.00164128	-0.00210874	-0.0047561	-0.00497473	-0.00165484	-0.00169287	-8.6395e-05	0.000217789	0.00131808	8.23321e-05	0.00364224	0.00550299	0.00476867	0.00475679	0.00495166	0.00502057	0.00594501	0.00560518	0.00545546	0.00605432	0.00646069
		35.469	0.000988922	0.000136995	0.00134247	0.00180464	0.001909	0.00134886	0.00191326	0.00155119	0.00115931	0.00103578	6.24517e-05	0.000648151	-0.000913004	-0.000182477	-0.000599921	0.00088882	0.000946326	0.000654541	0.00108476	0.000646021	0.00124663	-0.00117071	-0.00181392	-0.000514729	-0.00208866	-0.00131767	-0.00223988	-0.00152639	-0.00223562	-0.00296828	-0.00179688	-0.00247203	-0.00117284	-0.00492771	-0.00292355	-0.00513004	-0.00587122	-0.0061055	-0.00488511	-0.00446341	-0.00298745	-0.00150083	-0.00221858	-0.00101311	-0.0019843	-0.00235063	-0.000320915
	3	37.625	-0.00131802	-0.000813537	-0.00184173	8.42636e-05	0.000772577	-0.00188235	-0.00169637	-0.00297467	-0.0036694	-0.00281435	-0.00354542	-0.00374208	-0.00153819	-0.0041183	-0.00286993	-0.00081995	-0.0018738	-0.00100379	-0.000928968	-0.000542059	0.000370705	0.000319402	0.00174733	0.00140745	0.00127278	0.00202309	0.00160197	0.00303845	0.00729659	0.0101503	0.0109327	0.0151502	0.0183737	0.0181664	0.0204088	0.0207401	0.0206076	0.021112	0.0195409	0.0177709	0.0200903	0.0220676	0.020071	0.021127	0.0231022	0.0241774	0.0245857
		35.72	-0.00359228	-0.00311222	-0.00519915	-0.00401678	-0.00741053	-0.00378786	0.0015217	0.00481766	0.004831	0.0013439	0.00221956	0.00320413	0.00259294	0.00107053	0.00258405	0.00175728	0.00521105	0.00477321	0.00327525	0.000763823	-0.00174982	-0.00070525	-0.00169426	-0.00260771	-0.00198096	0.00109942	-0.000656355	-0.00163425	-0.000485222	0.00132167	-0.00448795	-0.00293886	0.00364418	0.00558887	0.00343082	0.00310856	0.00266406	0.0032708	0.00579334	0.00953381	0.0120075	0.0139388	0.0168503	0.0169414	0.0194751	0.0201374	0.0201174
	4	35.3	-0.00211335	-0.000946184	-0.00145109	-0.00120686	-0.00185737	0.000258553	0.00205979	0.000634299	0.00174275	0.00186487	-0.000805279	0.000918457	0.000336051	-0.000471804	-0.00103308	0.000101209	-0.000295673	-0.00158026	0.000829218	0.00118383	-0.000373171	-0.000626799	-0.0018057	-0.000910957	-0.000812324	-0.000229917	0.000458168	0.00108519	0.000166965	0.000782249	0.00409821	0.00442699	0.0035158	0.00507515	0.00459373	0.00454441	0.00575384	0.0075128	0.00887254	0.0115826	0.0124985	0.0085602	0.0117587	0.0128836	0.0129329	0.0126323	0.0127991
		34.555	0.00147766	-0.00135889	0.00132508	-0.000405867	-0.000798581	4.18777e-05	3.18722e-05	-0.00219684	0.00215553	0.000602184	7.93982e-05	0.0017253	0.000309524	0.000569666	-0.00127384	-0.000235774	0.00211551	-0.00185666	-0.000718537	-0.00157651	-0.0026621	-0.000368346	-0.000178242	-0.00201925	0.00131507	0.00106494	0.000999901	-0.00195421	0.00322862	-0.000483409	0.000984893	0.000264499	0.000149436	0.000859824	-0.000731044	0.000156941	0.00345624	0.0044868	0.00333117	0.00276086	0.00364134	0.00399904	0.00350127	0.00329615	0.00556239	0.00580252	0.00516968
		36.365	0.00188363	0.00371748	0.00349505	0.000340819	-0.000101673	0.000802241	-0.00110734	8.28957e-05	0.000877962	-9.45744e-05	-0.00102688	0.000506458	-0.000844682	-0.00242535	-0.00275663	-0.00131794	0.000638969	0.00302417	0.00214392	0.000426005	-0.00160899	-0.000288608	-0.000889641	-0.00102215	-0.000716903	0.000151518	0.000189378	-4.01502e-05	-0.00220292	-0.0028844	0.000392877	-0.000676676	0.000205942	0.000274563	-0.00109314	-0.000511038	0.00248229	0.00266449	0.00314248	0.00288929	0.00305966	0.00324423	0.0014648	0.00211079	0.00195461	0.00132992	0.00168723
		35.205	0.00083665	0.00146729	0.000977314	0.000810862	0.000395902	-0.000173788	0.000616276	-0.00036603	7.94073e-05	0.0013196	0.00148371	0.000313848	0.00036308	0.00147667	0.00229956	-0.000101112	0.000426379	-0.00179377	0.000327914	-0.000316797	0.000349014	-0.000696591	-0.00128269	-0.00113499	-9.87675e-05	0.000159117	0.000721774	-0.00107638	-0.00305272	-0.0021173	-0.00221342	0.000234138	0.00366869	0.00523006	0.00238161	0.0031201	0.00147667	-9.17343e-05	0.000452168	-3.07798e-05	-0.000241776	0.000531877	0.000552977	-0.00126863	0.000506089	0.00107109	0.000487334
	5	34.448	0.0031443	0.0029764	0.0030027	0.00451788	0.00428119	0.00441875	0.00458059	0.00405665	0.0060189	0.00637291	0.00665613	0.00468376	0.00251112	0.000593374	0.000965595	-0.00090967	0.000486158	-0.000179389	0.00104651	-0.00112613	-0.00421313	-0.00587194	-0.00507895	-0.0057182	-0.00735071	-0.00961843	-0.00567572	-0.00474921	-0.00631901	-0.00823878	-0.00466829	-0.00203847	0.0023594	0.00853139	0.00992317	0.00989688	0.00807218	0.00954084	0.0120736	0.0159677	0.0172361	0.0205315	0.0222732	0.023402	0.0260723	0.0290926	0.0291027
		34.571	-0.00218378	-0.00132078	-0.000787197	-0.00525534	-0.00152029	0.00319608	0.00105713	-0.00343189	-0.00286815	0.00306849	0.00215909	0.00402893	0.00120328	-0.00071992	0.00240732	0.00236556	0.00462051	0.00248155	0.0036879	-0.000527367	0.000934174	-0.000116744	-6.33859e-05	-0.00395155	0.00192941	-0.000474009	-0.00113982	0.000328679	0.000614027	-0.00394459	-0.00389355	0.000855298	0.0108866	0.0068685	0.00946215	0.0101651	0.0101744	0.0149859	0.0209271	0.0274206	0.0356585	0.0390294	0.0413214	0.0439429	0.0440497	0.0438339	0.0400896
		34.993	0.00411393	0.00362419	0.00351399	0.00182927	0.00145217	0.00248308	-0.0019589	-0.00135651	0.00101385	0.000306169	-0.00389339	-0.00191237	-0.00159894	-0.00137365	-0.00224295	-0.00136386	-0.00074923	-0.000624345	-0.00393747	-0.00270576	-0.00221112	0.00509832	0.00707199	0.005424	0.0019664	0.00171663	0.00158685	0.000144554	-0.00605806	-0.0065625	-0.00279636	0.00329116	0.00884976	0.0160417	0.0203734	0.0217007	0.0258047	0.0210077	0.022232	0.0259271	0.0299994	0.0330848	0.0356045	0.0386923	0.0409403	0.0416602	0.0428331
		33.223	-0.00825444	-0.000764399	-0.00228296	-0.00252045	-0.00829554	-0.00889155	-0.0112322	-0.00496841	-0.00721314	-0.0029155	0.000671952	0.0129415	0.0144372	-0.00252273	-0.000647938	0.00569347	0.0048714	-0.00307535	-0.00495471	0.00266092	0.00104874	0.00249194	0.00298062	0.00859815	0.00714353	0.0109616	0.0108703	0.00259698	-0.00661942	-0.00742551	-0.00204319	0.0132429	0.0241331	0.0232174	0.0338336	0.0541161	0.0451395	0.0399239	0.0478044	0.0536525	0.0573884	0.0637435	0.0659563	0.0668583	0.0646912	0.0673401	0.0688153
		33.564	0.00322148	0.00182922	0.000474922	0.00351765	0.00797543	0.00426948	0.000943229	0.00238359	0.00255066	0.00274052	0.00422644	0.000236971	-0.00268172	-0.00308928	-0.00377528	-0.000342718	0.00248991	0.00116346	-0.00206913	-0.000530041	0.000485047	0.00246459	-0.00259566	-0.00563332	-0.00543081	-0.00199572	-0.00671929	-0.000555355	-0.00218557	-0.00522577	0.00173302	0.00560099	-0.00158563	0.00125712	0.00160898	0.00427454	0.0159797	0.0142963	0.0126307	0.0177922	0.0227562	0.0291151	0.0344892	0.0392255	0.0429593	0.0473132	0.0502674
CNO	1	34.517	-0.00103446	-0.000706506	-0.00184484	-0.000991684	-0.00017655	-0.00158581	4.68397e-05	-0.000937025	-0.0007374	-0.000680364	-0.00151926	-5.05961e-05	-1.25724e-05	-6.9608e-05	0.000267853	-0.00128637	-0.000725518	0.00111388	0.000859597	0.000731267	0.00172701	0.00137054	0.00231163	0.00214052	0.0024257	0.00196229	0.000707502	-0.000475987	-0.00112714	-0.0012935	0.000448466	0.00091188	-0.00124121	0.000557784	0.00224746	0.00360919	0.00379693	0.00444334	0.0028606	0.00318618	0.00312439	0.00406785	0.00487823	0.00640156	0.00648711	0.00784409	0.0088327
		34.605	-0.0023747	-0.00200402	0.00125158	0.0017954	0.00197586	0.00159299	0.000885782	0.00152959	0.00130279	0.00223192	0.00215388	0.000546809	0.000488282	0.00126377	0.000758972	0.00040049	0.000915046	-0.000955402	-0.00103344	-0.000553024	-0.00168944	-0.000260385	-0.000377441	-0.00228203	-0.00116513	-0.00114318	-0.000643254	-0.00189672	-0.00196257	-0.000482303	0.000678497	0.00322201	0.00231971	0.0040853	0.00558751	0.00561433	0.00671905	0.00989661	0.00637519	0.00860656	0.00853584	0.0122548	0.0135107	0.0144862	0.0147008	0.0166322	0.0165224
		37.583	0.00181465	0.00231662	0.00199392	-0.000413142	-0.00105853	-0.000150205	-0.000965308	-0.000520707	0.00109516	0.000217906	5.53631e-05	-0.00211028	-0.00215569	-0.000867304	-0.000962918	-0.0014123	-0.000427484	-0.00151986	-0.0031931	-0.000336651	0.000155757	-0.000339041	0.000382838	0.00111906	0.00163776	-0.00116371	0.000201173	0.00252936	0.00161625	0.00152303	0.000937395	0.00197241	0.00266799	0.00419542	0.00503681	0.0017764	0.00180269	0.00611963	-0.00130713	-0.000374896	0.00169991	0.002864	0.00349505	0.00448465	0.00577064	0.00389662	0.00473324
		34.993	0.00144197	-0.00178318	0.00116815	0.00220281	0.00299282	0.00316339	0.00252599	0.000822523	0.00343945	0.00168211	-0.000746287	0.000223278	0.000968406	0.00028612	0.00119509	8.63717e-05	-0.000800151	-0.00404999	-0.00133655	-0.000485941	0.00253497	0.00136117	-0.00255075	-0.00483103	-0.00468065	0.00191104	-0.000227839	0.000187368	-0.00204353	-0.00636168	7.06612e-05	0.000934741	0.000124526	0.00141503	0.00301302	-0.000602647	0.00378508	0.00426762	0.00117713	0.0026831	0.00400503	0.00471649	0.00626959	0.00571074	0.00666011	0.00612371	0.00705063
	2	41.942	-0.00135244	-0.000736831	0.00438829	0.0044501	0.00314718	0.00378999	0.00407925	0.00567884	0.00733529	0.00610408	0.00572829	0.00398283	0.000914679	0.00135228	4.86489e-06	0.000385602	-0.00197794	-0.00181724	-0.00361956	-0.00343413	-0.00363686	-0.00380993	-0.00415358	-0.00373576	-0.00486313	-0.00461837	-0.00172329	-0.00233395	-0.00196805	-0.00540457	-0.00215594	0.00321394	-1.24414e-05	-0.00220044	-0.00279133	-0.00105823	-0.00311026	0.000126009	0.00524866	0.00218298	-0.00030912	0.00300873	0.00905108	0.00910053	0.0110784	0.01138	0.0170268
		35.063	0.00127116	0.00168102	0.00116932	0.00128855	0.00206604	0.00389177	0.000260178	-0.000196876	-0.00193318	5.89747e-05	-0.00131715	0.00054832	-0.00100169	0.000406733	-0.00103646	0.000543352	-0.00113334	0.00198158	-0.00227101	-6.52247e-05	-0.0016202	0.000625324	-0.00099672	-0.0016202	-0.000306171	-0.000338463	-0.000345915	-0.00106876	-0.00168975	-0.00101908	0.00216788	0.00251067	0.00311428	0.00141275	0.0018698	0.00392654	0.00300002	0.00412029	0.00353159	0.00563553	0.00571253	0.0121386	0.0106482	0.0105712	0.0106035	0.0102011	0.0137135
		36.901	-0.00186606	-0.00107749	0.000111397	-0.00420042	-0.000831512	-0.000990673	-0.000423963	-0.00102202	0.000588881	-0.001895	-0.000915915	-0.00205657	0.00142568	0.00468849	0.00506227	0.00543365	0.00199963	0.00359606	0.00257598	0.000263324	-0.00210721	-0.0033588	-0.00283308	0.000215093	-0.000161106	-0.0008918	0.00309446	-0.000460136	-0.00178166	-0.00115466	-0.00059277	0.00217567	0.00305829	0.00213226	0.00212744	0.00366117	0.00191763	0.00152938	0.00252293	0.00315475	0.0043774	0.0039385	0.00374799	0.00497546	0.00537336	0.00574474	0.00624875
		34.368	0.00187593	-0.00104746	-0.00148851	0.00058742	-0.00126453	-0.00216279	-0.00246298	-0.00422256	-0.00139153	-0.000183839	0.00396803	0.00112084	-0.00407939	0.00169582	0.00204912	-0.00231058	0.00272108	0.00332608	0.00321524	0.00389876	0.00362627	0.00193366	0.00200986	0.00174893	0.00251095	0.00273725	-0.000571778	-0.00354598	-0.00560575	-0.00455046	-0.00413712	-0.000661835	-0.000749583	-0.00196882	-0.00144464	0.000869138	0.00394956	-0.00187645	-0.00417869	-0.00488991	-0.00510235	-0.00497996	-0.00415098	-0.00399164	-0.00432185	-0.00470286	-0.00447426
	3	35.847	-0.00416151	-0.00321938	-0.00457837	-0.00519039	-0.00355431	-0.00405068	-0.00138813	-0.0018604	-0.00220737	-0.00155198	-0.00111585	0.000640705	0.00138766	0.00151055	0.000693715	0.00134911	0.00208161	0.000915393	0.000705763	0.00101177	0.00125273	0.00203342	0.00284785	0.00208161	0.00187198	0.00118526	0.000643115	0.00125273	0.00300206	0.00318759	0.00322374	0.00332735	0.00490801	0.00656336	0.00660914	0.00601399	0.00734887	0.00508872	0.00435622	0.00668625	0.00602362	0.00731032	0.00845726	0.00872713	0.00898254	0.0107319	0.0113078
		33.791	4.9798e-05	0.000169399	0.000887004	0.000891433	-0.00371984	-0.00192583	-0.000674452	0.00198777	0.0048294	-0.00143635	-0.00257921	-0.0018616	0.000171614	-0.000275782	-0.00023813	-0.000455183	0.00216053	-0.00119937	-0.00318828	0.000439608	0.00152487	0.00207194	0.00113728	-0.000616866	0.00107083	0.00130782	-0.00184831	0.00140306	0.00144736	0.00171757	0.00412287	0.00607635	0.00309297	0.00548278	0.00341191	0.00461678	0.00257249	0.00296008	0.00356916	0.00468322	0.00482054	0.00505753	0.00584822	0.00610957	0.00717491	0.00629783	0.00686705
		35.399	0.00450577	-0.000414073	0.00027867	0.00257338	0.00778719	0.00583657	0.00101015	-0.00051206	-0.00317821	-0.00331038	-0.000701197	0.00183279	-0.000708033	0.00100104	0.000148781	-3.57986e-05	0.00129272	0.000447299	-0.00278854	-0.000785511	-0.000199869	-0.00200465	-0.00148509	-0.00200921	-0.000799183	-0.00185653	-0.00412389	-0.000844759	-0.00201832	-0.000867546	-0.000101883	0.00130639	0.00165276	0.00225891	0.00260528	0.00119017	0.00350767	0.00348717	0.00396798	0.00439183	0.00649513	0.00662046	0.00730637	0.0083546	0.00899265	0.00867135	0.00841612
		367.257	-0.00325061	0.00114032	0.00202044	0.00125638	0.00233235	0.00203253	-7.34734e-05	-0.00172733	8.85268e-05	0.00129748	0.00297068	-0.000136339	0.000932379	0.00148124	0.000816319	0.00168435	-0.000392638	-0.00154115	0.000132049	0.000593871	-0.00140333	-0.000131503	-0.00321918	-0.00301849	0.00173271	-0.00044825	-0.00172974	-0.00155324	-0.00375354	-0.00179261	0.00365979	0.00571501	0.0102849	0.00917263	0.00934672	0.00749218	0.00983514	0.0108652	0.0131017	0.0141946	0.0143566	0.0135491	0.0131622	0.0140496	0.0136288	0.0141028	0.0146927
	4	33.491	0.00211837	-0.000334672	-0.000687573	0.00238736	0.000484653	-0.000255701	-0.00175615	-0.000332204	0.000881976	0.0019012	0.000780794	0.000864701	0.00174079	0.00137554	0.000654934	-0.00201034	-0.00222257	-0.0035478	-0.00235584	-0.00158834	-0.00142793	-0.00383161	-0.000707316	0.00065987	0.00298211	0.00281677	-0.000206344	0.000242804	0.000775858	0.000351389	0.000289693	0.00343126	0.00417655	0.00202706	9.47334e-05	0.000376068	-0.00041611	0.000334114	0.00399393	0.00244412	0.00247374	0.00146439	0.0024071	0.00221955	0.00228124	0.00325357	0.0035892
		319.666	0.00253187	0.00320991	0.00400928	0.00465401	0.00330507	0.00340738	0.00150887	0.000290785	-0.000330154	-0.000867826	0.000952168	0.00250571	-0.000339671	-0.000798833	-0.000520481	8.14258e-05	0.000759463	-0.000746493	-0.000879721	-0.00111763	-0.00018741	-0.00226434	-0.00293762	-0.00252366	-0.00114618	-0.00119852	-0.00101533	-0.00259028	-0.00315412	-0.00229051	-0.00230717	-0.000948714	-0.0014507	-0.00298996	-0.00182659	-0.00199789	-0.00300186	-0.00306371	-0.00209067	-0.00236189	-0.00161724	-0.00198837	-0.0017576	-0.001553	-0.00115332	-0.0010867	-0.00239043
		306.935	0.00133648	0.00134374	-0.000408258	-0.000749461	-0.00267569	-0.00111002	0.00113563	0.0029215	0.00184707	-0.00036954	0.000528237	0.000554856	-0.00228851	-0.00100597	-0.00347183	-0.00173919	-8.15735e-05	0.00125662	0.00121064	0.000513718	0.00351679	0.0057939	0.00228023	-0.0032855	-0.00333148	-0.000323562	-0.000476014	-0.000696224	-0.00126248	0.00135342	-0.00231755	0.0008888	0.00361843	0.000932358	0.000983175	0.0012905	0.00220038	0.00165106	0.00245204	0.00189547	0.00194387	0.00109933	0.00134132	0.00230443	0.00249076	0.00221732	0.00266015
		33.143	0.00465122	0.00235552	0.00301883	0.00283143	0.00263416	0.00217305	-0.000100463	0.00288814	0.00100917	0.00105848	0.00114726	-0.000785969	-0.00227534	-0.00057144	-0.000248414	-0.00167367	-0.00147887	-0.00215698	-0.00307674	-0.00228027	-0.0023937	-0.00108927	-0.00115091	-0.00263289	-0.00328634	-0.00234932	-0.00141229	0.000138724	0.00179331	0.00075272	0.000151053	0.00153439	0.00166755	0.000932727	0.00256019	0.00333693	0.00301637	0.00430354	0.00367475	0.00296705	0.00287088	0.00365749	0.00258238	0.00200044	0.000247221	0.00324323	0.00279691
	5	36.24	-0.00464556	-0.00163984	-0.00136212	-0.00136212	-0.00355033	-0.00373175	-7.87518e-05	0.000772345	0.00109711	-0.0022916	-0.00168912	-0.00388405	-0.00183694	-0.00530404	-0.00653589	-0.000112348	0.00401099	0.00244318	0.00341523	0.00644782	0.00474787	0.0018183	0.000875373	0.00216322	0.00238943	0.00015866	0.00348018	0.0056124	0.0027769	-0.00243719	-0.00174735	0.00973798	0.00777822	0.00763936	0.0130505	0.00725188	-0.000620766	-0.00385494	-0.00696368	-0.00581694	-0.00377207	-0.00378774	-0.00355929	-0.000739472	-0.000275848	-5.1875e-05	0.000673797
		291.109	0.0056975	0.00367644	0.00159034	-0.00042109	-0.000777607	-0.00278903	-0.00220608	-0.00147378	-0.0029962	-0.00193629	-0.00239879	-0.00196278	-0.00163517	-0.000977545	0.000947162	-0.0028348	-0.000613802	-0.00328045	-0.00307569	0.000108867	0.000470201	0.00216606	0.00340664	0.00227687	0.00199262	0.0035849	-0.000555988	0.00149398	-0.00193629	0.00123141	0.00322839	0.00771134	0.0188356	0.0201316	0.0213794	0.0233113	0.0189127	0.0164821	0.0196546	0.0240051	0.0242508	0.0253661	0.0250939	0.0232776	0.0239931	0.023639	0.0245375
		294.824	0.00125088	-0.00157073	-0.0047258	-0.00240789	-0.00531111	0.00161699	-0.00482608	-0.00192751	-0.00876467	-0.00657501	-0.0070857	-0.00785523	-0.00779693	0.00122523	-0.00279731	-0.00258977	-0.00109502	0.00522679	1.73013e-05	-0.000404775	-0.00061931	0.00919104	0.00357813	0.00737681	0.0103523	0.000444041	0.00427537	0.00493996	0.00671222	0.000462696	0.00968307	0.0154476	0.0228607	0.0204402	0.0223943	0.0326874	0.0339769	0.0346019	0.0429874	0.0503679	0.0541176	0.0567434	0.057366	0.0637787	0.0705669	0.063956	0.0595813
		33.936	-0.00546897	0.000217415	0.00811858	0.0061243	0.0158801	0.0219732	0.0192758	0.0190332	0.0147629	0.0128985	-0.00614272	-0.0134559	-0.00940363	-0.00486628	-0.00902389	-0.00950408	-0.00995243	-0.0206147	-0.00909494	-0.0029161	0.00227539	-0.00464823	-0.00125502	0.0020157	0.0100786	-0.00474868	-0.00863679	0.00071476	-0.000919372	-0.00977603	-0.0029406	-0.00226196	-0.00376379	-0.0179418	-0.016854	-0.0154404	-0.00957513	-0.00398184	0.00583766	0.0159144	0.0188299	0.0112153	0.0180753	0.00565881	0.00115331	-0.00963638	-0.0247282
[truncated: 384 more columns]

## Sheet: Figure 7p
Treatment	Mouse #	Time
		baseline	1min	2min	3min	4min	5min
Saline	1	6.3751e-17	0.2149	0.3025	0.477	0.6844	0.8895
	2	1.5497e-17	0.2389	0.3715	0.6135	0.8324	0.8894
	3	1.3938e-15	0.3027	0.5506	0.5969	0.5098	0.7755
	4	5.2264e-15	0.2773	0.2032	0.4473	0.7027	0.6906
CNO	1	8.5442e-17	0.1459	0.1838	0.4558	0.7369	0.8708
	2	-2.8927e-16	0.1086	0.1774	0.3894	0.624	0.69
	3	1.4223e-15	0.2113	0.4471	0.4144	0.5015	0.4872
	4	-2.6261e-15	0.4155	0.247	0.5602	1.052	1.3704

## Sheet: Figure 7q
Treatment	Mouse #	Time
		baseline	1min	2min	3min	4min	5min
Saline	1	-2.6966e-15	0.5552	0.6416	0.6813	0.7682	0.7296
	2	-1.2583e-16	0.4317	0.6323	0.6969	0.7044	0.8203
	3	1.197e-15	0.2128	0.3028	0.4115	0.6042	0.807
	4	3.4232e-16	0.1677	0.3002	0.6016	0.8231	0.8684
	5	2.8449e-17	0.1949	0.4247	0.6898	0.8355	0.7785
	6	4.8769e-16	0.2448	0.4563	0.7276	0.8969	0.899
	7	5.8542e-15	0.3756	0.5967	0.7025	0.7665	0.8499
CNO	1	2.6183e-16	0.6151	0.8677	0.9852	0.9204	0.8651
	2	-1.4597e-15	0.3588	0.5982	0.6725	0.6805	0.7898
	3	-4.019e-15	0.2258	0.2464	0.3135	0.4044	0.5909
	4	-1.9883e-16	0.2657	0.5197	0.93	1.0404	1.1573
	5	1.5728e-17	0.1209	0.137	0.2359	0.3706	0.4241
	6	2.8958e-16	0.1708	0.2456	0.419	0.5492	0.6654
	7	1.471e-16	0.419	0.7126	0.86	1.0858	1.4742
