# Supplementary material for: Neural basis for regulation of vasopressin secretion by anticipated disturbances in osmolality
Source: eLife journal article supplement (doi:10.7554/elife.66609), 2021-09-29
Supplement: supp [file elife_poa_e66609_Figure_4_source_data_1.xlsx]

## Sheet: Figure 4b-f
Group	Mouse#	latency to drinking onset (s)	dF/F
			time (s), water bowl presented at 30s
			1	2	3	4	5	6	7	8	9	10	11	12	13	14	15	16	17	18	19	20	21	22	23	24	25	26	27	28	29	30	31	32	33	34	35	36	37	38	39	40	41	42	43	44	45	46	47
SON-projecting SFOVglut2	1	44.201	44.201	-0.00788683	0.0141186	0.00682276	0.00331978	6.2443e-05	0.0094021	0.00814437	-0.00498815	-0.0214861	-0.00792614	-0.00154412	-0.00238424	-0.00518958	-0.00298363	0.00281865	0.00352613	0.00122192	-0.000866119	0.00180657	0.00471999	0.00298078	0.00371282	0.00240596	-0.00169642	-0.00292959	-0.0121169	-0.00212385	0.00550116	0.00474947	0.0044989	0.00488703	-0.0138267	-0.0164846	-0.00929687	-0.0115716	-0.0145685	-0.0145735	-0.0143278	-0.0215352	-0.015222	-0.0113014	0.000823962	-0.00253655	-0.00532715	-0.00486532	-0.0126623
		40.146	40.146	0.00699987	0.0170263	0.00567091	0.00450702	0.00993287	0.014762	0.00733845	0.00198879	-0.0107082	-0.0105347	-0.0117282	0.00289874	-0.00972207	-0.0031535	-0.0120499	-0.00663247	0.0034828	0.00177717	-0.00187533	-0.00508767	-0.00746201	0.00115502	0.00460013	0.00157825	0.00509532	0.00735538	0.00648352	-5.54299e-05	-0.000372855	-0.0077752	-0.015495	-0.00106696	-0.0129683	-0.0136962	-0.0176535	-0.0111357	-0.0192533	-0.0103865	-0.0130106	-0.0111738	-0.0039788	-0.0103442	-0.00695836	-0.00557862	-0.00654359	-0.000317834
		46.42	46.42	-0.0134667	-0.0212574	-0.0254759	-0.0257043	-0.0286933	-0.0248587	-0.024363	-0.0276046	-0.024363	-0.00414515	0.00524932	-0.00500052	-0.00784851	0.0107412	0.00944841	0.0184395	0.00333932	0.0031838	0.00734887	0.0329419	0.0311048	0.00782029	0.0068823	0.00421413	0.0185416	0.018041	0.00997329	0.0111008	0.00761617	0.0120194	0.014775	0.0128164	0.0125394	0.000627417	0.0014196	0.00917138	0.0190713	0.0108724	-0.00623497	-0.00230319	-0.0222634	-0.0104778	-0.00237123	0.0100705	-0.0130682	0.0155186
		38.331	38.331	-0.0158657	-0.0202464	-0.024894	0.0136288	-0.00948665	-0.0228505	0.00764313	0.0101161	0.00159414	-0.000648242	-0.00647571	-0.00544494	0.00304083	-0.00859603	-0.00144845	0.0115854	0.00996689	0.0108892	0.0132039	0.00809975	0.00553638	0.0098403	0.0106631	0.00497579	-0.000571386	0.00406256	0.00821277	0.000572407	-0.000150941	-0.00336532	-0.015608	-0.0269419	-0.0354503	-0.0386511	-0.0372587	-0.0317386	-0.0235512	-0.0241028	-0.0306536	-0.029763	-0.033877	-0.0343065	-0.035283	-0.0321998	-0.0315804	-0.0307892
	2	66.996	66.996	-0.0204071	-0.0368274	-0.019902	0.00388197	0.00493393	0.0079017	-0.00111308	-0.00687098	-0.00908985	-0.0106469	-0.000959818	-0.00683615	-0.00689537	-0.00632759	0.00595105	0.0127017	0.0176968	0.0065885	0.0029798	0.0105107	0.0145548	0.0108207	0.000151355	0.000910715	0.0064213	0.00488516	-0.00419232	0.00503146	0.00347094	0.00594409	0.0047319	-0.00356185	0.0109426	-0.0181743	-0.0199787	-0.016147	-0.0130678	-0.0167984	-0.00651917	-0.0127543	-0.0091212	-0.0304669	-0.032205	-0.0307142	-0.0320239	-0.0206997
		40.626	40.626	0.0162012	0.00723976	0.00314874	-0.000802052	-4.32355e-05	-0.00253413	-0.00427446	0.00723563	0.0109514	-0.00214648	0.00537158	0.00549118	0.00832849	0.0039323	-0.00190729	-0.000731944	-0.00168871	0.00702531	-0.00250939	0.00354877	-0.00629935	-0.0118874	-0.0150876	-0.00644369	-0.00926451	-0.00286405	-0.00523536	-0.000402024	0.00593657	-0.00214235	-0.0081469	0.00761916	0.0086213	-0.0172445	-0.0280452	-0.000946392	-0.0265688	-0.0243212	-0.0241975	-0.0179002	0.00390756	-0.0290721	-0.0343508	-0.0314805	-0.0249563	-0.0287463
		35.843	35.843	0.0261124	0.018814	0.00429407	-0.00736973	-0.0152069	-0.0165965	-0.0108843	-0.017225	-0.00815217	0.00265652	0.0137132	0.019622	0.00420001	-0.0187599	-0.0170026	-0.0115213	-0.00132405	-0.00307277	-0.00902439	0.00268217	-0.00127275	0.00468742	0.00934781	0.00522615	0.00708175	0.00789839	0.00812927	0.0119559	-0.00341909	-0.0141551	-0.0271101	-0.0291239	-0.0375041	-0.0389834	-0.0488087	-0.0347891	-0.0383763	-0.0397017	-0.04284	-0.0410485	-0.0417241	-0.0471327	-0.0459911	-0.0447854	-0.048984	-0.049651
		57.726	57.726	-0.000920809	0.00530178	0.00926016	0.00904706	0.00826923	0.011599	0.0103896	0.0051899	-0.00638156	0.00776312	0.0113219	0.00947326	-0.00848595	-0.0125402	-0.0131422	-0.0192796	0.00126882	0.00162044	-0.00759624	-0.0141651	-0.00368581	0.00311215	0.00570135	0.01251	0.000150031	-0.00274283	-0.0085552	-0.00400547	-0.00354197	-0.00672785	-0.00503901	-0.00620575	0.0028884	0.00560013	0.00832251	0.0080881	0.00162044	0.00384736	-0.000707706	-0.0163015	-0.0244793	-0.0249694	-0.0177879	-0.00210353	-0.0176067	-0.0346336
		33.956	33.956	-0.0107141	-0.000952006	0.000780042	0.0047911	0.0103202	0.0105659	0.00407371	-0.000183088	-0.0050027	-0.0101632	-0.00826862	-0.00434476	-0.00147519	-0.00956072	-0.00598565	0.00383986	0.00229013	0.00203647	0.00253587	0.000696808	-0.00128098	-0.00309229	0.00277368	0.00545697	0.00145384	0.00660242	0.00341973	0.00184622	0.00203647	0.00445817	0.00588899	-0.00931102	-0.0082052	-0.00363529	-0.0201353	-0.0213878	-0.0252324	-0.0297983	-0.0302581	-0.0346457	-0.0334091	-0.0323786	-0.0324182	-0.0329057	-0.0348558	-0.0347646
		33.505	33.505	0.0234974	0.0147566	-0.00751643	-0.0110604	0.00231314	0.00222498	0.00420412	0.004473	0.00379419	0.00267018	-0.0119067	-0.00272066	0.00619207	0.00282005	0.00435399	-0.000265468	0.00208393	0.000223806	0.00668135	0.0024586	-0.00194928	0.00176656	-0.00250908	-0.00866248	-0.0151773	-0.0113028	-0.00507005	-4.50741e-05	-0.00661722	-0.00367717	0.000713081	-0.00720788	-0.00857873	-0.00695222	-0.0204403	-0.0244118	-0.0335934	-0.0322005	-0.0326546	-0.0363175	-0.039954	-0.0426384	-0.0380939	-0.0394779	-0.0376046	-0.0399716
	3	39.139	39.139	0.00211795	0.0361557	0.0314801	0.043558	0.0457134	0.0571066	0.0560977	0.0358639	0.0146091	0.00774566	-0.0332811	-0.0397758	-0.0163291	-0.0216853	-0.0125165	-0.00650795	0.0177167	-0.00699415	-0.015616	-0.00085999	0.00292018	-0.00258598	-0.0190072	-0.0243635	-0.00918608	-0.0248983	-0.0284475	-0.0245134	-0.0220662	-0.031859	-0.0348248	-0.0395125	-0.0508732	-0.0690407	-0.0726102	-0.0889302	-0.0869165	-0.0873136	-0.0941405	-0.0769049	-0.082326	-0.0825286	-0.0735988	-0.0545319	-0.0671162	-0.0782015
		39.911	39.911	0.0043411	0.0016353	-0.0231086	-0.0235239	0.00971711	-0.00072239	-0.0128629	-0.0252922	-0.0215935	-0.0302054	-0.0146826	0.00239878	-0.0217596	0.0178978	0.0287092	0.0372222	0.0121381	0.00971315	-0.00877651	-0.00436969	-0.00416003	0.00341543	-0.00206738	0.00506502	0.00391783	0.0201962	0.0076482	0.00029822	-0.00180629	0.00764424	0.0229732	0.0251291	-0.0312378	-0.0348495	-0.0558828	-0.0615476	-0.0631893	-0.0653215	-0.050222	-0.0582959	-0.0410048	-0.0761328	-0.0763979	-0.0784391	-0.0760498	-0.0761763
		38.581	38.581	0.00830802	0.0203446	0.0247931	0.011002	0.00447317	0.0197886	0.00844224	0.0180246	0.000470542	-0.0123139	-0.0306061	-0.0449197	-0.0503316	-0.0427242	-0.0149599	-0.00492701	-0.00436137	-0.0178073	-0.0273129	-0.0181285	-0.0143416	-0.000564867	0.0151245	0.0281198	0.0132358	0.0198222	0.0106952	0.020244	0.016692	0.0148848	0.00774238	-0.00377655	-0.0222126	-0.0382471	-0.0373602	-0.0348197	-0.0278354	-0.0337699	-0.0516211	-0.0454086	-0.0408068	-0.0336356	-0.0321401	-0.0333289	-0.0407253	-0.0469522
		37.143	37.143	0.014015	0.0134461	-0.00783491	-0.0129734	-0.0206315	-0.0239909	-0.0274858	-0.0153259	-0.00418197	0.00868686	0.0144169	0.0112967	0.00923773	0.00943641	0.00849269	0.00494361	0.0106736	0.0167558	0.003738	0.00249176	-0.00279123	-0.00857543	-0.00606488	-0.00349563	-0.00348208	-0.00537403	-0.00536951	0.00145322	0.0112426	-0.0033692	-0.00197395	-0.0115465	-0.0223744	-0.0273278	-0.0296984	-0.0300506	-0.0345253	-0.0250836	-0.012567	-0.0228711	-0.021819	-0.0190963	-0.0268085	-0.0369997	-0.0403727	-0.0337622
	4	46.478	46.478	0.00267275	0.0125563	0.00625341	-0.0026688	0.00332512	0.00427178	-0.000755845	-0.00301215	-0.00125125	0.00202529	-0.00973691	0.00413444	0.00523317	0.0016427	0.0038009	0.00443365	0.00392353	-0.00362037	-0.00184476	0.000754896	-0.00402258	-0.00641622	-0.00412068	-0.00741194	0.00327607	0.00520374	-0.00108939	-0.00187419	-0.0028699	-0.00387543	-0.00893739	-0.00594044	-0.00596496	-0.00668109	-0.00166818	0.0036979	-0.00528316	0.00158875	0.00197134	-0.00951618	-0.0139307	-0.0137149	-0.0139454	-0.0113605	0.00110315	-0.00369885
		52.055	52.055	-0.00773859	-0.00342753	0.000106137	0.00520639	0.000722564	0.00290951	-0.00603066	-0.00925807	-0.00280325	7.86525e-05	0.00139003	-0.00424419	-0.000427839	0.00324324	0.000793237	0.00191223	0.0053124	0.00324324	-0.00237135	-0.00141726	-0.00027864	-0.000706606	0.00356127	0.00478628	0.00852803	-0.00124843	-0.00276791	-0.000667343	-0.00115813	0.00153923	0.00281135	-0.00747161	0.00115838	-0.00194339	-0.00207296	-0.00173922	-0.00870839	-0.00901071	-0.00747161	-0.00407144	0.00724806	0.0029684	0.000286746	-0.00293281	-0.000156925	0.00305871
		39.205	39.205	0.012583	0.012641	0.0132826	0.0072039	8.12646e-05	-0.000850297	-0.0169551	-0.000125346	-0.00368123	-0.0047614	-0.000368205	0.00355378	0.000450989	0.00112882	-0.00298165	-0.000582065	0.0027962	-0.000418951	-0.00377185	-0.001597	-0.0015245	-0.00557697	-0.00463816	-0.000252213	-0.00677314	-0.00524712	-0.00305052	-0.00234007	0.00340154	-0.00131064	0.00036762	-0.0119493	-0.019293	-0.0162627	-0.0244366	-0.0157517	-0.00916548	-0.0236572	-0.007074	-0.0352927	-0.0374675	-0.039849	-0.0440646	-0.0477546	-0.0504369	-0.047635
		39.661	39.661	-0.0194155	-0.00463863	-0.00740328	-0.00349671	0.00377951	0.00268167	0.0244382	0.0304323	0.00720527	0.00325463	0.00696486	0.00992984	0.00889611	0.00612745	0.000317695	0.00567069	0.00064224	0.008239	-0.00250705	0.000818536	-0.0053358	-0.00184594	-0.000175133	-0.0021184	0.00834718	-0.00200621	0.00103891	-0.00199018	-0.022737	-0.0218996	-0.0180772	-0.0185019	-0.0174321	-0.0120992	-0.0140424	-0.0148438	-0.0229534	-0.0166428	-0.025722	-0.0236946	-0.0200726	-0.0238349	-0.0296727	-0.0330704	-0.0255898	-0.0324053
		43.959	43.959	0.00743608	0.00848705	0.00324791	0.00191352	-0.00231007	-0.0104542	-0.00592748	0.000653925	0.00527901	0.00634967	-0.00150707	-0.00536066	-0.0119736	-0.009785	-0.000747379	0.00155139	0.00464134	0.00331483	-0.00134569	0.00483815	0.0075148	0.00370452	0.00380686	0.00492475	0.00177575	-0.00293987	-0.000330137	0.00173246	-0.000353754	-0.0153508	0.00432644	0.0128287	0.00309046	0.00195682	0.00836109	0.00863269	0.0071999	0.0101403	0.0120572	-0.00663994	-0.0140716	-0.0158153	-0.0211214	-0.0229754	-0.0194642	-0.0166537
		38.805	38.805	-0.00430268	-0.00919249	-0.0114583	-0.015599	0.0105016	0.00565837	0.00226203	0.00993404	-0.0114117	-0.00909013	-0.00154839	0.00813816	0.0193926	0.00654235	-0.00929949	-0.00495404	0.0114135	0.00226203	-0.00697323	-0.000431784	-0.00454927	-0.0129843	-0.00761063	0.0130326	0.016629	0.0137026	0.0108832	-0.00523784	-0.00528437	-0.00473537	-0.00568914	-0.012547	-0.0128215	0.000284704	-0.00754549	-0.00207412	0.00498375	0.00244813	0.0115485	-0.0137473	-0.0159479	-0.018358	-0.0200422	-0.022522	-0.0215775	-0.024932
		45.723	45.723	-0.00229649	-0.00160196	-0.000318505	-0.000151981	0.000635962	0.000550669	-0.00118362	0.00147264	-0.000866816	-0.00166288	0.00224028	-0.0018619	-0.00187002	-0.00232492	-0.000281951	0.0028617	0.00197222	0.00159449	0.000713132	0.00227277	0.000619716	0.00330847	0.00026636	0.00189098	0.00111523	0.00215092	0.00403143	-0.00388862	-0.00254424	-0.00406733	-0.00277575	-0.000598753	0.00220372	-0.000785585	-0.00150854	-0.00362055	-0.00767805	-0.0022315	-0.00536296	-0.00912803	-0.0104034	-0.0114756	-0.015923	-0.0165972	-0.0193307	-0.0226571
	5	58.52	58.52	0.0018382	0.00175926	-0.00323075	-0.00460602	0.00366635	0.00439345	0.00141856	-0.00531235	-0.00313935	-0.00625551	-0.00434426	0.00325501	0.00615096	0.00339628	-0.00451046	-0.00359223	0.00204594	0.0032841	0.00289354	0.00278967	0.00305558	-0.000600715	0.00397796	0.00421063	0.00601385	0.00253622	0.000371527	0.000325823	-0.00685381	-0.00714465	-0.00779281	-0.0122635	-0.00809196	-0.00382075	-0.00110346	-0.00223358	0.000907506	0.00175926	0.00380346	0.00359571	-0.00201753	-0.00566551	-0.0126831	-0.0143741	-0.0148062	-0.00592312
		80.916	80.916	0.000649115	0.000464158	0.00126816	-0.000109586	0.00225333	0.00559389	0.00481631	0.00454831	0.00525794	0.00298561	0.000366018	-0.00139296	0.000173511	-0.00141183	-0.00134389	0.00243074	-0.00290282	0.00111717	-0.000468176	-0.00181195	-0.00110986	-0.00149488	-0.00370681	0.00196269	0.00203818	-0.00154772	-0.0066397	-0.00774945	-0.00475239	-0.00230642	-0.000973977	-0.00208749	-0.00218563	-0.00403143	-0.00164586	0.00216274	0.00790019	0.00993471	0.00976863	0.0113276	0.0109274	0.0116258	0.0125883	0.0098781	0.0105915	0.014721
		91.708	91.708	0.00836476	0.00574327	0.00457858	0.00352771	0.00411574	0.00849375	0.00703694	0.00259824	0.00660825	0.00321662	-0.00382081	-0.00481478	-0.0105434	-0.00649162	-0.00276614	-0.00385495	-0.00588082	0.0004927	0.00217334	-0.00354007	-0.00568355	-0.00306585	0.0070028	0.00866447	0.00530319	-0.00655232	-0.00720485	-0.0066889	-0.00611983	-0.00608948	-0.00805086	-0.0152211	-0.0222964	-0.0219854	-0.0174897	-0.0166817	-0.0115449	-0.00547489	0.00078482	0.00657031	0.00765912	0.00574327	0.00715076	0.00358462	0.00394123	0.00543218
		49.962	49.962	-0.00082484	0.000203142	0.00100853	0.00472383	0.00367157	0.00282571	0.00816393	0.00705905	0.00366752	-0.000675094	0.00246956	0.00293903	0.00209722	-0.00318839	0.00100853	-0.00123765	-0.00252465	-0.00209565	-0.0023061	-0.00335837	-0.00359715	-0.00522007	-0.00392497	-0.00141977	0.00279738	0.00134849	0.000182906	0.00167631	-0.000958396	-0.00547909	-0.0090325	-0.0144436	-0.0163134	-0.0146257	-0.0133225	-0.0142453	-0.0131768	-0.0112099	-0.0115418	-0.0122743	-0.00903655	-0.00876539	-0.00423661	-0.00207542	-0.0047506	-0.00791953
	6	50.737	50.737	0.00456559	0.00355621	0.00257106	0.00221038	0.00147286	-0.00087427	-0.00232777	-0.0033506	-0.00410965	-0.001383	-0.00213397	-0.000979245	0.000404271	-0.000454371	-0.000623946	-0.000575496	-0.000244421	-0.000209429	3.2821e-05	-0.000758529	-0.000949637	-0.000155596	0.00254415	0.00160206	0.00198159	0.00166397	0.00162629	0.000781104	-0.00220395	-0.00231162	-0.00136685	-0.00223356	-0.0102144	-0.0107365	-0.00686054	-0.0085186	-0.00890082	-0.0104001	-0.00923728	-0.00848361	-0.00768688	-0.00663174	-0.00489562	-0.00792913	0.000662671	-0.00726159
		36.705	36.705	-0.00167295	-0.00318835	-0.000436513	-0.000780923	0.00174361	-0.00215168	-4.73287e-05	-0.00107023	-0.0012321	0.00423714	0.00126832	-0.00245132	-0.00438346	-0.00223089	0.00159207	0.001134	0.00580076	0.00110645	0.00250475	0.00295593	0.00191237	0.00282506	0.00464699	0.00128554	-0.00269585	0.00137853	-0.00305403	-0.00683566	-0.00745905	-0.000942796	0.00624161	0.00185382	-0.00649814	-0.011468	-0.00539603	-0.00491385	-0.00210002	-0.0108894	-0.0154563	-0.0207602	-0.0231779	-0.0262329	-0.0282546	-0.0280582	-0.0295564	-0.0304691
		33.787	33.787	-0.00441289	-0.0022571	-0.00146994	-0.00052456	0.00108931	0.00284559	0.00212963	0.000242821	0.00010042	-0.000516649	-0.00423093	-0.00411622	-0.00712245	-0.0108605	-0.0121737	-0.00890642	-0.00398569	-0.000401937	0.00190416	-0.00184968	-0.00301261	0.00204261	0.00339541	0.00924966	0.0142851	0.00562635	0.00502511	0.00652031	0.00368417	0.00631067	0.00138994	0.00475613	-0.00895388	-0.0129767	-0.0201482	-0.024701	-0.028174	-0.0284351	-0.0280553	-0.0281028	-0.0301004	-0.0286605	-0.0280791	-0.0257611	-0.0300292	-0.030761
		34.86	34.86	0.0132397	0.0124392	0.0157427	0.00807647	0.00404934	0.00352498	0.00344807	0.00740179	0.00271046	0.00387106	-0.00209273	-0.00197037	-0.000121112	0.00107794	0.000504631	-0.000365815	0.00109192	-0.00243881	-0.00299114	-0.00729443	-0.0111643	-0.0148313	-0.0102169	-0.00585418	-0.00460968	-0.00240735	-0.00188997	-0.00241434	-0.00324983	-0.000425244	-0.00284082	-0.00715111	-0.0190507	-0.0185823	-0.0147474	-0.022945	-0.0276433	-0.0348831	-0.038253	-0.0395219	-0.0395884	-0.0415565	-0.0422941	-0.0459297	-0.0487263	-0.0489675
		34.734	34.734	0.00385978	0.0025904	-0.000405664	0.00520013	0.00479802	0.00228685	0.00495571	0.00257463	0.00272443	0.00213311	0.000489213	-0.00154496	-0.000358358	-0.00246743	-0.00332683	-0.0012217	0.00103718	0.0008992	0.0024879	0.000410369	0.000658727	-0.00228609	-0.000642195	-0.000496334	0.00318567	-0.00156861	-0.00807716	-0.00710344	-0.00513235	-0.010817	-0.0269011	-0.0376712	-0.0434898	-0.0465135	-0.0553755	-0.0600116	-0.0621206	-0.0617027	-0.0588723	-0.060256	-0.0625346	-0.0632481	-0.0642809	-0.0663979	-0.0662915	-0.0664413
		34.534	34.534	-0.00540274	0.00376605	-0.00100439	0.00806963	-0.000885038	-0.00233477	-0.0011132	-0.00628732	-0.0057678	-0.00119043	0.00381871	-0.000116291	-0.00234881	-0.00166782	0.00131589	0.0025831	0.00547906	0.00314123	0.00266734	-0.00261559	-2.8535e-05	0.00495603	0.00731141	0.00072617	-0.00534306	-0.00693321	0.00044886	0.00262522	0.00851192	-0.00490077	-0.00748081	-0.0167725	-0.0178396	-0.0209321	-0.0251374	-0.0354295	-0.0390766	-0.0430959	-0.0450897	-0.044851	-0.0449001	-0.0458269	-0.0470133	-0.0488738	-0.0519452	-0.0552659
		33.578	33.578	-0.00152521	-0.00556742	-0.00983714	-0.00734963	-0.00188166	0.00167518	0.00192924	0.0040641	0.00527373	0.0104763	0.00669949	0.00206954	0.00368491	0.00584631	0.00682842	0.00940314	0.00553537	0.00197095	-0.002094	-0.00086921	0.00112914	0.0018079	0.00286964	-0.00315575	-0.0123853	-0.0111264	-0.00381554	-0.000679613	-0.00233669	-0.00630305	-0.00677705	-0.028611	-0.0318038	-0.0372225	-0.0461601	-0.0537098	-0.0585104	-0.057752	-0.0615857	-0.0651653	-0.0690786	-0.0714864	-0.0756234	-0.0774966	-0.0776635	-0.0783423
SON-projecting MnPO/OVLTVglut2	1	94.228	94.228	0.0688024	0.108571	0.0700302	0.065248	-0.0105647	0.0399551	0.0539805	0.0839139	0.0765722	0.0163968	0.0195451	-0.0045232	-0.062476	-0.0704599	-0.0657344	-0.0706016	-0.0272157	-0.00708587	-0.0298508	-0.0340285	-0.0207366	-0.0285128	-0.0344755	-0.033997	-0.0282767	-0.0271527	0.0152099	0.00868365	0.0155877	-0.0287143	-0.0580905	-0.0692195	-0.0651488	-0.0904606	-0.101265	-0.104867	-0.112243	-0.1288	-0.121411	-0.125535	-0.124717	-0.127326	-0.119953	-0.110074	-0.104839	-0.111204
		59.864	59.864	-0.0197776	-0.0590343	-0.0638905	-0.0352542	-0.0274286	-0.00473356	0.0286426	0.00399999	0.0166413	0.0472175	0.0378061	0.0132419	0.00794059	0.0259262	0.0488717	0.0209688	-0.0135733	-0.00797861	-0.0354489	0.00130127	0.0161177	0.0344877	0.0347786	0.0515653	0.0015466	-0.0202202	-0.0274438	-0.0178554	-0.0241659	-0.0336886	-0.0387547	-0.0386788	-0.0312251	-0.0375508	-0.0163075	-0.0105332	-0.0056795	-0.0121241	-0.0212168	-0.0156473	-0.00539117	-0.0120482	-0.00829223	0.0125008	0.00990835	0.000312323
		64.737	64.737	-0.0191909	-0.0277214	-0.030476	-0.0387786	-0.0499186	-0.0334454	-0.00516169	0.0173851	0.0146978	0.0455989	0.0505385	0.0227234	0.0178562	7.56628e-05	-0.00701793	-0.0162059	-0.000457651	0.0104131	0.0173799	0.0321625	0.0112416	0.00542433	0.0046399	0.0146123	0.00259725	0.000702177	0.0012562	-0.00510214	-0.00664772	-0.0203275	-0.00885346	0.00776729	-0.00950586	-0.0132132	-0.00174692	0.00677315	-0.0122242	-0.0195508	-0.00696097	-0.00398891	-0.00953693	0.0176931	0.0185242	0.00401079	0.00232024	-0.0335257
		48.656	48.656	0.017701	0.00804221	0.00566006	-0.000725524	0.0109401	0.0157555	0.00399792	-0.00108553	0.000773211	-0.00794345	-0.00365661	0.0164499	0.017535	0.009352	0.00163875	0.000934064	-0.00255873	-0.0143163	-0.0156414	-0.00561237	0.000372357	0.0157299	0.00376302	-0.00452726	-0.0159784	-0.0104762	-0.00770601	-0.0034115	-0.00126425	-0.0188176	-0.0149239	0.00400813	-0.0133741	-0.0275343	-0.0166627	-0.0181844	-0.0251674	-0.00643961	-0.0019	-0.000454884	-0.00894687	-0.0241283	-0.0253002	-0.0129529	-0.0053162	-0.00828303
		35.421	35.421	-0.0191236	-0.0599865	-0.0451913	-0.0585471	-0.0592102	-0.0333607	0.0227035	0.0459282	0.0573223	0.0280276	0.0438588	0.00475589	-0.0143715	-0.0263292	-0.0313604	0.00137965	0.00249033	0.0240104	0.0272374	0.026939	0.0179072	0.0138927	0.00181895	0.0312657	0.0403251	0.0207253	-0.00549714	-0.00682884	-0.0243703	-0.031225	-0.00194408	-0.00269558	-0.0124209	-0.00664649	-0.0453433	-0.0346344	-0.0245361	-0.0331701	-0.0483631	-0.0625311	-0.0772545	-0.0776606	-0.0798184	-0.0798074	-0.0782712	-0.0819984
		40.567	40.567	-0.0210469	-0.00202941	0.0219338	0.0096697	-0.00547717	0.00648021	0.0343463	0.0336845	-0.00589361	-0.0236489	-0.0231001	-0.0136059	0.0156678	0.0206296	0.0125493	0.0176951	0.018599	0.0323125	-0.000253885	-0.0107392	0.0232767	0.0239385	-0.000780087	-0.0126632	-0.036691	-0.0223156	0.00290333	-0.0135381	-0.0225707	-0.0472344	-0.0483416	-0.0257343	-0.0212213	-0.0104002	0.0386044	0.0405639	-0.0041891	-0.00026357	-0.0155267	-0.0392574	-0.0281329	-0.039619	-0.0242881	-0.0392187	-0.054556	-0.0599278
	2	39.522	39.522	-0.0102144	0.00707441	0.0128841	0.00387616	0.00404243	-0.00632824	0.00721786	0.00415001	0.00940544	0.00130713	0.000306248	0.000312768	-0.00233777	-0.00635758	0.00211239	0.0118375	0.00677447	-0.00114128	-0.0075932	-0.0154503	-0.0100677	-0.00375269	-0.00410153	-0.0183518	-0.0113489	0.000746374	-1.97715e-05	0.00336757	0.0179928	0.00578663	-0.00815069	-0.0169141	-0.0210252	-0.033114	-0.0404592	-0.0411015	-0.038252	-0.0411341	-0.0333813	-0.0230498	-0.00762254	-0.0226879	-0.0363122	-0.0482837	-0.0570112	-0.0622438
		36.536	36.536	0.000171763	-0.00154907	-0.000786255	-0.00288549	-0.000215648	-0.0112073	-0.00799692	-0.00940842	0.00653252	-0.00187942	-0.00345609	-0.00142293	-0.00223079	0.00203674	-0.0149253	-0.00836931	-0.00880478	-0.0235084	-0.0109701	-0.0157121	-0.00678363	0.0191249	0.0358317	0.015479	0.00291067	0.00470959	0.00375157	0.0105448	0.0117911	0.0103045	0.015434	0.00748754	0.00341221	-0.00285245	-0.0123726	-0.011847	-0.00158811	-0.0167092	-0.0298601	-0.0428429	-0.050378	-0.0554594	-0.0582313	-0.0601623	-0.0639193	-0.0665862
		38.898	38.898	-0.00181655	0.00144472	-0.00259568	-0.0088811	0.00277817	0.00661532	0.0161312	0.018521	0.000881156	-0.0249349	-0.0153297	-0.0123641	-0.0133588	-0.00665456	0.0101045	-0.000775655	-0.00807425	-0.00663301	-0.00857006	-0.0107627	0.00339409	0.00954708	0.0119245	0.00982732	0.00659685	0.00743757	-0.00241707	0.00689864	0.00857701	0.00397613	0.00312001	-0.00698716	-0.017159	-0.0207806	-0.010076	0.00167569	-0.0178858	-0.023275	-0.0279714	-0.0176055	-0.0167063	-0.027571	-0.0411674	-0.0505847	-0.0565621	-0.0630139
		38.861	38.861	0.0155138	0.0040905	-0.00271085	0.00739649	-0.000335672	-0.0107223	-0.00105143	-0.00218125	0.00059514	-0.00522725	-0.0106869	-0.00796512	-0.0220364	-0.016474	-0.0108121	-0.000852433	0.000999562	0.00214221	-0.00193089	-0.00114131	-0.00581462	0.00548351	0.0116365	0.00600348	0.00234763	0.00727452	-0.000553932	-0.00488702	0.0136875	0.0179436	0.0102692	0.00238615	-0.00122155	-0.00514059	-0.00529786	0.00813151	0.00782659	0.00123066	-0.00586598	0.00196889	-0.00189558	-0.0148178	-0.0286998	-0.0382647	-0.0409608	-0.0459166
		39.25	39.25	-0.00558072	-0.00462415	-0.00344397	0.00557821	0.00769322	0.000820216	0.00564965	0.00955977	0.0108052	0.0125568	0.00787025	0.00179853	-0.00202775	-0.00342223	0.00273646	-0.00354646	0.00230787	-0.00575464	-0.000990431	0.000689775	0.00191344	-0.00436327	-0.00415829	-0.00486329	-0.0111959	-0.00689445	-0.00650934	0.00121154	0.00273335	-0.00239423	-0.00627951	-0.00525462	-0.00951259	-0.00631367	-0.010258	-0.0141557	-0.0193795	-0.0112487	-0.00513349	0.00842307	0.00486389	-0.0041645	-0.0125034	-0.017603	-0.0217306	-0.0268209
		36.191	36.191	0.00608489	0.00275214	-0.00903881	-0.0248403	-0.0369375	-0.0304177	-0.0202946	-0.0241833	-0.012101	-0.00487362	-0.000119783	-0.0132902	-0.0151929	-0.0107632	-0.00302441	-0.00011681	0.011252	0.0311057	0.0189788	0.0211045	0.0269881	0.00659327	-0.00383604	-0.00517092	-0.00551579	0.00997655	0.0198678	0.0342631	0.0180275	0.0131458	-0.00042303	-0.0174643	-0.0190638	0.000231032	-0.014417	-0.000690601	0.00392945	-0.00667824	-0.0182641	-0.0304712	-0.0395062	-0.0504498	-0.0552869	-0.0569013	-0.058477	-0.0592856
		38.982	38.982	-0.0116348	-0.0114493	0.0125843	0.00480783	0.00210099	0.0069018	0.00930758	0.00200154	0.0133127	0.0117752	0.00577552	-0.00905968	-0.00607328	-0.0196478	-0.0255238	-0.00717268	-0.0106859	-0.0105677	-0.0145647	-0.0141078	-0.00767534	-0.00668615	-0.00143376	0.0319138	0.018041	0.00906566	0.00299879	0.0266023	0.0152454	0.00714372	-0.0116052	-0.0235347	-0.0189167	-0.0157179	-0.0201746	-0.0302682	-0.035155	-0.0364829	-0.0363592	-0.00686356	-0.00917526	-0.0278973	-0.0420498	-0.0534013	-0.0632072	-0.0697015
	3	83.662	83.662	-0.0324876	-0.035809	-0.0303916	-0.0270989	-0.0312229	-0.0346338	-0.0291268	-0.0318499	-0.0406962	-0.0380269	-0.0367298	-0.0274644	-0.0058915	-0.0276077	-0.00960343	0.0163155	0.0340081	0.0506257	0.0629009	0.0526286	0.043854	0.0258462	0.0150579	0.0117437	0.012514	0.00774157	0.0217365	0.0348572	0.0514462	0.0117079	-0.0143437	-0.0183816	-0.0205995	-0.0169234	-0.011377	-0.0042541	-0.00562278	-0.00406062	0.000332057	0.00170791	0.000210238	-0.0101301	-0.0106353	-0.00218675	-0.0111405	-0.0251104
		50.732	50.732	0.00732247	0.023713	0.0237606	0.0310101	0.0130109	0.00992326	-0.00972159	-0.0113514	-0.00123131	-0.0105762	-0.0168228	-0.0246331	-0.00526611	-0.00774255	-0.0122615	0.00412373	0.0239882	0.0307375	0.0165668	0.0095211	0.015363	-0.00435861	-0.00353842	-0.00635881	-0.00565768	-0.014566	-0.0119017	-0.00575028	-0.00370775	-0.0106608	-0.0429339	-0.0574248	-0.0980824	-0.109586	-0.117037	-0.118944	-0.0995349	-0.083319	-0.0816839	-0.0941217	-0.0876316	-0.0849223	-0.101667	-0.109988	-0.120931	-0.113372
		45.124	45.124	0.0198861	0.0198791	0.00882885	0.000762869	0.00310313	0.00289198	0.0216316	0.0175318	0.0117603	0.0169335	0.0172573	-0.0104141	-0.0039634	-0.00992842	-0.00522327	-0.0113079	0.00595367	0.0122073	0.00551377	0.00989868	0.028385	0.0190802	0.00977199	9.76293e-06	-0.00739461	-0.00376281	-0.0126136	-0.0184554	-0.0304523	-0.0508777	-0.0668935	-0.0689381	-0.0704444	-0.0917706	-0.0965778	-0.0956629	-0.0855874	-0.0743295	-0.0656512	-0.0648207	-0.0764727	-0.0937484	-0.0933226	-0.0857845	-0.0794324	-0.0713453
		36.773	36.773	-0.0436876	-0.0444839	-0.0241513	0.0317282	0.0443138	0.0241937	0.010606	-0.0184388	-0.0372498	-0.047325	-0.0371789	-0.0316284	-0.0190529	-0.0314462	-0.0289291	-0.0224642	-0.0293812	-0.0216476	-0.0341556	-0.0224878	0.00257546	0.0256682	0.026667	0.0510723	0.053775	0.0810281	0.0894668	0.0510487	0.0271326	0.00648949	-0.0320569	-0.0744499	-0.107065	-0.123702	-0.122302	-0.0997561	-0.066362	-0.0713895	-0.0784989	-0.0870895	-0.0968982	-0.114744	-0.130724	-0.145547	-0.162492	-0.164719
		35.407	35.407	0.0270938	0.0257805	0.0254102	0.00361921	-0.0343331	-0.037061	-0.0269154	-0.0217952	-0.0109725	-0.017925	-0.0266275	-0.0158269	0.00342934	-0.0127889	-0.0320293	-0.0331812	-0.0240136	-0.00128266	0.0108027	0.00285656	-0.000187729	0.00382491	0.0244292	0.05185	0.0499576	0.0416823	0.0207774	0.00999576	0.00989133	-0.0379344	-0.0789215	-0.0976524	-0.094491	-0.0744247	-0.063257	-0.0557729	-0.0564374	-0.0641842	-0.0686652	-0.080893	-0.0884911	-0.100105	-0.114542	-0.123089	-0.131228	-0.138111
		35.045	35.045	0.00959304	-0.000151991	0.00317354	0.00177772	0.0166686	0.0295591	0.0243167	0.00301273	-0.00346144	-0.000882064	0.0142051	0.0101205	0.00767298	0.0113041	-0.00401463	0.00253031	-0.0071504	-0.0178378	-0.0148596	-0.0219738	-0.0205394	-0.0191178	-0.0233825	-0.0141874	-0.00537507	-0.00244513	0.00879543	0.0108441	-0.00441022	0.00727739	-0.00106217	-0.0402514	-0.0572199	-0.0740502	-0.0806209	-0.0633017	-0.0588023	-0.0680939	-0.0818848	-0.0929485	-0.0960103	-0.0997347	-0.111323	-0.116037	-0.115134	-0.11772
		35.628	35.628	-0.000895372	-0.0284358	-0.0406801	-0.0333365	-0.0229049	-0.00849098	0.0277375	0.0164536	-0.0135927	-0.0128545	0.00974029	0.0373588	0.0444742	0.00412235	-0.020186	-0.0194688	0.0210752	0.0643411	0.0346338	2.59445e-05	0.00324305	0.0252346	0.00236075	-0.0129355	-0.0330034	-0.0336726	-0.0313348	-0.00407947	0.0245384	-0.000226142	-0.046313	-0.108128	-0.136848	-0.159749	-0.160178	-0.16245	-0.176489	-0.186938	-0.19629	-0.204695	-0.21543	-0.223674	-0.228653	-0.234814	-0.238868	-0.240729
	4	107.064	107.064	-0.00213811	-0.00889911	-0.00739316	-0.0109452	-0.0143079	-0.0138821	-0.0124669	-0.00999112	0.00511962	0.000440136	-0.0107283	-0.00878873	-0.0118203	-0.0167166	-0.0166102	-0.0196379	-0.0164525	-0.0063524	-0.0131528	-0.00761787	0.00106302	0.0249493	0.0456068	0.0455279	0.0393977	0.0286905	0.0141277	0.00885295	-0.00422357	-0.00647856	-0.0201307	-0.0254409	-0.0299154	-0.0381744	-0.0450379	-0.0409813	-0.0373071	-0.0420536	-0.0407606	-0.0371179	-0.0330101	-0.041892	-0.0467134	-0.0557097	-0.0565297	-0.0583431
		71.762	71.762	0.0257613	0.0083879	0.00552342	-0.00142461	-0.00562807	-0.00569468	-0.00446229	-0.00659733	-0.0075466	-0.00236389	0.000807018	-0.00257706	-0.00561475	-0.00897551	-0.0156671	-0.0200138	-0.0142881	-0.0186615	-0.00810285	-0.00775977	-0.00749997	0.0019628	0.0166882	0.0212581	0.0120551	-0.000172234	-0.00227729	0.00551676	0.000150853	-0.00382278	-0.00352967	-0.00748998	-0.0261557	-0.0329605	-0.0286272	-0.0300761	-0.0148544	-0.00909542	-0.0150509	-0.017066	-0.019261	-0.0204601	-0.0282108	-0.034919	-0.0337366	-0.0359449
		49.145	49.145	0.0202446	0.0593278	0.0666567	0.0708392	0.0758298	0.0564996	0.0256953	-0.000533529	-0.0109525	-0.0181541	-0.0267736	-0.0281765	0.0016812	0.0185236	0.00667931	-0.0116259	-0.0157561	-0.0294672	-0.022187	-0.0266988	-0.0231223	-0.0209338	0.0041204	-0.000896416	-0.0156887	-0.0196206	-0.00943361	-0.0254792	-0.0348581	-0.0354006	-0.0303389	-0.0403239	-0.0661038	-0.0807914	-0.0894633	-0.0936832	-0.0959728	-0.0930435	-0.0879144	-0.0705482	-0.067705	-0.0544877	-0.042894	-0.0374657	-0.0487451	-0.0366651
		40.515	40.515	-0.0059947	-0.00901586	-0.0122441	-0.00754638	-0.00444303	0.0045547	0.0317616	0.0334743	0.0339083	0.028701	0.0196178	0.0191805	0.0193153	0.0121224	0.00501494	-0.00404525	-0.0113006	-0.0174416	-0.0244011	-0.0308741	-0.0237896	-0.0135887	-0.0079343	0.00216144	0.00512014	0.022708	0.0122375	0.00422267	-0.0182437	-0.0314691	-0.0317683	-0.0382478	-0.0458122	-0.0686698	-0.0817144	-0.0634756	-0.0541097	-0.0418706	-0.0315118	0.00631677	-0.000248255	-0.0189341	-0.0411999	-0.0452961	-0.0598627	-0.0750113
		41.027	41.027	-0.00515586	0.000415629	-0.00425387	-0.00949232	-0.00378207	-0.00977332	-0.0200212	-0.0159172	-0.0096068	-0.0148106	-0.0169545	-0.0208816	-0.023539	-0.0258841	-0.0205867	-0.00454528	0.0228369	0.0363944	0.0185004	0.0151665	0.00770088	0.0181361	0.0303858	0.0222402	0.00969219	0.0107676	0.00718051	0.00366971	0.00460985	0.00246591	-0.00495811	-0.0190499	-0.0306438	-0.0336516	-0.0285589	-0.0133431	0.00485963	0.0265697	0.0275931	0.0226808	0.00389174	-0.0119971	-0.0205624	-0.0314001	-0.029839	-0.0404893
		37.102	37.102	0.000569774	0.00255073	0.00740797	-0.00137594	-0.00535901	0.00814466	0.0216096	0.025642	0.0245634	0.0287826	0.0228961	0.0258076	0.0101926	0.00570194	-0.00472101	-0.00199984	-0.0117672	-0.0221091	-0.0154083	-0.0132406	-0.0114676	-0.000529977	-0.0065927	-0.0141605	-0.0146752	-0.0195958	-0.0228986	-0.0182987	0.000241963	0.0104111	-0.010322	-0.0346187	-0.0562754	-0.0669098	-0.0728879	-0.073963	-0.0740829	-0.0790846	-0.0677487	-0.0599236	-0.0622218	-0.0666948	-0.0793419	-0.0889718	-0.10286	-0.101615
		40.926	40.926	0.0214976	-0.00345914	-0.0220972	-0.0211317	-0.0165241	-0.0027075	-0.00606847	-0.00567432	-0.0146817	-0.00249057	0.00173203	-0.0162492	-0.027429	-0.0338515	-0.0490308	-0.0591718	-0.0468309	-0.0303225	-0.00813394	0.0150751	0.0500872	0.0733818	0.0572491	0.0354792	0.0275687	0.0123405	0.0257905	0.0337346	-0.00253029	-0.0217306	-0.0406345	-0.0800984	-0.0981377	-0.0988526	-0.112205	-0.11175	-0.11618	-0.105678	-0.110653	-0.123391	-0.130183	-0.126208	-0.131002	-0.12934	-0.137223	-0.146649
[truncated: 385 more columns]

## Sheet: Figure 4h-k
Group	Mouse#	latency to drinking onset (s)	dF/F
			time (s), water bowl presented at 30s
			1	2	3	4	5	6	7	8	9	10	11	12	13	14	15	16	17	18	19	20	21	22	23	24	25	26	27	28	29	30	31	32	33	34	35	36	37	38	39	40	41	42	43	44	45	46	47
SON-projecting MnPO/OVLTVgat	1	36.013	0.00850415	0.00998547	0.00609003	0.00518866	0.00270466	0.00958719	0.0105864	-0.000712145	0.00184522	-0.000775031	0.0146775	0.00520962	-0.000237006	-0.000163639	-0.00556136	-0.00373417	-0.00363984	-0.0107529	-0.00906201	-0.0146659	-0.0170415	-0.0122308	-0.00943234	-0.00861831	-0.00980616	-0.00264065	0.00645337	0.00600618	0.00451788	0.00674684	0.0109707	0.0222238	0.0799566	0.0679699	0.0643923	0.0617197	0.0852181	0.0794081	0.064836	0.0572723	0.057667	0.0525523	0.058254	0.0593719	0.0514308	0.0382562	0.0374352
		35.297	-0.000866305	-0.0103731	-0.00300471	0.00707275	0.00729537	0.0018992	0.00237579	-0.00335588	-0.00477939	-0.0104703	-0.00947322	-0.0067328	-0.00392027	0.00395921	-0.00589563	-0.000546485	-0.000361491	0.00570881	0.0104026	0.00384633	-0.0035252	-0.00563852	0.000309503	0.002774	-0.00268175	-0.00273192	-0.0030831	-0.00670458	0.00205597	0.0332196	0.0437329	0.0893574	0.0690112	0.0417262	0.0342574	0.0483326	0.044639	0.0368912	0.036794	0.0393307	0.0404469	0.0396097	0.0427546	0.0460155	0.0437454	0.0314637	0.0347121
		34.977	0.00828832	0.0068165	0.00231843	0.00466133	-0.00281792	-0.0105149	-0.013804	-0.00823963	-0.00527721	-0.000873015	-0.00322342	-0.00332855	-0.00952747	-0.000685283	0.00413193	0.00219077	0.00362129	0.00375646	-0.00126725	0.00401929	0.000685162	-0.00164647	0.00460501	-0.0015113	-0.00719584	-0.00386171	-0.00127852	-0.0017516	-0.00718833	0.00902798	0.02987	0.0238138	0.0150542	0.0112657	0.0466608	0.0517596	0.0564717	0.0534004	0.0449637	0.038348	0.0359112	0.0419525	0.0356634	0.034477	0.0343568	0.0329976	0.0304257
		35.122	-0.00740797	-0.0145659	-0.0174987	-0.00326501	0.0138606	0.0143391	0.0086272	-0.00119353	-0.00268732	-0.00344618	-0.00764383	-0.0132567	-0.00565439	0.00573191	0.00783415	0.0118643	0.0134094	-0.000383399	-0.00227371	-0.00525787	-0.00718237	-0.00562363	-0.0105562	-0.00715844	0.00206751	0.00600195	0.00312034	-0.00156954	-0.00339833	0.00625491	0.0269116	0.0672952	0.0734584	0.0810982	0.0662355	0.0778543	0.0992869	0.0749043	0.0664611	0.060568	0.0495235	0.0496945	0.0483647	0.0453054	0.0490655	0.0412103	0.0427929
		35.43	0.00428509	0.00697856	0.00864271	0.00931698	0.0025241	0.00590261	0.00724038	-0.00041326	-0.00527659	-0.00421139	-0.00116643	-0.00638841	-0.00366982	-0.00118436	0.00229457	-0.000255453	-0.00134934	-0.00323585	-0.00961628	-0.00244323	-0.00669685	-0.0127366	-0.00341877	-0.00420063	-0.00451266	-0.000804191	-0.00142466	0.00584881	0.00690325	0.0115872	0.0383678	0.046416	0.0619528	0.037733	0.027827	0.038106	0.0487687	0.0344406	0.0356851	0.0239894	0.0247103	0.025234	0.0230426	0.0197466	0.0209552	0.0205715	0.012387
		35.237	-0.00606367	-0.0040968	0.00421225	0.00668758	0.00970479	0.00967134	0.00354659	0.00554023	0.00509869	8.7834e-05	0.00565731	-8.94525e-05	0.00460697	0.0055971	0.00135225	-0.00108627	-0.00134718	-0.00630786	-0.0103252	-0.0043276	-0.00672265	0.00277724	-0.00123345	-0.00321036	0.00322882	0.000893986	-0.000929055	-0.000497546	-0.00477249	-0.00941539	0.0246069	0.0551938	0.0626934	0.0468614	0.0380907	0.0436067	0.0387764	0.02739	0.0235331	0.0198938	0.0178499	0.0219075	0.0222252	0.0181778	0.0138861	0.0182781	0.0183918
	2	49.343	0.00101865	0.00317943	0.0115124	0.00458327	0.00378965	0.00410643	0.0109822	0.00781776	0.00286598	0.00359624	0.0024525	0.00678406	-0.00120549	-0.00209247	0.000451776	0.000708535	-0.00191241	-0.000138437	-0.000111761	-0.0051269	-0.00666412	-0.00471342	-0.00603056	-0.0130331	-0.00967187	-0.00268602	-0.00302614	-0.00554372	-0.00407652	-0.00289276	-0.0032629	-0.00198244	0.00654064	0.0225931	0.0274448	0.0251507	0.0219529	0.0220996	0.0148203	0.0134331	0.0148203	0.0175946	0.0157306	0.00498341	0.0178314	0.00296268	-0.00233923
		37.843	-0.000668134	0.00259544	-1.39068e-05	5.00155e-06	-0.00441576	-0.000705951	0.00144203	0.000719736	-0.00173078	0.00113194	-0.000842091	-0.000600064	0.00283747	0.00368456	0.0115807	0.000768897	0.000462583	0.00376019	-0.0040981	-0.0021808	-0.00277452	-0.00526664	-0.0001803	0.00283747	-0.00203331	-0.00450274	-0.00623096	-0.00276696	-0.000959322	0.00630903	0.00183533	0.020097	0.0609238	0.0480926	0.0431008	0.0454871	0.0255842	0.0258338	0.0262157	0.0312869	0.0199911	0.0141825	0.0102117	0.00662669	0.00513672	0.00402113	0.0010563
		36.354	0.000768616	-0.0024044	0.00169108	0.0026528	0.00219484	0.00770674	0.00293739	0.00243363	0.000595245	0.00238457	0.00482158	0.000215791	-0.00182868	-0.00268245	-0.00279694	0.000938716	0.00612677	0.00163874	-0.00355585	-0.00511619	0.00173034	0.000526551	-0.00765461	-0.00709851	-0.00615969	-0.00739619	0.00212287	0.00502112	0.00146864	-0.000680506	-0.000601998	0.00611041	0.0358779	0.0400519	0.0275986	0.0313212	0.0237289	0.0225512	0.0117957	0.00527954	0.00317946	0.00108265	0.00123639	-0.00154409	-0.00168148	-0.00458299	-0.00200205
		34.832	-0.00426407	-0.00451871	-0.00139935	-0.00284838	-6.55183e-05	-3.52038e-05	0.00576698	0.0174593	0.0147673	0.00596099	-0.0015388	0.000471047	-0.00511893	-0.00236335	0.00400268	-0.00283626	-0.00485823	-0.000265593	0.00218078	-0.000689995	-0.000120084	-0.00125081	0.000122431	0.00342064	-0.000150399	-0.00180253	-0.00574644	-0.00475819	-0.00651643	0.0012956	-0.000835505	0.00248393	0.0305702	0.0279026	0.0205362	0.0199117	0.00623685	0.00962904	0.00249605	0.000959109	-0.00397608	-0.00249674	-0.00255736	0.00117434	-0.00265437	0.00246574	0.00026794
		35.68	0.0024615	0.00178036	0.00476113	-0.000250564	-0.00193779	0.00379566	0.00644523	0.00222404	0.00567973	0.0107477	0.00629838	0.00398625	0.000858632	-0.00385311	-0.00505917	-0.00514665	0.00046807	-0.00104419	-0.00556846	-0.00160347	-0.0026908	0.000942993	-0.00211901	-0.00099107	-0.00329695	0.00141167	-0.000750484	-0.00231273	-0.000891086	-0.00614337	-0.00820241	0.00343634	0.0141096	0.0161312	0.0168061	0.0177872	0.028273	0.0229332	0.0120287	0.0107227	0.00584533	-0.00136601	-0.00108168	-3.80987e-05	0.0137909	0.00466739	0.0114601
	3	44.803	0.00115943	-0.00392899	0.0022271	-0.00157088	0.00233305	0.00259929	0.00494654	0.00275958	0.00714708	0.00278131	0.000374294	-0.000277719	0.000621516	0.00274599	0.00148	0.00283565	0.000909489	0.00139578	0.000102622	0.000330827	-0.00376871	0.00106978	-0.00156816	-0.00571388	-0.00691467	-0.0059285	-0.00132094	-6.0469e-06	-0.00294554	-0.00169313	-0.00218214	0.00340616	0.0181118	0.0167697	0.0178048	0.017036	0.0240587	0.0179406	0.0179053	0.0168159	0.0148028	0.00942098	0.0155445	0.00954052	0.00603323	0.00447926	0.00837776
		46.188	0.00233231	0.00018771	0.000193429	0.000322105	-0.00373834	0.000324964	0.00242953	0.00160601	0.00240094	0.00344464	0.00170609	-0.0010533	-0.000335572	-0.00431309	-0.00383842	-0.00175959	-0.00276326	-0.00312927	-0.00359536	0.00214358	0.00399938	0.000176272	0.00199775	0.000931171	0.00130576	0.000713852	-0.00184537	-0.00203981	-0.00171383	0.00118852	-0.0023086	0.0268008	0.0444294	0.0379755	0.0310585	0.0243788	0.0313216	0.0285307	0.0189801	0.0162894	0.0165296	0.0140847	0.0101529	0.0095353	0.00836864	0.0100357	0.00739356
		39.256	-0.00295569	-0.00160159	-0.00308822	0.000657161	0.00619744	0.0141982	0.0112768	0.00637319	0.00288422	0.00161367	0.00638183	0.00404817	0.00882497	0.0159844	0.00917934	0.00907274	0.000363293	-0.00483414	-0.00584251	-0.00530088	-0.00862562	-0.00541036	-0.00342818	-0.000596101	-0.00579354	-0.00832023	-0.00600097	-0.00778435	-0.00824244	-0.00914709	-0.0100834	0.0155868	0.0503382	0.043003	0.0289521	0.0268489	0.0256302	0.0240341	0.0209341	0.0203348	0.0200554	0.0115015	0.00925425	0.0104268	0.0112307	0.00690907	0.00250968
		36.94	0.00180791	-0.00293163	-0.00415138	-0.00222412	-0.000938435	0.0017014	0.000922892	0.000240744	0.000349786	0.00120184	-0.00424013	-0.00494003	0.000600837	0.00421445	0.00390761	-0.000494658	0.000415719	0.0064384	0.00442746	0.00479263	-0.000606236	0.00281972	0.00158729	-0.000679776	-0.000220784	-0.000712742	0.00768351	0.00218068	-0.00558414	-0.0102882	-0.00728064	0.00600477	0.0345891	0.0341098	0.022706	0.0141297	0.010653	0.00846456	0.00950934	0.00661845	0.00262446	-0.000765996	0.00157968	0.00201585	0.00289073	0.00801318	0.00190174
		42.383	-0.00361228	-0.00347863	-0.00406466	-0.00278721	0.000114669	0.00585161	0.00315535	-0.00103426	-0.0027538	0.000505357	-0.00409036	-0.00707707	-0.00533696	-0.00302111	-0.00218833	0.00427858	0.000245755	4.013e-05	-0.00272039	0.000428247	0.00631169	0.012298	0.00875349	0.00669724	0.00191389	0.000158364	-0.00106253	-0.00256617	-0.00414948	-0.00299541	0.00218634	0.00289575	0.0188882	0.0440028	0.0408079	0.0362918	0.0271287	0.0216102	0.0180966	0.0136705	0.0104627	0.011843	0.0100258	0.0141897	0.0136011	0.012794	0.0117248
		42.778	0.00465539	0.00797797	0.0118639	0.00684861	0.00814829	0.00413133	0.000858538	-0.0012351	-0.00411746	0.000457628	0.000918805	0.00320897	0.00512967	-0.0034126	-0.00418297	-0.0026658	-0.00190329	-0.00388163	-0.003258	0.00285261	0.000342333	-0.00522324	-0.00291997	-0.00141067	-0.00235922	-0.00182206	-0.00273917	-0.00200024	-0.00164912	-0.00672731	-0.00588619	-0.000121465	0.0352399	0.0420737	0.0347839	0.0227828	0.0156686	0.0087431	0.0174242	0.0190986	0.0162137	0.0114525	0.00768711	0.00967856	0.011125	0.0065001	0.004527
	4	50.445	-0.00668698	-0.00620925	-0.00614995	-0.0043313	-0.00252583	-0.0014946	-0.00464429	-0.00427859	-0.003903	-0.00210082	-0.000921334	-0.000950986	0.00413926	0.00371095	0.00259406	0.00334854	0.00594143	0.00918008	0.00753934	0.000146134	0.0031871	0.00475865	0.000515135	0.00135527	0.00283128	-0.000120733	-0.000786253	-0.00148801	0.00127949	0.0020175	0.00154636	0.00773043	0.0140397	0.0147349	0.0182239	0.0174035	0.00853432	0.00838277	0.0100334	0.00639939	0.00632691	0.0107978	0.0152785	0.00740426	0.00591507	0.00888026	0.012053
		44.753	0.00308182	0.00412914	0.00230497	-0.000921927	0.00573316	0.00446253	0.00522679	0.00541864	0.003931	0.00352528	0.00201562	-0.000814993	-0.00186861	0.00114442	0.00145893	0.00419834	0.00432729	0.00357875	0.00453172	0.00790644	0.00243707	-0.00195353	-0.00916215	-0.00750467	-0.0107379	-0.00824378	-0.00765564	-0.00556413	-0.00629694	-0.00562389	-0.00306376	0.00349697	0.0136903	0.0184174	0.0159611	0.0135236	0.00284908	0.00438075	0.00613573	0.00650686	0.00640621	0.0139199	0.010888	0.0111365	0.0080574	0.00685597	0.0129795
		41.487	-0.00105276	0.00067908	0.00180996	0.00151096	-0.000605738	-0.00124815	-0.000286014	-0.00155011	0.00126524	0.00290235	-0.0007656	-0.000137993	0.00158201	0.000590268	2.18688e-05	-0.00033042	-0.00197641	-0.00310729	-0.00261586	-0.00285861	0.00032087	-0.00121854	-0.00149682	0.000756051	0.00149023	-0.00153827	0.000220216	0.000581387	0.00282834	0.00150503	0.00272472	0.00534765	0.0146759	0.0125888	0.0165617	0.0203036	0.0133644	0.0058894	0.00744362	0.00944782	0.00646076	0.00630386	0.0115171	0.00917842	0.00449801	-0.000200162	-0.00266618
	5	40.629	-0.00134901	0.000666875	-0.000830641	-0.00738433	0.000786183	0.00326696	0.00150203	0.00620028	0.0126059	0.0138524	0.0122274	0.00451763	-0.00295761	-0.0108977	-0.00352946	-0.00113508	-0.00254209	-0.00146421	0.00415148	0.00222199	0.00618794	0.00216439	-0.000431578	-0.00348832	-0.00124616	-0.00790681	-0.00441398	-0.00516274	-0.00833056	-0.00858152	-0.00899292	0.0158806	0.0294035	0.0119229	0.0111783	0.013947	0.0107545	0.00423376	0.00142798	0.0271079	0.0594979	0.0722761	0.0750942	0.060152	0.0564699	0.0628878	0.0933977
		39.959	0.00959414	0.00230266	-0.000745703	0.00263608	0.0085026	0.00473977	3.62352e-05	0.00423568	0.00345374	-0.00155543	0.000429189	-0.00159512	-0.00588188	-0.00375438	-0.00445296	-0.00579456	-0.00396078	-0.00332967	0.00144531	-0.000412288	-0.00220638	-4.71186e-05	0.00729595	0.0114438	0.0077802	-0.000567087	-0.00154749	-0.00561991	-0.00700517	-0.00844997	-0.00677893	0.0404668	0.0444757	0.0303453	0.0183661	0.0175485	0.0354219	0.0251059	0.0107333	0.0558436	0.059142	0.0565223	0.0597056	0.0506637	0.0544027	0.0322664	0.0206365
		36.498	0.00871925	0.00449961	0.00652488	0.00291872	-0.00383742	-0.00462	0.00545916	-0.00218574	-0.00585089	-0.00689302	-0.00370371	-0.0093784	-0.008002	0.00182547	0.0142445	0.00594286	0.0021912	-0.00175709	0.00146761	-0.00312956	-0.00306664	-0.00550483	-0.00964188	-0.00635033	-0.00709751	0.00249401	-0.000203732	0.00462545	0.00304456	-0.00200091	-0.00612617	-0.00198518	0.0237141	0.059001	0.0690762	0.0495982	0.0429994	0.0765717	0.0717032	0.0689622	0.0637712	0.064597	0.0664768	0.0775824	0.0575853	0.0919126	0.0742987
		36.488	-0.00831253	-0.00534032	-0.00428941	-0.00395649	-0.00156989	0.0120357	0.00249335	0.000351423	0.017932	0.00990584	0.0065285	0.00372475	-0.00538845	-0.00585374	-0.0123918	-0.00597808	-0.0039605	0.00922797	0.00437054	-0.00468651	-0.00460629	0.0082252	-0.000932126	-0.00231194	0.00487995	-0.00781115	-0.000109852	-0.00651958	-0.00328263	-0.00513976	0.0127658	0.0185497	0.0361865	0.0399249	0.0423074	0.0261347	0.0360662	0.0713036	0.0590136	0.051922	0.0702327	0.05262	0.0404343	0.0284531	0.0459816	0.0497199	0.0388459
		35.598	0.0172806	0.0168373	0.0101673	0.003608	8.20933e-05	-0.00993329	-0.0106311	-0.00270087	-0.00471215	0.000738839	0.00527449	0.00300051	0.0038748	-0.00802051	-0.00777834	-0.00273781	-0.0013217	0.00405541	0.00462596	0.00595587	-0.00838583	-0.00522113	-0.00826269	0.00297178	-0.00570959	-0.00137917	-0.000718316	-0.00209748	-0.00937095	-0.0102329	0.0207409	0.0175926	0.00875114	0.022982	0.0263273	0.0249605	0.0434766	0.0383663	0.0624237	0.0656295	0.0370856	0.0233309	0.0176131	0.0332888	0.0530076	0.0472816	0.0463088
[truncated: 384 more columns]
